# Supplementary material
Source: publisher figshare collection journal article supplement (https://acs.figshare.com/ndownloader/files/7712047)
Supplement: Supplementary file 1 [file 7712047]

 
data_170115LT
 
_audit_creation_method            SHELXL-2014/6
_chemical_name_systematic         ?
_chemical_name_common             ?
_chemical_melting_point           ?
_chemical_formula_moiety          ?
_chemical_formula_sum
 'C19 H15 F3 N2 O6' 
_chemical_formula_weight          424.33

loop_
 _atom_type_symbol
 _atom_type_description
 _atom_type_scat_dispersion_real
 _atom_type_scat_dispersion_imag
 _atom_type_scat_source
 'C'  'C'   0.0033   0.0016
 'International Tables Vol C Tables 4.2.6.8 and 6.1.1.4'
 'H'  'H'   0.0000   0.0000
 'International Tables Vol C Tables 4.2.6.8 and 6.1.1.4'
 'N'  'N'   0.0061   0.0033
 'International Tables Vol C Tables 4.2.6.8 and 6.1.1.4'
 'O'  'O'   0.0106   0.0060
 'International Tables Vol C Tables 4.2.6.8 and 6.1.1.4'
 'F'  'F'   0.0171   0.0103
 'International Tables Vol C Tables 4.2.6.8 and 6.1.1.4'
 
_space_group_crystal_system       triclinic
_space_group_IT_number            2
_space_group_name_H-M_alt         'P -1'
_space_group_name_Hall            '-P 1'
 
_shelx_space_group_comment
;
The symmetry employed for this shelxl refinement is uniquely defined
by the following loop, which should always be used as a source of
symmetry information in preference to the above space-group names.
They are only intended as comments.
;
 
loop_
 _space_group_symop_operation_xyz
 'x, y, z'
 '-x, -y, -z'
 
_cell_length_a                    9.364(6)
_cell_length_b                    9.834(4)
_cell_length_c                    11.190(5)
_cell_angle_alpha                 109.122(9)
_cell_angle_beta                  91.307(11)
_cell_angle_gamma                 110.730(9)
_cell_volume                      899.2(8)
_cell_formula_units_Z             2
_cell_measurement_temperature     100(2)
_cell_measurement_reflns_used     2676
_cell_measurement_theta_min       2.3548
_cell_measurement_theta_max       26.1584
 
_exptl_crystal_description        Tabullar
_exptl_crystal_colour             Colorless
_exptl_crystal_density_meas       'not measured'
_exptl_crystal_density_method     'not measured'
_exptl_crystal_density_diffrn     1.567          
_exptl_crystal_F_000              436
_exptl_transmission_factor_min    ?
_exptl_transmission_factor_max    ?
_exptl_crystal_size_max           0.15
_exptl_crystal_size_mid           0.11
_exptl_crystal_size_min           0.04
_exptl_absorpt_coefficient_mu     0.137
_shelx_estimated_absorpt_T_min    ?
_shelx_estimated_absorpt_T_max    ?
_exptl_absorpt_correction_type    multi-scan
_exptl_absorpt_correction_T_min   0.8196  
_exptl_absorpt_correction_T_max   0.9485
_exptl_absorpt_process_details    'SADABS V2014/4 (Bruker AXS Inc.)'
_exptl_absorpt_special_details    ?
_diffrn_ambient_temperature       100(2)
_diffrn_radiation_wavelength      0.71073
_diffrn_radiation_type            MoK\a
_diffrn_source                    ?
_diffrn_measurement_device_type   'Bruker APEX-II CCD'
_diffrn_measurement_method        '\f and \w scans'
_diffrn_detector_area_resol_mean  8.3333
_diffrn_reflns_number             14149
_diffrn_reflns_av_unetI/netI      0.0609
_diffrn_reflns_av_R_equivalents   0.0618
_diffrn_reflns_limit_h_min        -11
_diffrn_reflns_limit_h_max        11
_diffrn_reflns_limit_k_min        -12
_diffrn_reflns_limit_k_max        12
_diffrn_reflns_limit_l_min        -14
_diffrn_reflns_limit_l_max        14
_diffrn_reflns_theta_min          1.950
_diffrn_reflns_theta_max          26.493
_diffrn_reflns_theta_full         25.242
_diffrn_measured_fraction_theta_max   0.991
_diffrn_measured_fraction_theta_full  0.999
_diffrn_reflns_Laue_measured_fraction_max    0.991
_diffrn_reflns_Laue_measured_fraction_full   0.999
_diffrn_reflns_point_group_measured_fraction_max   0.991
_diffrn_reflns_point_group_measured_fraction_full  0.999
_reflns_number_total              3691
_reflns_number_gt                 2575
_reflns_threshold_expression      'I > 2\s(I)'
_reflns_Friedel_coverage          0.000
_reflns_Friedel_fraction_max      .
_reflns_Friedel_fraction_full     .
 
_reflns_special_details
;
 Reflections were merged by SHELXL according to the crystal
 class for the calculation of statistics and refinement.
 
 _reflns_Friedel_fraction is defined as the number of unique
 Friedel pairs measured divided by the number that would be
 possible theoretically, ignoring centric projections and
 systematic absences.
;
 
_computing_data_collection        'Bruker APEX2'
_computing_cell_refinement        'SAINT V8.34A (Bruker AXS Inc., 2013)'
_computing_data_reduction         'SAINT V8.34A (Bruker AXS Inc., 2013)'
_computing_structure_solution     ?
_computing_structure_refinement   'SHELXL-2014/6 (Sheldrick, 2014)'
_computing_molecular_graphics     'Bruker SHELXTL'
_computing_publication_material   'Bruker SHELXTL'
_refine_special_details           ?
_refine_ls_structure_factor_coef  Fsqd
_refine_ls_matrix_type            full
_refine_ls_weighting_scheme       calc
_refine_ls_weighting_details
'w=1/[\s^2^(Fo^2^)+(0.0679P)^2^+0.9013P] where P=(Fo^2^+2Fc^2^)/3'
_atom_sites_solution_primary      ?
_atom_sites_solution_secondary    ?
_atom_sites_solution_hydrogens    geom
_refine_ls_hydrogen_treatment     constr
_refine_ls_extinction_method      none
_refine_ls_extinction_coef        .
_refine_ls_number_reflns          3691
_refine_ls_number_parameters      273
_refine_ls_number_restraints      0
_refine_ls_R_factor_all           0.0873
_refine_ls_R_factor_gt            0.0583
_refine_ls_wR_factor_ref          0.1632
_refine_ls_wR_factor_gt           0.1440
_refine_ls_goodness_of_fit_ref    1.029
_refine_ls_restrained_S_all       1.029
_refine_ls_shift/su_max           0.000
_refine_ls_shift/su_mean          0.000
 
loop_
 _atom_site_label
 _atom_site_type_symbol
 _atom_site_fract_x
 _atom_site_fract_y
 _atom_site_fract_z
 _atom_site_U_iso_or_equiv
 _atom_site_adp_type
 _atom_site_occupancy
 _atom_site_site_symmetry_order  
 _atom_site_calc_flag
 _atom_site_refinement_flags_posn
 _atom_site_refinement_flags_adp
 _atom_site_refinement_flags_occupancy
 _atom_site_disorder_assembly
 _atom_site_disorder_group
F1 F -0.4774(3) 0.1465(3) 0.0058(3) 0.0876(10) Uani 1 1 d . . . . .
F2 F -0.4049(3) 0.2941(3) -0.0972(2) 0.0869(10) Uani 1 1 d . . . . .
F3 F -0.5486(3) 0.3340(4) 0.0374(3) 0.1025(12) Uani 1 1 d . . . . .
O1 O -0.1484(2) 0.7124(2) 0.58957(18) 0.0251(4) Uani 1 1 d . . . . .
O2 O -0.0314(3) 0.7296(3) 0.9389(2) 0.0481(6) Uani 1 1 d . . . . .
O3 O 0.5159(2) 0.7437(3) 0.4448(2) 0.0370(5) Uani 1 1 d . . . . .
O4 O 0.5028(2) 0.9741(3) 0.67598(19) 0.0356(5) Uani 1 1 d . . . . .
O5 O 0.1414(2) 0.9630(3) 0.98558(19) 0.0351(5) Uani 1 1 d . . . . .
O6 O -0.0114(2) 0.9803(2) 0.64738(17) 0.0222(4) Uani 1 1 d . . . . .
N1 N -0.1097(3) 0.7207(3) 0.7120(2) 0.0250(5) Uani 1 1 d . . . . .
N2 N 0.0380(3) 0.8440(3) 0.9125(2) 0.0292(6) Uani 1 1 d . . . . .
C1 C -0.4317(4) 0.2924(4) 0.0181(3) 0.0332(7) Uani 1 1 d . . . . .
C2 C -0.2925(3) 0.3959(3) 0.1193(3) 0.0246(6) Uani 1 1 d . . . . .
C3 C -0.2788(3) 0.3658(3) 0.2315(3) 0.0230(6) Uani 1 1 d . . . . .
H1 H -0.3555 0.2789 0.2428 0.028 Uiso 1 1 calc R U . . .
C4 C -0.1526(3) 0.4635(3) 0.3263(2) 0.0217(6) Uani 1 1 d . . . . .
H2 H -0.1440 0.4446 0.4036 0.026 Uiso 1 1 calc R U . . .
C5 C -0.0373(3) 0.5899(3) 0.3093(2) 0.0184(5) Uani 1 1 d . . . . .
C6 C 0.1050(3) 0.6904(3) 0.4073(2) 0.0182(5) Uani 1 1 d . . . . .
C7 C 0.1053(3) 0.8049(3) 0.5223(2) 0.0175(5) Uani 1 1 d . . . . .
C8 C -0.0401(3) 0.8353(3) 0.5520(2) 0.0207(5) Uani 1 1 d . . . . .
H14 H -0.0917 0.8333 0.4719 0.025 Uiso 1 1 calc R U . . .
C9 C -0.0019(3) 0.8460(3) 0.7842(2) 0.0220(6) Uani 1 1 d . . . . .
C10 C -0.0521(3) 0.6167(3) 0.1955(3) 0.0277(6) Uani 1 1 d . . . . .
H3 H 0.0258 0.7016 0.1826 0.033 Uiso 1 1 calc R U . . .
C11 C -0.1794(3) 0.5206(3) 0.1013(3) 0.0309(7) Uani 1 1 d . . . . .
H4 H -0.1891 0.5401 0.0244 0.037 Uiso 1 1 calc R U . . .
C12 C 0.2416(3) 0.6700(3) 0.3814(2) 0.0210(6) Uani 1 1 d . . . . .
H15 H 0.2415 0.5927 0.3035 0.025 Uiso 1 1 calc R U . . .
C13 C 0.3795(3) 0.7605(3) 0.4671(3) 0.0233(6) Uani 1 1 d . . . . .
C14 C 0.5099(4) 0.6038(4) 0.3475(3) 0.0405(8) Uani 1 1 d . . . . .
H5 H 0.4412 0.5135 0.3653 0.061 Uiso 1 1 calc R U . . .
H7 H 0.6140 0.6022 0.3464 0.061 Uiso 1 1 calc R U . . .
H6 H 0.4706 0.5998 0.2640 0.061 Uiso 1 1 calc R U . . .
C15 C 0.3795(3) 0.8747(3) 0.5820(2) 0.0219(6) Uani 1 1 d . . . . .
C16 C 0.6456(3) 0.9566(4) 0.6843(3) 0.0343(7) Uani 1 1 d . . . . .
H10 H 0.6270 0.8485 0.6739 0.051 Uiso 1 1 calc R U . . .
H9 H 0.7077 1.0263 0.7682 0.051 Uiso 1 1 calc R U . . .
H8 H 0.7011 0.9829 0.6167 0.051 Uiso 1 1 calc R U . . .
C17 C 0.2420(3) 0.8959(3) 0.6088(2) 0.0193(5) Uani 1 1 d . . . . .
C18 C 0.0802(3) 0.9933(3) 0.7594(2) 0.0205(5) Uani 1 1 d . . . . .
H13 H 0.0816 1.0844 0.8339 0.025 Uiso 1 1 calc R U . . .
C19 C 0.2442(3) 1.0175(3) 0.7341(2) 0.0213(6) Uani 1 1 d . . . . .
H12 H 0.2962 1.1227 0.7306 0.026 Uiso 1 1 calc R U . . .
H11 H 0.3030 1.0099 0.8047 0.026 Uiso 1 1 calc R U . . .
 
loop_
 _atom_site_aniso_label
 _atom_site_aniso_U_11
 _atom_site_aniso_U_22
 _atom_site_aniso_U_33
 _atom_site_aniso_U_23
 _atom_site_aniso_U_13
 _atom_site_aniso_U_12
F1 0.096(2) 0.0312(12) 0.0904(19) 0.0162(12) -0.0702(16) -0.0170(12)
F2 0.0731(17) 0.100(2) 0.0304(12) 0.0163(13) -0.0251(11) -0.0242(15)
F3 0.0481(15) 0.104(2) 0.098(2) -0.0458(17) -0.0487(14) 0.0434(15)
O1 0.0163(9) 0.0281(11) 0.0241(10) 0.0059(8) 0.0030(7) 0.0040(8)
O2 0.0662(17) 0.0458(14) 0.0397(14) 0.0274(12) 0.0183(12) 0.0179(13)
O3 0.0170(10) 0.0414(13) 0.0367(12) -0.0074(10) 0.0030(9) 0.0126(9)
O4 0.0136(10) 0.0452(13) 0.0289(11) -0.0078(10) -0.0048(8) 0.0092(9)
O5 0.0284(11) 0.0505(14) 0.0234(11) 0.0106(10) 0.0011(9) 0.0145(10)
O6 0.0207(9) 0.0237(10) 0.0205(9) 0.0050(8) 0.0009(7) 0.0093(8)
N1 0.0216(12) 0.0272(13) 0.0251(12) 0.0078(10) 0.0089(9) 0.0094(10)
N2 0.0325(14) 0.0363(15) 0.0240(13) 0.0127(12) 0.0106(11) 0.0170(12)
C1 0.0356(17) 0.0271(16) 0.0261(16) 0.0045(13) -0.0118(13) 0.0053(13)
C2 0.0224(14) 0.0224(14) 0.0209(14) 0.0017(11) -0.0068(11) 0.0057(11)
C3 0.0194(13) 0.0227(14) 0.0217(14) 0.0064(11) 0.0008(10) 0.0038(11)
C4 0.0196(13) 0.0253(14) 0.0185(13) 0.0081(11) 0.0012(10) 0.0063(11)
C5 0.0170(12) 0.0188(13) 0.0151(12) 0.0020(10) -0.0007(10) 0.0058(10)
C6 0.0169(12) 0.0192(13) 0.0164(13) 0.0070(11) 0.0008(10) 0.0040(10)
C7 0.0153(12) 0.0198(13) 0.0158(12) 0.0062(10) 0.0013(9) 0.0050(10)
C8 0.0167(12) 0.0222(13) 0.0185(13) 0.0048(11) -0.0002(10) 0.0043(11)
C9 0.0199(13) 0.0289(15) 0.0213(14) 0.0097(12) 0.0090(10) 0.0127(12)
C10 0.0265(15) 0.0245(14) 0.0223(14) 0.0078(12) -0.0027(11) -0.0003(12)
C11 0.0356(17) 0.0294(16) 0.0202(14) 0.0104(13) -0.0058(12) 0.0031(13)
C12 0.0202(13) 0.0213(13) 0.0164(13) 0.0033(11) 0.0027(10) 0.0051(11)
C13 0.0141(12) 0.0293(15) 0.0232(14) 0.0054(12) 0.0046(10) 0.0083(11)
C14 0.0258(16) 0.0440(19) 0.0426(19) -0.0034(16) 0.0038(14) 0.0207(15)
C15 0.0136(12) 0.0266(14) 0.0182(13) 0.0029(11) -0.0013(10) 0.0044(11)
C16 0.0174(14) 0.0425(18) 0.0346(17) 0.0037(14) -0.0044(12) 0.0118(13)
C17 0.0157(12) 0.0220(13) 0.0162(13) 0.0065(11) 0.0009(10) 0.0032(10)
C18 0.0193(13) 0.0218(13) 0.0174(13) 0.0036(11) 0.0002(10) 0.0074(11)
C19 0.0174(13) 0.0231(14) 0.0162(13) 0.0023(11) 0.0009(10) 0.0042(11)
 
_geom_special_details
;
 All esds (except the esd in the dihedral angle between two l.s. planes)
 are estimated using the full covariance matrix.  The cell esds are taken
 into account individually in the estimation of esds in distances, angles
 and torsion angles; correlations between esds in cell parameters are only
 used when they are defined by crystal symmetry.  An approximate (isotropic)
 treatment of cell esds is used for estimating esds involving l.s. planes.
;
 
loop_
 _geom_bond_atom_site_label_1
 _geom_bond_atom_site_label_2
 _geom_bond_distance
 _geom_bond_site_symmetry_2
 _geom_bond_publ_flag
F1 C1 1.301(4) . ?
F2 C1 1.324(4) . ?
F3 C1 1.297(4) . ?
O1 N1 1.377(3) . ?
O1 C8 1.466(3) . ?
O2 N2 1.219(3) . ?
O3 C13 1.363(3) . ?
O3 C14 1.429(4) . ?
O4 C15 1.366(3) . ?
O4 C16 1.412(3) . ?
O5 N2 1.229(3) . ?
O6 C8 1.401(3) . ?
O6 C18 1.446(3) . ?
N1 C9 1.273(4) . ?
N2 C9 1.483(3) . ?
C1 C2 1.502(4) . ?
C2 C11 1.385(4) . ?
C2 C3 1.394(4) . ?
C3 C4 1.384(4) . ?
C3 H1 0.9500 . ?
C4 C5 1.400(4) . ?
C4 H2 0.9500 . ?
C5 C10 1.396(4) . ?
C5 C6 1.499(3) . ?
C6 C12 1.387(4) . ?
C6 C7 1.404(4) . ?
C7 C17 1.393(3) . ?
C7 C8 1.516(4) . ?
C8 H14 1.0000 . ?
C9 C18 1.501(4) . ?
C10 C11 1.385(4) . ?
C10 H3 0.9500 . ?
C11 H4 0.9500 . ?
C12 C13 1.396(4) . ?
C12 H15 0.9500 . ?
C13 C15 1.403(4) . ?
C14 H5 0.9800 . ?
C14 H7 0.9800 . ?
C14 H6 0.9800 . ?
C15 C17 1.400(4) . ?
C16 H10 0.9800 . ?
C16 H9 0.9800 . ?
C16 H8 0.9800 . ?
C17 C19 1.510(4) . ?
C18 C19 1.516(4) . ?
C18 H13 1.0000 . ?
C19 H12 0.9900 . ?
C19 H11 0.9900 . ?
 
loop_
 _geom_angle_atom_site_label_1
 _geom_angle_atom_site_label_2
 _geom_angle_atom_site_label_3
 _geom_angle
 _geom_angle_site_symmetry_1
 _geom_angle_site_symmetry_3
 _geom_angle_publ_flag
N1 O1 C8 115.01(19) . . ?
C13 O3 C14 117.7(2) . . ?
C15 O4 C16 123.9(2) . . ?
C8 O6 C18 108.58(19) . . ?
C9 N1 O1 116.2(2) . . ?
O2 N2 O5 124.8(2) . . ?
O2 N2 C9 119.8(3) . . ?
O5 N2 C9 115.4(2) . . ?
F3 C1 F1 108.1(3) . . ?
F3 C1 F2 104.8(3) . . ?
F1 C1 F2 104.8(3) . . ?
F3 C1 C2 113.0(3) . . ?
F1 C1 C2 113.1(2) . . ?
F2 C1 C2 112.4(3) . . ?
C11 C2 C3 120.5(2) . . ?
C11 C2 C1 120.1(2) . . ?
C3 C2 C1 119.4(2) . . ?
C4 C3 C2 119.5(2) . . ?
C4 C3 H1 120.2 . . ?
C2 C3 H1 120.2 . . ?
C3 C4 C5 120.6(2) . . ?
C3 C4 H2 119.7 . . ?
C5 C4 H2 119.7 . . ?
C10 C5 C4 119.0(2) . . ?
C10 C5 C6 119.7(2) . . ?
C4 C5 C6 121.2(2) . . ?
C12 C6 C7 119.3(2) . . ?
C12 C6 C5 118.1(2) . . ?
C7 C6 C5 122.7(2) . . ?
C17 C7 C6 119.8(2) . . ?
C17 C7 C8 119.2(2) . . ?
C6 C7 C8 120.9(2) . . ?
O6 C8 O1 109.1(2) . . ?
O6 C8 C7 113.5(2) . . ?
O1 C8 C7 110.9(2) . . ?
O6 C8 H14 107.7 . . ?
O1 C8 H14 107.7 . . ?
C7 C8 H14 107.7 . . ?
N1 C9 N2 113.2(2) . . ?
N1 C9 C18 129.1(2) . . ?
N2 C9 C18 117.6(2) . . ?
C11 C10 C5 120.5(3) . . ?
C11 C10 H3 119.7 . . ?
C5 C10 H3 119.7 . . ?
C2 C11 C10 119.9(3) . . ?
C2 C11 H4 120.1 . . ?
C10 C11 H4 120.1 . . ?
C6 C12 C13 121.5(2) . . ?
C6 C12 H15 119.2 . . ?
C13 C12 H15 119.3 . . ?
O3 C13 C12 123.1(2) . . ?
O3 C13 C15 117.7(2) . . ?
C12 C13 C15 119.2(2) . . ?
O3 C14 H5 109.5 . . ?
O3 C14 H7 109.5 . . ?
H5 C14 H7 109.5 . . ?
O3 C14 H6 109.5 . . ?
H5 C14 H6 109.5 . . ?
H7 C14 H6 109.5 . . ?
O4 C15 C17 113.2(2) . . ?
O4 C15 C13 127.2(2) . . ?
C17 C15 C13 119.6(2) . . ?
O4 C16 H10 109.5 . . ?
O4 C16 H9 109.5 . . ?
H10 C16 H9 109.5 . . ?
O4 C16 H8 109.5 . . ?
H10 C16 H8 109.5 . . ?
H9 C16 H8 109.5 . . ?
C7 C17 C15 120.6(2) . . ?
C7 C17 C19 120.7(2) . . ?
C15 C17 C19 118.7(2) . . ?
O6 C18 C9 105.5(2) . . ?
O6 C18 C19 109.4(2) . . ?
C9 C18 C19 113.9(2) . . ?
O6 C18 H13 109.3 . . ?
C9 C18 H13 109.3 . . ?
C19 C18 H13 109.3 . . ?
C17 C19 C18 109.9(2) . . ?
C17 C19 H12 109.7 . . ?
C18 C19 H12 109.7 . . ?
C17 C19 H11 109.7 . . ?
C18 C19 H11 109.7 . . ?
H12 C19 H11 108.2 . . ?
 
_refine_diff_density_max    0.768
_refine_diff_density_min   -0.453
_refine_diff_density_rms    0.065

_shelxl_version_number 2014/6

_shelx_res_file
;
TITL 170115LT in P-1
CELL 0.71073 9.3639 9.8339 11.1896 109.122 91.307 110.730
ZERR 2.00 0.0057 0.0039 0.0050 0.009 0.011 0.009
LATT 1
SFAC C  H  N  O  F
UNIT 38  30  4  12  6
L.S. 4
ACTA
BOND $H
FMAP 2
PLAN 5
TEMP -173.160
WGHT    0.067900    0.901300
FVAR       0.22012
F1    5   -0.477380    0.146491    0.005795    11.00000    0.09604    0.03122 =
         0.09035    0.01623   -0.07020   -0.01704
F2    5   -0.404861    0.294106   -0.097197    11.00000    0.07312    0.09951 =
         0.03041    0.01632   -0.02513   -0.02419
F3    5   -0.548550    0.333990    0.037442    11.00000    0.04806    0.10435 =
         0.09833   -0.04578   -0.04874    0.04344
O1    4   -0.148361    0.712394    0.589573    11.00000    0.01626    0.02810 =
         0.02415    0.00586    0.00302    0.00399
O2    4   -0.031441    0.729572    0.938883    11.00000    0.06615    0.04576 =
         0.03966    0.02739    0.01825    0.01794
O3    4    0.515928    0.743675    0.444814    11.00000    0.01698    0.04137 =
         0.03674   -0.00742    0.00303    0.01264
O4    4    0.502771    0.974055    0.675977    11.00000    0.01356    0.04525 =
         0.02887   -0.00783   -0.00477    0.00917
O5    4    0.141437    0.963023    0.985579    11.00000    0.02838    0.05055 =
         0.02340    0.01058    0.00112    0.01447
O6    4   -0.011431    0.980346    0.647378    11.00000    0.02074    0.02370 =
         0.02050    0.00501    0.00086    0.00934
N1    3   -0.109742    0.720674    0.711985    11.00000    0.02159    0.02722 =
         0.02509    0.00775    0.00886    0.00938
N2    3    0.038026    0.844041    0.912470    11.00000    0.03249    0.03631 =
         0.02400    0.01273    0.01063    0.01698
C1    1   -0.431683    0.292356    0.018101    11.00000    0.03556    0.02709 =
         0.02613    0.00446   -0.01178    0.00532
C2    1   -0.292492    0.395941    0.119304    11.00000    0.02240    0.02244 =
         0.02091    0.00173   -0.00679    0.00570
C3    1   -0.278768    0.365829    0.231523    11.00000    0.01936    0.02274 =
         0.02170    0.00639    0.00078    0.00381
AFIX  43
H1    2   -0.355466    0.278943    0.242839    11.00000   -1.20000
AFIX   0
C4    1   -0.152556    0.463479    0.326316    11.00000    0.01964    0.02526 =
         0.01848    0.00812    0.00118    0.00634
AFIX  43
H2    2   -0.144027    0.444553    0.403640    11.00000   -1.20000
AFIX   0
C5    1   -0.037319    0.589913    0.309302    11.00000    0.01703    0.01879 =
         0.01512    0.00203   -0.00072    0.00576
C6    1    0.104964    0.690379    0.407346    11.00000    0.01685    0.01916 =
         0.01642    0.00699    0.00081    0.00397
C7    1    0.105261    0.804873    0.522343    11.00000    0.01527    0.01985 =
         0.01579    0.00625    0.00130    0.00495
C8    1   -0.040132    0.835335    0.552033    11.00000    0.01665    0.02221 =
         0.01846    0.00479   -0.00024    0.00432
AFIX  13
H14   2   -0.091692    0.833328    0.471870    11.00000   -1.20000
AFIX   0
C9    1   -0.001890    0.846026    0.784234    11.00000    0.01987    0.02886 =
         0.02126    0.00971    0.00901    0.01272
C10   1   -0.052075    0.616729    0.195502    11.00000    0.02650    0.02450 =
         0.02231    0.00784   -0.00267   -0.00033
AFIX  43
H3    2    0.025825    0.701602    0.182578    11.00000   -1.20000
AFIX   0
C11   1   -0.179374    0.520601    0.101255    11.00000    0.03557    0.02938 =
         0.02022    0.01044   -0.00583    0.00314
AFIX  43
H4    2   -0.189081    0.540142    0.024367    11.00000   -1.20000
AFIX   0
C12   1    0.241632    0.669992    0.381381    11.00000    0.02016    0.02128 =
         0.01636    0.00330    0.00271    0.00506
AFIX  43
H15   2    0.241463    0.592697    0.303487    11.00000   -1.20000
AFIX   0
C13   1    0.379491    0.760485    0.467116    11.00000    0.01415    0.02933 =
         0.02323    0.00541    0.00459    0.00835
C14   1    0.509934    0.603781    0.347478    11.00000    0.02584    0.04403 =
         0.04259   -0.00340    0.00381    0.02071
AFIX 137
H5    2    0.441153    0.513456    0.365294    11.00000   -1.50000
H7    2    0.613961    0.602195    0.346433    11.00000   -1.50000
H6    2    0.470578    0.599771    0.263969    11.00000   -1.50000
AFIX   0
C15   1    0.379533    0.874736    0.581986    11.00000    0.01365    0.02664 =
         0.01825    0.00295   -0.00127    0.00444
C16   1    0.645569    0.956590    0.684317    11.00000    0.01737    0.04253 =
         0.03456    0.00367   -0.00443    0.01180
AFIX 137
H10   2    0.626980    0.848501    0.673855    11.00000   -1.50000
H9    2    0.707737    1.026284    0.768177    11.00000   -1.50000
H8    2    0.701106    0.982862    0.616708    11.00000   -1.50000
AFIX   0
C17   1    0.241953    0.895868    0.608778    11.00000    0.01571    0.02199 =
         0.01619    0.00646    0.00092    0.00325
C18   1    0.080198    0.993305    0.759350    11.00000    0.01925    0.02176 =
         0.01740    0.00365    0.00022    0.00743
AFIX  13
H13   2    0.081592    1.084406    0.833880    11.00000   -1.20000
AFIX   0
C19   1    0.244187    1.017519    0.734086    11.00000    0.01744    0.02309 =
         0.01618    0.00225    0.00094    0.00420
AFIX  23
H12   2    0.296232    1.122736    0.730581    11.00000   -1.20000
H11   2    0.302960    1.009900    0.804652    11.00000   -1.20000
AFIX   0
HKLF 4 1 1 0 0 0 1 0 0 0 1

REM  170115LT in P-1
REM R1 =  0.0583 for    2575 Fo > 4sig(Fo)  and  0.0873 for all    3691 data
REM    273 parameters refined using      0 restraints

END

WGHT      0.0679      0.9031

REM Highest difference peak  0.768,  deepest hole -0.453,  1-sigma level  0.065
Q1    1  -0.5523  0.2198  0.0750  11.00000  0.05    0.77
Q2    1  -0.4704  0.3510 -0.0419  11.00000  0.05    0.64
Q3    1   0.5027  0.8907  0.7064  11.00000  0.05    0.62
Q4    1  -0.4129  0.1997 -0.0672  11.00000  0.05    0.62
Q5    1   0.5027  0.6730  0.4865  11.00000  0.05    0.48
;
_shelx_res_checksum   70741

_shelx_hkl_file
;
   1   1  -3    4.89    0.46
   1   1  -3    3.08    0.37
  -1  -1   3    3.09    0.37
  -1  -1   3    3.33    0.34
  -1  -1   3    4.28    0.44
   2   2  -6    0.94    0.32
   2   2  -6    0.54    0.31
   2   2  -6    0.88    0.33
  -2  -2   6    0.92    0.33
  -2  -2   6    1.36    0.34
  -2  -2   6    0.81    0.24
   3   3  -9    3.49    0.65
   3   3  -9    4.20    0.68
   3   3  -9    4.10    0.71
  -3  -3   9    4.79    0.76
  -3  -3   9    4.46    0.64
   4   4 -12    0.44    0.51
   4   4 -12    0.46    0.54
  -4  -4  12    0.83    0.57
  -4  -4  12    0.43    0.48
  -3  -4  11   -0.38    0.45
  -3  -4  11    0.07    0.42
   3   4 -11    0.78    0.49
   3   4 -11    0.92    0.48
   3   4 -11   -0.74    0.43
  -2  -3   8    6.92    0.83
  -2  -3   8    7.68    0.79
   2   3  -8    6.11    0.77
   2   3  -8    8.35    0.83
   2   3  -8    5.78    0.80
  -1  -2   5   28.79    1.96
  -1  -2   5   26.42    1.91
   1   2  -5   27.57    1.95
   1   2  -5   27.61    1.93
   1   2  -5   27.21    1.92
   0  -1   2   12.30    0.84
   0  -1   2   10.97    0.84
   0   1  -2   12.11    0.84
   0   1  -2   12.27    0.84
   0   1  -2   11.86    0.85
   1   0  -1   83.07    5.55
   1   0  -1   89.11    5.56
  -1   0   1   83.05    5.55
  -1   0   1   89.46    5.57
  -1   0   1   86.61    5.55
   2   1  -4    9.76    0.79
   2   1  -4    9.81    0.83
  -2  -1   4   10.10    0.75
  -2  -1   4    9.87    0.83
  -2  -1   4    9.57    0.77
   3   2  -7    6.58    0.68
   3   2  -7    4.02    0.64
  -3  -2   7    5.44    0.63
  -3  -2   7    6.26    0.58
  -3  -2   7    4.09    0.65
   4   3 -10   22.97    1.79
   4   3 -10   23.54    1.79
   4   3 -10   18.11    1.77
  -4  -3  10   21.13    1.70
  -4  -3  10   19.47    1.80
  -3  -5  13    2.49    0.78
  -3  -5  13    2.24    0.64
  -3  -5  13    1.45    0.63
   3   5 -13    3.06    0.76
   3   5 -13    2.26    0.69
  -2  -4  10   11.50    1.27
  -2  -4  10   13.96    1.22
   2   4 -10   12.35    1.21
   2   4 -10   13.77    1.34
   2   4 -10   13.76    1.24
  -1  -3   7    0.40    0.33
  -1  -3   7    0.98    0.35
   1   3  -7    0.52    0.35
   1   3  -7    0.82    0.32
   1   3  -7    1.04    0.34
   0  -2   4   17.81    1.27
   0  -2   4   16.78    1.24
   0   2  -4   17.31    1.23
   0   2  -4   16.43    1.23
   0   2  -4   18.13    1.28
   1  -1   1   76.32    5.13
   1  -1   1   80.37    5.14
   1  -1   1   78.95    5.14
  -1   1  -1   79.60    5.13
  -1   1  -1   80.48    5.14
  -1   1  -1   81.25    5.15
   2   0  -2    1.31    0.24
   2   0  -2    0.56    0.20
  -2   0   2    0.70    0.23
  -2   0   2    0.56    0.23
   3   1  -5   13.09    0.95
   3   1  -5    9.06    0.95
  -3  -1   5   10.13    0.97
  -3  -1   5   12.40    0.93
  -3  -1   5   13.25    0.91
   4   2  -8    7.44    0.84
   4   2  -8    7.34    0.90
  -4  -2   8    7.80    0.77
  -4  -2   8    7.33    0.79
  -4  -2   8    5.69    0.84
   5   3 -11   10.81    1.24
   5   3 -11   10.90    1.22
  -5  -3  11    8.35    1.20
  -5  -3  11   10.08    1.10
  -2  -5  12    4.10    0.74
  -2  -5  12    3.02    0.74
  -2  -5  12    2.86    0.66
   2   5 -12    3.89    0.73
   2   5 -12    3.35    0.79
   2   5 -12    4.20    0.76
  -1  -4   9   13.20    1.15
  -1  -4   9   11.61    1.19
   1   4  -9   11.40    1.21
   1   4  -9   13.09    1.16
   1   4  -9   13.68    1.15
   0  -3   6    6.05    0.65
   0  -3   6    5.70    0.65
   0   3  -6    6.06    0.63
   0   3  -6    6.03    0.62
   0   3  -6    5.79    0.68
   1  -2   3   25.38    1.66
   1  -2   3   25.14    1.67
  -1   2  -3   23.59    1.65
  -1   2  -3   23.22    1.64
  -1   2  -3   24.00    1.68
   2  -1   0  244.47   14.75
   2  -1   0  220.06   14.73
  -2   1   0  246.06   14.75
  -2   1   0  214.00   14.75
  -2   1   0  222.62   14.75
   3   0  -3   21.57    1.55
   3   0  -3   22.89    1.53
  -3   0   3   21.83    1.53
  -3   0   3   21.15    1.55
   4   1  -6    0.34    0.35
   4   1  -6    0.27    0.29
  -4  -1   6   -0.13    0.27
  -4  -1   6    0.73    0.37
  -4  -1   6   -0.16    0.30
   5   2  -9    8.15    0.94
   5   2  -9    8.43    1.00
  -5  -2   9    7.96    1.02
  -5  -2   9    7.61    0.85
  -5  -2   9    7.03    0.87
  -1  -5  11    0.96    0.50
  -1  -5  11    1.41    0.51
  -1  -5  11    0.50    0.51
   1   5 -11    1.99    0.55
   1   5 -11    1.10    0.57
   1   5 -11    1.68    0.53
   0  -4   8    5.43    0.71
   0  -4   8    4.93    0.66
   0   4  -8    5.58    0.68
   0   4  -8    5.53    0.65
   0   4  -8    4.42    0.69
   1  -3   5    6.20    0.66
   1  -3   5    8.47    0.71
  -1   3  -5    7.44    0.67
  -1   3  -5    9.66    0.76
  -1   3  -5    6.77    0.68
   2  -2   2  136.80    8.50
   2  -2   2  126.81    8.49
   2  -2   2  128.73    8.48
  -2   2  -2  137.21    8.52
  -2   2  -2  130.51    8.51
  -2   2  -2  129.02    8.48
   3  -1  -1   76.51    5.06
   3  -1  -1   75.98    5.08
  -3   1   1   78.02    5.09
  -3   1   1   77.13    5.07
  -3   1   1   82.22    5.09
   4   0  -4    1.30    0.31
   4   0  -4    1.70    0.36
  -4   0   4    1.59    0.35
  -4   0   4    1.31    0.33
   5   1  -7    3.27    0.56
   5   1  -7    3.03    0.60
  -5  -1   7    2.42    0.56
  -5  -1   7    2.80    0.54
  -5  -1   7    3.43    0.52
   6   2 -10   25.69    2.05
  -6  -2  10   25.78    1.93
  -6  -2  10   25.04    2.13
  -6  -2  10   23.83    1.96
  -1  -6  13    0.13    0.53
  -1  -6  13    0.68    0.52
  -1  -6  13   -0.03    0.48
   1   6 -13    0.77    0.56
   1   6 -13   -0.27    0.43
   1   6 -13   -0.14    0.47
   0  -5  10    9.92    1.04
   0  -5  10    9.92    1.06
   0  -5  10   10.55    1.05
   0   5 -10    9.24    1.13
   0   5 -10    9.74    1.03
   0   5 -10   11.13    1.05
   1  -4   7   -0.17    0.30
   1  -4   7    0.26    0.28
  -1   4  -7   -0.11    0.32
  -1   4  -7   -0.04    0.28
  -1   4  -7    0.46    0.30
   2  -3   4   77.94    5.39
   2  -3   4   84.27    5.43
   2  -3   4   80.46    5.41
  -2   3  -4   81.71    5.41
  -2   3  -4   82.67    5.39
  -2   3  -4   88.65    5.45
   3  -2   1   22.39    1.43
   3  -2   1   20.44    1.43
   3  -2   1   20.72    1.44
  -3   2  -1   19.80    1.45
  -3   2  -1   21.34    1.46
  -3   2  -1   21.38    1.48
  -3   2  -1   20.49    1.48
   4  -1  -2  169.99   10.76
   4  -1  -2  166.80   10.79
  -4   1   2  166.88   10.80
  -4   1   2  163.73   10.76
  -4   1   2  164.91   10.78
   5   0  -5    0.90    0.33
   5   0  -5    1.08    0.35
  -5   0   5    0.81    0.36
  -5   0   5    0.44    0.34
   6   1  -8    0.56    0.46
  -6  -1   8    0.58    0.47
  -6  -1   8    0.81    0.40
  -6  -1   8    0.30    0.45
   7   2 -11    4.53    0.86
   7   2 -11    4.51    0.90
  -7  -2  11    2.54    0.82
  -7  -2  11    4.57    0.81
  -7  -2  11    7.36    0.88
   0  -6  12    1.96    0.59
   0  -6  12    2.53    0.65
   0  -6  12    2.91    0.71
   0   6 -12    2.72    0.64
   0   6 -12    2.82    0.66
   0   6 -12    3.12    0.73
   1  -5   9    5.13    0.76
   1  -5   9    5.55    0.72
   1  -5   9    5.60    0.75
  -1   5  -9    5.84    0.73
  -1   5  -9    4.90    0.70
  -1   5  -9    6.01    0.81
   2  -4   6   13.16    1.16
   2  -4   6   14.21    1.16
   2  -4   6   15.83    1.15
  -2   4  -6   14.25    1.19
  -2   4  -6   15.30    1.14
  -2   4  -6   15.04    1.16
   3  -3   3   14.52    1.03
   3  -3   3   15.70    1.03
   3  -3   3   11.91    1.02
  -3   3  -3   12.11    1.04
  -3   3  -3   14.84    1.06
   4  -2   0   50.89    3.37
   4  -2   0   52.89    3.39
  -4   2   0   49.40    3.40
  -4   2   0   52.65    3.41
  -4   2   0   49.45    3.40
   5  -1  -3   22.57    1.70
   5  -1  -3   27.05    1.75
  -5   1   3   23.30    1.74
  -5   1   3   22.63    1.69
  -5   1   3   25.10    1.78
   6   0  -6    5.61    0.74
   6   0  -6    5.86    0.74
  -6   0   6    6.71    0.78
  -6   0   6    5.28    0.79
   7   1  -9    0.47    0.48
  -7  -1   9    0.25    0.53
  -7  -1   9    0.43    0.48
  -7  -1   9    0.14    0.41
   1  -6  11    0.46    0.47
   1  -6  11   -0.81    0.40
   1  -6  11    0.22    0.43
  -1   6 -11    0.07    0.45
  -1   6 -11    1.20    0.51
  -1   6 -11    0.30    0.43
   2  -5   8    9.95    0.95
   2  -5   8    9.05    0.93
   2  -5   8    9.56    0.92
  -2   5  -8    9.16    0.90
  -2   5  -8    9.10    0.93
  -2   5  -8    8.34    0.98
   3  -4   5   -0.13    0.23
   3  -4   5    0.33    0.28
   3  -4   5    0.36    0.24
  -3   4  -5    0.14    0.29
  -3   4  -5    0.07    0.28
  -3   4  -5    0.55    0.25
   4  -3   2   17.21    1.18
   4  -3   2   18.07    1.19
   4  -3   2   14.56    1.17
  -4   3  -2   16.84    1.20
  -4   3  -2   14.90    1.21
  -4   3  -2   16.29    1.23
   5  -2  -1  142.16    9.61
   5  -2  -1  148.87    9.59
  -5   2   1  147.54    9.63
  -5   2   1  154.35    9.65
  -5   2   1  147.07    9.61
   6  -1  -4    3.70    0.51
   6  -1  -4    2.47    0.47
  -6   1   4    3.81    0.58
  -6   1   4    4.06    0.51
  -6   1   4    2.79    0.54
   7   0  -7   -0.58    0.36
  -7   0   7    0.18    0.43
  -7   0   7    0.23    0.45
   8   1 -10    1.40    0.64
  -8  -1  10    1.74    0.66
  -8  -1  10    1.36    0.60
  -8  -1  10    2.27    0.60
   1  -7  13    0.10    0.50
   1  -7  13    0.41    0.52
  -1   7 -13   -0.28    0.43
  -1   7 -13   -0.40    0.50
  -1   7 -13   -0.10    0.53
   2  -6  10    5.31    0.80
   2  -6  10    3.77    0.71
   2  -6  10    5.82    0.77
  -2   6 -10    3.78    0.64
  -2   6 -10    4.32    0.77
  -2   6 -10    5.30    0.76
   3  -5   7    1.14    0.39
   3  -5   7    1.19    0.41
   3  -5   7    1.92    0.42
  -3   5  -7    1.71    0.47
  -3   5  -7    1.98    0.46
  -3   5  -7    1.82    0.42
   4  -4   4   29.84    2.10
   4  -4   4   29.71    2.11
   4  -4   4   30.98    2.09
  -4   4  -4   30.92    2.16
  -4   4  -4   29.29    2.06
  -4   4  -4   30.56    2.14
   5  -3   1   21.59    1.46
   5  -3   1   19.38    1.46
  -5   3  -1   18.57    1.51
  -5   3  -1   22.15    1.52
  -5   3  -1   21.55    1.54
   6  -2  -2    0.28    0.26
   6  -2  -2    0.00    0.26
  -6   2   2    0.42    0.35
  -6   2   2    0.20    0.29
  -6   2   2   -0.22    0.29
   7  -1  -5    4.86    0.69
  -7   1   5    5.37    0.73
  -7   1   5    5.35    0.76
   8   0  -8    0.79    0.55
  -8   0   8    0.41    0.42
  -8   0   8   -0.56    0.44
   2  -7  12    1.19    0.55
   2  -7  12    0.39    0.53
  -2   7 -12    0.48    0.48
  -2   7 -12    0.76    0.56
  -2   7 -12    0.30    0.44
   3  -6   9   28.19    2.02
   3  -6   9   24.92    2.00
   3  -6   9   27.83    2.03
  -3   6  -9   26.83    1.96
  -3   6  -9   22.70    2.05
  -3   6  -9   26.58    1.99
   4  -5   6    0.62    0.36
   4  -5   6   -0.11    0.27
   4  -5   6    0.26    0.31
  -4   5  -6    0.56    0.31
  -4   5  -6    0.25    0.34
  -4   5  -6    0.14    0.34
   5  -4   3   10.77    0.96
   5  -4   3   12.67    0.98
   5  -4   3   12.92    0.98
  -5   4  -3   13.41    1.00
  -5   4  -3   10.44    1.02
  -5   4  -3   13.21    1.07
  -5   4  -3   13.21    1.05
   6  -3   0   13.54    1.12
   6  -3   0   16.93    1.13
  -6   3   0   14.55    1.19
  -6   3   0   13.62    1.19
  -6   3   0   13.59    1.18
   7  -2  -3    1.34    0.40
   7  -2  -3    1.28    0.37
  -7   2   3    1.48    0.41
  -7   2   3    1.20    0.43
  -7   2   3    1.56    0.47
   8  -1  -6    0.13    0.39
  -8   1   6   -0.22    0.35
  -8   1   6   -0.50    0.43
   9   0  -9    2.15    0.63
  -9   0   9    1.52    0.67
  -9   0   9    1.94    0.60
  -9   0   9    1.10    0.57
   3  -7  11    1.35    0.54
   3  -7  11    1.09    0.52
  -3   7 -11    1.53    0.54
  -3   7 -11    0.62    0.45
  -3   7 -11    0.80    0.56
   4  -6   8    1.17    0.45
   4  -6   8    0.50    0.40
   4  -6   8    0.42    0.37
  -4   6  -8    0.21    0.40
  -4   6  -8    0.77    0.45
  -4   6  -8    0.15    0.34
   5  -5   5    0.11    0.25
   5  -5   5    0.91    0.36
   5  -5   5    0.54    0.32
  -5   5  -5    0.35    0.35
  -5   5  -5    0.80    0.31
  -5   5  -5    0.38    0.37
   6  -4   2    0.15    0.27
   6  -4   2    0.18    0.26
   6  -4   2    0.36    0.25
  -6   4  -2    0.04    0.33
  -6   4  -2    0.37    0.36
  -6   4  -2    0.88    0.37
   7  -3  -1    2.46    0.42
   7  -3  -1    2.64    0.45
  -7   3   1    1.82    0.46
  -7   3   1    2.78    0.50
  -7   3   1    2.11    0.50
   8  -2  -4    0.35    0.35
  -8   2   4    0.89    0.39
  -8   2   4    0.88    0.46
  -8   2   4    0.49    0.42
   9  -1  -7    0.43    0.51
  -9   1   7    0.90    0.56
  -9   1   7    0.22    0.47
   4  -7  10    1.13    0.52
   4  -7  10    0.34    0.49
  -4   7 -10    0.43    0.44
  -4   7 -10   -0.16    0.42
  -4   7 -10    1.29    0.49
   5  -6   7    2.13    0.49
   5  -6   7    1.30    0.51
   5  -6   7    2.53    0.51
  -5   6  -7    1.78    0.51
  -5   6  -7    2.42    0.57
  -5   6  -7    2.29    0.39
   6  -5   4   -0.14    0.30
   6  -5   4    0.34    0.28
   6  -5   4    0.47    0.32
  -6   5  -4    0.24    0.38
  -6   5  -4   -0.28    0.30
  -6   5  -4    0.30    0.37
  -6   5  -4    0.01    0.33
   7  -4   1    0.50    0.27
   7  -4   1   -0.21    0.33
  -7   4  -1    0.70    0.37
  -7   4  -1    0.19    0.37
  -7   4  -1    0.04    0.36
   8  -3  -2    0.42    0.36
  -8   3   2    0.19    0.43
  -8   3   2   -0.30    0.36
  -8   3   2    0.00    0.36
   9  -2  -5    0.57    0.45
  -9   2   5   -0.01    0.44
  -9   2   5    0.05    0.39
   4  -8  12   -0.11    0.46
   4  -8  12   -0.13    0.52
  -4   8 -12   -1.12    0.40
  -4   8 -12    0.01    0.48
  -4   8 -12   -0.02    0.54
   5  -7   9   -0.11    0.41
   5  -7   9    0.46    0.46
  -5   7  -9    0.43    0.46
  -5   7  -9    0.16    0.48
  -5   7  -9   -0.09    0.28
  -5   7  -9   -0.16    0.34
   6  -6   6    0.33    0.36
   6  -6   6    0.67    0.37
  -6   6  -6   -0.11    0.30
  -6   6  -6    0.74    0.41
  -6   6  -6    1.56    0.47
   7  -5   3    3.63    0.52
   7  -5   3    3.04    0.52
  -7   5  -3    3.55    0.61
  -7   5  -3    2.61    0.55
  -7   5  -3    2.85    0.60
   8  -4   0    2.66    0.48
  -8   4   0    1.65    0.49
  -8   4   0    2.61    0.55
  -8   4   0    2.37    0.55
   9  -3  -3    7.02    0.87
  -9   3   3    7.31    0.94
  -9   3   3    6.84    0.94
  -9   3   3    7.98    0.92
  10  -2  -6   -0.51    0.41
 -10   2   6    0.46    0.49
 -10   2   6    0.10    0.49
   5  -8  11    0.72    0.53
   5  -8  11    1.04    0.55
  -5   8 -11    0.02    0.48
  -5   8 -11    0.26    0.41
  -5   8 -11    0.66    0.59
   6  -7   8    0.14    0.41
   6  -7   8    0.54    0.44
  -6   7  -8    0.58    0.46
  -6   7  -8   -0.22    0.30
  -6   7  -8   -0.06    0.39
   7  -6   5    2.57    0.54
   7  -6   5    4.35    0.62
  -7   6  -5    3.72    0.58
  -7   6  -5    2.82    0.61
  -7   6  -5    3.53    0.66
  -7   6  -5    5.92    0.78
   8  -5   2    0.47    0.39
  -8   5  -2    0.19    0.40
  -8   5  -2    0.91    0.49
  -8   5  -2    0.02    0.34
   9  -4  -1    4.30    0.62
  -9   4   1    4.23    0.72
  -9   4   1    3.57    0.65
  -9   4   1    3.16    0.64
  10  -3  -4    0.07    0.43
 -10   3   4    0.23    0.45
 -10   3   4   -0.28    0.43
 -10   3   4   -0.08    0.43
   6  -8  10   -0.64    0.41
   6  -8  10    0.33    0.49
  -6   8 -10   -0.10    0.48
  -6   8 -10    0.01    0.45
   7  -7   7   -0.06    0.39
   7  -7   7   -0.05    0.40
  -7   7  -7    0.17    0.43
  -7   7  -7    0.06    0.44
  -7   7  -7    0.13    0.37
   8  -6   4   -0.23    0.31
   8  -6   4    0.18    0.35
  -8   6  -4    0.15    0.43
  -8   6  -4   -0.46    0.35
  -8   6  -4    0.05    0.41
   9  -5   1    1.95    0.50
  -9   5  -1    2.01    0.56
  -9   5  -1    1.90    0.53
  -9   5  -1    1.23    0.49
  10  -4  -2    0.59    0.49
 -10   4   2   -0.19    0.38
 -10   4   2    1.19    0.52
 -10   4   2    1.25    0.52
  11  -3  -5    0.99    0.59
 -11   3   5    1.94    0.67
 -11   3   5    0.93    0.58
   7  -8   9    3.93    0.74
   7  -8   9    4.58    0.76
  -7   8  -9    4.76    0.84
  -7   8  -9    3.33    0.76
   8  -7   6   21.66    1.78
   8  -7   6   23.74    1.81
  -8   7  -6   23.74    1.97
  -8   7  -6   22.74    1.76
  -8   7  -6   21.84    1.90
  -8   7  -6   21.21    1.91
  -8   7  -6   24.51    1.93
   9  -6   3    4.06    0.67
  -9   6  -3    4.89    0.71
  -9   6  -3    3.48    0.67
  -9   6  -3    3.25    0.70
  10  -5   0    1.83    0.51
 -10   5   0    2.11    0.59
 -10   5   0    1.81    0.59
 -10   5   0    1.06    0.53
 -11   4   3    2.46    0.69
 -11   4   3    1.23    0.59
 -11   4   3    2.14    0.62
   8  -8   8    6.72    0.90
   8  -8   8    6.16    0.91
  -8   8  -8    7.84    1.00
  -8   8  -8    6.56    0.80
  -8   8  -8    5.13    0.92
  -8   8  -8    6.21    0.95
   9  -7   5    1.16    0.51
   9  -7   5    1.74    0.47
  -9   7  -5    1.05    0.50
  -9   7  -5    1.28    0.60
  -9   7  -5    0.38    0.50
  10  -6   2    3.84    0.70
 -10   6  -2    3.88    0.71
 -10   6  -2    3.30    0.75
 -10   6  -2    2.39    0.64
 -11   5   1    0.69    0.51
 -11   5   1    0.62    0.59
 -11   5   1    0.57    0.51
   9  -8   7   -0.27    0.39
   9  -8   7    1.13    0.55
  -9   8  -7    0.10    0.51
  -9   8  -7   -0.03    0.51
  -9   8  -7    0.98    0.56
  -9   8  -7    0.84    0.46
 -10   7  -4    0.72    0.44
 -10   7  -4    1.16    0.54
 -10   7  -4    0.33    0.44
 -11   6  -1    0.51    0.54
 -11   6  -1    0.10    0.48
 -11   6  -1   -0.13    0.47
  10  -8   6    0.49    0.43
 -10   8  -6   -0.35    0.43
 -10   8  -6   -0.43    0.47
 -10   8  -6    0.80    0.59
 -11   7  -3    0.36    0.48
 -11   7  -3   -0.71    0.54
 -11   7  -3    0.15    0.45
 -11   7  -2   -0.57    0.52
 -11   7  -2    0.53    0.49
 -11   7  -2    0.23    0.50
 -10   8  -5    3.67    0.82
 -10   8  -5    3.27    0.75
 -10   8  -5    4.01    0.72
  10  -8   5    5.05    0.81
 -11   6   0    0.71    0.51
 -11   6   0    0.14    0.50
 -11   6   0   -0.14    0.51
 -10   7  -3    0.03    0.43
 -10   7  -3   -0.28    0.46
 -10   7  -3   -0.03    0.42
  10  -7   3    0.46    0.49
  -9   8  -6    0.86    0.47
  -9   8  -6    0.96    0.56
  -9   8  -6    1.79    0.62
   9  -8   6    1.02    0.49
   9  -8   6    0.10    0.47
  -8   9  -9    0.35    0.50
  -8   9  -9    1.62    0.61
  -8   9  -9    0.48    0.55
   8  -9   9    1.19    0.59
   8  -9   9    1.59    0.60
 -11   5   2   -0.08    0.44
 -11   5   2   -0.06    0.48
 -11   5   2   -0.42    0.52
  11  -5  -2   -0.06    0.50
 -10   6  -1    0.91    0.49
 -10   6  -1   -0.39    0.47
 -10   6  -1    0.44    0.44
  10  -6   1    0.11    0.42
  -9   7  -4    5.28    0.80
  -9   7  -4    6.99    0.99
  -9   7  -4    6.16    0.92
   9  -7   4    5.33    0.81
  -8   8  -7    3.99    0.81
  -8   8  -7    4.06    0.65
  -8   8  -7    3.37    0.81
  -8   8  -7    3.43    0.76
  -8   8  -7    4.47    0.75
   8  -8   7    4.45    0.73
   8  -8   7    5.15    0.77
  -7   9 -10    4.77    0.82
  -7   9 -10    1.97    0.75
   7  -9  10    3.78    0.74
   7  -9  10    2.54    0.69
 -11   4   4   -0.48    0.44
 -11   4   4    0.73    0.55
 -11   4   4    0.56    0.55
  11  -4  -4   -0.17    0.44
 -10   5   1    0.67    0.46
 -10   5   1    1.19    0.53
 -10   5   1    0.58    0.47
  10  -5  -1    0.08    0.41
  -9   6  -2    1.06    0.48
  -9   6  -2    1.56    0.53
  -9   6  -2    0.81    0.52
   9  -6   2    0.85    0.46
  -8   7  -5    1.04    0.57
  -8   7  -5    0.83    0.49
  -8   7  -5    0.80    0.52
  -8   7  -5    0.42    0.43
   8  -7   5    0.79    0.43
   8  -7   5    2.11    0.52
  -7   8  -8    7.28    0.82
  -7   8  -8    7.92    1.02
  -7   8  -8    6.85    1.01
   7  -8   8    6.52    0.92
   7  -8   8    8.23    0.96
 -10   4   3    0.91    0.50
 -10   4   3   -0.10    0.43
 -10   4   3   -0.02    0.43
  10  -4  -3    0.63    0.47
  -9   5   0    0.33    0.42
  -9   5   0    0.13    0.43
  -9   5   0   -0.08    0.41
   9  -5   0    0.75    0.43
  -8   6  -3    3.07    0.64
  -8   6  -3    3.33    0.62
  -8   6  -3    4.36    0.74
   8  -6   3    5.19    0.68
  -7   7  -6    4.31    0.76
  -7   7  -6    3.36    0.70
  -7   7  -6    5.04    0.67
   7  -7   6    4.97    0.72
   7  -7   6    5.76    0.76
  -6   8  -9    0.65    0.49
  -6   8  -9   -0.25    0.46
  -6   8  -9   -0.25    0.33
   6  -8   9   -0.48    0.41
   6  -8   9   -0.03    0.43
 -10   3   5    2.23    0.65
 -10   3   5    2.06    0.65
  10  -3  -5    2.52    0.65
  -9   4   2    9.52    1.17
  -9   4   2   13.79    1.18
  -9   4   2   11.58    1.18
   9  -4  -2   10.41    1.08
  -8   5  -1   14.31    1.27
  -8   5  -1   13.98    1.31
  -8   5  -1   14.48    1.30
   8  -5   1   13.27    1.20
  -7   6  -4    3.33    0.64
  -7   6  -4    3.59    0.68
  -7   6  -4    4.13    0.60
  -7   6  -4    2.55    0.60
  -7   6  -4    3.97    0.66
   7  -6   4    4.15    0.59
   7  -6   4    4.21    0.63
  -6   7  -7    1.09    0.51
  -6   7  -7    0.92    0.37
  -6   7  -7    2.08    0.52
   6  -7   7    1.32    0.48
   6  -7   7    1.20    0.46
  -5   8 -10    1.74    0.51
  -5   8 -10    1.21    0.56
  -5   8 -10    1.43    0.63
   5  -8  10    3.01    0.64
   5  -8  10    1.80    0.62
 -10   2   7    1.88    0.65
 -10   2   7    2.42    0.68
  10  -2  -7    1.07    0.54
  -9   3   4    0.36    0.42
  -9   3   4    0.57    0.48
  -9   3   4   -0.35    0.43
   9  -3  -4   -0.19    0.41
  -8   4   1    0.45    0.42
  -8   4   1    0.03    0.36
  -8   4   1    0.37    0.37
   8  -4  -1    0.25    0.35
  -7   5  -2    2.57    0.53
  -7   5  -2    2.18    0.52
  -7   5  -2    1.99    0.54
   7  -5   2    2.25    0.43
   7  -5   2    2.51    0.51
  -6   6  -5   -0.20    0.40
  -6   6  -5    0.32    0.39
  -6   6  -5    0.18    0.33
   6  -6   5    0.40    0.39
   6  -6   5    0.03    0.34
   6  -6   5    0.25    0.31
  -5   7  -8    5.99    0.83
  -5   7  -8    4.46    0.81
  -5   7  -8    4.64    0.60
  -5   7  -8    7.13    0.75
   5  -7   8    5.67    0.78
   5  -7   8    6.24    0.83
  -4   8 -11    0.81    0.52
  -4   8 -11   -0.61    0.42
  -4   8 -11   -0.97    0.45
   4  -8  11    0.19    0.49
   4  -8  11    0.19    0.51
  -9   2   6    2.55    0.64
  -9   2   6    2.73    0.64
   9  -2  -6    3.19    0.66
  -8   3   3    1.80    0.52
  -8   3   3    1.12    0.48
  -8   3   3    1.60    0.44
   8  -3  -3    0.66    0.42
  -7   4   0    2.31    0.49
  -7   4   0    1.02    0.44
  -7   4   0    2.06    0.48
   7  -4   0    1.61    0.37
   7  -4   0    2.25    0.44
  -6   5  -3   22.87    1.68
  -6   5  -3   18.70    1.61
  -6   5  -3   21.17    1.63
  -6   5  -3   20.19    1.56
  -6   5  -3   20.31    1.64
   6  -5   3   21.22    1.54
   6  -5   3   19.57    1.54
   6  -5   3   22.21    1.57
  -5   6  -6   -0.32    0.37
  -5   6  -6   -0.46    0.33
   5  -6   6    0.04    0.31
   5  -6   6    0.37    0.33
   5  -6   6   -0.16    0.33
  -4   7  -9    0.45    0.45
  -4   7  -9    0.15    0.40
  -4   7  -9    0.67    0.51
   4  -7   9   -0.31    0.39
   4  -7   9    0.00    0.42
  -3   8 -12    0.67    0.50
  -3   8 -12    0.46    0.53
  -3   8 -12    0.25    0.55
   3  -8  12    1.27    0.58
   3  -8  12   -0.26    0.46
  -9   1   8    1.19    0.60
  -9   1   8    0.73    0.58
   9  -1  -8    0.15    0.49
  -8   2   5   -0.14    0.37
  -8   2   5   -0.12    0.43
   8  -2  -5    0.18    0.39
  -7   3   2    1.68    0.46
  -7   3   2    1.69    0.44
  -7   3   2    2.27    0.50
   7  -3  -2    1.87    0.42
   7  -3  -2    1.40    0.41
  -6   4  -1   -0.24    0.32
  -6   4  -1   -0.17    0.26
  -6   4  -1    0.33    0.34
   6  -4   1    0.05    0.30
   6  -4   1    0.00    0.23
  -5   5  -4    6.59    0.69
  -5   5  -4    7.53    0.81
  -5   5  -4    6.37    0.77
   5  -5   4    7.15    0.71
   5  -5   4    7.22    0.73
   5  -5   4    7.11    0.74
  -4   6  -7    1.41    0.51
  -4   6  -7    2.10    0.45
  -4   6  -7    2.09    0.51
   4  -6   7    1.37    0.44
   4  -6   7    1.41    0.43
   4  -6   7    1.80    0.49
  -3   7 -10    4.33    0.70
  -3   7 -10    4.40    0.81
  -3   7 -10    5.44    0.78
   3  -7  10    4.61    0.77
   3  -7  10    3.79    0.75
   3  -7  10    5.57    0.78
   2  -8  13    0.20    0.61
  -8   1   7   -0.07    0.43
  -8   1   7    0.23    0.46
   8  -1  -7   -0.01    0.44
  -7   2   4   -0.04    0.36
  -7   2   4   -0.42    0.38
  -7   2   4    0.21    0.31
   7  -2  -4    0.08    0.30
   7  -2  -4    0.19    0.32
  -6   3   1   25.33    1.75
  -6   3   1   24.58    1.77
  -6   3   1   22.86    1.78
   6  -3  -1   23.42    1.72
   6  -3  -1   23.64    1.72
  -5   4  -2    1.79    0.37
  -5   4  -2    1.14    0.36
  -5   4  -2    1.88    0.44
  -5   4  -2    1.34    0.38
  -5   4  -2    1.68    0.38
   5  -4   2    1.32    0.32
   5  -4   2    1.60    0.33
   5  -4   2    1.91    0.36
  -4   5  -5   33.73    2.31
  -4   5  -5   34.26    2.42
  -4   5  -5   33.45    2.38
   4  -5   5   32.04    2.35
   4  -5   5   31.89    2.34
   4  -5   5   34.33    2.34
  -3   6  -8    1.82    0.54
  -3   6  -8    0.70    0.43
   3  -6   8    1.15    0.42
  -2   7 -11    1.64    0.59
  -2   7 -11    1.20    0.49
  -2   7 -11    2.47    0.70
   2  -7  11    1.70    0.54
   2  -7  11    2.77    0.67
   2  -7  11    1.35    0.55
  -8   0   9    2.04    0.60
  -8   0   9    3.02    0.76
  -8   0   9    2.26    0.59
   8   0  -9    1.10    0.56
  -7   1   6    1.16    0.49
  -7   1   6    2.56    0.54
   7  -1  -6    1.38    0.48
  -6   2   3   66.72    4.35
  -6   2   3   64.56    4.24
  -6   2   3   64.75    4.31
   6  -2  -3   61.00    4.30
   6  -2  -3   62.24    4.26
  -5   3   0   12.54    1.04
  -5   3   0   13.57    1.05
   5  -3   0   12.81    1.01
  -4   4  -3    2.84    0.47
  -4   4  -3    2.93    0.44
   4  -4   3    2.88    0.43
   4  -4   3    3.43    0.43
   4  -4   3    3.58    0.43
  -3   5  -6    0.63    0.32
  -3   5  -6    0.56    0.37
  -3   5  -6    0.45    0.34
   3  -5   6    0.50    0.32
   3  -5   6    0.55    0.30
   3  -5   6    0.42    0.34
  -2   6  -9    6.08    0.75
  -2   6  -9    5.83    0.79
  -2   6  -9    6.29    0.86
   2  -6   9    6.10    0.82
   2  -6   9    5.40    0.78
   2  -6   9    6.72    0.85
  -1   7 -12   -0.37    0.50
  -1   7 -12    0.58    0.49
  -1   7 -12    0.16    0.52
   1  -7  12    0.29    0.47
   1  -7  12   -0.22    0.48
   1  -7  12    0.80    0.55
  -7   0   8    6.03    0.94
  -7   0   8    6.67    0.85
   7   0  -8    5.67    0.82
  -6   1   5    7.12    0.87
  -6   1   5    7.33    0.82
   6  -1  -5    6.79    0.80
   6  -1  -5    7.52    0.80
  -5   2   2    6.49    0.65
  -5   2   2    6.71    0.69
  -5   2   2    6.76    0.62
   5  -2  -2    5.89    0.61
   5  -2  -2    5.42    0.62
  -4   3  -1   56.77    3.66
  -4   3  -1   56.83    3.62
  -4   3  -1   57.06    3.63
  -4   3  -1   45.81    3.63
   4  -3   1   53.78    3.60
   4  -3   1   57.04    3.60
   4  -3   1   54.32    3.62
  -3   4  -4    0.22    0.29
  -3   4  -4    0.38    0.30
  -3   4  -4    0.30    0.24
   3  -4   4    0.95    0.29
   3  -4   4   -0.01    0.24
   3  -4   4    0.42    0.24
  -2   5  -7   11.32    1.09
  -2   5  -7   12.85    1.07
  -2   5  -7   12.95    1.02
   2  -5   7   12.62    1.07
   2  -5   7   11.48    1.03
   2  -5   7   10.28    1.04
  -1   6 -10    0.89    0.50
  -1   6 -10    1.56    0.51
  -1   6 -10    1.24    0.49
   1  -6  10    1.99    0.58
   1  -6  10    2.10    0.57
   0   7 -13   -0.42    0.46
   0   7 -13    0.10    0.56
   0   7 -13   -0.29    0.49
   0  -7  13    0.18    0.50
   0  -7  13   -0.86    0.47
  -7  -1  10    1.98    0.57
  -7  -1  10    1.54    0.65
  -7  -1  10    1.85    0.61
   7   1 -10    1.16    0.59
  -6   0   7    5.41    0.72
  -6   0   7    6.80    0.88
   6   0  -7    3.93    0.71
   6   0  -7    5.23    0.72
  -5   1   4   -0.09    0.29
  -5   1   4    0.32    0.28
   5  -1  -4   -0.12    0.24
   5  -1  -4    0.15    0.25
  -4   2   1  110.19    7.47
  -4   2   1  110.86    7.45
  -4   2   1  119.67    7.50
   4  -2  -1  121.71    7.48
   4  -2  -1  111.36    7.45
  -3   3  -2   27.36    2.02
  -3   3  -2   31.96    2.02
   3  -3   2   27.84    1.98
   3  -3   2   28.06    1.99
   3  -3   2   30.93    2.00
  -2   4  -5   40.43    2.74
  -2   4  -5   41.39    2.79
  -2   4  -5   39.67    2.71
   2  -4   5   39.11    2.73
   2  -4   5   38.88    2.72
   2  -4   5   40.72    2.76
  -1   5  -8   18.66    1.54
  -1   5  -8   20.10    1.56
  -1   5  -8   18.63    1.60
   1  -5   8   21.32    1.56
   1  -5   8   19.03    1.58
   1  -5   8   21.25    1.57
   0   6 -11    2.48    0.65
   0   6 -11    3.21    0.63
   0   6 -11    4.02    0.68
   0  -6  11    2.38    0.57
   0  -6  11    2.07    0.59
   0  -6  11    2.28    0.63
  -6  -1   9    3.03    0.59
  -6  -1   9    0.37    0.46
  -6  -1   9    0.85    0.54
   6   1  -9    1.43    0.55
  -5   0   6    0.65    0.39
  -5   0   6    0.48    0.36
   5   0  -6    0.73    0.36
   5   0  -6    0.39    0.35
  -4   1   3    8.73    0.75
  -4   1   3   10.86    0.85
  -4   1   3    9.34    0.81
   4  -1  -3   11.06    0.85
   4  -1  -3    8.42    0.78
  -3   2   0   83.91    5.46
  -3   2   0   79.82    5.46
  -3   2   0   84.86    5.48
   3  -2   0   89.67    5.48
   3  -2   0   81.18    5.45
  -2   3  -3   14.06    1.13
  -2   3  -3   18.00    1.15
  -2   3  -3   14.57    1.09
   2  -3   3   17.17    1.12
   2  -3   3   13.48    1.10
   2  -3   3   13.47    1.09
  -1   4  -6    0.32    0.31
  -1   4  -6    1.16    0.32
  -1   4  -6    1.18    0.35
   1  -4   6    0.93    0.33
   1  -4   6    0.93    0.30
   1  -4   6    0.79    0.32
   0   5  -9    7.58    0.98
   0   5  -9    9.12    0.96
   0   5  -9    8.94    0.98
   0  -5   9   10.70    0.97
   0  -5   9    8.94    0.94
   0  -5   9    9.10    1.05
   1   6 -12    0.16    0.51
   1   6 -12   -0.02    0.49
   1   6 -12   -0.47    0.44
  -1  -6  12    0.41    0.51
  -1  -6  12    0.32    0.47
  -1  -6  12    0.50    0.51
  -6  -2  11    1.21    0.64
  -6  -2  11    2.56    0.58
  -6  -2  11    1.86    0.59
   6   2 -11    2.53    0.71
   6   2 -11    2.90    0.70
  -5  -1   8   20.63    1.45
  -5  -1   8   15.00    1.53
  -5  -1   8   19.44    1.48
   5   1  -8   17.07    1.55
   5   1  -8   19.17    1.52
  -4   0   5    0.35    0.29
  -4   0   5    0.47    0.28
   4   0  -5    0.27    0.28
   4   0  -5    0.24    0.29
  -3   1   2  226.62   14.03
  -3   1   2  214.86   13.97
  -3   1   2  214.68   14.00
   3  -1  -2  208.79   13.99
   3  -1  -2  221.25   14.02
  -2   2  -1   43.68    3.06
  -2   2  -1   52.41    3.07
   2  -2   1   43.85    3.03
   2  -2   1   49.46    3.06
   2  -2   1   42.41    3.04
  -1   3  -4    3.37    0.42
  -1   3  -4    3.64    0.44
  -1   3  -4    2.88    0.38
   1  -3   4    3.32    0.43
   1  -3   4    3.17    0.39
   1  -3   4    2.74    0.39
   0   4  -7   13.60    1.06
   0   4  -7   12.60    1.08
   0   4  -7   12.22    1.11
   0  -4   7   12.94    1.06
   0  -4   7   11.56    1.09
   1   5 -10   -0.33    0.40
   1   5 -10    1.65    0.53
   1   5 -10    0.32    0.43
  -1  -5  10    1.07    0.52
  -1  -5  10    1.30    0.48
  -1  -5  10    0.96    0.45
   2   6 -13    0.15    0.48
   2   6 -13    0.26    0.55
   2   6 -13    0.13    0.52
  -2  -6  13    0.32    0.55
  -2  -6  13   -0.09    0.45
  -2  -6  13   -0.61    0.50
  -5  -2  10   16.80    1.30
  -5  -2  10   14.92    1.49
  -5  -2  10   14.41    1.35
   5   2 -10   17.47    1.51
   5   2 -10   14.56    1.42
   5   2 -10   13.29    1.42
  -4  -1   7    2.48    0.52
  -4  -1   7    1.60    0.42
  -4  -1   7    2.17    0.44
   4   1  -7    2.15    0.46
   4   1  -7    1.90    0.50
  -3   0   4    1.28    0.34
  -3   0   4    1.82    0.32
   3   0  -4    1.34    0.31
   3   0  -4    1.50    0.34
  -2   1   1    0.88    0.24
  -2   1   1    1.01    0.20
  -2   1   1    0.89    0.22
   2  -1  -1    0.84    0.20
   2  -1  -1    1.08    0.23
  -1   2  -2   20.96    1.52
  -1   2  -2   25.34    1.54
  -1   2  -2   20.30    1.50
   1  -2   2   20.35    1.51
   1  -2   2   26.26    1.54
   1  -2   2   20.61    1.50
   0   3  -5    4.61    0.50
   0   3  -5    4.34    0.56
   0   3  -5    4.84    0.53
   0  -3   5    3.72    0.51
   0  -3   5    4.14    0.51
   1   4  -8   36.97    2.90
   1   4  -8   43.18    2.88
   1   4  -8   42.25    2.87
  -1  -4   8   42.59    2.87
  -1  -4   8   39.09    2.92
   2   5 -11    7.33    0.94
   2   5 -11    6.76    0.90
   2   5 -11    6.87    0.98
  -2  -5  11    5.89    0.86
  -2  -5  11    4.85    0.90
  -2  -5  11    7.10    0.86
  -5  -3  12    1.63    0.57
  -5  -3  12    1.28    0.66
   5   3 -12    1.87    0.68
   5   3 -12    1.17    0.62
  -4  -2   9   11.34    1.00
  -4  -2   9   10.78    1.19
  -4  -2   9   11.42    1.11
   4   2  -9   13.13    1.18
   4   2  -9   12.95    1.22
  -3  -1   6    1.49    0.33
  -3  -1   6    0.50    0.32
  -3  -1   6    1.70    0.35
   3   1  -6    1.09    0.38
   3   1  -6    1.18    0.34
  -2   0   3   47.46    3.19
  -2   0   3   49.19    3.24
   2   0  -3   49.31    3.23
   2   0  -3   48.18    3.20
  -1   1   0   32.15    2.23
  -1   1   0   35.50    2.23
   1  -1   0   34.44    2.23
   1  -1   0   33.01    2.22
   0   2  -3  337.89   20.49
   0   2  -3  303.11   20.45
   0   2  -3  308.13   20.46
   0  -2   3  335.21   20.49
   0  -2   3  307.60   20.45
   1   3  -6    5.21    0.66
   1   3  -6    5.16    0.60
   1   3  -6    4.93    0.59
  -1  -3   6    5.45    0.61
  -1  -3   6    6.14    0.68
   2   4  -9   -0.11    0.37
   2   4  -9   -0.07    0.40
   2   4  -9    0.20    0.42
  -2  -4   9    0.37    0.43
  -2  -4   9   -0.06    0.37
   3   5 -12    1.10    0.59
   3   5 -12    1.94    0.59
   3   5 -12    1.10    0.55
  -3  -5  12    0.50    0.47
  -3  -5  12    1.52    0.61
  -3  -5  12    0.30    0.53
  -4  -3  11    2.91    0.72
  -4  -3  11    2.82    0.62
   4   3 -11    2.02    0.63
   4   3 -11    2.86    0.69
   4   3 -11    3.92    0.76
  -3  -2   8    0.08    0.25
  -3  -2   8    0.33    0.36
  -3  -2   8    0.11    0.36
   3   2  -8    0.10    0.35
   3   2  -8    0.13    0.35
   3   2  -8   -0.02    0.33
  -2  -1   5    0.09    0.20
  -2  -1   5    0.13    0.25
  -2  -1   5    0.01    0.26
   2   1  -5    0.15    0.27
   2   1  -5    0.17    0.24
  -1   0   2  231.24   14.74
  -1   0   2  224.67   14.70
   1   0  -2  223.83   14.72
   1   0  -2  236.92   14.74
   0   1  -1    2.35    0.34
   0   1  -1    2.90    0.33
   0   1  -1    3.78    0.34
   0  -1   1    2.51    0.32
   0  -1   1    4.12    0.34
   0  -1   1    2.71    0.32
   1   2  -4    1.67    0.31
   1   2  -4    0.69    0.28
   1   2  -4    0.88    0.26
  -1  -2   4    0.93    0.26
  -1  -2   4    1.52    0.33
   2   3  -7    2.21    0.47
   2   3  -7    2.85    0.48
   2   3  -7    2.97    0.50
  -2  -3   7    1.83    0.46
  -2  -3   7    2.85    0.45
   3   4 -10   24.75    2.05
   3   4 -10   27.07    2.01
   3   4 -10   23.65    1.99
  -3  -4  10   24.39    2.05
  -3  -4  10   25.50    1.94
  -4  -4  13    1.44    0.64
  -4  -4  13    1.41    0.66
   4   4 -13    0.85    0.60
   4   4 -13    1.21    0.61
  -3  -3  10    9.64    1.08
  -3  -3  10    7.19    0.86
   3   3 -10    7.45    0.91
   3   3 -10    5.29    0.89
   3   3 -10    6.81    0.89
  -2  -2   7    2.85    0.36
  -2  -2   7    2.01    0.43
  -2  -2   7    2.08    0.48
   2   2  -7    2.59    0.49
   2   2  -7    2.40    0.45
   2   2  -7    3.21    0.48
  -1  -1   4    3.91    0.38
  -1  -1   4    3.31    0.42
  -1  -1   4    4.77    0.49
   1   1  -4    3.41    0.42
   1   1  -4    5.10    0.53
   0   0   1   14.82    0.94
   0   0  -1   12.70    0.93
   0   0  -1   14.77    0.94
   1   1  -2  140.29    8.32
   1   1  -2  120.43    8.30
  -1  -1   2  122.78    8.29
  -1  -1   2  144.67    8.33
  -1  -1   2  116.28    8.29
   2   2  -5    6.65    0.66
   2   2  -5    6.60    0.70
  -2  -2   5    7.79    0.65
  -2  -2   5    8.04    0.62
  -2  -2   5    6.62    0.71
   3   3  -8    0.60    0.41
   3   3  -8    0.68    0.42
   3   3  -8    1.13    0.46
  -3  -3   8    0.60    0.38
  -3  -3   8    1.29    0.49
   4   4 -11    1.58    0.58
   4   4 -11    0.75    0.56
  -4  -4  11    0.43    0.53
  -4  -4  11    1.07    0.52
  -3  -4  12    0.24    0.51
  -3  -4  12   -0.20    0.44
   3   4 -12    0.68    0.55
   3   4 -12    0.58    0.48
   3   4 -12   -0.39    0.44
  -2  -3   9    0.65    0.43
  -2  -3   9    0.75    0.41
   2   3  -9    0.09    0.35
   2   3  -9    0.28    0.39
   2   3  -9    0.14    0.41
  -1  -2   6   19.39    1.49
  -1  -2   6   21.06    1.53
   1   2  -6   22.35    1.56
   1   2  -6   19.52    1.48
   1   2  -6   19.52    1.48
   0  -1   3   55.64    3.49
   0  -1   3   49.69    3.47
   0   1  -3   55.10    3.51
   0   1  -3   50.96    3.47
   0   1  -3   53.08    3.46
  -1   0   0   28.97    1.94
  -1   0   0   29.13    1.93
   2   1  -3   21.38    1.65
   2   1  -3   25.27    1.64
  -2  -1   3   25.91    1.63
  -2  -1   3   22.59    1.66
  -2  -1   3   24.41    1.62
   3   2  -6    0.35    0.31
   3   2  -6    0.93    0.34
  -3  -2   6    0.59    0.29
  -3  -2   6    0.26    0.31
  -3  -2   6    0.51    0.27
   4   3  -9   -0.22    0.39
   4   3  -9    0.35    0.42
   4   3  -9   -0.05    0.42
  -4  -3   9   -0.28    0.35
  -4  -3   9    0.20    0.34
  -4  -3   9   -0.11    0.40
   5   4 -12    2.59    0.76
   5   4 -12    3.17    0.78
  -5  -4  12    3.81    0.72
  -5  -4  12    2.63    0.74
  -5  -4  12    2.44    0.61
  -2  -4  11    2.29    0.64
  -2  -4  11    2.90    0.63
   2   4 -11    2.47    0.67
   2   4 -11    3.13    0.62
   2   4 -11    2.65    0.62
  -1  -3   8    8.32    0.91
  -1  -3   8    8.98    0.87
   1   3  -8    9.99    0.89
   1   3  -8    9.29    0.86
   1   3  -8    7.66    0.93
   0  -2   5   15.96    1.21
   0  -2   5   15.11    1.23
   0   2  -5   16.48    1.24
   0   2  -5   17.10    1.20
   0   2  -5   17.17    1.19
   1  -1   2   26.29    1.73
   1  -1   2   26.06    1.73
  -1   1  -2   26.42    1.72
  -1   1  -2   25.64    1.69
  -1   1  -2   25.18    1.74
  -1   1  -2   26.42    1.71
   2   0  -1    0.49    0.15
   2   0  -1    0.25    0.16
  -2   0   1    0.05    0.19
  -2   0   1    0.26    0.21
  -2   0   1    0.06    0.16
   3   1  -4   19.93    1.42
   3   1  -4   18.53    1.46
  -3  -1   4   19.72    1.48
  -3  -1   4   21.27    1.42
  -3  -1   4   20.20    1.40
   4   2  -7    2.49    0.50
   4   2  -7    1.99    0.49
  -4  -2   7    1.31    0.49
  -4  -2   7    3.19    0.47
  -4  -2   7    2.65    0.46
   5   3 -10   35.65    2.56
   5   3 -10   33.16    2.57
  -5  -3  10   33.53    2.45
  -5  -3  10   33.65    2.41
  -5  -3  10   29.83    2.59
  -2  -5  13   -0.02    0.52
  -2  -5  13   -0.74    0.47
  -2  -5  13   -0.53    0.45
   2   5 -13    0.03    0.52
   2   5 -13   -0.25    0.47
   2   5 -13    0.60    0.50
  -1  -4  10    0.92    0.47
  -1  -4  10   -0.23    0.38
   1   4 -10    0.54    0.48
   1   4 -10    0.50    0.40
   1   4 -10    0.24    0.39
   0  -3   7    2.72    0.47
   0  -3   7    3.32    0.51
   0   3  -7    3.42    0.55
   0   3  -7    3.45    0.47
   0   3  -7    2.41    0.45
   1  -2   4   -0.01    0.23
   1  -2   4    0.26    0.19
  -1   2  -4   -0.02    0.18
  -1   2  -4    0.55    0.25
  -1   2  -4    0.00    0.20
   2  -1   1    2.59    0.29
   2  -1   1    2.98    0.31
  -2   1  -1    3.26    0.35
  -2   1  -1    3.71    0.34
  -2   1  -1    3.48    0.38
   3   0  -2   42.67    2.85
   3   0  -2   45.36    2.89
  -3   0   2   42.48    2.87
  -3   0   2   43.85    2.88
  -3   0   2   41.99    2.89
   4   1  -5    0.57    0.32
   4   1  -5    0.68    0.29
  -4  -1   5    0.36    0.31
  -4  -1   5    0.01    0.24
  -4  -1   5   -0.43    0.27
   5   2  -8    6.28    0.83
   5   2  -8    5.31    0.79
  -5  -2   8    6.87    0.77
  -5  -2   8    5.53    0.84
  -5  -2   8    7.58    0.79
   6   3 -11    0.55    0.56
   6   3 -11    0.33    0.57
  -6  -3  11    0.52    0.48
  -6  -3  11    0.93    0.52
  -6  -3  11    0.78    0.56
  -1  -5  12   -0.28    0.45
  -1  -5  12    0.06    0.48
   1   5 -12    0.57    0.47
   1   5 -12   -0.26    0.47
   1   5 -12    0.18    0.43
   0  -4   9    0.18    0.34
   0  -4   9   -0.22    0.35
   0   4  -9    0.16    0.42
   0   4  -9    0.28    0.35
   0   4  -9    0.43    0.37
   1  -3   6   64.19    4.13
   1  -3   6   60.31    4.11
  -1   3  -6   64.97    4.17
  -1   3  -6   58.04    4.08
  -1   3  -6   60.37    4.08
   2  -2   3    0.12    0.17
   2  -2   3    0.01    0.20
  -2   2  -3   -0.02    0.16
  -2   2  -3   -0.36    0.14
  -2   2  -3    0.03    0.20
  -2   2  -3   -0.24    0.19
   3  -1   0   63.42    4.27
  -3   1   0   64.97    4.25
  -3   1   0   63.86    4.32
  -3   1   0   63.58    4.31
  -3   1   0   73.50    4.30
   4   0  -3   26.16    1.86
   4   0  -3   28.49    1.90
  -4   0   3   26.20    1.86
  -4   0   3   27.42    1.91
  -4   0   3   26.93    1.88
   5   1  -6    1.50    0.40
   5   1  -6    0.51    0.35
  -5  -1   6    0.91    0.43
  -5  -1   6    1.63    0.41
  -5  -1   6    1.39    0.36
   6   2  -9    0.65    0.48
  -6  -2   9    0.28    0.47
  -6  -2   9    1.10    0.46
  -6  -2   9    0.46    0.44
   0  -5  11    0.38    0.47
   0  -5  11    0.47    0.43
   0   5 -11    0.54    0.44
   0   5 -11    1.19    0.54
   0   5 -11    0.88    0.44
   1  -4   8    7.11    0.78
   1  -4   8    7.17    0.77
  -1   4  -8    7.09    0.75
  -1   4  -8    4.41    0.74
  -1   4  -8    7.97    0.75
   2  -3   5    2.12    0.38
   2  -3   5    1.78    0.34
  -2   3  -5    1.74    0.37
  -2   3  -5    2.84    0.38
  -2   3  -5    2.51    0.34
   3  -2   2    1.07    0.22
   3  -2   2    1.20    0.22
   3  -2   2    0.52    0.22
  -3   2  -2    1.20    0.30
  -3   2  -2    1.34    0.29
  -3   2  -2    0.89    0.25
  -3   2  -2    1.15    0.25
   4  -1  -1    4.70    0.41
   4  -1  -1    3.31    0.38
  -4   1   1    2.38    0.38
  -4   1   1    4.53    0.48
  -4   1   1    4.81    0.50
   5   0  -4    0.35    0.27
   5   0  -4    0.73    0.29
  -5   0   4    0.83    0.33
  -5   0   4    0.25    0.33
   6   1  -7    1.34    0.63
   6   1  -7    1.74    0.49
  -6  -1   7    0.92    0.50
  -6  -1   7    1.41    0.41
  -6  -1   7    1.03    0.51
   7   2 -10    2.12    0.66
  -7  -2  10    2.19    0.61
  -7  -2  10    0.97    0.59
  -7  -2  10    1.53    0.52
   0  -6  13    1.10    0.58
   0  -6  13    2.04    0.65
   0   6 -13    2.03    0.61
   0   6 -13    1.87    0.69
   0   6 -13    1.66    0.61
   1  -5  10    0.64    0.44
   1  -5  10    0.52    0.41
   1  -5  10    0.59    0.42
  -1   5 -10    0.03    0.37
  -1   5 -10   -0.08    0.41
  -1   5 -10    0.57    0.38
   2  -4   7    8.08    0.78
   2  -4   7    6.30    0.76
  -2   4  -7    6.23    0.70
  -2   4  -7    8.36    0.82
  -2   4  -7    6.96    0.74
   3  -3   4   57.96    3.85
   3  -3   4   58.37    3.85
   3  -3   4   56.64    3.83
  -3   3  -4   58.56    3.88
  -3   3  -4   59.01    3.86
  -3   3  -4   59.22    3.81
  -3   3  -4   56.60    3.80
   4  -2   1   11.47    0.88
   4  -2   1   12.56    0.88
  -4   2  -1    9.49    0.90
  -4   2  -1   12.78    0.94
  -4   2  -1   12.56    0.94
  -4   2  -1   13.30    0.98
  -4   2  -1   12.23    0.83
   5  -1  -2   14.61    1.05
  -5   1   2   13.75    1.10
  -5   1   2   13.31    1.08
   6   0  -5   -0.04    0.30
   6   0  -5   -0.18    0.27
  -6   0   5    0.01    0.33
  -6   0   5    0.02    0.38
   7   1  -8    1.09    0.51
  -7  -1   8    1.08    0.57
  -7  -1   8    2.05    0.60
  -7  -1   8    2.87    0.53
   1  -6  12    4.22    0.77
   1  -6  12    4.94    0.78
  -1   6 -12    5.02    0.77
  -1   6 -12    5.65    0.80
  -1   6 -12    3.42    0.79
   2  -5   9    1.28    0.45
   2  -5   9    1.13    0.46
   2  -5   9    0.94    0.44
  -2   5  -9    0.71    0.42
  -2   5  -9    1.25    0.41
  -2   5  -9    0.86    0.44
   3  -4   6   29.02    1.96
   3  -4   6   28.18    1.99
   3  -4   6   26.09    1.96
  -3   4  -6   29.18    1.97
  -3   4  -6   26.20    2.01
  -3   4  -6   27.14    1.93
   4  -3   3    5.09    0.54
   4  -3   3    6.20    0.55
   4  -3   3    5.57    0.56
  -4   3  -3    7.23    0.61
  -4   3  -3    6.50    0.63
  -4   3  -3    5.27    0.57
   5  -2   0    3.64    0.42
  -5   2   0    3.22    0.47
  -5   2   0    3.07    0.31
  -5   2   0    3.83    0.49
  -5   2   0    2.74    0.41
   6  -1  -3    0.91    0.34
   6  -1  -3    0.57    0.29
  -6   1   3    1.29    0.36
  -6   1   3    0.44    0.37
  -6   1   3    0.25    0.32
   7   0  -6    2.72    0.54
  -7   0   6    3.83    0.66
  -7   0   6    2.27    0.58
   8   1  -9    1.30    0.56
  -8  -1   9    1.95    0.51
  -8  -1   9    1.41    0.61
  -8  -1   9    2.34    0.64
   2  -6  11    3.58    0.67
   2  -6  11    4.22    0.71
  -2   6 -11    2.40    0.66
  -2   6 -11    2.96    0.63
  -2   6 -11    2.30    0.56
   3  -5   8    3.50    0.55
   3  -5   8    2.09    0.47
   3  -5   8    2.31    0.52
  -3   5  -8    2.14    0.46
  -3   5  -8    2.08    0.48
  -3   5  -8    3.32    0.59
   4  -4   5   55.07    3.60
   4  -4   5   56.77    3.58
   4  -4   5   49.48    3.57
  -4   4  -5   53.03    3.64
  -4   4  -5   54.10    3.60
  -4   4  -5   51.73    3.53
   5  -3   2    4.86    0.54
   5  -3   2    5.64    0.54
  -5   3  -2    6.20    0.63
  -5   3  -2    5.75    0.68
  -5   3  -2    6.18    0.61
   6  -2  -1    0.19    0.24
  -6   2   1    0.04    0.14
  -6   2   1   -0.07    0.28
  -6   2   1    0.12    0.26
  -6   2   1   -0.09    0.31
   7  -1  -4    0.80    0.37
  -7   1   4    1.39    0.45
  -7   1   4    1.17    0.47
  -7   1   4    1.13    0.40
   8   0  -7    0.93    0.46
  -8   0   7   -0.04    0.36
  -8   0   7   -0.07    0.41
  -8   0   7    0.64    0.48
   2  -7  13    0.32    0.52
   2  -7  13    0.87    0.57
  -2   7 -13    1.52    0.56
  -2   7 -13    1.37    0.53
  -2   7 -13    0.07    0.55
   3  -6  10    0.28    0.43
   3  -6  10    0.89    0.48
  -3   6 -10    0.87    0.49
  -3   6 -10    0.31    0.44
  -3   6 -10    0.90    0.41
   4  -5   7    0.05    0.35
   4  -5   7   -0.25    0.31
   4  -5   7   -0.06    0.28
  -4   5  -7   -0.51    0.25
  -4   5  -7   -0.45    0.28
  -4   5  -7   -0.35    0.21
  -4   5  -7    0.10    0.39
   5  -4   4   13.59    1.00
   5  -4   4   11.83    1.01
   5  -4   4   12.07    1.00
  -5   4  -4   13.96    1.09
  -5   4  -4   12.55    1.01
  -5   4  -4   11.97    1.07
  -5   4  -4   11.93    1.07
   6  -3   1   13.48    0.99
  -6   3  -1   13.15    1.06
  -6   3  -1   11.37    1.03
  -6   3  -1   12.05    1.10
   7  -2  -2    2.13    0.41
  -7   2   2    1.63    0.44
  -7   2   2    1.00    0.42
  -7   2   2    1.71    0.26
  -7   2   2    1.74    0.45
   8  -1  -5    4.95    0.69
  -8   1   5    4.42    0.74
  -8   1   5    4.69    0.75
   9   0  -8   -0.30    0.45
  -9   0   8    1.31    0.59
  -9   0   8    0.89    0.64
  -9   0   8    0.10    0.52
   3  -7  12    2.08    0.66
   3  -7  12    2.44    0.67
  -3   7 -12    2.56    0.61
  -3   7 -12    1.29    0.66
  -3   7 -12    2.68    0.59
   4  -6   9    0.35    0.41
   4  -6   9   -0.01    0.42
  -4   6  -9    0.19    0.34
  -4   6  -9    0.04    0.40
  -4   6  -9    0.02    0.36
  -4   6  -9    0.11    0.25
   5  -5   6    3.13    0.53
   5  -5   6    3.61    0.55
   5  -5   6    3.67    0.51
  -5   5  -6    4.71    0.69
  -5   5  -6    3.62    0.48
  -5   5  -6    4.13    0.61
  -6   4  -3    2.57    0.51
  -6   4  -3    2.39    0.45
  -6   4  -3    2.16    0.44
   7  -3   0    0.35    0.30
  -7   3   0    0.51    0.34
  -7   3   0    0.78    0.39
  -7   3   0    0.51    0.16
  -7   3   0    0.48    0.42
   8  -2  -3    0.65    0.37
  -8   2   3    0.56    0.44
  -8   2   3    0.57    0.40
  -8   2   3    0.68    0.39
   9  -1  -6    1.39    0.50
  -9   1   6    1.03    0.56
  -9   1   6    0.75    0.52
   4  -7  11    0.09    0.48
   4  -7  11   -0.27    0.42
  -4   7 -11    0.35    0.52
  -4   7 -11    1.52    0.50
  -4   7 -11    1.16    0.49
   5  -6   8    2.79    0.57
   5  -6   8    2.37    0.55
  -5   6  -8    2.64    0.41
  -5   6  -8    2.52    0.54
  -5   6  -8    1.76    0.55
   6  -5   5    4.68    0.62
   6  -5   5    4.81    0.60
  -6   5  -5    3.84    0.66
  -6   5  -5    4.52    0.59
  -6   5  -5    4.79    0.66
  -6   5  -5    5.48    0.72
   7  -4   2    8.59    0.76
  -7   4  -2    5.27    0.78
  -7   4  -2    8.50    0.85
  -7   4  -2    8.14    0.91
   8  -3  -1   10.58    0.98
  -8   3   1    9.72    1.09
  -8   3   1   10.97    0.82
  -8   3   1   12.02    1.07
  -8   3   1   10.33    1.07
   9  -2  -4    2.98    0.53
  -9   2   4    2.50    0.56
  -9   2   4    2.18    0.58
  -9   2   4    1.50    0.53
  10  -1  -7    0.81    0.53
 -10   1   7    1.09    0.60
 -10   1   7    0.56    0.54
   5  -7  10    0.64    0.50
   5  -7  10    0.56    0.46
  -5   7 -10    0.91    0.55
  -5   7 -10    0.88    0.39
  -5   7 -10    0.46    0.46
   6  -6   7    0.63    0.39
   6  -6   7    0.42    0.38
  -6   6  -7   -0.53    0.26
  -6   6  -7   -0.41    0.35
  -6   6  -7   -0.71    0.31
   7  -5   4    5.59    0.63
   7  -5   4    5.56    0.66
  -7   5  -4    4.74    0.64
  -7   5  -4    5.08    0.72
  -7   5  -4    5.13    0.73
  -7   5  -4    2.91    0.62
   8  -4   1   12.78    1.05
  -8   4  -1   11.33    1.11
  -8   4  -1   10.51    1.10
  -8   4  -1   12.85    1.18
   9  -3  -2    2.18    0.51
  -9   3   2    2.43    0.59
  -9   3   2    3.17    0.63
  -9   3   2    2.65    0.61
  10  -2  -5    2.08    0.60
 -10   2   5    1.57    0.63
 -10   2   5    1.12    0.56
   5  -8  12    0.96    0.56
   5  -8  12   -0.64    0.46
  -5   8 -12    1.87    0.59
  -5   8 -12    0.47    0.63
  -5   8 -12    0.93    0.45
   6  -7   9    0.38    0.45
   6  -7   9    0.10    0.43
  -6   7  -9   -0.17    0.40
  -6   7  -9    0.49    0.48
   7  -6   6   51.33    3.54
   7  -6   6   51.75    3.55
  -7   6  -6   51.25    3.60
  -7   6  -6   52.24    3.64
  -7   6  -6   52.87    3.51
  -7   6  -6   47.19    3.61
   8  -5   3    6.81    0.74
  -8   5  -3    5.60    0.82
  -8   5  -3    6.57    0.76
  -8   5  -3    3.30    0.69
   9  -4   0    2.21    0.50
  -9   4   0    3.67    0.66
  -9   4   0    3.07    0.62
  -9   4   0    3.03    0.62
  10  -3  -3    0.71    0.47
 -10   3   3    0.33    0.45
 -10   3   3    0.11    0.42
 -10   3   3    1.06    0.53
   6  -8  11    3.65    0.73
   6  -8  11    2.18    0.66
  -6   8 -11    2.59    0.73
  -6   8 -11    2.32    0.61
   7  -7   8    7.24    0.87
   7  -7   8    5.86    0.81
  -7   7  -8    4.56    0.81
  -7   7  -8    6.23    0.86
  -7   7  -8    7.52    0.75
  -7   7  -8    4.25    0.77
   8  -6   5    2.92    0.57
   8  -6   5    3.39    0.57
  -8   6  -5    2.78    0.66
  -8   6  -5    2.29    0.58
  -8   6  -5    3.60    0.59
  -8   6  -5    2.76    0.61
   9  -5   2   -0.08    0.40
  -9   5  -2   -0.19    0.36
  -9   5  -2   -0.31    0.41
  -9   5  -2    0.43    0.43
 -10   4   1    0.13    0.41
 -10   4   1   -0.34    0.43
 -10   4   1    1.05    0.55
 -11   3   4   -0.62    0.46
 -11   3   4   -0.09    0.43
 -11   3   4   -0.73    0.47
   7  -8  10    3.81    0.75
   7  -8  10    5.33    0.79
  -7   8 -10    1.96    0.64
  -7   8 -10    3.84    0.84
  -7   8 -10    5.04    0.81
   8  -7   7    7.62    0.93
   8  -7   7    9.30    1.01
  -8   7  -7    9.40    1.04
  -8   7  -7    7.23    1.03
  -8   7  -7    6.22    0.97
  -8   7  -7    7.19    0.86
   9  -6   4    1.38    0.47
  -9   6  -4    1.56    0.55
  -9   6  -4    1.81    0.61
  -9   6  -4    1.92    0.52
 -10   5  -1    2.10    0.62
 -10   5  -1    2.37    0.62
 -10   5  -1    1.46    0.54
 -11   4   2    0.26    0.48
 -11   4   2    0.22    0.48
 -11   4   2    0.22    0.52
   8  -8   9    0.86    0.50
   8  -8   9    0.12    0.44
  -8   8  -9    0.23    0.50
  -8   8  -9   -0.33    0.45
  -8   8  -9   -0.29    0.47
   9  -7   6    2.09    0.51
  -9   7  -6    1.98    0.61
  -9   7  -6    0.98    0.52
  -9   7  -6    1.35    0.47
  -9   7  -6    1.13    0.58
 -10   6  -3    1.72    0.56
 -10   6  -3    1.16    0.59
 -10   6  -3    1.47    0.52
 -11   5   0    0.78    0.58
 -11   5   0   -0.04    0.47
 -11   5   0   -0.46    0.39
   9  -8   8   -0.29    0.40
  -9   8  -8    0.39    0.44
  -9   8  -8    0.25    0.54
  -9   8  -8   -0.20    0.44
  -9   8  -8   -0.33    0.47
 -10   7  -5   -0.02    0.51
 -10   7  -5    0.38    0.46
 -10   7  -5   -0.50    0.42
 -11   6  -2   -0.34    0.47
 -11   6  -2   -0.28    0.52
 -11   6  -2    0.20    0.48
 -11   7  -4    0.92    0.55
 -11   7  -4    0.54    0.59
 -11   7  -1    0.91    0.60
 -11   7  -1    1.02    0.55
 -11   7  -1    0.90    0.58
  11  -7   1    1.74    0.57
 -10   8  -4   -0.61    0.41
 -10   8  -4    0.27    0.55
 -10   8  -4    0.92    0.52
  10  -8   4    0.17    0.49
  -9   9  -7    2.57    0.71
  -9   9  -7    3.21    0.65
  -9   9  -7    3.69    0.83
  -9   9  -7    1.02    0.61
   9  -9   7    3.80    0.74
   9  -9   7    2.49    0.66
 -11   6   1    1.41    0.61
 -11   6   1    0.56    0.52
 -11   6   1    0.53    0.56
  11  -6  -1    0.51    0.52
 -10   7  -2    5.26    0.90
 -10   7  -2    3.32    0.77
 -10   7  -2    3.76    0.75
  10  -7   2    6.25    0.84
  -9   8  -5    2.31    0.69
  -9   8  -5    3.06    0.63
  -9   8  -5    2.81    0.72
   9  -8   5    2.46    0.58
   9  -8   5    3.54    0.66
  -8   9  -8    1.77    0.65
  -8   9  -8    1.30    0.65
  -8   9  -8    1.96    0.54
  -8   9  -8    2.57    0.72
   8  -9   8    2.66    0.60
   8  -9   8    0.84    0.53
 -11   5   3    0.44    0.54
 -11   5   3    1.56    0.65
 -11   5   3    1.66    0.62
  11  -5  -3    0.93    0.56
 -10   6   0    0.05    0.48
 -10   6   0   -0.25    0.41
 -10   6   0    0.16    0.46
  10  -6   0    0.23    0.43
  -9   7  -3   -0.18    0.41
  -9   7  -3   -0.18    0.47
  -9   7  -3   -0.32    0.41
   9  -7   3    0.09    0.46
  -8   8  -6    0.40    0.43
  -8   8  -6    1.14    0.49
  -8   8  -6   -0.70    0.41
  -8   8  -6   -0.04    0.47
  -8   8  -6    0.20    0.53
   8  -8   6    1.29    0.49
   8  -8   6    1.63    0.55
  -7   9  -9    5.95    0.91
  -7   9  -9    2.90    0.80
  -7   9  -9    6.45    0.82
   7  -9   9    7.98    0.98
   7  -9   9    5.95    0.88
 -10   5   2    0.20    0.45
 -10   5   2   -0.02    0.44
 -10   5   2   -0.18    0.46
  10  -5  -2    0.67    0.49
  -9   6  -1    7.31    0.99
  -9   6  -1    8.29    1.03
  -9   6  -1    6.92    0.92
   9  -6   1    8.52    0.94
  -8   7  -4    0.69    0.48
  -8   7  -4    0.19    0.52
  -8   7  -4    0.31    0.47
  -8   7  -4    0.73    0.43
   8  -7   4   -0.21    0.35
   8  -7   4    0.38    0.41
  -7   8  -7   -0.22    0.37
  -7   8  -7   -0.51    0.41
  -7   8  -7    0.36    0.48
   7  -8   7    0.16    0.45
   7  -8   7   -0.17    0.41
  -6   9 -10   -0.16    0.47
   6  -9  10    0.59    0.52
 -10   4   4    0.40    0.50
 -10   4   4    0.40    0.48
 -10   4   4   -0.18    0.43
  10  -4  -4   -0.25    0.46
  -9   5   1    3.59    0.66
  -9   5   1    3.42    0.62
  -9   5   1    1.73    0.58
   9  -5  -1    2.91    0.58
  -8   6  -2    4.37    0.74
  -8   6  -2    5.84    0.75
  -8   6  -2    4.05    0.70
   8  -6   2    5.50    0.74
  -7   7  -5    0.82    0.48
  -7   7  -5    0.46    0.45
  -7   7  -5    0.10    0.37
  -7   7  -5    0.15    0.42
   7  -7   5    0.41    0.39
   7  -7   5    0.34    0.41
  -6   8  -8   -0.20    0.46
  -6   8  -8    0.32    0.45
  -6   8  -8   -0.52    0.32
   6  -8   8    0.68    0.48
   6  -8   8   -0.12    0.42
  -5   9 -11   -1.16    0.37
  -5   9 -11    0.18    0.57
  -5   9 -11    0.46    0.55
   5  -9  11    0.66    0.52
   5  -9  11    0.93    0.58
 -10   3   6    0.38    0.50
 -10   3   6    0.31    0.52
  10  -3  -6    1.45    0.60
  -9   4   3    1.69    0.55
  -9   4   3    1.54    0.54
  -9   4   3    2.41    0.53
   9  -4  -3    1.72    0.53
  -8   5   0   -0.07    0.41
  -8   5   0    0.72    0.43
  -8   5   0    0.12    0.38
   8  -5   0    0.84    0.40
  -7   6  -3    6.16    0.86
  -7   6  -3    7.48    0.94
  -7   6  -3    5.88    0.76
  -7   6  -3    6.55    0.83
   7  -6   3    5.43    0.72
   7  -6   3    7.94    1.01
   7  -6   3    8.01    0.82
  -6   7  -6    1.37    0.43
  -6   7  -6    1.29    0.54
  -6   7  -6    1.98    0.56
   6  -7   6    2.19    0.52
   6  -7   6    2.01    0.51
  -5   8  -9    1.14    0.54
  -5   8  -9    0.43    0.50
  -5   8  -9    0.92    0.43
   5  -8   9    0.15    0.46
   5  -8   9    0.35    0.45
   4  -9  12    1.18    0.56
  -9   3   5    3.31    0.65
  -9   3   5    2.15    0.58
   9  -3  -5    2.15    0.60
  -8   4   2    5.33    0.76
  -8   4   2    6.56    0.74
  -8   4   2    5.32    0.78
   8  -4  -2    6.22    0.76
  -7   5  -1   -0.32    0.36
  -7   5  -1   -0.46    0.36
  -7   5  -1    0.25    0.37
   7  -5   1   -0.13    0.27
   7  -5   1    0.43    0.34
  -6   6  -4    3.88    0.63
  -6   6  -4    3.83    0.64
  -6   6  -4    2.49    0.51
  -6   6  -4    3.29    0.65
   6  -6   4    4.16    0.60
   6  -6   4    3.77    0.58
   6  -6   4    3.51    0.55
  -5   7  -7    7.97    0.95
  -5   7  -7    7.42    0.80
  -5   7  -7    6.68    0.93
   5  -7   7    5.45    0.81
   5  -7   7    7.41    0.84
   5  -7   7    9.37    0.94
  -4   8 -10    3.51    0.77
  -4   8 -10    4.66    0.73
  -4   8 -10    3.50    0.71
   4  -8  10    3.68    0.70
   4  -8  10    4.07    0.74
  -9   2   7   -0.52    0.43
  -9   2   7   -0.55    0.44
   9  -2  -7   -0.63    0.42
  -8   3   4    2.33    0.56
  -8   3   4    1.58    0.42
  -8   3   4    1.22    0.51
   8  -3  -4    1.27    0.47
  -7   4   1   11.76    1.10
  -7   4   1    9.52    1.00
  -7   4   1   12.66    1.11
   7  -4  -1   10.79    0.99
   7  -4  -1   12.35    1.03
  -6   5  -2    1.40    0.44
  -6   5  -2    2.27    0.47
  -6   5  -2    2.00    0.54
  -6   5  -2    1.71    0.44
   6  -5   2    2.12    0.40
   6  -5   2    2.98    0.47
   6  -5   2    1.46    0.39
  -5   6  -5    1.05    0.46
  -5   6  -5    0.01    0.36
   5  -6   5    0.65    0.36
   5  -6   5    0.94    0.39
   5  -6   5    0.83    0.34
  -4   7  -8    2.06    0.50
  -4   7  -8    1.37    0.50
  -4   7  -8    0.48    0.48
   4  -7   8    1.32    0.48
   4  -7   8    1.46    0.47
   4  -7   8    0.20    0.42
  -3   8 -11   12.62    1.62
  -3   8 -11   17.78    1.54
  -3   8 -11   16.19    1.48
   3  -8  11   18.36    1.53
   3  -8  11   16.54    1.57
  -9   1   9    0.00    0.52
  -9   1   9    0.12    0.51
   9  -1  -9    0.30    0.53
  -8   2   6    7.87    0.94
  -8   2   6    5.59    0.88
   8  -2  -6    6.56    0.84
  -7   3   3   10.57    1.00
  -7   3   3    8.76    0.99
  -7   3   3    9.11    0.89
   7  -3  -3    7.91    0.90
   7  -3  -3   11.43    0.96
  -6   4   0    0.36    0.31
  -6   4   0    0.55    0.32
  -6   4   0    0.63    0.37
   6  -4   0    0.78    0.32
   6  -4   0    0.33    0.29
  -5   5  -3    1.94    0.48
  -5   5  -3    1.93    0.45
  -5   5  -3    1.81    0.43
   5  -5   3    2.14    0.40
   5  -5   3    1.22    0.37
   5  -5   3    2.45    0.40
  -4   6  -6    1.33    0.46
  -4   6  -6    1.63    0.42
  -4   6  -6    1.45    0.48
   4  -6   6    1.26    0.42
   4  -6   6    2.00    0.44
   4  -6   6    2.09    0.47
  -3   7  -9    0.57    0.42
  -3   7  -9    0.35    0.46
  -3   7  -9   -0.36    0.40
   3  -7   9   -0.14    0.40
   3  -7   9    0.02    0.35
   3  -7   9   -0.31    0.36
  -2   8 -12   -0.96    0.46
  -2   8 -12    0.47    0.58
  -2   8 -12   -0.57    0.40
   2  -8  12    0.01    0.52
   2  -8  12   -0.03    0.47
  -8   1   8    3.36    0.68
  -8   1   8    2.67    0.70
   8  -1  -8    4.13    0.73
  -7   2   5    0.36    0.39
  -7   2   5    0.94    0.47
   7  -2  -5    0.31    0.34
   7  -2  -5   -0.01    0.37
  -6   3   2   10.90    0.94
  -6   3   2   13.55    1.06
  -6   3   2   10.38    0.99
   6  -3  -2    9.91    0.94
  -5   4  -1   72.81    4.95
  -5   4  -1   73.62    4.90
  -5   4  -1   74.86    4.94
  -5   4  -1   72.51    4.90
   5  -4   1   73.25    4.90
   5  -4   1   76.33    4.89
  -4   5  -4    4.49    0.62
  -4   5  -4    4.49    0.59
  -4   5  -4    5.47    0.55
   4  -5   4    3.94    0.53
   4  -5   4    5.13    0.58
   4  -5   4    4.30    0.57
  -3   6  -7   12.70    1.32
  -3   6  -7   14.39    1.27
  -3   6  -7   17.27    1.34
   3  -6   7   17.88    1.33
   3  -6   7   14.42    1.29
   3  -6   7   16.47    1.29
  -2   7 -10    0.84    0.45
  -2   7 -10    0.86    0.52
  -2   7 -10    0.53    0.51
   2  -7  10    0.82    0.48
   2  -7  10    0.35    0.46
   2  -7  10    0.63    0.44
  -1   8 -13   -0.66    0.42
   1  -8  13    0.88    0.62
  -8   0  10    0.93    0.62
  -8   0  10    0.81    0.60
  -8   0  10    1.99    0.62
   8   0 -10    1.21    0.62
  -7   1   7    4.92    0.71
  -7   1   7    3.89    0.74
   7  -1  -7    4.52    0.69
  -6   2   4   -0.06    0.25
  -6   2   4   -0.16    0.31
  -6   2   4   -0.33    0.35
   6  -2  -4    0.52    0.35
   6  -2  -4   -0.53    0.25
  -5   3   1    7.36    0.76
  -5   3   1    8.99    0.77
  -5   3   1    6.81    0.70
   5  -3  -1    6.86    0.70
   5  -3  -1    8.38    0.73
  -4   4  -2   20.99    1.34
  -4   4  -2   15.76    1.30
  -4   4  -2   16.20    1.30
   4  -4   2   17.79    1.28
   4  -4   2   15.44    1.24
   4  -4   2   15.65    1.23
  -3   5  -5    0.76    0.35
  -3   5  -5    1.77    0.41
  -3   5  -5    0.27    0.27
   3  -5   5    0.03    0.26
   3  -5   5    0.31    0.31
   3  -5   5    0.84    0.32
  -2   6  -8    0.45    0.36
  -2   6  -8   -0.53    0.37
  -2   6  -8    0.24    0.41
   2  -6   8    0.34    0.39
   2  -6   8    0.98    0.40
   2  -6   8   -0.23    0.35
  -1   7 -11    0.45    0.55
  -1   7 -11   -0.22    0.42
  -1   7 -11    0.07    0.45
   1  -7  11    1.08    0.50
   1  -7  11    1.62    0.54
   1  -7  11    0.03    0.53
  -7   0   9    7.35    0.94
  -7   0   9    8.34    1.11
  -7   0   9   10.75    1.06
   7   0  -9    7.45    1.03
  -6   1   6    7.61    0.83
  -6   1   6    5.82    0.84
   6  -1  -6    7.17    0.85
   6  -1  -6    7.53    0.82
  -5   2   3    2.31    0.43
  -5   2   3    1.40    0.40
  -5   2   3    1.74    0.31
   5  -2  -3    1.87    0.40
   5  -2  -3    2.28    0.38
  -4   3   0   11.62    1.05
  -4   3   0   13.41    1.04
  -4   3   0   14.06    1.00
  -4   3   0   13.29    1.01
   4  -3   0   12.16    0.98
   4  -3   0   12.97    1.01
  -3   4  -3    0.46    0.28
  -3   4  -3    0.18    0.29
  -3   4  -3    0.29    0.24
   3  -4   3    0.18    0.25
   3  -4   3    0.38    0.24
   3  -4   3    0.43    0.26
  -2   5  -6    2.76    0.45
  -2   5  -6    2.58    0.49
  -2   5  -6    2.95    0.51
   2  -5   6    2.57    0.45
   2  -5   6    2.73    0.47
   2  -5   6    2.63    0.47
  -1   6  -9   33.87    2.69
  -1   6  -9   37.39    2.61
  -1   6  -9   36.24    2.63
   1  -6   9   37.57    2.64
   1  -6   9   34.46    2.67
   1  -6   9   36.92    2.62
   0   7 -12    4.39    0.77
   0   7 -12    3.07    0.76
   0   7 -12    2.83    0.67
   0  -7  12    2.35    0.74
   0  -7  12    3.64    0.66
   0  -7  12    3.27    0.74
  -7  -1  11   14.26    1.26
  -7  -1  11   13.14    1.32
  -7  -1  11   11.78    1.48
   7   1 -11   13.12    1.44
  -6   0   8   43.98    3.14
  -6   0   8   40.82    2.96
   6   0  -8   43.03    3.03
   6   0  -8   41.25    3.09
  -5   1   5   -0.23    0.33
  -5   1   5    0.12    0.34
   5  -1  -5    0.55    0.32
   5  -1  -5    0.06    0.30
  -4   2   2   15.70    1.16
  -4   2   2   13.66    1.10
  -4   2   2   18.55    1.21
   4  -2  -2   13.15    1.13
   4  -2  -2   16.65    1.17
  -3   3  -1    1.97    0.33
  -3   3  -1    0.62    0.29
   3  -3   1    1.08    0.28
   3  -3   1    1.88    0.31
  -2   4  -4    0.08    0.22
  -2   4  -4    0.17    0.28
  -2   4  -4   -0.01    0.26
   2  -4   4    0.23    0.23
   2  -4   4   -0.10    0.23
   2  -4   4    0.62    0.27
  -1   5  -7    2.49    0.49
  -1   5  -7    2.42    0.51
  -1   5  -7    2.95    0.51
   1  -5   7    2.15    0.45
   1  -5   7    2.68    0.50
   1  -5   7    2.76    0.51
   0   6 -10    0.49    0.45
   0   6 -10    0.73    0.42
   0   6 -10    0.23    0.44
   0  -6  10    0.48    0.45
   0  -6  10    0.62    0.42
   0  -6  10    0.18    0.42
   1   7 -13    2.63    0.69
   1   7 -13    2.69    0.73
   1   7 -13    1.78    0.70
  -1  -7  13    3.44    0.76
  -1  -7  13    2.61    0.79
  -1  -7  13    3.66    0.71
  -6  -1  10    1.76    0.58
  -6  -1  10    3.42    0.61
  -6  -1  10    1.36    0.61
   6   1 -10    1.67    0.62
  -5   0   7    0.29    0.41
  -5   0   7    1.16    0.40
   5   0  -7    0.39    0.40
   5   0  -7    0.73    0.37
  -4   1   4   13.24    0.99
  -4   1   4   11.98    1.02
   4  -1  -4   12.27    0.98
   4  -1  -4   11.40    1.01
  -3   2   1  279.51   18.73
  -3   2   1  285.17   18.70
  -3   2   1  297.77   18.76
   3  -2  -1  289.64   18.72
   3  -2  -1  303.40   18.76
  -2   3  -2    0.85    0.28
  -2   3  -2    0.53    0.22
  -2   3  -2    0.62    0.24
   2  -3   2    0.50    0.23
   2  -3   2    0.39    0.21
   2  -3   2    0.07    0.22
  -1   4  -5    3.44    0.49
  -1   4  -5    3.90    0.48
  -1   4  -5    4.21    0.53
   1  -4   5    3.22    0.47
   1  -4   5    3.73    0.47
   1  -4   5    4.32    0.54
   0   5  -8   14.72    1.21
   0   5  -8   12.77    1.13
   0   5  -8   10.50    1.12
   0  -5   8   11.88    1.14
   0  -5   8   12.25    1.11
   0  -5   8   12.82    1.11
   1   6 -11    6.93    0.91
   1   6 -11    6.25    0.98
   1   6 -11    6.91    0.94
  -1  -6  11    6.68    0.87
  -1  -6  11    6.27    0.98
  -1  -6  11    6.24    0.87
  -6  -2  12    4.34    0.80
  -6  -2  12    3.86    0.89
   6   2 -12    4.80    0.88
   6   2 -12    4.27    0.85
  -5  -1   9    5.96    0.78
  -5  -1   9    7.59    0.77
  -5  -1   9    3.39    0.73
   5   1  -9    5.49    0.78
   5   1  -9    5.17    0.85
  -4   0   6    0.01    0.30
  -4   0   6    0.11    0.29
   4   0  -6    0.17    0.31
   4   0  -6    0.11    0.31
  -3   1   3    1.78    0.25
  -3   1   3    1.92    0.33
  -3   1   3    1.78    0.34
   3  -1  -3    2.41    0.38
   3  -1  -3    1.93    0.32
  -2   2   0  209.31   13.18
  -2   2   0  189.80   13.18
   2  -2   0  203.34   13.16
   2  -2   0  215.65   13.19
  -1   3  -3  153.54   10.04
  -1   3  -3  152.17   10.05
  -1   3  -3  151.75   10.02
   1  -3   3  154.19   10.02
   1  -3   3  158.63   10.06
   1  -3   3  160.06   10.03
   0   4  -6    5.34    0.64
   0   4  -6    5.45    0.60
   0   4  -6    5.35    0.62
   0  -4   6    4.33    0.55
   0  -4   6    5.65    0.66
   0  -4   6    4.49    0.57
   1   5  -9   16.35    1.39
   1   5  -9   16.62    1.41
   1   5  -9   15.59    1.42
  -1  -5   9   15.66    1.35
  -1  -5   9   14.16    1.42
  -1  -5   9   18.17    1.37
   2   6 -12   -0.06    0.53
   2   6 -12    0.24    0.51
   2   6 -12   -0.03    0.49
  -2  -6  12    0.46    0.47
  -2  -6  12   -0.67    0.44
  -2  -6  12   -0.87    0.43
  -5  -2  11    2.38    0.69
  -5  -2  11    2.27    0.63
   5   2 -11    1.56    0.65
   5   2 -11    1.61    0.56
   5   2 -11    1.79    0.61
  -4  -1   8    1.96    0.43
  -4  -1   8    1.00    0.47
  -4  -1   8    1.16    0.43
   4   1  -8    1.89    0.49
   4   1  -8    1.97    0.52
  -3   0   5   -0.14    0.24
  -3   0   5    0.21    0.24
   3   0  -5    0.30    0.26
   3   0  -5    0.09    0.26
  -2   1   2   17.00    1.14
  -2   1   2   17.58    1.08
  -2   1   2   14.04    1.17
   2  -1  -2   15.91    1.17
   2  -1  -2   15.91    1.14
  -1   2  -1  358.36   23.57
  -1   2  -1  358.30   23.55
  -1   2  -1  379.15   23.57
   1  -2   1  367.44   23.56
   1  -2   1  379.73   23.57
   1  -2   1  359.67   23.55
   0   3  -4   25.94    1.80
   0   3  -4   26.28    1.81
   0   3  -4   25.66    1.78
   0  -3   4   24.69    1.81
   0  -3   4   25.67    1.77
   0  -3   4   25.81    1.78
   1   4  -7   11.70    0.98
   1   4  -7   10.30    1.02
   1   4  -7   10.33    0.96
  -1  -4   7    9.79    1.01
  -1  -4   7   11.28    0.95
  -1  -4   7   11.05    0.95
   2   5 -10   -0.26    0.41
   2   5 -10    0.29    0.44
   2   5 -10    0.17    0.41
  -2  -5  10   -0.24    0.35
  -2  -5  10    0.47    0.45
  -2  -5  10    0.07    0.45
  -4  -2  10    0.51    0.48
  -4  -2  10    0.81    0.36
  -4  -2  10    0.73    0.46
   4   2 -10    0.67    0.50
   4   2 -10    1.05    0.47
   4   2 -10    0.85    0.48
  -3  -1   7    2.44    0.51
  -3  -1   7    3.04    0.42
  -3  -1   7    2.27    0.46
   3   1  -7    3.24    0.56
   3   1  -7    3.19    0.52
  -2   0   4   10.82    0.89
  -2   0   4   14.26    0.99
   2   0  -4   12.64    0.98
   2   0  -4   11.78    0.93
  -1   1   1    0.45    0.16
  -1   1   1    0.91    0.17
   1  -1  -1    0.50    0.15
   1  -1  -1    0.67    0.17
   0   2  -2  812.62   49.81
   0   2  -2  783.80   49.81
   0   2  -2  754.96   49.78
   0  -2   2  764.90   49.78
   0  -2   2  768.70   49.78
   0  -2   2  776.09   49.81
   1   3  -5   13.54    1.08
   1   3  -5   14.69    1.12
   1   3  -5   13.84    1.11
  -1  -3   5   14.64    1.07
  -1  -3   5   12.01    1.05
  -1  -3   5   14.92    1.13
   2   4  -8   16.99    1.45
   2   4  -8   16.88    1.47
   2   4  -8   17.85    1.44
  -2  -4   8   17.37    1.41
  -2  -4   8   19.74    1.53
  -2  -4   8   16.99    1.40
   3   5 -11    2.11    0.64
   3   5 -11    1.90    0.61
   3   5 -11    1.78    0.61
  -3  -5  11    1.91    0.56
  -3  -5  11    1.60    0.61
  -3  -5  11    2.67    0.58
  -4  -3  12    0.05    0.50
  -4  -3  12   -0.13    0.49
   4   3 -12    0.78    0.60
   4   3 -12   -0.59    0.45
   4   3 -12    0.34    0.52
  -3  -2   9    4.99    0.79
  -3  -2   9    6.30    0.63
  -3  -2   9    6.20    0.77
   3   2  -9    6.82    0.87
   3   2  -9    6.80    0.81
   3   2  -9    6.79    0.81
  -2  -1   6   31.82    1.99
  -2  -1   6   33.71    2.10
  -2  -1   6   25.59    2.09
   2   1  -6   25.46    2.11
   2   1  -6   31.09    2.08
  -1   0   3    0.86    0.19
  -1   0   3    0.87    0.24
   1   0  -3    0.69    0.24
   1   0  -3    0.90    0.22
   0   1   0   40.64    2.58
   0   1   0   39.11    2.59
   0   1   0   40.85    2.60
   0  -1   0   39.26    2.58
   0  -1   0   40.20    2.59
   1   2  -3   11.81    0.90
   1   2  -3   11.63    0.91
   1   2  -3   12.23    0.88
  -1  -2   3   11.90    0.85
  -1  -2   3   10.90    0.85
  -1  -2   3   11.24    0.89
   2   3  -6    0.02    0.29
   2   3  -6   -0.10    0.28
   2   3  -6   -0.07    0.26
  -2  -3   6   -0.01    0.25
  -2  -3   6   -0.01    0.28
   3   4  -9    6.98    0.89
   3   4  -9    6.85    0.90
   3   4  -9    7.70    0.95
  -3  -4   9    6.47    0.80
  -3  -4   9    7.59    0.97
  -3  -4   9    6.14    0.81
   4   5 -12    1.34    0.62
   4   5 -12    1.92    0.66
  -4  -5  12    1.65    0.54
  -4  -5  12    0.35    0.54
  -4  -5  12    1.18    0.56
  -3  -3  11    0.99    0.52
  -3  -3  11   -0.09    0.41
   3   3 -11    0.70    0.47
   3   3 -11    0.44    0.50
   3   3 -11    0.72    0.46
  -2  -2   8   41.08    2.83
  -2  -2   8   43.45    2.98
  -2  -2   8   47.48    3.07
   2   2  -8   40.00    2.95
   2   2  -8   40.61    3.04
   2   2  -8   44.90    2.99
  -1  -1   5   30.32    1.88
  -1  -1   5   24.11    1.73
  -1  -1   5   24.20    1.82
   1   1  -5   23.81    1.81
   1   1  -5   30.06    1.90
   0   0   2   61.76    3.80
   0   0  -2   54.38    3.78
   0   0  -2   59.38    3.81
   1   1  -1   73.02    4.85
   1   1  -1   73.51    4.85
  -1  -1   1   75.29    4.84
  -1  -1   1   74.56    4.87
  -1  -1   1   78.19    4.86
  -1  -1   1   76.83    4.84
   2   2  -4   36.38    2.51
   2   2  -4   39.68    2.56
  -2  -2   4   35.86    2.49
  -2  -2   4   34.38    2.48
  -2  -2   4   40.30    2.57
   3   3  -7   22.10    1.63
   3   3  -7   21.58    1.63
   3   3  -7   21.55    1.59
  -3  -3   7   17.95    1.62
  -3  -3   7   20.68    1.51
  -3  -3   7   19.59    1.52
   4   4 -10    9.51    1.28
   4   4 -10    8.14    1.05
   4   4 -10    7.45    0.99
  -4  -4  10    8.07    1.08
  -4  -4  10    8.43    0.95
  -4  -4  10    8.42    0.97
  -3  -4  13    1.56    0.65
  -3  -4  13    1.74    0.66
   3   4 -13    1.17    0.57
   3   4 -13    1.37    0.66
   3   4 -13    2.08    0.64
  -2  -3  10    1.92    0.55
  -2  -3  10    2.32    0.57
   2   3 -10    2.04    0.60
   2   3 -10    2.13    0.51
   2   3 -10    1.57    0.48
  -1  -2   7   26.49    2.03
  -1  -2   7   28.95    2.02
   1   2  -7   27.34    2.08
   1   2  -7   28.85    2.01
   1   2  -7   28.88    1.99
   0  -1   4  143.02    9.25
   0  -1   4  140.51    9.24
   0   1  -4  143.82    9.21
   0   1  -4  148.00    9.27
   0   1  -4  138.28    9.22
   1   0   1    1.83    0.20
  -1   0  -1    1.72    0.21
  -1   0  -1    2.10    0.25
   2   1  -2   21.63    1.41
   2   1  -2   19.51    1.42
  -2  -1   2   22.05    1.40
  -2  -1   2   19.40    1.43
  -2  -1   2   21.66    1.44
   3   2  -5    1.59    0.34
   3   2  -5    1.47    0.35
  -3  -2   5    1.43    0.36
  -3  -2   5    1.16    0.28
  -3  -2   5    1.28    0.31
   4   3  -8   10.18    1.07
   4   3  -8   11.76    1.09
   4   3  -8   11.64    1.11
  -4  -3   8   11.79    1.00
  -4  -3   8    8.58    1.10
  -4  -3   8   11.22    0.99
   5   4 -11    0.04    0.53
   5   4 -11    0.11    0.51
  -5  -4  11    0.55    0.54
  -5  -4  11    0.39    0.48
  -5  -4  11    0.00    0.42
  -2  -4  12    0.27    0.53
  -2  -4  12    0.40    0.51
   2   4 -12    0.97    0.46
   2   4 -12   -0.02    0.43
   2   4 -12    0.57    0.56
  -1  -3   9   10.01    0.96
  -1  -3   9    8.64    0.97
   1   3  -9    9.96    0.93
   1   3  -9    8.71    0.88
   1   3  -9    8.54    1.01
   0  -2   6   88.01    5.76
   0  -2   6   84.63    5.78
   0   2  -6   88.36    5.74
   0   2  -6   84.98    5.71
   0   2  -6   91.32    5.81
   1  -1   3   64.63    4.24
   1  -1   3   62.59    4.23
  -1   1  -3   68.00    4.26
  -1   1  -3   63.92    4.21
  -1   1  -3   65.54    4.21
  -2   0   0  449.87   26.06
  -2   0   0  378.59   26.09
  -2   0   0  390.86   26.10
   3   1  -3    2.81    0.37
   3   1  -3    3.14    0.36
  -3  -1   3    3.18    0.33
  -3  -1   3    2.21    0.38
  -3  -1   3    3.88    0.43
   4   2  -6    3.10    0.53
   4   2  -6    4.04    0.53
  -4  -2   6    3.69    0.49
  -4  -2   6    3.01    0.55
  -4  -2   6    4.37    0.54
   5   3  -9    1.24    0.56
   5   3  -9    1.95    0.53
  -5  -3   9    1.42    0.48
  -5  -3   9    1.14    0.43
  -5  -3   9    1.01    0.50
  -1  -4  11    0.01    0.42
  -1  -4  11    0.60    0.47
   1   4 -11    0.54    0.47
   1   4 -11    0.96    0.47
   1   4 -11    0.07    0.38
   0  -3   8    0.28    0.34
   0  -3   8    0.65    0.38
   0   3  -8    1.00    0.34
   0   3  -8    0.66    0.33
   0   3  -8    0.98    0.38
   1  -2   5   31.71    2.14
   1  -2   5   31.10    2.15
  -1   2  -5   31.25    2.17
  -1   2  -5   31.59    2.11
  -1   2  -5   30.28    2.12
   2  -1   2   18.83    1.36
  -2   1  -2   19.22    1.35
  -2   1  -2   20.19    1.37
  -2   1  -2   20.30    1.36
  -2   1  -2   21.53    1.36
  -2   1  -2   20.06    1.41
   3   0  -1   27.16    1.80
  -3   0   1   28.84    1.83
  -3   0   1   27.17    1.77
  -3   0   1   26.22    1.85
  -3   0   1   26.49    1.86
   4   1  -4   17.82    1.19
   4   1  -4   13.31    1.14
  -4  -1   4   19.18    1.24
  -4  -1   4   13.17    1.16
  -4  -1   4   13.87    1.10
   5   2  -7    2.36    0.50
   5   2  -7    2.16    0.51
  -5  -2   7    2.15    0.49
  -5  -2   7    2.83    0.59
  -5  -2   7    2.04    0.43
   6   3 -10    0.27    0.54
   6   3 -10   -0.05    0.46
  -6  -3  10    0.60    0.45
  -6  -3  10    0.24    0.51
  -6  -3  10    0.43    0.39
  -6  -3  10   -0.60    0.46
  -1  -5  13   -0.28    0.46
   1   5 -13   -0.11    0.45
   1   5 -13    0.11    0.53
   1   5 -13    0.01    0.45
   0  -4  10    0.63    0.45
   0  -4  10    0.65    0.42
   0   4 -10   -0.25    0.32
   0   4 -10    0.05    0.35
   0   4 -10    0.71    0.49
   1  -3   7    0.30    0.30
   1  -3   7   -0.17    0.23
  -1   3  -7    0.00    0.30
  -1   3  -7    0.29    0.28
  -1   3  -7    0.23    0.25
   2  -2   4   26.05    1.80
   2  -2   4   27.29    1.79
  -2   2  -4   26.00    1.73
  -2   2  -4   26.99    1.83
  -2   2  -4   26.21    1.77
  -2   2  -4   24.57    1.76
   3  -1   1   45.77    3.03
   3  -1   1   47.20    3.03
  -3   1  -1   46.16    3.10
  -3   1  -1   48.62    3.05
  -3   1  -1   46.54    3.04
  -3   1  -1   44.38    3.07
   4   0  -2   95.95    6.55
   4   0  -2  102.97    6.58
  -4   0   2  100.54    6.59
  -4   0   2  110.05    6.61
  -4   0   2   95.60    6.60
   5   1  -5   18.62    1.41
   5   1  -5   19.61    1.44
  -5  -1   5   18.15    1.43
  -5  -1   5   16.73    1.35
  -5  -1   5   20.91    1.52
   6   2  -8   -0.39    0.37
  -6  -2   8    0.06    0.36
  -6  -2   8   -0.32    0.40
  -6  -2   8   -0.15    0.41
   0  -5  12    1.13    0.54
   0  -5  12    2.93    0.70
   0   5 -12    2.69    0.60
   0   5 -12    1.27    0.61
   0   5 -12    2.17    0.57
   1  -4   9    0.78    0.43
   1  -4   9    0.39    0.36
  -1   4  -9    0.70    0.38
  -1   4  -9   -0.10    0.38
  -1   4  -9    0.96    0.35
   2  -3   6    2.61    0.42
   2  -3   6    2.64    0.40
  -2   3  -6    2.07    0.36
  -2   3  -6    2.56    0.37
  -2   3  -6    1.66    0.39
  -2   3  -6    2.24    0.24
   3  -2   3    0.11    0.20
  -3   2  -3    0.34    0.26
  -3   2  -3    0.52    0.21
  -3   2  -3    0.00    0.21
  -3   2  -3    0.14    0.19
   4  -1   0    9.52    0.70
  -4   1   0    9.40    0.78
  -4   1   0    9.68    0.74
  -4   1   0    8.97    0.81
   5   0  -3    9.30    0.75
   5   0  -3    8.39    0.76
  -5   0   3    9.19    0.81
  -5   0   3    9.14    0.81
  -5   0   3    8.80    0.81
   6   1  -6    5.56    0.72
  -6  -1   6    6.55    0.80
  -6  -1   6    5.44    0.81
  -6  -1   6    5.73    0.64
   7   2  -9    2.97    0.67
  -7  -2   9    4.52    0.71
  -7  -2   9    1.27    0.62
  -7  -2   9    3.63    0.62
   1  -5  11    1.09    0.51
   1  -5  11    0.24    0.42
  -1   5 -11    0.86    0.52
  -1   5 -11    0.90    0.43
  -1   5 -11    0.57    0.42
   2  -4   8    0.51    0.34
   2  -4   8    1.64    0.43
  -2   4  -8    0.98    0.38
  -2   4  -8    0.34    0.38
  -2   4  -8    1.32    0.37
   3  -3   5   41.19    2.77
   3  -3   5   40.56    2.79
  -3   3  -5   43.63    2.83
  -3   3  -5   39.45    2.73
  -3   3  -5   41.61    2.77
  -3   3  -5   40.16    2.71
   4  -2   2   29.72    2.13
   4  -2   2   32.57    2.12
  -4   2  -2   31.04    2.16
  -4   2  -2   34.53    2.17
  -4   2  -2   31.19    2.22
   5  -1  -1   21.19    1.45
  -5   1   1   20.16    1.49
  -5   1   1   21.20    1.53
  -5   1   1   20.83    1.37
  -5   1   1   20.56    1.52
   6   0  -4    7.13    0.74
   6   0  -4    7.76    0.74
  -6   0   4    6.57    0.79
  -6   0   4    7.15    0.82
   7   1  -7   -0.26    0.41
  -7  -1   7   -0.12    0.46
  -7  -1   7    0.42    0.36
  -7  -1   7    1.09    0.49
   8   2 -10    0.84    0.61
  -8  -2  10    0.61    0.47
  -8  -2  10    0.41    0.53
  -8  -2  10   -0.49    0.34
  -8  -2  10    1.30    0.60
   1  -6  13    3.12    0.69
   1  -6  13    2.07    0.64
  -1   6 -13    2.55    0.58
  -1   6 -13    1.52    0.57
  -1   6 -13    1.93    0.68
   2  -5  10    0.01    0.36
   2  -5  10    0.35    0.44
   2  -5  10    0.11    0.40
  -2   5 -10   -0.75    0.32
  -2   5 -10   -0.12    0.40
  -2   5 -10   -0.28    0.34
   3  -4   7   15.11    1.16
   3  -4   7   14.41    1.18
  -3   4  -7   14.09    1.11
  -3   4  -7   13.87    1.22
  -3   4  -7   14.22    1.01
  -3   4  -7   13.62    1.12
   4  -3   4   44.79    2.97
   4  -3   4   43.50    2.97
   4  -3   4   46.19    2.95
  -4   3  -4   46.21    2.98
  -4   3  -4   44.72    2.94
  -4   3  -4   39.12    2.98
   5  -2   1   16.05    1.13
  -5   2  -1   14.87    1.18
  -5   2  -1   16.38    1.24
  -5   2  -1   15.75    1.20
   6  -1  -2    6.13    0.59
  -6   1   2    5.17    0.65
  -6   1   2    5.63    0.63
  -6   1   2    5.24    0.44
  -6   1   2    4.58    0.62
   7   0  -5   11.85    1.08
  -7   0   5   11.56    1.16
  -7   0   5   12.74    1.15
   8   1  -8    0.37    0.47
  -8  -1   8    0.60    0.38
  -8  -1   8   -0.53    0.48
  -8  -1   8   -0.53    0.44
   2  -6  12   -1.05    0.38
   2  -6  12   -0.28    0.45
  -2   6 -12    0.44    0.42
  -2   6 -12    0.15    0.47
  -2   6 -12   -0.01    0.41
   3  -5   9    1.38    0.44
   3  -5   9    1.03    0.40
   3  -5   9    0.98    0.47
  -3   5  -9    0.76    0.46
  -3   5  -9    1.49    0.41
  -3   5  -9    1.37    0.41
   4  -4   6    0.65    0.32
   4  -4   6    0.26    0.25
   4  -4   6    0.37    0.28
  -4   4  -6    0.27    0.22
  -4   4  -6   -0.06    0.30
  -4   4  -6   -0.06    0.27
   5  -3   3    1.76    0.31
   5  -3   3    1.78    0.29
  -5   3  -3    1.25    0.39
  -5   3  -3    0.79    0.29
  -5   3  -3    1.03    0.31
   6  -2   0    7.85    0.68
  -6   2   0    8.48    0.79
  -6   2   0    6.93    0.74
  -6   2   0    8.93    0.82
   7  -1  -3    5.45    0.61
  -7   1   3    4.80    0.67
  -7   1   3    4.47    0.43
  -7   1   3    4.15    0.68
  -7   1   3    5.81    0.69
   8   0  -6    0.88    0.42
  -8   0   6    1.06    0.49
  -8   0   6   -0.12    0.40
   3  -6  11    0.44    0.46
   3  -6  11    0.06    0.47
  -3   6 -11    0.07    0.47
  -3   6 -11    0.63    0.42
  -3   6 -11    0.51    0.40
   4  -5   8   11.39    1.03
   4  -5   8   10.91    1.00
  -4   5  -8    9.71    0.97
  -4   5  -8   10.79    0.92
  -4   5  -8   10.39    0.82
  -4   5  -8   10.51    1.07
   5  -4   5    3.46    0.68
   5  -4   5    5.57    0.60
   5  -4   5    5.47    0.61
  -5   4  -5    6.20    0.67
  -5   4  -5    3.75    0.61
  -5   4  -5    5.53    0.56
  -5   4  -5    6.36    0.71
   6  -3   2    8.08    0.67
   6  -3   2    7.32    0.64
  -6   3  -2    5.22    0.69
  -6   3  -2    7.26    0.72
  -6   3  -2    7.93    0.80
   7  -2  -1    1.87    0.37
  -7   2   1    1.72    0.42
  -7   2   1    1.98    0.49
  -7   2   1    1.83    0.49
   8  -1  -4    1.49    0.43
  -8   1   4    0.28    0.40
  -8   1   4    0.85    0.41
  -8   1   4    1.31    0.49
   9   0  -7    0.57    0.48
  -9   0   7   -0.12    0.27
  -9   0   7    0.40    0.49
  -9   0   7    0.49    0.55
   3  -7  13    0.98    0.58
   3  -7  13    1.06    0.58
  -3   7 -13    0.92    0.48
  -3   7 -13    1.01    0.64
   4  -6  10    0.18    0.44
   4  -6  10    0.00    0.42
  -4   6 -10    0.37    0.40
  -4   6 -10    0.15    0.44
  -4   6 -10   -0.17    0.37
   5  -5   7    1.75    0.43
   5  -5   7    0.82    0.39
  -5   5  -7    0.23    0.39
  -5   5  -7    0.90    0.29
  -5   5  -7    0.95    0.38
   6  -4   4   14.24    1.16
   6  -4   4   15.57    1.16
  -6   4  -4   14.42    1.29
  -6   4  -4   13.72    1.17
  -6   4  -4   15.82    1.23
   7  -3   1    3.22    0.46
  -7   3  -1    3.38    0.57
  -7   3  -1    2.14    0.51
  -7   3  -1    2.44    0.47
   8  -2  -2    3.50    0.53
  -8   2   2    3.17    0.58
  -8   2   2    2.55    0.58
  -8   2   2    2.58    0.55
   9  -1  -5    2.67    0.60
  -9   1   5    2.84    0.64
  -9   1   5    3.10    0.68
   4  -7  12   -0.08    0.44
   4  -7  12    0.10    0.50
  -4   7 -12    0.17    0.46
  -4   7 -12    1.04    0.45
  -4   7 -12    0.20    0.53
   5  -6   9   -0.25    0.38
   5  -6   9    0.35    0.42
  -5   6  -9    0.49    0.45
  -5   6  -9   -0.10    0.38
   6  -5   6    8.76    0.89
   6  -5   6    8.72    0.88
  -6   5  -6    8.58    0.94
  -6   5  -6    9.13    0.94
  -6   5  -6    9.87    1.02
  -6   5  -6    7.87    0.80
   7  -4   3   84.70    5.59
   7  -4   3   81.11    5.58
  -7   4  -3   83.46    5.70
  -7   4  -3   85.69    5.64
  -7   4  -3   88.52    5.70
  -7   4  -3   84.52    5.69
   8  -3   0    0.35    0.30
  -8   3   0    1.04    0.40
  -8   3   0    0.09    0.38
  -8   3   0    0.37    0.40
   9  -2  -3    3.35    0.58
  -9   2   3    2.75    0.62
  -9   2   3    3.67    0.69
  -9   2   3    2.57    0.62
  10  -1  -6    1.38    0.56
 -10   1   6    0.37    0.51
 -10   1   6    1.30    0.58
   5  -7  11    0.20    0.51
   5  -7  11   -0.22    0.43
  -5   7 -11    0.37    0.45
  -5   7 -11    0.77    0.50
   6  -6   8    0.26    0.42
   6  -6   8   -0.14    0.38
  -6   6  -8   -0.03    0.28
  -6   6  -8   -0.05    0.42
  -6   6  -8    0.41    0.42
   7  -5   5    4.19    0.59
   7  -5   5    3.49    0.55
  -7   5  -5    3.35    0.55
  -7   5  -5    7.11    0.78
  -7   5  -5    3.13    0.65
   8  -4   2    6.92    0.72
  -8   4  -2    6.40    0.77
  -8   4  -2    5.83    0.76
  -8   4  -2    4.82    0.77
   9  -3  -1    4.00    0.58
  -9   3   1    2.84    0.62
  -9   3   1    3.83    0.70
  -9   3   1    2.81    0.57
 -10   2   4    5.68    0.81
 -10   2   4    4.10    0.77
 -10   2   4    4.26    0.80
   6  -7  10    0.72    0.52
   6  -7  10    0.16    0.42
  -6   7 -10    0.22    0.47
  -6   7 -10    0.06    0.37
   7  -6   7   39.10    2.68
   7  -6   7   37.66    2.67
  -7   6  -7   37.40    2.70
  -7   6  -7   35.29    2.75
  -7   6  -7   35.99    2.59
  -7   6  -7   36.89    2.76
   8  -5   4   14.95    1.21
   8  -5   4   14.22    1.19
  -8   5  -4   15.44    1.38
  -8   5  -4   13.88    1.25
  -8   5  -4   14.10    1.31
  -8   5  -4   14.48    1.33
   9  -4   1    2.05    0.47
  -9   4  -1    0.54    0.47
  -9   4  -1    1.84    0.51
  -9   4  -1    1.79    0.54
 -10   3   2    1.33    0.57
 -10   3   2    1.84    0.58
 -10   3   2    2.86    0.65
 -11   2   5    0.84    0.55
   7  -7   9    0.12    0.44
   7  -7   9    0.06    0.43
  -7   7  -9   -0.08    0.44
  -7   7  -9   -0.71    0.38
  -7   7  -9   -1.00    0.35
   8  -6   6   21.17    1.64
   8  -6   6   21.95    1.62
  -8   6  -6   19.88    1.74
  -8   6  -6   17.18    1.68
  -8   6  -6   20.60    1.61
  -9   5  -3   -0.21    0.41
  -9   5  -3    0.75    0.42
  -9   5  -3    0.81    0.53
 -10   4   0   -0.10    0.42
 -10   4   0   -0.06    0.49
 -10   4   0   -0.22    0.40
 -11   3   3   -0.31    0.51
 -11   3   3    0.44    0.54
 -11   3   3    0.07    0.48
   8  -7   8    2.54    0.61
  -8   7  -8    3.40    0.58
  -8   7  -8    2.91    0.67
  -8   7  -8    2.95    0.67
   9  -6   5    1.79    0.47
  -9   6  -5    1.76    0.52
  -9   6  -5    1.70    0.55
  -9   6  -5    1.88    0.62
 -10   5  -2    0.38    0.47
 -10   5  -2   -0.19    0.38
 -10   5  -2   -0.53    0.44
 -11   4   1    3.28    0.69
 -11   4   1    3.16    0.74
 -11   4   1    2.20    0.64
   9  -7   7    0.65    0.46
  -9   7  -7    0.94    0.58
  -9   7  -7    1.69    0.49
  -9   7  -7    0.52    0.55
  -9   7  -7    1.38    0.54
 -10   6  -4    0.33    0.46
 -10   6  -4    1.26    0.60
 -10   6  -4    0.24    0.43
 -11   5  -1   -0.09    0.46
 -11   5  -1    0.26    0.48
 -11   5  -1   -0.01    0.53
  10  -7   6    1.96    0.50
 -10   7  -6    2.27    0.72
 -10   7  -6    2.08    0.58
 -10   7  -6    1.58    0.65
 -11   6  -3    2.44    0.65
 -11   6  -3    2.69    0.67
 -11   6  -3    2.28    0.69
 -11   8  -2   -0.11    0.59
  11  -8   2    0.01    0.50
 -10   9  -5    0.54    0.54
 -10   9  -5    1.00    0.55
 -10   9  -5    2.78    0.75
  10  -9   5    1.99    0.61
 -11   7   0    1.99    0.65
 -11   7   0    0.90    0.53
 -11   7   0    1.18    0.61
  11  -7   0    1.18    0.57
 -10   8  -3    1.29    0.58
 -10   8  -3    0.27    0.49
 -10   8  -3    0.38    0.54
  10  -8   3    0.35    0.49
  -9   9  -6    0.81    0.58
  -9   9  -6    0.72    0.57
  -9   9  -6    0.58    0.50
  -9   9  -6    0.12    0.59
   9  -9   6    2.28    0.61
   9  -9   6    1.67    0.58
 -11   6   2    0.04    0.53
 -11   6   2    0.56    0.55
 -11   6   2   -0.05    0.49
  11  -6  -2   -0.04    0.53
 -10   7  -1    1.04    0.56
 -10   7  -1    1.52    0.63
 -10   7  -1    1.35    0.59
  10  -7   1    0.03    0.48
  -9   8  -4    4.39    0.76
  -9   8  -4    3.67    0.77
  -9   8  -4    4.68    0.84
   9  -8   4    5.39    0.81
  -8   9  -7    0.26    0.44
  -8   9  -7   -0.19    0.51
  -8   9  -7    0.08    0.52
  -8   9  -7   -0.06    0.45
   8  -9   7   -0.18    0.44
   8  -9   7    0.65    0.47
 -11   5   4    0.64    0.59
 -11   5   4    1.14    0.59
  11  -5  -4    1.06    0.56
 -10   6   1    0.96    0.55
 -10   6   1    0.69    0.50
 -10   6   1   -0.37    0.46
  10  -6  -1    0.83    0.50
  -9   7  -2    0.05    0.47
  -9   7  -2    0.58    0.47
  -9   7  -2   -0.14    0.41
   9  -7   2    0.17    0.44
  -8   8  -5    1.05    0.48
  -8   8  -5    0.75    0.54
  -8   8  -5    0.00    0.53
  -8   8  -5    0.95    0.53
   8  -8   5    1.49    0.52
   8  -8   5    0.38    0.42
  -7   9  -8    9.16    1.22
  -7   9  -8   10.04    1.04
  -7   9  -8   10.13    1.23
   7  -9   8   12.19    1.20
   7  -9   8   10.11    1.19
 -10   5   3   -0.29    0.42
 -10   5   3    0.44    0.49
 -10   5   3    0.64    0.50
  10  -5  -3   -0.13    0.44
  -9   6   0   13.53    1.30
  -9   6   0   12.40    1.27
  -9   6   0   10.73    1.20
   9  -6   0   11.99    1.18
  -8   7  -3    2.56    0.63
  -8   7  -3    2.66    0.71
  -8   7  -3    3.10    0.60
  -8   7  -3    2.28    0.57
   8  -7   3    2.76    0.59
  -7   8  -6    0.42    0.47
  -7   8  -6    1.01    0.53
  -7   8  -6    1.00    0.54
  -7   8  -6    0.62    0.42
   7  -8   6    0.79    0.48
   7  -8   6    0.85    0.46
  -6   9  -9    8.34    1.12
  -6   9  -9    8.79    0.92
  -6   9  -9    7.82    1.13
   6  -9   9    8.45    1.09
   6  -9   9    8.95    1.07
 -10   4   5   -0.21    0.49
 -10   4   5   -0.33    0.42
  10  -4  -5    0.82    0.51
  -9   5   2    0.75    0.50
  -9   5   2    1.44    0.49
  -9   5   2    2.05    0.60
   9  -5  -2    1.83    0.53
  -8   6  -1    2.19    0.57
  -8   6  -1    2.24    0.54
  -8   6  -1    1.64    0.55
   8  -6   1    1.89    0.51
  -7   7  -4   -0.44    0.36
  -7   7  -4    0.03    0.43
  -7   7  -4    0.09    0.36
   7  -7   4   -0.15    0.35
   7  -7   4   -0.34    0.34
  -6   8  -7    0.35    0.52
  -6   8  -7   -0.33    0.40
   6  -8   7    0.45    0.44
   6  -8   7    0.83    0.48
  -5   9 -10    3.75    0.79
  -5   9 -10    2.43    0.72
  -5   9 -10    2.84    0.65
   5  -9  10    3.39    0.72
   5  -9  10    3.20    0.69
 -10   3   7   -0.49    0.44
 -10   3   7   -0.10    0.49
  10  -3  -7   -0.45    0.44
  -9   4   4    1.21    0.52
  -9   4   4    1.81    0.61
  -9   4   4    1.71    0.48
   9  -4  -4    1.61    0.54
  -8   5   1    4.82    0.72
  -8   5   1    4.92    0.67
  -8   5   1    3.79    0.69
   8  -5  -1    5.79    0.70
  -7   6  -2    5.26    0.76
  -7   6  -2    6.67    0.89
  -7   6  -2    4.56    0.73
  -7   6  -2    4.61    0.69
   7  -6   2    7.54    0.81
   7  -6   2    4.37    0.65
  -6   7  -5    2.08    0.59
  -6   7  -5    1.78    0.54
  -6   7  -5    1.60    0.52
   6  -7   5    1.95    0.49
   6  -7   5    3.04    0.55
   6  -7   5    1.89    0.49
  -5   8  -8    8.75    0.95
  -5   8  -8    8.86    1.08
  -5   8  -8    7.74    1.07
   5  -8   8    8.35    0.99
   5  -8   8    8.49    0.97
  -4   9 -11   -0.23    0.51
  -4   9 -11   -0.32    0.47
  -4   9 -11   -0.40    0.44
   4  -9  11   -0.13    0.48
   4  -9  11   -1.19    0.42
  -9   3   6    0.27    0.49
  -9   3   6    0.43    0.49
   9  -3  -6    0.15    0.47
  -8   4   3    2.11    0.46
  -8   4   3    1.54    0.53
  -8   4   3    1.35    0.50
   8  -4  -3    2.05    0.54
  -7   5   0    3.13    0.53
  -7   5   0    1.98    0.55
  -7   5   0    2.38    0.54
   7  -5   0    2.75    0.51
   7  -5   0    2.15    0.46
  -6   6  -3    5.35    0.75
  -6   6  -3    4.90    0.74
   6  -6   3    5.15    0.65
   6  -6   3    4.51    0.64
   6  -6   3    4.99    0.65
  -5   7  -6    0.20    0.41
  -5   7  -6    0.02    0.41
   5  -7   6    0.26    0.41
   5  -7   6   -0.12    0.32
   5  -7   6   -0.12    0.37
  -4   8  -9    3.69    0.66
  -4   8  -9    2.53    0.68
  -4   8  -9    3.99    0.71
   4  -8   9    2.49    0.63
   4  -8   9    2.27    0.63
   4  -8   9    2.72    0.65
  -3   9 -12    0.51    0.50
  -3   9 -12   -0.12    0.51
  -3   9 -12   -0.75    0.52
   3  -9  12   -0.02    0.49
   3  -9  12    1.38    0.60
  -9   2   8    1.00    0.54
  -9   2   8    0.29    0.52
   9  -2  -8    0.58    0.52
  -8   3   5   12.65    1.25
  -8   3   5   12.09    1.30
   8  -3  -5   15.58    1.29
  -7   4   2   17.68    1.49
  -7   4   2   16.70    1.43
  -7   4   2   18.27    1.37
   7  -4  -2   18.21    1.42
   7  -4  -2   16.40    1.39
  -6   5  -1    8.70    0.87
  -6   5  -1    8.80    0.96
  -6   5  -1    8.98    0.86
  -6   5  -1    7.79    0.86
   6  -5   1    7.87    0.81
   6  -5   1    7.95    0.80
  -5   6  -4    2.48    0.54
  -5   6  -4    1.55    0.45
   5  -6   4    2.47    0.50
   5  -6   4    2.36    0.45
   5  -6   4    2.49    0.48
  -4   7  -7    5.96    0.85
  -4   7  -7    6.06    0.82
  -4   7  -7    6.64    0.78
   4  -7   7    5.76    0.74
   4  -7   7    6.25    0.82
   4  -7   7    6.19    0.80
  -3   8 -10   -0.53    0.40
  -3   8 -10    0.77    0.53
  -3   8 -10    0.44    0.54
   3  -8  10    0.19    0.44
   3  -8  10    0.22    0.47
   3  -8  10   -0.29    0.41
  -8   2   7    4.04    0.78
  -8   2   7    4.62    0.74
   8  -2  -7    5.49    0.80
  -7   3   4    1.89    0.37
  -7   3   4    2.32    0.56
  -7   3   4    0.62    0.45
   7  -3  -4    1.19    0.45
   7  -3  -4    0.56    0.40
  -6   4   1    5.65    0.66
  -6   4   1    4.17    0.63
  -6   4   1    4.27    0.55
   6  -4  -1    3.66    0.61
   6  -4  -1    4.53    0.58
  -5   5  -2    5.34    0.74
  -5   5  -2    7.74    0.79
   5  -5   2    6.90    0.72
   5  -5   2    6.30    0.69
   5  -5   2    7.62    0.73
  -4   6  -5    6.55    0.80
  -4   6  -5    6.34    0.71
  -4   6  -5    6.34    0.77
   4  -6   5    6.35    0.71
   4  -6   5    6.74    0.74
   4  -6   5    5.86    0.73
  -3   7  -8   10.48    1.14
  -3   7  -8   10.38    1.05
  -3   7  -8    9.32    1.00
   3  -7   8   10.56    1.03
   3  -7   8    9.79    1.06
   3  -7   8    9.71    1.04
  -2   8 -11    2.18    0.57
  -2   8 -11    2.01    0.69
  -2   8 -11    1.12    0.58
   2  -8  11    2.54    0.68
   2  -8  11    1.54    0.56
   2  -8  11    1.89    0.65
  -8   1   9    2.46    0.63
  -8   1   9    0.63    0.57
   8  -1  -9    2.40    0.63
  -7   2   6    1.06    0.46
  -7   2   6    0.83    0.46
   7  -2  -6    1.02    0.46
   7  -2  -6    0.54    0.39
  -6   3   3   19.53    1.39
  -6   3   3   19.20    1.47
  -6   3   3   17.45    1.51
   6  -3  -3   20.82    1.46
   6  -3  -3   16.62    1.46
  -5   4   0    4.76    0.63
  -5   4   0    5.78    0.64
  -5   4   0    4.19    0.53
  -5   4   0    3.61    0.53
   5  -4   0    3.67    0.50
   5  -4   0    5.29    0.59
  -4   5  -3   53.42    3.65
  -4   5  -3   57.79    3.67
   4  -5   3   52.80    3.62
   4  -5   3   51.18    3.60
   4  -5   3   52.65    3.59
  -3   6  -6    2.96    0.50
  -3   6  -6    2.39    0.52
  -3   6  -6    1.70    0.49
   3  -6   6    1.97    0.44
   3  -6   6    2.90    0.49
   3  -6   6    2.45    0.49
  -2   7  -9   10.76    1.09
  -2   7  -9   13.21    1.24
  -2   7  -9   10.36    1.17
   2  -7   9   11.89    1.13
   2  -7   9   10.08    1.13
   2  -7   9   10.96    1.15
  -1   8 -12   -0.94    0.47
  -1   8 -12   -0.04    0.52
  -1   8 -12    0.55    0.50
   1  -8  12   -0.03    0.48
   1  -8  12    0.68    0.58
   1  -8  12   -0.13    0.47
  -7   1   8    0.95    0.47
  -7   1   8    1.64    0.60
   7  -1  -8   -0.16    0.41
  -6   2   5   20.07    1.67
  -6   2   5   21.23    1.64
   6  -2  -5   20.38    1.64
   6  -2  -5   21.59    1.62
  -5   3   2   34.78    2.41
  -5   3   2   34.00    2.44
  -5   3   2   35.14    2.36
   5  -3  -2   33.95    2.43
   5  -3  -2   35.32    2.40
  -4   4  -1   11.53    0.96
  -4   4  -1   10.46    0.91
   4  -4   1   10.92    0.88
   4  -4   1   11.49    0.86
   4  -4   1    8.81    0.87
  -3   5  -4    7.45    0.71
  -3   5  -4    6.22    0.66
  -3   5  -4    6.30    0.73
   3  -5   4    6.00    0.66
   3  -5   4    6.54    0.70
   3  -5   4    6.33    0.66
  -2   6  -7   24.52    1.77
  -2   6  -7   21.86    1.77
  -2   6  -7   23.16    1.71
   2  -6   7   23.40    1.70
   2  -6   7   22.67    1.72
   2  -6   7   18.97    1.71
  -1   7 -10    1.04    0.51
  -1   7 -10    0.62    0.53
  -1   7 -10    1.55    0.54
   1  -7  10    0.68    0.52
   1  -7  10    1.37    0.50
   1  -7  10    2.01    0.58
  -7   0  10    1.01    0.54
  -7   0  10    0.66    0.57
  -7   0  10    0.70    0.51
   7   0 -10    0.47    0.49
  -6   1   7    3.06    0.67
   6  -1  -7    4.66    0.73
   6  -1  -7    7.89    0.81
  -5   2   4    0.12    0.21
  -5   2   4    0.86    0.37
  -5   2   4    1.21    0.38
   5  -2  -4    1.04    0.37
   5  -2  -4    1.14    0.34
  -4   3   1  185.32   11.74
  -4   3   1  177.12   11.81
  -4   3   1  185.04   11.78
   4  -3  -1  175.05   11.80
   4  -3  -1  186.51   11.77
  -3   4  -2    0.36    0.31
  -3   4  -2    0.98    0.27
  -3   4  -2    0.73    0.29
  -3   4  -2    0.58    0.30
   3  -4   2    0.73    0.26
   3  -4   2    0.35    0.26
   3  -4   2    0.57    0.27
  -2   5  -5   -0.05    0.28
  -2   5  -5   -0.06    0.26
  -2   5  -5    0.42    0.32
   2  -5   5    0.07    0.25
   2  -5   5    0.07    0.25
   2  -5   5   -0.02    0.27
  -1   6  -8   -0.02    0.42
  -1   6  -8   -0.07    0.39
  -1   6  -8    0.00    0.34
   1  -6   8    0.14    0.38
   1  -6   8    0.82    0.46
   1  -6   8    0.26    0.38
   0   7 -11    0.38    0.49
   0   7 -11    0.33    0.50
   0   7 -11    0.63    0.53
   0  -7  11    0.13    0.47
   0  -7  11    0.05    0.48
   0  -7  11    0.40    0.49
  -6   0   9   61.44    4.41
  -6   0   9   64.50    4.24
   6   0  -9   57.97    4.38
   6   0  -9   63.91    4.33
  -5   1   6    4.24    0.57
  -5   1   6    3.50    0.61
   5  -1  -6    2.65    0.54
   5  -1  -6    4.29    0.58
  -4   2   3   16.69    1.14
  -4   2   3   14.87    1.26
  -4   2   3   16.42    1.24
   4  -2  -3   17.25    1.26
   4  -2  -3   15.99    1.22
  -3   3   0    3.90    0.45
  -3   3   0    2.16    0.37
   3  -3   0    2.09    0.37
   3  -3   0    4.28    0.40
  -2   4  -3    2.84    0.41
  -2   4  -3    2.25    0.36
  -2   4  -3    1.73    0.38
   2  -4   3    2.38    0.38
   2  -4   3    2.39    0.38
   2  -4   3    2.12    0.33
  -1   5  -6    1.01    0.39
  -1   5  -6    0.60    0.35
  -1   5  -6    1.18    0.35
   1  -5   6    1.44    0.37
   1  -5   6    1.32    0.36
   1  -5   6    0.98    0.38
   0   6  -9   21.86    1.72
   0   6  -9   19.18    1.60
   0   6  -9   17.24    1.61
   0  -6   9   20.35    1.62
   0  -6   9   21.78    1.69
   0  -6   9   18.85    1.59
   1   7 -12   -0.45    0.52
   1   7 -12   -0.02    0.45
   1   7 -12   -0.03    0.55
  -1  -7  12   -0.74    0.46
  -1  -7  12    1.00    0.51
  -1  -7  12    0.90    0.55
  -6  -1  11    3.95    0.73
  -6  -1  11    5.79    0.78
  -6  -1  11    2.55    0.73
   6   1 -11    3.62    0.76
  -5   0   8    1.51    0.50
  -5   0   8    1.32    0.44
   5   0  -8    0.68    0.47
   5   0  -8    1.64    0.53
  -4   1   5    9.53    0.80
  -4   1   5    7.52    0.82
   4  -1  -5    9.97    0.83
   4  -1  -5    8.42    0.85
  -3   2   2    0.32    0.25
  -3   2   2    0.11    0.16
  -3   2   2    0.14    0.24
   3  -2  -2   -0.19    0.20
   3  -2  -2    0.06    0.23
  -2   3  -1   42.17    2.74
  -2   3  -1   39.98    2.70
  -2   3  -1   39.57    2.74
   2  -3   1   43.12    2.73
   2  -3   1   39.33    2.69
   2  -3   1   39.72    2.70
  -1   4  -4   34.99    2.57
  -1   4  -4   40.15    2.55
  -1   4  -4   38.95    2.58
   1  -4   4   32.16    2.57
   1  -4   4   38.99    2.55
   1  -4   4   39.59    2.54
   0   5  -7    1.57    0.41
   0   5  -7    1.19    0.42
   0   5  -7    1.52    0.45
   0  -5   7    1.25    0.40
   0  -5   7    1.63    0.42
   0  -5   7    1.70    0.41
   1   6 -10    0.53    0.45
   1   6 -10    1.01    0.52
   1   6 -10    0.71    0.50
  -1  -6  10    0.88    0.44
  -1  -6  10    0.93    0.48
  -1  -6  10    1.70    0.56
  -5  -1  10   14.37    1.54
  -5  -1  10   17.40    1.38
  -5  -1  10   18.28    1.50
   5   1 -10   17.76    1.52
   5   1 -10   17.08    1.60
  -4   0   7    4.59    0.57
  -4   0   7    4.50    0.66
   4   0  -7    4.02    0.65
   4   0  -7    4.61    0.62
  -3   1   4   13.17    1.10
  -3   1   4   14.21    1.04
   3  -1  -4   14.88    1.13
   3  -1  -4   13.41    1.06
  -2   2   1 1000.00   61.59
  -2   2   1  930.28   61.46
   2  -2  -1  946.95   61.44
  -1   3  -2   13.89    1.06
  -1   3  -2   15.36    1.12
  -1   3  -2   15.89    1.10
   1  -3   2   15.39    1.10
   1  -3   2   14.92    1.07
   1  -3   2   14.18    1.07
   0   4  -5   43.66    2.97
   0   4  -5   44.91    2.98
   0   4  -5   41.78    2.92
   0  -4   5   41.90    2.91
   0  -4   5   44.39    2.98
   0  -4   5   42.64    2.93
   1   5  -8    5.31    0.70
   1   5  -8    4.30    0.70
   1   5  -8    5.95    0.78
  -1  -5   8    5.21    0.67
  -1  -5   8    5.11    0.68
  -1  -5   8    4.85    0.75
   2   6 -11   -0.02    0.42
   2   6 -11    0.68    0.48
   2   6 -11    1.29    0.57
  -2  -6  11   -0.13    0.42
  -2  -6  11   -0.10    0.44
  -2  -6  11    0.19    0.50
  -5  -2  12    1.78    0.62
  -5  -2  12    0.68    0.54
   5   2 -12    3.03    0.66
   5   2 -12    1.73    0.82
  -4  -1   9    0.09    0.40
  -4  -1   9   -0.22    0.31
  -4  -1   9    0.46    0.43
   4   1  -9    0.50    0.41
   4   1  -9    0.25    0.43
  -3   0   6   23.97    1.70
  -3   0   6   22.12    1.58
   3   0  -6   21.74    1.69
   3   0  -6   21.83    1.64
  -2   1   3    1.01    0.28
  -2   1   3    1.17    0.26
   2  -1  -3    1.52    0.31
   2  -1  -3    1.53    0.27
  -1   2   0   24.59    1.59
  -1   2   0   22.05    1.60
  -1   2   0   22.90    1.58
   1  -2   0   23.59    1.58
   1  -2   0   24.77    1.60
   0   3  -3  204.82   14.45
   0   3  -3  233.79   14.47
   0   3  -3  227.96   14.43
   0  -3   3  214.51   14.46
   0  -3   3  237.65   14.44
   0  -3   3  225.69   14.43
   1   4  -6    1.29    0.38
   1   4  -6    1.01    0.36
   1   4  -6    1.36    0.36
  -1  -4   6    1.51    0.35
  -1  -4   6    1.63    0.36
  -1  -4   6    1.32    0.38
   2   5  -9   14.76    1.33
   2   5  -9   15.81    1.36
   2   5  -9   14.85    1.35
  -2  -5   9   12.80    1.36
  -2  -5   9   14.98    1.27
  -2  -5   9   15.42    1.28
   3   6 -12    0.26    0.54
   3   6 -12   -0.43    0.50
  -3  -6  12   -0.37    0.50
  -3  -6  12   -0.11    0.43
  -3  -6  12   -0.20    0.48
  -4  -2  11    6.14    0.96
  -4  -2  11    5.57    0.83
   4   2 -11    5.80    0.94
   4   2 -11    5.26    0.82
   4   2 -11    5.54    0.83
  -3  -1   8    1.64    0.45
  -3  -1   8    1.14    0.35
  -3  -1   8    0.93    0.43
   3   1  -8    0.63    0.43
   3   1  -8    1.22    0.44
  -2   0   5    1.78    0.29
  -2   0   5    1.53    0.35
   2   0  -5    1.46    0.34
   2   0  -5    1.81    0.34
  -1   1   2   23.00    1.59
   1  -1  -2   23.37    1.57
   0   2  -1  160.01    9.37
   0   2  -1  142.29    9.38
   0   2  -1  137.00    9.35
   0  -2   1  139.34    9.35
   0  -2   1  152.49    9.37
   0  -2   1  141.34    9.36
   1   3  -4    0.28    0.24
   1   3  -4    0.20    0.24
   1   3  -4    0.30    0.27
  -1  -3   4    0.09    0.21
  -1  -3   4    0.31    0.22
  -1  -3   4   -0.08    0.24
   2   4  -7    3.62    0.63
   2   4  -7    4.70    0.64
   2   4  -7    4.65    0.63
  -2  -4   7    3.85    0.63
  -2  -4   7    4.49    0.59
  -2  -4   7    5.11    0.59
   3   5 -10    0.00    0.46
   3   5 -10   -0.22    0.41
   3   5 -10   -0.08    0.45
  -3  -5  10   -0.56    0.36
  -3  -5  10   -0.50    0.43
  -3  -5  10   -0.15    0.38
  -4  -3  13    3.41    0.72
  -4  -3  13    2.88    0.76
   4   3 -13    2.60    0.68
   4   3 -13    2.04    0.68
   4   3 -13    2.42    0.72
  -3  -2  10   -0.52    0.38
  -3  -2  10   -0.03    0.36
  -3  -2  10    0.19    0.28
   3   2 -10   -0.17    0.40
   3   2 -10    0.49    0.45
   3   2 -10   -0.14    0.37
  -2  -1   7    6.51    0.63
  -2  -1   7    8.75    0.83
  -2  -1   7    7.58    0.80
   2   1  -7    9.04    0.86
   2   1  -7    6.99    0.76
  -1   0   4    0.48    0.17
  -1   0   4    0.32    0.22
   1   0  -4    0.12    0.21
   1   0  -4    0.38    0.26
   0   1   1  103.69    6.84
   0   1   1  107.06    6.85
   0   1   1  103.72    6.85
   0  -1  -1  111.96    6.86
   0  -1  -1  105.55    6.84
   0  -1  -1  106.50    6.85
   1   2  -2  276.92   16.84
   1   2  -2  255.61   16.82
   1   2  -2  256.41   16.86
  -1  -2   2  256.90   16.81
  -1  -2   2  255.04   16.81
  -1  -2   2  269.70   16.84
   2   3  -5   14.60    1.14
   2   3  -5   15.19    1.10
   2   3  -5   13.98    1.11
  -2  -3   5   14.14    1.06
  -2  -3   5   13.42    1.06
  -2  -3   5   12.60    1.12
   3   4  -8    0.98    0.48
   3   4  -8    1.82    0.49
   3   4  -8    1.03    0.46
  -3  -4   8    0.75    0.39
  -3  -4   8    1.06    0.48
  -3  -4   8    1.33    0.41
   4   5 -11    1.41    0.60
   4   5 -11    1.55    0.59
  -4  -5  11    1.49    0.61
  -4  -5  11    0.49    0.50
  -4  -5  11    1.32    0.51
  -3  -3  12    0.39    0.52
  -3  -3  12   -0.18    0.47
   3   3 -12    0.75    0.46
   3   3 -12    0.21    0.51
   3   3 -12    0.11    0.45
  -2  -2   9    2.13    0.50
  -2  -2   9    1.72    0.52
   2   2  -9    1.81    0.54
   2   2  -9    2.31    0.51
   2   2  -9    1.44    0.45
  -1  -1   6   86.14    5.66
  -1  -1   6   86.68    5.54
  -1  -1   6   87.74    5.69
   1   1  -6   83.69    5.70
   1   1  -6   85.89    5.64
   1   1  -6   84.07    5.61
   0   0   3  245.19   16.45
   0   0  -3  257.85   16.43
   0   0  -3  264.28   16.47
   1   1   0   91.94    5.86
  -1  -1   0   90.04    5.86
  -1  -1   0   90.06    5.86
   2   2  -3    1.08    0.25
   2   2  -3    1.26    0.26
  -2  -2   3    1.36    0.28
  -2  -2   3    1.59    0.24
  -2  -2   3    1.24    0.28
  -2  -2   3    1.55    0.24
   3   3  -6    6.09    0.73
   3   3  -6    7.12    0.73
   3   3  -6    7.50    0.80
  -3  -3   6    7.06    0.69
  -3  -3   6    6.54    0.67
  -3  -3   6    5.96    0.65
  -3  -3   6    5.74    0.75
   4   4  -9    3.61    0.73
   4   4  -9    4.29    0.74
   4   4  -9    5.21    0.77
  -4  -4   9    3.15    0.58
  -4  -4   9    3.79    0.60
  -4  -4   9    4.07    0.77
   5   5 -12    0.95    0.56
  -5  -5  12    0.77    0.54
  -2  -3  11    0.26    0.46
  -2  -3  11    0.30    0.45
   2   3 -11    0.44    0.40
   2   3 -11    0.18    0.40
   2   3 -11   -0.67    0.38
  -1  -2   8    1.11    0.41
  -1  -2   8    1.26    0.40
   1   2  -8    1.56    0.39
   1   2  -8    0.64    0.32
   1   2  -8    0.55    0.43
   0  -1   5  102.00    6.57
   0  -1   5   98.33    6.55
   0   1  -5  103.19    6.60
   0   1  -5   97.55    6.53
   0   1  -5  100.45    6.50
   1   0   2    7.55    0.60
  -1   0  -2    7.16    0.63
  -1   0  -2    7.78    0.57
  -1   0  -2    7.31    0.56
  -1   0  -2    8.54    0.57
   2   1  -1    7.26    0.57
  -2  -1   1    8.72    0.60
  -2  -1   1    8.67    0.60
  -2  -1   1    7.66    0.64
  -2  -1   1    7.83    0.67
  -2  -1   1    7.92    0.55
   3   2  -4    1.42    0.30
   3   2  -4    2.01    0.35
  -3  -2   4    1.45    0.35
  -3  -2   4    1.17    0.31
  -3  -2   4    1.41    0.28
  -3  -2   4    1.67    0.28
   4   3  -7   14.68    1.27
   4   3  -7   14.37    1.33
   4   3  -7   14.96    1.30
  -4  -3   7   14.71    1.34
  -4  -3   7   17.04    1.24
  -4  -3   7   15.19    1.23
  -4  -3   7   15.95    1.26
   5   4 -10    1.11    0.54
   5   4 -10    0.70    0.56
  -5  -4  10    0.34    0.39
  -5  -4  10    0.43    0.45
  -5  -4  10    0.74    0.53
  -2  -4  13    0.31    0.55
  -2  -4  13    1.53    0.80
   2   4 -13    0.30    0.57
   2   4 -13    0.57    0.48
   2   4 -13    0.76    0.49
  -1  -3  10   -0.06    0.35
  -1  -3  10   -0.58    0.35
   1   3 -10    0.20    0.42
   1   3 -10    0.03    0.32
   1   3 -10    0.24    0.37
   0  -2   7    0.56    0.31
   0  -2   7    0.57    0.29
   0   2  -7    0.31    0.34
   0   2  -7    0.52    0.25
   0   2  -7    0.74    0.30
   1  -1   4    1.30    0.23
   1  -1   4    0.94    0.27
  -1   1  -4    0.79    0.19
  -1   1  -4    1.20    0.22
  -1   1  -4    0.98    0.26
   2   0   1   53.18    3.39
  -2   0  -1   53.15    3.45
  -2   0  -1   50.84    3.42
   3   1  -2    0.27    0.16
  -3  -1   2    0.09    0.11
  -3  -1   2    0.09    0.18
  -3  -1   2    0.08    0.12
  -3  -1   2    0.01    0.13
  -3  -1   2   -0.11    0.22
   4   2  -5   74.10    5.25
   4   2  -5   79.93    5.23
  -4  -2   5   80.60    5.19
  -4  -2   5   80.20    5.23
  -4  -2   5   80.33    5.30
   5   3  -8    0.20    0.45
   5   3  -8    0.11    0.38
  -5  -3   8    0.17    0.33
  -5  -3   8    0.24    0.34
  -5  -3   8   -0.33    0.36
  -5  -3   8    0.04    0.42
   6   4 -11   -0.99    0.49
   6   4 -11    0.21    0.58
  -6  -4  11    0.57    0.55
  -6  -4  11    0.30    0.49
  -6  -4  11    1.07    0.47
  -1  -4  12    0.56    0.51
  -1  -4  12   -1.04    0.35
   1   4 -12    0.20    0.42
   1   4 -12   -0.07    0.40
   1   4 -12    0.50    0.51
   0  -3   9   -0.11    0.36
   0  -3   9   -0.62    0.27
   0   3  -9   -0.11    0.29
   0   3  -9    0.10    0.34
   0   3  -9    0.11    0.36
   1  -2   6    6.47    0.61
   1  -2   6    5.93    0.65
  -1   2  -6    6.37    0.66
  -1   2  -6    6.32    0.57
  -1   2  -6    6.24    0.60
   2  -1   3    2.14    0.30
  -2   1  -3    2.10    0.26
  -2   1  -3    2.00    0.34
  -2   1  -3    1.67    0.28
  -2   1  -3    2.41    0.24
  -3   0   0   17.95    1.24
  -3   0   0   17.03    1.20
  -3   0   0   17.02    1.13
  -3   0   0   15.90    1.13
   4   1  -3    0.63    0.23
   4   1  -3    1.89    0.29
  -4  -1   3    1.52    0.35
  -4  -1   3    0.97    0.29
  -4  -1   3    1.85    0.25
   5   2  -6    0.24    0.34
   5   2  -6    0.29    0.33
  -5  -2   6    0.58    0.40
  -5  -2   6    0.30    0.28
  -5  -2   6   -0.02    0.36
   6   3  -9    1.32    0.55
   6   3  -9    1.19    0.55
  -6  -3   9    0.25    0.47
  -6  -3   9    1.51    0.54
  -6  -3   9    1.27    0.46
  -6  -3   9    1.47    0.42
   0  -4  11    0.96    0.50
   0  -4  11    1.36    0.49
   0   4 -11    1.06    0.45
   0   4 -11    1.93    0.49
   0   4 -11    1.16    0.55
   1  -3   8    2.47    0.53
   1  -3   8    3.08    0.51
  -1   3  -8    3.58    0.58
  -1   3  -8    3.17    0.48
  -1   3  -8    2.72    0.43
   2  -2   5   54.84    3.16
   2  -2   5   45.53    3.16
  -2   2  -5   44.90    3.10
  -2   2  -5   45.06    3.10
  -2   2  -5   48.77    3.18
  -2   2  -5   44.62    3.05
   3  -1   2    0.17    0.16
  -3   1  -2    0.09    0.14
  -3   1  -2    0.55    0.26
  -3   1  -2   -0.07    0.18
  -3   1  -2    0.13    0.13
   4   0  -1    1.26    0.22
  -4   0   1    1.65    0.26
  -4   0   1    1.32    0.33
   5   1  -4   95.77    6.30
   5   1  -4  100.72    6.32
  -5  -1   4   94.91    6.33
  -5  -1   4   96.59    6.37
  -5  -1   4   92.19    6.25
   6   2  -7    0.82    0.44
  -6  -2   7    0.77    0.43
  -6  -2   7    0.54    0.44
  -6  -2   7    0.32    0.33
  -6  -2   7    1.24    0.36
   7   3 -10    0.36    0.55
   7   3 -10   -0.01    0.52
  -7  -3  10    0.44    0.53
  -7  -3  10    1.75    0.58
  -7  -3  10    0.29    0.44
  -7  -3  10    1.16    0.43
   0  -5  13    0.35    0.54
   0   5 -13   -0.13    0.50
   0   5 -13    0.41    0.43
   0   5 -13   -0.29    0.45
   1  -4  10    8.82    0.96
   1  -4  10   10.30    1.01
  -1   4 -10    7.67    1.04
  -1   4 -10    9.47    0.94
  -1   4 -10    9.23    0.88
   2  -3   7    6.11    0.70
   2  -3   7    6.74    0.67
  -2   3  -7    6.70    0.75
  -2   3  -7    5.81    0.62
  -2   3  -7    5.65    0.60
   3  -2   4   16.15    1.22
  -3   2  -4   18.08    1.28
  -3   2  -4   15.64    1.23
  -3   2  -4   17.54    1.17
   4  -1   1   11.93    0.86
  -4   1  -1   12.64    1.00
  -4   1  -1   12.13    0.89
  -4   1  -1   12.68    0.89
  -4   1  -1   12.89    0.95
   5   0  -2   11.32    0.89
  -5   0   2   11.62    0.98
  -5   0   2   10.95    0.98
  -5   0   2   13.15    0.97
   6   1  -5    0.40    0.32
  -6  -1   5    0.22    0.25
  -6  -1   5   -0.02    0.34
  -6  -1   5    0.21    0.40
   7   2  -8    1.25    0.51
  -7  -2   8   -0.22    0.41
  -7  -2   8   -0.22    0.48
  -7  -2   8    0.65    0.38
  -7  -2   8    0.56    0.33
   1  -5  12   -0.49    0.40
  -1   5 -12    0.45    0.44
  -1   5 -12   -0.30    0.41
  -1   5 -12   -0.11    0.39
   2  -4   9    3.55    0.59
   2  -4   9    3.07    0.57
  -2   4  -9    3.16    0.51
  -2   4  -9    3.89    0.54
  -2   4  -9    2.38    0.59
   3  -3   6   42.37    2.67
   3  -3   6   36.47    2.68
  -3   3  -6   37.16    2.63
  -3   3  -6   37.79    2.61
  -3   3  -6   37.91    2.56
  -3   3  -6   43.36    2.75
   4  -2   3    3.64    0.38
   4  -2   3    3.99    0.42
  -4   2  -3    3.82    0.53
  -4   2  -3    3.79    0.43
  -4   2  -3    3.38    0.42
   5  -1   0    1.36    0.25
  -5   1   0    1.40    0.33
  -5   1   0    1.26    0.35
  -5   1   0    1.73    0.29
   6   0  -3   14.85    1.12
  -6   0   3   15.39    1.21
  -6   0   3   14.15    0.99
  -6   0   3   15.85    1.21
  -6   0   3   12.82    1.16
   7   1  -6    9.44    0.91
  -7  -1   6    5.29    0.85
  -7  -1   6    6.65    0.67
  -7  -1   6    7.54    0.91
  -7  -1   6    6.82    0.69
   8   2  -9   -0.43    0.44
  -8  -2   9   -0.56    0.44
  -8  -2   9    0.87    0.55
  -8  -2   9    0.16    0.33
   2  -5  11    0.24    0.42
  -2   5 -11   -0.01    0.42
  -2   5 -11    0.06    0.40
  -2   5 -11    0.08    0.35
   3  -4   8    1.97    0.43
   3  -4   8    2.87    0.51
  -3   4  -8    2.15    0.40
  -3   4  -8    1.98    0.51
  -3   4  -8    1.68    0.37
   4  -3   5    0.30    0.24
   4  -3   5    0.40    0.26
  -4   3  -5    0.56    0.31
  -4   3  -5    0.04    0.19
  -4   3  -5    0.48    0.27
  -4   3  -5    0.43    0.27
   5  -2   2   31.92    2.21
   5  -2   2   33.23    2.21
  -5   2  -2   34.62    2.25
  -5   2  -2   32.68    2.33
  -5   2  -2   32.32    2.27
   6  -1  -1    3.23    0.38
  -6   1   1    2.38    0.45
  -6   1   1    2.36    0.41
  -6   1   1    2.95    0.50
   7   0  -4    1.36    0.41
  -7   0   4    2.17    0.28
  -7   0   4    2.21    0.52
  -7   0   4    2.14    0.50
   8   1  -7    0.25    0.42
  -8  -1   7   -0.83    0.38
  -8  -1   7    0.23    0.27
  -8  -1   7    0.29    0.34
  -8  -1   7    0.10    0.51
   2  -6  13    1.04    0.55
   2  -6  13    0.86    0.57
  -2   6 -13    1.12    0.47
  -2   6 -13    1.23    0.62
  -3   5 -10   -0.33    0.38
   4  -4   7    4.45    0.57
   4  -4   7    3.70    0.53
   4  -4   7    4.51    0.61
  -4   4  -7    4.37    0.43
  -4   4  -7    4.81    0.57
  -4   4  -7    3.39    0.59
   5  -3   4   10.57    0.79
   5  -3   4    8.99    0.79
  -5   3  -4    9.68    0.84
  -5   3  -4    8.25    0.89
  -5   3  -4    8.70    0.80
   6  -2   1    1.38    0.30
  -6   2  -1    1.66    0.40
  -6   2  -1    1.79    0.35
  -6   2  -1    1.30    0.39
   7  -1  -2    9.16    0.83
  -7   1   2    8.95    0.90
  -7   1   2    9.31    0.97
  -7   1   2   10.12    0.98
   8   0  -5    6.63    0.79
  -8   0   5    6.15    0.85
  -8   0   5    6.32    0.85
  -8   0   5    6.18    0.54
   9   1  -8    1.09    0.53
  -9  -1   8    1.46    0.62
  -9  -1   8    0.12    0.49
  -9  -1   8    1.14    0.32
   3  -6  12    0.94    0.52
   3  -6  12   -0.09    0.47
  -3   6 -12    0.08    0.43
  -3   6 -12    0.29    0.49
  -3   6 -12    0.36    0.41
   4  -5   9    3.83    0.64
   4  -5   9    2.73    0.55
  -4   5  -9    2.33    0.59
  -4   5  -9    3.20    0.54
  -4   5  -9    3.72    0.49
   5  -4   6   -0.18    0.27
   5  -4   6    0.39    0.33
  -5   4  -6    0.26    0.31
  -5   4  -6    0.13    0.33
  -5   4  -6    0.73    0.40
  -5   4  -6    0.68    0.28
   6  -3   3    2.83    0.39
   6  -3   3    2.40    0.37
  -6   3  -3    2.45    0.52
  -6   3  -3    2.48    0.45
   7  -2   0    9.78    0.79
  -7   2   0   10.05    0.94
  -7   2   0    9.06    0.93
  -7   2   0    7.69    0.83
   8  -1  -3    9.41    0.88
  -8   1   3    6.41    0.93
  -8   1   3   11.63    1.05
  -8   1   3    9.91    0.97
   9   0  -6    0.67    0.49
  -9   0   6    0.20    0.46
  -9   0   6    0.89    0.54
   4  -6  11    0.24    0.45
   4  -6  11    0.57    0.47
  -4   6 -11    0.65    0.39
  -4   6 -11   -0.13    0.35
  -4   6 -11    0.32    0.47
   5  -5   8    2.61    0.56
   5  -5   8    3.61    0.55
  -5   5  -8    3.02    0.39
  -5   5  -8    2.40    0.48
  -5   5  -8    2.93    0.62
   6  -4   5    0.76    0.33
   6  -4   5    1.03    0.35
  -6   4  -5    0.97    0.44
  -6   4  -5    1.40    0.37
  -6   4  -5    0.65    0.36
   7  -3   2    1.21    0.34
  -7   3  -2    0.37    0.34
  -7   3  -2    1.16    0.44
  -7   3  -2    0.28    0.38
   8  -2  -1    0.28    0.29
  -8   2   1    0.76    0.44
  -8   2   1    0.71    0.36
  -8   2   1    0.34    0.44
   9  -1  -4   -0.36    0.33
  -9   1   4   -0.23    0.41
  -9   1   4   -0.39    0.46
  -9   1   4    0.09    0.39
 -10   0   7    3.87    0.83
 -10   0   7    2.86    0.70
   5  -6  10    0.09    0.43
   5  -6  10   -0.25    0.40
  -5   6 -10   -0.48    0.32
  -5   6 -10   -0.26    0.43
   6  -5   7    3.17    0.54
   6  -5   7    3.04    0.54
  -6   5  -7    3.81    0.60
  -6   5  -7    3.34    0.48
  -6   5  -7    3.70    0.66
  -6   5  -7    2.60    0.61
   7  -4   4   57.44    3.87
   7  -4   4   56.80    3.87
  -7   4  -4   54.18    3.94
  -7   4  -4   59.58    4.01
  -7   4  -4   60.69    3.93
   8  -3   1    0.50    0.36
  -8   3  -1    0.68    0.44
  -8   3  -1    0.38    0.33
  -8   3  -1    1.19    0.45
  -9   2   2    0.53    0.48
  -9   2   2    1.10    0.45
  -9   2   2    1.31    0.53
 -10   1   5   -0.29    0.41
 -10   1   5    1.14    0.57
   5  -7  12    0.02    0.48
   5  -7  12   -0.42    0.45
  -5   7 -12   -0.42    0.52
   6  -6   9    3.08    0.64
   6  -6   9    3.13    0.64
  -6   6  -9    4.90    0.68
  -6   6  -9    2.60    0.64
  -6   6  -9    4.94    0.78
   7  -5   6   -0.08    0.33
   7  -5   6    0.36    0.35
  -7   5  -6    0.98    0.36
  -7   5  -6    0.89    0.41
  -7   5  -6   -0.02    0.43
   8  -4   3    0.48    0.34
  -8   4  -3    1.28    0.51
  -8   4  -3    0.59    0.40
  -8   4  -3    0.76    0.41
  -9   3   0   -0.57    0.38
  -9   3   0   -0.38    0.39
  -9   3   0    0.24    0.37
 -10   2   3    0.33    0.45
 -10   2   3   -0.33    0.46
 -10   2   3   -0.28    0.43
   6  -7  11    0.33    0.48
   6  -7  11   -0.49    0.44
  -6   7 -11   -0.05    0.45
  -6   7 -11   -0.23    0.40
   7  -6   8    1.07    0.47
   7  -6   8    0.23    0.41
  -7   6  -8    0.75    0.47
  -7   6  -8    1.40    0.38
  -7   6  -8    0.40    0.48
  -7   6  -8    1.00    0.48
   8  -5   5   17.94    1.42
  -8   5  -5   18.24    1.47
  -8   5  -5   18.72    1.55
  -8   5  -5   18.33    1.61
  -9   4  -2   -0.02    0.35
  -9   4  -2   -0.15    0.42
  -9   4  -2    0.22    0.39
 -10   3   1    0.46    0.42
 -10   3   1    1.17    0.57
 -10   3   1    1.24    0.53
 -11   2   4    2.14    0.65
 -11   2   4    0.57    0.52
   7  -7  10    0.87    0.50
   7  -7  10    0.79    0.61
  -7   7 -10    1.12    0.52
  -7   7 -10    0.57    0.44
  -7   7 -10    0.46    0.50
   8  -6   7   -0.07    0.36
  -8   6  -7    0.11    0.35
  -8   6  -7    0.06    0.40
  -8   6  -7   -0.06    0.47
  -9   5  -4    0.66    0.50
  -9   5  -4    0.50    0.44
  -9   5  -4    1.19    0.45
 -10   4  -1    1.17    0.52
 -10   4  -1    0.99    0.54
 -10   4  -1    1.04    0.46
 -11   3   2    0.99    0.61
 -11   3   2    1.14    0.55
 -11   3   2    1.58    0.63
   8  -7   9    0.99    0.48
  -8   7  -9    0.80    0.49
  -8   7  -9    0.01    0.47
   9  -6   6    0.60    0.37
  -9   6  -6    0.55    0.42
  -9   6  -6    0.65    0.48
  -9   6  -6    0.74    0.50
  -9   6  -6   -0.21    0.43
 -10   5  -3    2.42    0.69
 -10   5  -3    2.52    0.61
 -10   5  -3    2.38    0.60
 -11   4   0    0.34    0.47
 -11   4   0   -0.03    0.57
 -11   4   0    0.32    0.48
   9  -7   8    0.26    0.42
  -9   7  -8    0.43    0.50
  -9   7  -8    0.95    0.44
  -9   7  -8   -0.08    0.47
 -10   6  -5   -0.16    0.40
 -10   6  -5    0.51    0.52
 -10   6  -5    0.36    0.46
 -11   5  -2    0.21    0.47
 -11   5  -2    1.05    0.55
 -11   5  -2    0.46    0.52
 -11   6  -4    0.84    0.59
 -11   6  -4    1.28    0.55
 -11   6  -4    0.51    0.50
 -11   8  -1    0.41    0.55
 -11   8  -1    0.96    0.66
  11  -8   1    0.68    0.52
 -10   9  -4    0.37    0.53
 -10   9  -4    0.06    0.58
 -10   9  -4    0.56    0.55
  10  -9   4   -0.42    0.47
 -11   7   1    6.26    0.91
 -11   7   1    3.76    0.77
 -11   7   1    4.92    0.90
  11  -7  -1    3.87    0.82
 -10   8  -2   -0.07    0.50
 -10   8  -2    0.72    0.53
 -10   8  -2    0.06    0.54
  10  -8   2    1.02    0.53
  -9   9  -5    0.22    0.46
  -9   9  -5    0.09    0.60
  -9   9  -5    0.01    0.48
  -9   9  -5   -0.62    0.47
   9  -9   5    0.41    0.48
  -8  10  -8    1.81    0.73
  -8  10  -8    1.68    0.56
  -8  10  -8    1.13    0.70
  -8  10  -8    0.75    0.62
   8 -10   8    0.54    0.56
   8 -10   8    1.75    0.60
 -11   6   3    1.25    0.58
 -11   6   3    0.29    0.52
  11  -6  -3    0.59    0.57
 -10   7   0   -1.07    0.44
 -10   7   0   -0.49    0.47
 -10   7   0   -0.38    0.43
  10  -7   0   -0.31    0.44
  -9   8  -3    0.49    0.48
  -9   8  -3    0.58    0.47
  -9   8  -3   -0.32    0.48
   9  -8   3    0.05    0.45
  -8   9  -6    3.05    0.62
  -8   9  -6    2.94    0.76
  -8   9  -6    1.97    0.70
   8  -9   6    3.26    0.65
   8  -9   6    3.08    0.65
  -7  10  -9   -0.58    0.40
  -7  10  -9    0.52    0.58
  -7  10  -9   -0.17    0.55
  -7  10  -9    0.38    0.57
   7 -10   9    0.23    0.47
   7 -10   9   -0.33    0.48
 -10   6   2    0.91    0.57
 -10   6   2    2.32    0.63
 -10   6   2    2.71    0.62
  10  -6  -2    1.99    0.64
  -9   7  -1    3.64    0.72
  -9   7  -1    2.09    0.63
  -9   7  -1    3.32    0.68
   9  -7   1    4.28    0.69
  -8   8  -4   -0.02    0.41
  -8   8  -4   -0.17    0.42
  -8   8  -4    0.43    0.60
  -8   8  -4   -0.12    0.43
   8  -8   4   -0.38    0.40
  -7   9  -7   -0.04    0.47
  -7   9  -7    0.08    0.51
  -7   9  -7    0.22    0.43
  -7   9  -7    0.51    0.54
   7  -9   7   -0.44    0.42
   7  -9   7    1.06    0.52
  -6  10 -10    0.12    0.56
  -6  10 -10   -0.16    0.55
   6 -10  10   -0.46    0.47
   6 -10  10    0.11    0.49
 -10   5   4   10.16    1.16
 -10   5   4    7.56    1.17
  10  -5  -4   12.23    1.20
  -9   6   1   -0.33    0.41
  -9   6   1    0.29    0.44
  -9   6   1    0.17    0.43
   9  -6  -1    0.41    0.44
  -8   7  -2    0.45    0.44
  -8   7  -2    0.19    0.46
  -8   7  -2    0.07    0.44
   8  -7   2    0.13    0.38
  -7   8  -5    0.21    0.46
  -7   8  -5   -0.21    0.38
  -7   8  -5    0.24    0.50
   7  -8   5    0.01    0.41
   7  -8   5    0.44    0.42
  -6   9  -8   -0.76    0.46
  -6   9  -8    0.59    0.55
   6  -9   8    0.83    0.48
   6  -9   8    0.20    0.44
 -10   4   6    0.22    0.52
 -10   4   6    0.02    0.50
  10  -4  -6    0.03    0.50
  -9   5   3    3.73    0.75
  -9   5   3    4.20    0.65
  -9   5   3    3.45    0.69
   9  -5  -3    4.41    0.72
  -8   6   0    1.31    0.52
  -8   6   0    3.35    0.64
  -8   6   0    3.08    0.59
   8  -6   0    3.88    0.65
  -7   7  -3   -0.25    0.35
  -7   7  -3   -0.04    0.39
  -7   7  -3    0.16    0.46
   7  -7   3    0.16    0.34
   7  -7   3   -0.48    0.37
  -6   8  -6   12.14    1.26
  -6   8  -6   12.10    1.28
   6  -8   6   12.18    1.17
   6  -8   6   11.62    1.15
   6  -8   6   11.70    1.14
  -5   9  -9    0.20    0.53
  -5   9  -9    1.17    0.52
  -5   9  -9    1.28    0.58
   5  -9   9    0.98    0.53
   5  -9   9    0.31    0.49
  -9   4   5    2.45    0.64
  -9   4   5    1.11    0.52
   9  -4  -5    1.02    0.53
  -8   5   2    0.17    0.39
  -8   5   2    0.29    0.45
  -8   5   2    0.28    0.38
   8  -5  -2   -0.28    0.47
   8  -5  -2    0.56    0.44
  -7   6  -1    4.43    0.73
  -7   6  -1    5.87    0.76
  -7   6  -1    6.61    0.77
   7  -6   1    6.06    0.73
   7  -6   1    5.88    0.75
  -6   7  -4    0.34    0.48
  -6   7  -4    0.90    0.45
   6  -7   4    0.13    0.37
   6  -7   4    0.37    0.38
   6  -7   4   -0.02    0.35
  -5   8  -7    0.97    0.53
  -5   8  -7    1.07    0.44
  -5   8  -7    0.88    0.52
   5  -8   7    0.09    0.44
   5  -8   7    1.41    0.47
   5  -8   7    0.88    0.44
  -4   9 -10   -0.60    0.42
  -4   9 -10    0.04    0.48
  -4   9 -10   -0.37    0.49
   4  -9  10   -0.62    0.43
   4  -9  10   -0.17    0.45
  -9   3   7    0.21    0.49
  -9   3   7    0.54    0.49
   9  -3  -7    0.49    0.52
  -8   4   4   11.79    1.28
  -8   4   4   14.47    1.29
  -8   4   4   13.84    1.13
   8  -4  -4   13.12    1.23
  -7   5   1   12.98    1.24
  -7   5   1   13.40    1.23
  -7   5   1   14.26    1.16
   7  -5  -1   12.90    1.19
   7  -5  -1   13.34    1.17
  -6   6  -2   -0.09    0.38
  -6   6  -2    0.27    0.36
   6  -6   2    0.22    0.32
   6  -6   2   -0.17    0.34
  -5   7  -5    1.81    0.57
  -5   7  -5    1.58    0.52
   5  -7   5    1.80    0.47
   5  -7   5    2.15    0.51
   5  -7   5    1.68    0.49
  -4   8  -8    9.40    1.09
  -4   8  -8    9.45    1.03
  -4   8  -8    7.83    1.06
   4  -8   8   10.38    1.05
   4  -8   8   10.98    1.05
   4  -8   8    7.77    1.04
  -3   9 -11   -0.23    0.50
  -3   9 -11    0.70    0.51
  -3   9 -11    0.30    0.53
   3  -9  11    0.73    0.55
   3  -9  11    0.44    0.53
  -9   2   9    0.30    0.56
  -9   2   9    1.50    0.59
   9  -2  -9    1.16    0.60
  -8   3   6    0.12    0.43
  -8   3   6    0.17    0.45
   8  -3  -6    0.26    0.45
  -7   4   3   -0.21    0.35
  -7   4   3    0.01    0.30
  -7   4   3    0.03    0.43
   7  -4  -3    0.30    0.35
   7  -4  -3   -0.01    0.36
  -6   5   0    9.07    0.86
  -6   5   0    9.11    0.83
  -6   5   0    5.14    0.78
   6  -5   0    6.66    0.80
   6  -5   0    9.27    0.81
  -5   6  -3   11.06    1.06
  -5   6  -3   11.97    1.08
   5  -6   3   11.23    0.97
   5  -6   3    9.20    0.96
   5  -6   3   11.34    0.98
  -4   7  -6    6.29    0.84
  -4   7  -6    6.09    0.76
  -4   7  -6    5.87    0.79
   4  -7   6    6.79    0.79
   4  -7   6    5.52    0.78
   4  -7   6    7.14    0.78
  -3   8  -9    2.69    0.68
  -3   8  -9    2.99    0.63
  -3   8  -9    2.19    0.63
   3  -8   9    2.56    0.61
   3  -8   9    3.01    0.64
   3  -8   9    2.58    0.59
  -2   9 -12   -0.07    0.58
  -2   9 -12    0.19    0.53
  -2   9 -12   -0.39    0.44
   2  -9  12    0.73    0.54
   2  -9  12    0.03    0.54
  -8   2   8    2.01    0.65
   8  -2  -8    2.83    0.61
  -7   3   5   16.93    1.44
  -7   3   5   16.96    1.48
   7  -3  -5   18.16    1.46
   7  -3  -5   16.16    1.45
  -6   4   2   19.63    1.56
  -6   4   2   19.24    1.55
  -6   4   2   19.21    1.45
   6  -4  -2   20.90    1.56
   6  -4  -2   19.60    1.52
  -5   5  -1   -0.39    0.31
  -5   5  -1   -0.16    0.27
   5  -5   1    0.17    0.28
   5  -5   1    0.53    0.30
  -4   6  -4    0.51    0.38
  -4   6  -4    0.49    0.32
  -4   6  -4    0.01    0.31
   4  -6   4    0.75    0.33
   4  -6   4    0.31    0.32
   4  -6   4    0.09    0.30
  -3   7  -7   18.63    1.45
  -3   7  -7   17.35    1.51
  -3   7  -7   16.77    1.51
   3  -7   7   18.06    1.47
   3  -7   7   16.47    1.45
   3  -7   7   18.44    1.45
  -2   8 -10    0.22    0.53
  -2   8 -10   -0.89    0.44
  -2   8 -10    0.88    0.49
   2  -8  10    0.79    0.48
   2  -8  10    0.60    0.48
   2  -8  10    0.99    0.48
  -8   1  10    0.74    0.53
  -8   1  10    0.75    0.56
   8  -1 -10    0.28    0.56
  -7   2   7    0.27    0.42
  -7   2   7   -0.03    0.42
   7  -2  -7    0.42    0.44
   7  -2  -7    0.42    0.45
  -6   3   4    0.44    0.40
  -6   3   4    0.09    0.36
  -6   3   4    0.03    0.22
   6  -3  -4    0.61    0.33
   6  -3  -4    0.00    0.32
  -5   4   1  128.40    9.55
  -5   4   1  150.96    9.48
  -5   4   1  151.03    9.53
   5  -4  -1  151.64    9.52
   5  -4  -1  148.03    9.56
  -4   5  -2   14.18    1.11
  -4   5  -2   11.22    1.08
   4  -5   2   12.26    1.03
   4  -5   2   12.33    1.02
   4  -5   2   13.65    1.06
  -3   6  -5    0.06    0.32
  -3   6  -5   -0.22    0.33
  -3   6  -5   -0.38    0.29
   3  -6   5    0.31    0.33
   3  -6   5   -0.42    0.28
   3  -6   5    0.33    0.30
  -2   7  -8   10.00    0.92
  -2   7  -8    9.23    0.99
  -2   7  -8    6.10    0.92
   2  -7   8    8.53    0.93
   2  -7   8    5.74    0.86
   2  -7   8    7.72    0.86
  -1   8 -11    1.90    0.69
  -1   8 -11    2.79    0.69
  -1   8 -11    2.63    0.64
   1  -8  11    2.23    0.60
   1  -8  11    1.55    0.61
   1  -8  11    1.20    0.56
  -7   1   9    0.90    0.48
  -7   1   9   -0.64    0.39
   7  -1  -9   -0.03    0.44
  -6   2   6   63.75    4.23
  -6   2   6   62.45    4.14
   6  -2  -6   56.54    4.14
   6  -2  -6   59.85    4.21
  -5   3   3   43.88    3.17
  -5   3   3   47.29    3.14
  -5   3   3   46.36    3.04
   5  -3  -3   46.42    3.12
   5  -3  -3   44.59    3.15
  -4   4   0   34.55    2.58
  -4   4   0   40.08    2.60
   4  -4   0   35.60    2.53
   4  -4   0   38.47    2.58
  -3   5  -3   13.46    1.08
  -3   5  -3   14.26    1.13
  -3   5  -3   13.08    1.13
   3  -5   3   13.99    1.11
   3  -5   3   13.56    1.08
   3  -5   3   13.92    1.07
  -2   6  -6    0.30    0.33
  -2   6  -6    0.08    0.36
  -2   6  -6    0.12    0.37
   2  -6   6    0.53    0.34
   2  -6   6    0.34    0.32
   2  -6   6    0.14    0.30
  -1   7  -9    0.34    0.41
  -1   7  -9   -0.09    0.40
  -1   7  -9    0.51    0.46
   1  -7   9    0.16    0.44
   1  -7   9   -0.14    0.40
   1  -7   9    0.07    0.41
   0   8 -12    0.55    0.55
   0   8 -12    1.76    0.67
   0   8 -12    1.41    0.60
   0  -8  12    0.94    0.59
   0  -8  12    1.20    0.65
   0  -8  12    0.53    0.52
  -7   0  11    5.69    0.79
  -7   0  11    2.35    0.76
  -7   0  11    3.56    0.75
   7   0 -11    3.90    0.81
  -6   1   8   -0.03    0.41
  -6   1   8   -0.08    0.41
   6  -1  -8    0.24    0.42
   6  -1  -8    0.82    0.47
  -5   2   5    0.35    0.38
  -5   2   5    0.43    0.34
   5  -2  -5    0.30    0.34
   5  -2  -5    0.29    0.33
  -4   3   2    8.41    0.80
  -4   3   2   10.34    0.70
   4  -3  -2    6.19    0.77
   4  -3  -2    9.71    0.79
  -3   4  -1   10.99    0.95
  -3   4  -1   12.59    0.96
   3  -4   1   10.31    0.89
   3  -4   1   12.58    0.93
   3  -4   1   10.30    0.89
  -2   5  -4   30.27    2.10
  -2   5  -4   27.00    2.06
  -2   5  -4   28.98    2.04
   2  -5   4   29.05    2.07
   2  -5   4   30.69    2.05
   2  -5   4   28.62    2.03
  -1   6  -7    1.39    0.44
  -1   6  -7    1.30    0.41
  -1   6  -7    1.66    0.48
   1  -6   7    0.63    0.43
   1  -6   7    0.89    0.38
   1  -6   7    0.56    0.38
   0   7 -10    4.05    0.74
   0   7 -10    3.57    0.76
   0   7 -10    3.48    0.72
   0  -7  10    3.45    0.72
   0  -7  10    4.30    0.73
   0  -7  10    4.56    0.69
  -6   0  10    0.61    0.44
  -6   0  10    0.32    0.50
  -6   0  10   -0.50    0.43
   6   0 -10    0.18    0.47
   6   0 -10   -0.41    0.43
  -5   1   7    0.90    0.40
  -5   1   7    1.54    0.47
   5  -1  -7    0.82    0.42
   5  -1  -7    1.20    0.46
  -4   2   4    1.19    0.33
  -4   2   4    0.94    0.34
   4  -2  -4    1.09    0.33
   4  -2  -4    1.12    0.34
  -3   3   1    2.35    0.41
  -3   3   1    4.39    0.49
   3  -3  -1    5.03    0.46
   3  -3  -1    3.53    0.45
  -2   4  -2   18.64    1.41
  -2   4  -2   20.04    1.44
  -2   4  -2   19.08    1.38
   2  -4   2   18.43    1.36
   2  -4   2   20.05    1.39
   2  -4   2   19.67    1.42
  -1   5  -5   23.25    1.81
  -1   5  -5   24.93    1.81
  -1   5  -5   25.48    1.76
   1  -5   5   20.98    1.79
   1  -5   5   25.69    1.77
   1  -5   5   26.26    1.76
   0   6  -8    0.39    0.42
   0   6  -8    0.86    0.44
   0   6  -8    0.72    0.39
   0  -6   8    0.50    0.39
   0  -6   8    0.30    0.39
   0  -6   8    0.34    0.41
   1   7 -11   -0.32    0.48
   1   7 -11    0.27    0.54
   1   7 -11   -0.77    0.46
  -1  -7  11    0.34    0.50
  -1  -7  11    0.04    0.44
  -1  -7  11    0.01    0.45
  -6  -1  12    0.25    0.56
  -6  -1  12    0.85    0.56
   6   1 -12    0.64    0.55
   6   1 -12   -0.25    0.52
  -5   0   9    3.32    0.57
  -5   0   9    2.57    0.63
   5   0  -9    3.56    0.70
   5   0  -9    2.64    0.58
  -4   1   6    0.46    0.35
  -4   1   6    0.30    0.32
   4  -1  -6   -0.70    0.26
   4  -1  -6   -0.35    0.28
  -3   2   3   10.29    0.87
  -3   2   3   10.46    0.74
  -3   2   3   11.40    0.91
   3  -2  -3   10.97    0.91
   3  -2  -3   11.43    0.87
  -2   3   0   37.96    2.48
  -2   3   0   34.96    2.48
   2  -3   0   37.76    2.48
   2  -3   0   35.96    2.45
  -1   4  -3   17.95    1.38
  -1   4  -3   18.78    1.38
  -1   4  -3   18.19    1.34
   1  -4   3   18.85    1.35
   1  -4   3   19.52    1.39
   1  -4   3   18.97    1.33
   0   5  -6   77.62    5.15
   0   5  -6   81.04    5.21
   0   5  -6   73.21    5.20
   0  -5   6   76.13    5.19
   0  -5   6   74.44    5.13
   0  -5   6   82.43    5.16
   1   6  -9   35.15    2.55
   1   6  -9   30.22    2.58
   1   6  -9   36.51    2.62
  -1  -6   9   35.72    2.54
  -1  -6   9   34.36    2.63
  -1  -6   9   36.36    2.53
   2   7 -12    2.28    0.69
   2   7 -12    1.76    0.67
  -2  -7  12    1.83    0.63
  -2  -7  12    2.03    0.71
  -2  -7  12    1.69    0.61
  -5  -1  11    1.95    0.64
  -5  -1  11    1.72    0.62
   5   1 -11    2.15    0.59
   5   1 -11    2.05    0.68
  -4   0   8    2.33    0.56
  -4   0   8    1.78    0.41
   4   0  -8    2.30    0.56
   4   0  -8    2.40    0.49
  -3   1   5   15.72    1.22
  -3   1   5   14.53    1.14
   3  -1  -5   15.41    1.18
   3  -1  -5   15.68    1.26
  -2   2   2    3.03    0.39
   2  -2  -2    2.71    0.39
   2  -2  -2    3.22    0.37
  -1   3  -1  115.58    7.57
  -1   3  -1  117.30    7.61
  -1   3  -1  124.81    7.60
   1  -3   1  120.99    7.60
   1  -3   1  111.13    7.56
   1  -3   1  112.43    7.57
   0   4  -4   57.45    3.59
   0   4  -4   52.47    3.54
   0   4  -4   51.14    3.59
   0  -4   4   56.44    3.59
   0  -4   4   51.37    3.54
   0  -4   4   50.22    3.52
   1   5  -7    3.61    0.61
   1   5  -7    4.10    0.58
   1   5  -7    2.86    0.55
  -1  -5   7    4.09    0.55
  -1  -5   7    2.51    0.55
  -1  -5   7    2.88    0.50
   2   6 -10    1.01    0.51
   2   6 -10    1.24    0.53
   2   6 -10    0.85    0.53
  -2  -6  10   -0.04    0.40
  -2  -6  10    1.03    0.49
  -2  -6  10    0.13    0.50
  -4  -1  10   -0.32    0.30
  -4  -1  10   -0.18    0.38
  -4  -1  10   -0.41    0.38
   4   1 -10   -0.32    0.41
   4   1 -10   -0.32    0.42
  -3   0   7   61.00    4.02
  -3   0   7   59.89    4.17
   3   0  -7   61.63    4.11
   3   0  -7   60.87    4.18
  -2   1   4   68.76    4.57
  -2   1   4   72.40    4.65
   2  -1  -4   68.85    4.66
   2  -1  -4   70.39    4.61
  -1   2   1   42.19    2.83
  -1   2   1   44.98    2.84
   1  -2  -1   40.45    2.80
   1  -2  -1   43.84    2.84
   0   3  -2  111.09    7.24
   0   3  -2  111.05    7.25
   0   3  -2  113.01    7.28
   0  -3   2  111.96    7.24
   0  -3   2  110.07    7.23
   0  -3   2  113.71    7.26
   1   4  -5   24.53    1.75
   1   4  -5   23.66    1.78
   1   4  -5   24.29    1.77
  -1  -4   5   24.98    1.73
  -1  -4   5   24.42    1.80
  -1  -4   5   24.56    1.73
   2   5  -8   10.88    1.07
   2   5  -8   11.80    1.10
   2   5  -8    9.83    1.05
  -2  -5   8   12.34    1.03
  -2  -5   8    9.21    1.09
  -2  -5   8   11.36    1.03
   3   6 -11    0.16    0.49
   3   6 -11    0.70    0.52
  -3  -6  11   -0.28    0.40
  -3  -6  11    0.23    0.50
  -3  -6  11   -1.02    0.36
  -4  -2  12    0.62    0.53
  -4  -2  12    0.86    0.55
   4   2 -12   -0.32    0.45
   4   2 -12   -0.22    0.44
   4   2 -12    0.07    0.51
  -3  -1   9    2.67    0.42
  -3  -1   9    2.33    0.55
  -3  -1   9    3.31    0.64
   3   1  -9    2.55    0.58
   3   1  -9    2.70    0.54
  -2   0   6   27.92    2.13
  -2   0   6   31.43    2.02
   2   0  -6   30.59    2.16
   2   0  -6   29.65    2.10
  -1   1   3   69.34    4.40
   1  -1  -3   69.16    4.41
   1  -1  -3   62.41    4.36
   0   2   0   23.58    1.63
   0   2   0   24.57    1.66
   0   2   0   26.06    1.64
   0  -2   0   24.73    1.65
   0  -2   0   23.90    1.62
   1   3  -3  139.48    8.03
   1   3  -3  121.80    8.04
   1   3  -3  120.61    8.00
  -1  -3   3  115.49    7.98
  -1  -3   3  119.92    7.98
   2   4  -6    6.23    0.71
   2   4  -6    7.62    0.76
   2   4  -6    6.62    0.77
  -2  -4   6    6.75    0.68
  -2  -4   6    6.94    0.68
  -2  -4   6    6.14    0.76
   3   5  -9   17.66    1.50
   3   5  -9   15.54    1.52
   3   5  -9   17.76    1.51
  -3  -5   9   17.59    1.43
  -3  -5   9   17.38    1.57
  -3  -5   9   17.30    1.42
   4   6 -12    0.89    0.60
   4   6 -12   -0.34    0.53
  -4  -6  12   -0.08    0.50
  -4  -6  12    0.15    0.50
  -4  -6  12   -0.44    0.43
  -3  -2  11    0.06    0.42
  -3  -2  11   -0.04    0.45
   3   2 -11    0.27    0.43
   3   2 -11   -0.67    0.35
   3   2 -11    0.38    0.49
  -2  -1   8    0.34    0.35
  -2  -1   8   -0.13    0.33
  -2  -1   8   -0.07    0.22
   2   1  -8    0.48    0.33
   2   1  -8    0.33    0.35
  -1   0   5    0.46    0.25
  -1   0   5    0.08    0.17
   1   0  -5    0.67    0.29
   1   0  -5    0.09    0.22
   0   1   2    6.42    0.49
   0   1   2    6.70    0.53
   0  -1  -2    6.90    0.55
   0  -1  -2    6.98    0.50
   0  -1  -2    6.93    0.52
   1   2  -1    3.63    0.34
   1   2  -1    3.95    0.41
  -1  -2   1    3.15    0.30
  -1  -2   1    4.54    0.38
  -1  -2   1    3.64    0.30
  -1  -2   1    4.15    0.34
   2   3  -4   29.05    2.01
   2   3  -4   29.56    2.00
   2   3  -4   28.21    2.05
  -2  -3   4   28.33    1.96
  -2  -3   4   29.77    1.97
  -2  -3   4   27.79    2.03
   3   4  -7    2.99    0.54
   3   4  -7    3.08    0.54
   3   4  -7    3.68    0.63
  -3  -4   7    3.24    0.50
  -3  -4   7    2.66    0.58
  -3  -4   7    3.56    0.52
   4   5 -10    3.58    0.74
   4   5 -10    3.38    0.73
  -4  -5  10    3.11    0.71
  -4  -5  10    4.50    0.66
  -4  -5  10    3.69    0.66
  -3  -3  13    0.80    0.62
  -3  -3  13   -0.13    0.50
   3   3 -13    0.23    0.46
   3   3 -13    0.62    0.58
   3   3 -13    0.48    0.51
  -2  -2  10    0.63    0.42
  -2  -2  10    0.07    0.37
   2   2 -10   -0.26    0.34
   2   2 -10    0.31    0.41
   2   2 -10   -0.21    0.43
  -1  -1   7   11.46    1.00
  -1  -1   7   11.42    0.80
  -1  -1   7   11.54    1.00
   1   1  -7   11.64    0.98
   1   1  -7    9.85    1.03
   1   1  -7   13.09    0.94
   0   0   4    1.60    0.27
   0   0  -4    1.31    0.29
   0   0  -4    1.05    0.24
   1   1   1    9.82    0.71
  -1  -1  -1    9.42    0.75
   2   2  -2    9.24    0.70
  -2  -2   2    9.64    0.67
  -2  -2   2    9.73    0.69
  -2  -2   2    8.99    0.73
  -2  -2   2    9.65    0.67
  -2  -2   2    9.87    0.76
   3   3  -5    3.79    0.49
   3   3  -5    3.57    0.56
   3   3  -5    4.03    0.51
  -3  -3   5    4.09    0.51
  -3  -3   5    3.64    0.46
  -3  -3   5    3.98    0.45
  -3  -3   5    3.63    0.53
   4   4  -8   21.58    1.83
   4   4  -8   23.88    1.92
   4   4  -8   25.31    1.85
  -4  -4   8   24.06    1.76
  -4  -4   8   21.75    1.90
  -4  -4   8   24.66    1.77
   5   5 -11   -0.30    0.53
   5   5 -11   -0.70    0.48
  -5  -5  11    0.53    0.43
  -5  -5  11    0.70    0.57
  -5  -5  11    0.74    0.48
  -2  -3  12    2.77    0.63
  -2  -3  12    1.62    0.60
   2   3 -12    1.94    0.66
   2   3 -12    1.93    0.56
   2   3 -12    1.69    0.51
  -1  -2   9    6.90    0.86
  -1  -2   9    7.20    0.90
   1   2  -9    6.93    0.81
   1   2  -9    8.66    0.77
   1   2  -9    8.51    0.99
   0  -1   6   29.07    1.91
   0  -1   6   23.54    1.88
   0   1  -6   28.79    1.82
   0   1  -6   28.02    1.86
   0   1  -6   23.98    1.93
  -1   0  -3   93.46    6.13
  -1   0  -3   98.47    6.13
  -1   0  -3   91.74    6.07
  -2  -1   0   13.26    0.96
  -2  -1   0   13.44    1.00
   3   2  -3    1.08    0.24
   3   2  -3    0.70    0.23
  -3  -2   3    0.62    0.18
  -3  -2   3    0.99    0.29
  -3  -2   3    1.21    0.29
  -3  -2   3    1.11    0.21
   4   3  -6    1.05    0.35
   4   3  -6    0.75    0.42
   4   3  -6    0.75    0.35
  -4  -3   6    0.16    0.32
  -4  -3   6    0.86    0.30
  -4  -3   6    0.58    0.29
  -4  -3   6    0.96    0.40
   5   4  -9   -0.26    0.39
   5   4  -9    0.76    0.50
  -5  -4   9   -0.16    0.37
  -5  -4   9    0.52    0.40
  -5  -4   9   -0.09    0.44
  -1  -3  11    3.43    0.63
  -1  -3  11    2.17    0.59
   1   3 -11    1.95    0.48
   1   3 -11    1.79    0.52
   1   3 -11    2.91    0.68
   0  -2   8   -0.19    0.28
   0  -2   8    0.22    0.34
   0   2  -8    0.18    0.37
   0   2  -8    0.38    0.31
   0   2  -8   -0.07    0.24
   1  -1   5  104.31    7.04
  -1   1  -5  107.09    7.09
  -1   1  -5  113.15    7.02
   2   0   2  235.43   15.05
  -2   0  -2  234.06   15.06
  -2   0  -2  233.62   15.10
  -3  -1   1    0.90    0.18
  -3  -1   1    0.38    0.16
  -3  -1   1   -0.07    0.25
  -3  -1   1    0.56    0.25
   4   2  -4    0.15    0.21
   4   2  -4    0.21    0.23
  -4  -2   4    0.25    0.19
  -4  -2   4    0.41    0.30
  -4  -2   4    0.38    0.28
  -4  -2   4    0.47    0.20
   5   3  -7    6.69    0.85
  -5  -3   7    8.85    0.89
  -5  -3   7    7.54    0.76
  -5  -3   7    7.76    0.94
  -5  -3   7    7.67    0.79
   6   4 -10    0.58    0.51
   6   4 -10   -0.41    0.44
  -6  -4  10   -0.44    0.39
  -6  -4  10   -0.04    0.49
  -6  -4  10   -0.45    0.33
  -1  -4  13    1.78    0.64
   1   4 -13    0.97    0.52
   1   4 -13    1.01    0.65
   1   4 -13    2.16    0.56
   0  -3  10    2.59    0.57
   0  -3  10    2.47    0.55
   0   3 -10    3.12    0.55
   0   3 -10    2.47    0.61
   0   3 -10    3.01    0.49
   1  -2   7    5.27    0.63
   1  -2   7    5.71    0.60
  -1   2  -7    5.69    0.70
  -1   2  -7    4.95    0.52
  -1   2  -7    5.80    0.59
   2  -1   4    9.43    0.73
  -2   1  -4    8.91    0.73
  -2   1  -4    9.06    0.63
  -2   1  -4    8.66    0.64
  -2   1  -4    8.62    0.76
  -2   1  -4    8.93    0.61
   3   0   1   17.80    1.19
  -3   0  -1   17.37    1.26
  -3   0  -1   19.17    1.32
   4   1  -2   14.72    1.01
  -4  -1   2   13.33    0.96
  -4  -1   2   15.36    1.07
  -4  -1   2   13.60    1.12
  -4  -1   2   14.20    1.10
   5   2  -5    3.95    0.53
   5   2  -5    3.89    0.54
  -5  -2   5    3.91    0.43
  -5  -2   5    3.87    0.46
  -5  -2   5    4.10    0.59
  -5  -2   5    3.47    0.58
   6   3  -8    3.14    0.70
   6   3  -8    3.95    0.69
  -6  -3   8    3.00    0.51
  -6  -3   8    4.80    0.60
  -6  -3   8    2.30    0.64
  -6  -3   8    4.46    0.71
   0  -4  12    2.01    0.62
   0   4 -12    1.75    0.51
   0   4 -12    2.02    0.50
   0   4 -12    1.36    0.60
   1  -3   9   13.32    1.18
   1  -3   9   14.25    1.23
  -1   3  -9   14.83    1.11
  -1   3  -9   12.53    1.24
  -1   3  -9   14.66    1.16
   2  -2   6   11.49    0.94
   2  -2   6   11.80    0.98
  -2   2  -6   11.91    0.89
  -2   2  -6   11.43    0.99
  -2   2  -6   12.81    0.89
   3  -1   3   59.38    3.92
  -3   1  -3   59.52    3.98
  -3   1  -3   60.78    3.91
  -3   1  -3   57.62    3.91
  -3   1  -3   61.64    3.91
  -4   0   0   29.53    2.06
  -4   0   0   28.70    2.02
  -4   0   0   29.51    1.95
  -4   0   0   29.20    1.95
   5   1  -3   10.88    0.89
  -5  -1   3   10.31    0.96
  -5  -1   3   11.29    0.82
  -5  -1   3   12.75    0.97
   6   2  -6    7.46    0.81
  -6  -2   6    6.99    0.66
  -6  -2   6    6.88    0.88
  -6  -2   6    7.23    0.72
  -6  -2   6    7.69    0.86
   7   3  -9    0.46    0.52
   7   3  -9    0.77    0.60
  -7  -3   9    2.31    0.51
  -7  -3   9    0.86    0.38
  -7  -3   9    1.54    0.58
  -7  -3   9    0.62    0.56
   1  -4  11    5.32    0.79
  -1   4 -11    4.89    0.65
  -1   4 -11    4.02    0.78
  -1   4 -11    6.20    0.72
   2  -3   8    6.25    0.74
   2  -3   8    6.39    0.72
  -2   3  -8    5.98    0.62
  -2   3  -8    6.02    0.61
  -2   3  -8    5.13    0.74
   3  -2   5   49.34    3.35
  -3   2  -5   51.30    3.30
  -3   2  -5   51.43    3.27
  -3   2  -5   46.97    3.36
  -3   2  -5   50.53    3.38
   4  -1   2   27.79    1.83
  -4   1  -2   27.28    1.95
  -4   1  -2   27.17    1.83
  -4   1  -2   26.38    1.83
  -4   1  -2   28.28    1.88
   5   0  -1    0.76    0.20
  -5   0   1    1.15    0.28
  -5   0   1    0.40    0.21
  -5   0   1    0.70    0.32
  -5   0   1    0.86    0.31
   6   1  -4    1.62    0.36
  -6  -1   4    1.36    0.21
  -6  -1   4    1.67    0.23
  -6  -1   4    2.97    0.51
  -6  -1   4    1.14    0.45
  -6  -1   4    1.73    0.29
   7   2  -7    5.14    0.72
  -7  -2   7    4.21    0.79
  -7  -2   7    5.29    0.62
  -7  -2   7    5.02    0.78
  -7  -2   7    4.77    0.55
   1  -5  13    0.42    0.54
  -1   5 -13   -0.11    0.51
  -1   5 -13    0.22    0.43
   2  -4  10   -0.02    0.39
  -2   4 -10    0.67    0.34
  -2   4 -10    0.59    0.47
  -2   4 -10    0.40    0.31
   3  -3   7   39.16    2.68
   3  -3   7   39.29    2.63
  -3   3  -7   39.27    2.57
  -3   3  -7   37.43    2.59
  -3   3  -7   36.32    2.70
   4  -2   4   13.22    1.00
  -4   2  -4   13.36    1.01
  -4   2  -4   12.95    1.10
  -4   2  -4   13.31    0.98
  -5   1  -1    0.88    0.34
  -5   1  -1    1.04    0.31
  -5   1  -1    0.40    0.20
  -5   1  -1    1.35    0.25
  -5   1  -1    1.09    0.23
   6   0  -2    0.18    0.23
  -6   0   2    0.33    0.36
  -6   0   2    0.31    0.34
  -6   0   2    0.30    0.27
   7   1  -5    1.97    0.45
  -7  -1   5    1.88    0.34
  -7  -1   5    1.75    0.26
  -7  -1   5    1.15    0.51
  -7  -1   5    3.12    0.57
   8   2  -8   -0.27    0.45
  -8  -2   8    0.02    0.52
  -8  -2   8    0.24    0.50
  -8  -2   8    0.12    0.28
   2  -5  12    6.40    0.88
  -2   5 -12    5.18    0.95
  -2   5 -12    6.02    0.74
   3  -4   9    2.60    0.54
  -3   4  -9    1.94    0.41
  -3   4  -9    2.25    0.41
  -3   4  -9    1.44    0.50
   4  -3   6   19.80    1.47
  -4   3  -6   19.40    1.43
  -4   3  -6   18.95    1.50
  -4   3  -6   20.54    1.37
  -4   3  -6   19.30    1.53
   5  -2   3   30.68    2.05
   5  -2   3   30.97    2.08
  -5   2  -3   29.32    2.19
  -5   2  -3   32.59    2.12
  -5   2  -3   29.56    2.10
  -5   2  -3   30.30    2.12
  -6   1   0    0.22    0.23
   7   0  -3   -0.23    0.29
  -7   0   3    0.25    0.38
  -7   0   3    0.00    0.32
  -7   0   3    0.22    0.39
   8   1  -6    2.23    0.54
  -8  -1   6    2.13    0.60
  -8  -1   6    1.94    0.60
  -8  -1   6    1.97    0.58
   3  -5  11   -0.13    0.41
  -3   5 -11   -0.12    0.33
  -3   5 -11    0.71    0.46
  -3   5 -11    0.01    0.31
   4  -4   8    3.01    0.57
  -4   4  -8    3.61    0.49
  -4   4  -8    3.90    0.36
  -4   4  -8    2.28    0.55
   5  -3   5    1.41    0.34
   5  -3   5    1.25    0.30
  -5   3  -5    1.67    0.33
  -5   3  -5    1.46    0.37
  -5   3  -5    1.61    0.44
   6  -2   2   38.46    2.65
   6  -2   2   37.64    2.65
  -6   2  -2   42.06    2.72
  -6   2  -2   45.37    2.91
  -6   2  -2   39.86    2.80
  -6   2  -2   37.03    2.73
   7  -1  -1    1.25    0.32
  -7   1   1    2.12    0.49
  -7   1   1    2.35    0.50
  -7   1   1    1.81    0.40
   8   0  -4   12.36    1.15
  -8   0   4   14.72    1.26
  -8   0   4   12.95    1.23
   9   1  -7    3.47    0.82
  -9  -1   7    2.30    0.69
  -9  -1   7    2.61    0.67
   3  -6  13    0.17    0.49
   3  -6  13   -0.62    0.48
  -3   6 -13    0.42    0.56
  -3   6 -13    0.19    0.43
   4  -5  10    0.73    0.44
   4  -5  10    1.09    0.48
  -4   5 -10    0.13    0.43
  -4   5 -10    1.35    0.35
  -4   5 -10    0.98    0.39
   5  -4   7    3.79    0.55
   5  -4   7    3.11    0.55
  -5   4  -7    4.21    0.64
  -5   4  -7    4.30    0.47
  -5   4  -7    3.84    0.63
  -5   4  -7    4.35    0.57
   6  -3   4    3.34    0.43
   6  -3   4    3.23    0.44
  -6   3  -4    2.23    0.45
  -6   3  -4    3.39    0.48
  -6   3  -4    4.35    0.61
   7  -2   1   92.73    6.16
  -7   2  -1   93.22    6.29
  -7   2  -1   94.84    6.23
  -7   2  -1   96.54    6.27
   8  -1  -2   -0.54    0.28
  -8   1   2    0.34    0.35
  -8   1   2    0.35    0.41
  -8   1   2    0.36    0.41
  -9   0   5    0.41    0.51
  -9   0   5    0.48    0.45
   4  -6  12    2.25    0.65
   4  -6  12    1.23    0.55
  -4   6 -12    1.32    0.42
  -4   6 -12    1.96    0.65
   5  -5   9    0.50    0.40
   5  -5   9    1.80    0.50
  -5   5  -9    1.18    0.45
  -5   5  -9    0.70    0.45
  -5   5  -9    0.89    0.35
   6  -4   6    2.03    0.41
   6  -4   6    1.37    0.39
  -6   4  -6    1.32    0.36
  -6   4  -6    1.05    0.42
  -6   4  -6    1.33    0.49
   7  -3   3    5.27    0.57
   7  -3   3    5.73    0.54
  -7   3  -3    4.95    0.66
  -7   3  -3    4.60    0.71
  -7   3  -3    3.99    0.62
   8  -2   0    0.58    0.29
  -8   2   0    0.52    0.33
  -8   2   0    0.36    0.41
  -8   2   0   -0.55    0.42
  -9   1   3    0.76    0.44
  -9   1   3    1.77    0.53
  -9   1   3    0.93    0.52
 -10   0   6    0.67    0.50
 -10   0   6    0.35    0.60
   5  -6  11    3.99    0.71
   5  -6  11    3.52    0.71
  -5   6 -11    2.94    0.72
   6  -5   8    0.50    0.38
   6  -5   8    0.15    0.35
  -6   5  -8   -0.31    0.33
  -6   5  -8    0.06    0.39
  -6   5  -8    1.18    0.30
  -6   5  -8    0.35    0.40
   7  -4   5   66.45    4.41
   7  -4   5   61.56    4.38
  -7   4  -5   67.85    4.42
  -7   4  -5   66.47    4.54
  -7   4  -5   66.83    4.48
  -8   3  -2   11.10    1.06
  -8   3  -2   10.60    0.99
  -8   3  -2   11.03    1.16
  -9   2   1    4.57    0.69
  -9   2   1    3.69    0.72
  -9   2   1    5.20    0.77
 -10   1   4    0.28    0.50
 -10   1   4    0.28    0.44
   6  -6  10    3.87    0.67
   6  -6  10    3.04    0.63
  -6   6 -10    2.27    0.60
  -6   6 -10    1.21    0.55
  -6   6 -10    2.80    0.55
   7  -5   7    0.67    0.38
  -7   5  -7    1.06    0.38
  -7   5  -7    0.31    0.44
  -7   5  -7    0.64    0.41
   8  -4   4    0.80    0.31
  -8   4  -4    0.26    0.40
  -8   4  -4    1.01    0.42
  -8   4  -4    0.33    0.43
  -8   4  -4    0.48    0.38
  -9   3  -1    3.58    0.67
  -9   3  -1    3.39    0.62
  -9   3  -1    3.23    0.63
 -10   2   2    5.57    0.84
 -10   2   2    6.49    0.91
 -10   2   2    6.22    0.91
   7  -6   9    0.87    0.49
  -7   6  -9    1.34    0.48
  -7   6  -9    1.18    0.52
  -7   6  -9    0.81    0.49
   8  -5   6    0.80    0.40
  -8   5  -6    1.03    0.43
  -8   5  -6    1.09    0.52
  -8   5  -6    1.17    0.43
  -9   4  -3    0.19    0.41
  -9   4  -3    0.66    0.39
  -9   4  -3    0.98    0.47
 -10   3   0    0.23    0.37
 -10   3   0    0.49    0.50
 -10   3   0    0.63    0.54
 -11   2   3    0.58    0.54
 -11   2   3    0.67    0.55
 -11   2   3    0.17    0.48
   8  -6   8    0.49    0.40
  -8   6  -8    0.45    0.42
  -8   6  -8   -0.27    0.46
  -8   6  -8    0.26    0.36
   9  -5   5   -0.28    0.31
  -9   5  -5    0.31    0.42
  -9   5  -5   -0.06    0.41
  -9   5  -5    0.51    0.42
  -9   5  -5    0.49    0.46
 -10   4  -2    1.17    0.51
 -10   4  -2    1.41    0.49
 -10   4  -2    0.58    0.49
 -11   3   1    1.28    0.61
 -11   3   1    2.29    0.62
 -11   3   1    3.78    0.78
   9  -6   7   -0.08    0.38
  -9   6  -7    0.54    0.54
  -9   6  -7    0.36    0.46
  -9   6  -7    0.76    0.44
 -10   5  -4    0.16    0.42
 -10   5  -4   -0.14    0.49
 -10   5  -4    0.73    0.47
 -11   4  -1    3.79    0.78
 -11   4  -1    7.50    0.98
 -11   4  -1    6.51    1.02
  10  -6   6   -0.38    0.31
 -10   6  -6    0.06    0.45
 -10   6  -6   -0.21    0.41
 -10   6  -6    0.77    0.59
 -11   5  -3   -0.58    0.41
 -11   5  -3    0.48    0.56
 -11   5  -3   -0.01    0.43
 -10   9  -3   -0.15    0.50
 -10   9  -3    1.12    0.63
 -10   9  -3    0.24    0.52
  10  -9   3   -0.18    0.47
  -9  10  -6   -0.09    0.63
  -9  10  -6   -0.09    0.48
  -9  10  -6    0.17    0.51
  -9  10  -6    0.01    0.57
   9 -10   6    0.90    0.50
   9 -10   6    0.68    0.53
 -11   7   2    2.12    0.71
 -10   8  -1    0.25    0.56
 -10   8  -1   -0.40    0.43
 -10   8  -1    0.52    0.52
  10  -8   1   -0.30    0.45
  -9   9  -4    8.08    1.09
  -9   9  -4    9.02    1.03
  -9   9  -4    6.67    1.06
  -9   9  -4    8.20    1.21
   9  -9   4    7.69    1.01
  -8  10  -7    0.37    0.57
  -8  10  -7    0.23    0.59
  -8  10  -7   -0.63    0.43
   8 -10   7    0.20    0.49
   8 -10   7    0.35    0.49
 -10   7   1   -0.10    0.47
 -10   7   1    0.44    0.47
 -10   7   1   -0.05    0.50
  10  -7  -1   -0.69    0.47
  -9   8  -2   13.62    1.31
  -9   8  -2   14.52    1.38
  -9   8  -2    9.85    1.33
   9  -8   2   14.20    1.30
  -8   9  -5    0.19    0.51
  -8   9  -5   -0.21    0.42
  -8   9  -5    0.38    0.54
   8  -9   5    1.23    0.51
   8  -9   5    0.00    0.46
  -7  10  -8    0.54    0.63
  -7  10  -8   -0.17    0.53
  -7  10  -8    1.17    0.62
   7 -10   8    0.01    0.46
   7 -10   8    0.29    0.53
 -10   6   3    3.33    0.75
 -10   6   3    4.93    0.92
  10  -6  -3    4.44    0.80
  -9   7   0    0.46    0.50
  -9   7   0    0.21    0.48
  -9   7   0   -0.14    0.48
   9  -7   0   -0.61    0.40
  -8   8  -3    0.33    0.58
  -8   8  -3    0.45    0.45
  -8   8  -3    0.15    0.43
  -8   8  -3    0.19    0.47
   8  -8   3    0.47    0.44
  -7   9  -6    5.71    0.90
  -7   9  -6    4.10    0.80
   7  -9   6    4.78    0.77
   7  -9   6    5.17    0.77
  -6  10  -9    1.29    0.67
  -6  10  -9    0.78    0.59
   6 -10   9    0.11    0.57
   6 -10   9    1.51    0.59
 -10   5   5    0.63    0.55
 -10   5   5    1.20    0.60
  10  -5  -5    2.27    0.66
  -9   6   2    2.32    0.65
  -9   6   2    1.86    0.60
  -9   6   2    2.15    0.54
   9  -6  -2    2.81    0.62
  -8   7  -1    7.46    1.02
  -8   7  -1    8.93    1.02
  -8   7  -1   10.81    1.07
   8  -7   1    9.22    0.99
  -7   8  -4    8.45    1.07
  -7   8  -4   10.53    1.15
   7  -8   4    9.93    1.02
   7  -8   4    6.12    0.99
   7  -8   4    8.35    0.97
  -6   9  -7    3.21    0.75
  -6   9  -7    4.70    0.84
   6  -9   7    3.90    0.73
   6  -9   7    3.80    0.69
  -5  10 -10    1.65    0.65
  -5  10 -10    1.15    0.56
  -5  10 -10    1.58    0.67
   5 -10  10    1.87    0.59
   5 -10  10    0.76    0.59
  -9   5   4    1.35    0.58
  -9   5   4    1.46    0.59
   9  -5  -4    2.44    0.60
  -8   6   1    0.31    0.42
  -8   6   1    0.31    0.40
  -8   6   1   -0.17    0.43
   8  -6  -1    0.39    0.43
   8  -6  -1    0.49    0.41
  -7   7  -2    2.03    0.54
  -7   7  -2    1.92    0.64
  -7   7  -2    2.62    0.56
   7  -7   2    2.50    0.53
   7  -7   2    2.75    0.55
  -6   8  -5    0.81    0.49
  -6   8  -5    1.73    0.59
  -6   8  -5    0.54    0.46
   6  -8   5    2.00    0.51
   6  -8   5    1.04    0.45
   6  -8   5    1.78    0.50
  -5   9  -8   -0.31    0.45
  -5   9  -8    0.01    0.44
  -5   9  -8   -0.18    0.51
   5  -9   8   -0.53    0.41
   5  -9   8   -0.22    0.43
   5  -9   8   -0.31    0.39
  -4  10 -11    0.25    0.53
  -4  10 -11    0.98    0.61
  -4  10 -11    0.31    0.56
   4 -10  11    0.20    0.51
   4 -10  11   -0.51    0.52
  -9   4   6    0.07    0.47
  -9   4   6    0.45    0.57
   9  -4  -6    1.20    0.53
  -8   5   3    0.23    0.34
  -8   5   3    0.09    0.45
  -8   5   3    0.39    0.44
   8  -5  -3    0.32    0.38
   8  -5  -3    0.13    0.41
  -7   6   0    3.65    0.64
  -7   6   0    4.02    0.70
  -7   6   0    3.53    0.60
   7  -6   0    4.63    0.67
   7  -6   0    2.96    0.57
  -6   7  -3    1.01    0.45
  -6   7  -3    1.32    0.53
   6  -7   3    1.29    0.44
   6  -7   3    1.04    0.43
   6  -7   3   -0.05    0.35
  -5   8  -6    2.72    0.54
  -5   8  -6    1.99    0.61
  -5   8  -6    2.08    0.59
   5  -8   6    2.76    0.54
   5  -8   6    2.41    0.58
   5  -8   6    1.79    0.51
  -4   9  -9   -0.54    0.39
  -4   9  -9    0.40    0.49
  -4   9  -9   -0.62    0.47
   4  -9   9    0.24    0.45
   4  -9   9    0.24    0.47
   4  -9   9    0.32    0.44
  -9   3   8    1.03    0.56
  -9   3   8    0.68    0.57
   9  -3  -8    0.61    0.51
  -8   4   5    3.32    0.70
  -8   4   5    3.23    0.68
   8  -4  -5    2.47    0.96
   8  -4  -5    3.48    0.65
  -7   5   2    8.63    0.94
  -7   5   2    7.70    0.81
  -7   5   2    5.96    0.86
   7  -5  -2    7.85    0.87
   7  -5  -2    8.92    0.91
  -6   6  -1    1.03    0.43
  -6   6  -1    0.45    0.45
   6  -6   1    0.76    0.40
   6  -6   1    1.42    0.41
  -5   7  -4    3.83    0.68
  -5   7  -4    3.91    0.68
  -5   7  -4    3.85    0.70
   5  -7   4    3.96    0.60
   5  -7   4    3.48    0.59
   5  -7   4    3.30    0.58
  -4   8  -7    0.67    0.43
  -4   8  -7    1.08    0.53
  -4   8  -7    0.21    0.45
   4  -8   7    1.20    0.48
   4  -8   7    0.75    0.44
   4  -8   7    0.19    0.41
  -3   9 -10    0.15    0.50
  -3   9 -10    0.30    0.45
  -3   9 -10   -0.03    0.46
   3  -9  10   -0.45    0.41
   3  -9  10   -0.08    0.48
   3  -9  10    0.14    0.45
  -8   3   7    1.36    0.53
  -8   3   7    0.02    0.44
   8  -3  -7    0.75    0.49
  -7   4   4    1.69    0.58
  -7   4   4    2.30    0.58
  -7   4   4    3.42    0.42
   7  -4  -4    3.06    0.57
   7  -4  -4    1.70    0.50
  -6   5   1    9.96    0.93
  -6   5   1    8.66    0.99
  -6   5   1   10.32    0.98
   6  -5  -1   10.42    0.97
   6  -5  -1   11.06    0.96
  -5   6  -2   24.50    1.93
  -5   6  -2   28.06    1.98
   5  -6   2   25.97    1.87
   5  -6   2   25.27    1.88
   5  -6   2   24.39    1.90
  -4   7  -5   12.78    1.10
  -4   7  -5   11.32    1.13
  -4   7  -5   11.15    1.15
   4  -7   5   11.72    1.09
   4  -7   5   11.77    1.07
   4  -7   5   11.47    1.08
  -3   8  -8   21.74    1.76
  -3   8  -8   19.62    1.80
  -3   8  -8   22.76    1.83
   3  -8   8   22.23    1.74
   3  -8   8   23.12    1.80
   3  -8   8   20.65    1.76
  -2   9 -11   -0.65    0.52
  -2   9 -11    1.13    0.60
  -2   9 -11    1.63    0.56
   2  -9  11    0.88    0.54
   2  -9  11    1.42    0.61
   2  -9  11    1.00    0.54
  -8   2   9    3.23    0.65
  -8   2   9    1.01    0.60
   8  -2  -9    2.04    0.62
  -7   3   6    0.60    0.42
  -7   3   6    0.10    0.42
   7  -3  -6    0.81    0.47
   7  -3  -6   -0.11    0.39
  -6   4   3    9.54    0.95
  -6   4   3    8.87    1.03
  -6   4   3    9.29    0.78
   6  -4  -3    9.58    0.91
   6  -4  -3    7.88    0.89
  -5   5   0    0.40    0.32
  -5   5   0    0.29    0.35
   5  -5   0    0.10    0.29
   5  -5   0   -0.17    0.28
  -4   6  -3    0.44    0.37
  -4   6  -3   -0.10    0.31
  -4   6  -3    0.01    0.31
   4  -6   3    0.21    0.30
   4  -6   3    0.24    0.32
   4  -6   3    0.33    0.32
  -3   7  -6    0.01    0.42
  -3   7  -6    1.12    0.43
  -3   7  -6   -0.14    0.35
   3  -7   6    1.04    0.41
   3  -7   6    0.65    0.40
   3  -7   6    0.52    0.38
  -2   8  -9   -0.55    0.37
  -2   8  -9   -0.35    0.43
  -2   8  -9    0.22    0.46
   2  -8   9   -0.39    0.39
   2  -8   9    0.54    0.45
   2  -8   9   -0.21    0.38
  -1   9 -12   -0.36    0.46
  -1   9 -12   -0.01    0.55
  -1   9 -12   -0.75    0.53
   1  -9  12   -0.19    0.51
   1  -9  12   -0.11    0.51
   1  -9  12    0.36    0.53
  -7   2   8    2.35    0.61
  -7   2   8    2.48    0.68
   7  -2  -8    3.14    0.70
   7  -2  -8    2.65    0.62
  -6   3   5   15.48    1.27
  -6   3   5   12.52    1.27
   6  -3  -5   17.09    1.27
   6  -3  -5   12.21    1.25
  -5   4   2   47.14    3.19
  -5   4   2   44.88    3.22
  -5   4   2   47.06    3.11
   5  -4  -2   46.79    3.18
  -4   5  -1    1.51    0.38
  -4   5  -1    1.69    0.43
   4  -5   1    1.88    0.36
   4  -5   1    1.09    0.35
  -3   6  -4    3.99    0.57
  -3   6  -4    2.36    0.49
  -3   6  -4    3.97    0.54
   3  -6   4    3.25    0.49
   3  -6   4    2.85    0.53
   3  -6   4    3.66    0.50
  -2   7  -7   14.74    1.30
  -2   7  -7   15.44    1.35
  -2   7  -7   13.14    1.35
   2  -7   7   14.97    1.34
   2  -7   7   15.85    1.30
   2  -7   7   15.98    1.29
  -1   8 -10    0.45    0.53
  -1   8 -10    0.34    0.54
  -1   8 -10    0.45    0.50
   1  -8  10    1.12    0.57
   1  -8  10    1.32    0.52
   1  -8  10    0.69    0.50
  -7   1  10    1.04    0.55
  -6   2   7    9.68    1.06
  -6   2   7   12.66    1.19
   6  -2  -7   12.15    1.15
   6  -2  -7   11.63    1.15
  -5   3   4    6.92    0.73
  -5   3   4    5.39    0.72
  -5   3   4    6.49    0.53
   5  -3  -4    7.59    0.74
   5  -3  -4    5.30    0.70
  -4   4   1   21.02    1.63
  -4   4   1   21.12    1.61
   4  -4  -1   21.99    1.57
   4  -4  -1   22.92    1.61
  -3   5  -2   -0.07    0.27
  -3   5  -2    0.18    0.25
  -3   5  -2    0.75    0.35
   3  -5   2    0.37    0.25
   3  -5   2    0.25    0.27
   3  -5   2   -0.05    0.26
  -2   6  -5   -0.13    0.28
  -2   6  -5   -0.12    0.35
  -2   6  -5   -0.13    0.28
   2  -6   5    0.21    0.30
   2  -6   5    0.03    0.30
   2  -6   5   -0.25    0.27
  -1   7  -8    4.55    0.75
  -1   7  -8    5.77    0.74
  -1   7  -8    5.24    0.81
   1  -7   8    5.26    0.80
   1  -7   8    5.89    0.73
   1  -7   8    5.17    0.75
   0   8 -11    1.00    0.56
   0   8 -11   -0.66    0.50
   0   8 -11    1.35    0.60
   0  -8  11    0.03    0.53
   0  -8  11    0.83    0.51
   0  -8  11    1.08    0.54
  -6   1   9    8.48    1.14
  -6   1   9   11.20    1.03
   6  -1  -9   10.31    1.14
   6  -1  -9    9.21    1.21
  -5   2   6    2.16    0.53
  -5   2   6    3.30    0.57
   5  -2  -6    3.43    0.55
   5  -2  -6    3.15    0.59
  -4   3   3    3.77    0.53
  -4   3   3    3.67    0.50
  -4   3   3    3.55    0.37
   4  -3  -3    4.57    0.58
   4  -3  -3    3.56    0.48
  -3   4   0   16.14    1.18
  -3   4   0   14.00    1.14
   3  -4   0   14.88    1.15
   3  -4   0   14.28    1.11
  -2   5  -3    5.98    0.66
  -2   5  -3    6.79    0.67
  -2   5  -3    6.92    0.72
   2  -5   3    6.73    0.68
   2  -5   3    6.57    0.65
   2  -5   3    6.60    0.64
  -1   6  -6    5.35    0.65
  -1   6  -6    5.61    0.70
  -1   6  -6    5.22    0.72
   1  -6   6    3.97    0.65
   1  -6   6    5.53    0.65
   1  -6   6    4.29    0.59
   0   7  -9    1.92    0.57
   0   7  -9    2.51    0.58
   0   7  -9    1.92    0.58
   0  -7   9    2.11    0.60
   0  -7   9    0.81    0.50
   0  -7   9    1.45    0.48
   1   8 -12    1.42    0.63
   1   8 -12    0.62    0.61
  -1  -8  12    1.29    0.63
  -1  -8  12    0.79    0.51
  -1  -8  12    0.98    0.56
  -6   0  11    0.82    0.53
  -6   0  11    0.55    0.51
   6   0 -11    0.19    0.54
   6   0 -11    1.05    0.54
  -5   1   8    8.44    0.80
  -5   1   8    6.16    0.89
   5  -1  -8    6.08    0.89
   5  -1  -8    7.01    0.84
  -4   2   5    0.55    0.32
  -4   2   5   -0.33    0.31
   4  -2  -5    0.26    0.28
   4  -2  -5    0.12    0.32
  -3   3   2    0.63    0.31
  -3   3   2    2.17    0.38
   3  -3  -2    0.88    0.28
   3  -3  -2    2.47    0.38
  -2   4  -1    6.23    0.60
  -2   4  -1    6.16    0.59
  -2   4  -1    6.12    0.65
   2  -4   1    5.25    0.60
   2  -4   1    6.00    0.58
   2  -4   1    7.00    0.60
  -1   5  -4   -0.04    0.25
  -1   5  -4    0.17    0.26
  -1   5  -4    0.14    0.30
   1  -5   4   -0.20    0.22
   1  -5   4   -0.26    0.24
   1  -5   4    0.43    0.28
   0   6  -7    9.24    0.96
   0   6  -7    6.42    0.88
   0   6  -7    9.69    0.93
   0  -6   7    8.25    0.92
   0  -6   7    7.95    0.85
   0  -6   7    9.77    0.91
   1   7 -10    0.27    0.50
   1   7 -10    0.80    0.49
   1   7 -10   -0.40    0.40
  -1  -7  10    0.16    0.46
  -1  -7  10    0.02    0.37
  -1  -7  10    0.34    0.44
  -5   0  10   -0.21    0.42
  -5   0  10    0.83    0.49
  -5   0  10    0.38    0.41
   5   0 -10    0.27    0.47
   5   0 -10    0.70    0.51
  -4   1   7    2.47    0.54
  -4   1   7    2.60    0.46
   4  -1  -7    2.16    0.52
   4  -1  -7    2.39    0.48
  -3   2   4   12.54    1.00
  -3   2   4   13.85    1.07
   3  -2  -4   13.35    1.06
   3  -2  -4   11.94    1.01
  -2   3   1   16.04    1.19
  -2   3   1   16.49    1.19
   2  -3  -1   16.58    1.20
   2  -3  -1   15.64    1.16
  -1   4  -2   11.68    0.93
  -1   4  -2   11.99    0.88
  -1   4  -2   10.11    0.89
   1  -4   2   11.88    0.86
   1  -4   2   11.26    0.88
   1  -4   2   10.84    0.90
   0   5  -5   83.25    5.28
   0   5  -5   66.45    5.23
   0   5  -5   82.91    5.22
   0  -5   5   75.92    5.25
   0  -5   5   81.22    5.21
   0  -5   5   82.94    5.20
   1   6  -8   17.07    1.55
   1   6  -8   20.44    1.55
   1   6  -8   19.46    1.62
  -1  -6   8   20.15    1.52
  -1  -6   8   16.83    1.57
   2   7 -11    0.02    0.48
   2   7 -11   -0.04    0.53
  -2  -7  11    0.62    0.48
  -2  -7  11    0.14    0.51
  -2  -7  11   -0.43    0.39
  -5  -1  12    1.71    0.64
  -5  -1  12    2.39    0.65
   5   1 -12    2.16    0.64
   5   1 -12    1.37    0.61
   5   1 -12    3.50    0.84
  -4   0   9    1.68    0.54
  -4   0   9    2.05    0.42
   4   0  -9    1.32    0.54
   4   0  -9    1.98    0.50
  -3   1   6    8.19    0.82
  -3   1   6    7.44    0.71
   3  -1  -6    7.67    0.77
   3  -1  -6    8.91    0.86
  -2   2   3   73.93    4.87
   2  -2  -3   73.07    4.89
   2  -2  -3   74.68    4.84
  -1   3   0   51.14    3.22
  -1   3   0   46.85    3.20
  -1   3   0   45.89    3.23
   1  -3   0   53.95    3.24
   1  -3   0   45.66    3.19
   0   4  -3    0.17    0.29
   0   4  -3    0.08    0.22
   0   4  -3    0.74    0.25
   0  -4   3   -0.11    0.22
   0  -4   3    0.24    0.24
   0  -4   3    0.28    0.22
   1   5  -6   44.01    3.01
   1   5  -6   42.52    3.02
   1   5  -6   41.49    2.96
  -1  -5   6   42.48    2.93
  -1  -5   6   41.35    2.93
  -1  -5   6   46.10    3.05
   2   6  -9    3.65    0.68
   2   6  -9    4.17    0.74
   2   6  -9    2.57    0.67
  -2  -6   9    2.97    0.60
  -2  -6   9    3.39    0.59
  -2  -6   9    5.33    0.81
   3   7 -12    0.88    0.60
   3   7 -12    1.94    0.72
  -3  -7  12    1.12    0.56
  -3  -7  12    1.21    0.53
  -3  -7  12    1.23    0.66
  -4  -1  11   -0.26    0.40
  -4  -1  11   -0.37    0.43
   4   1 -11    0.28    0.44
   4   1 -11    0.27    0.50
   4   1 -11    0.93    0.49
  -3   0   8   -0.40    0.33
  -3   0   8    0.06    0.28
   3   0  -8    0.19    0.35
   3   0  -8   -0.25    0.35
  -2   1   5   49.91    3.29
  -2   1   5   51.76    3.39
   2  -1  -5   47.88    3.40
   2  -1  -5   49.52    3.33
  -1   2   2   25.90    1.75
  -1   2   2   24.51    1.74
   1  -2  -2   24.74    1.73
   1  -2  -2   27.45    1.77
   0   3  -1    2.78    0.33
   0   3  -1    3.19    0.33
   0   3  -1    2.76    0.39
   0  -3   1    2.69    0.35
   0  -3   1    2.83    0.31
   0  -3   1    3.12    0.35
   1   4  -4    1.68    0.32
   1   4  -4    2.48    0.38
   1   4  -4    1.09    0.35
  -1  -4   4    1.21    0.29
  -1  -4   4    0.84    0.27
  -1  -4   4    1.97    0.37
   2   5  -7    5.16    0.72
   2   5  -7    6.10    0.72
   2   5  -7    6.13    0.78
  -2  -5   7    7.03    0.71
  -2  -5   7    5.83    0.67
  -2  -5   7    3.85    0.72
   3   6 -10   -0.16    0.45
   3   6 -10   -0.45    0.44
  -3  -6  10   -0.38    0.35
  -3  -6  10   -0.09    0.42
  -3  -6  10   -0.38    0.42
  -4  -2  13    0.31    0.56
  -4  -2  13    0.90    0.62
   4   2 -13    0.72    0.55
   4   2 -13   -0.22    0.44
   4   2 -13   -0.37    0.53
  -3  -1  10    1.21    0.51
  -3  -1  10    1.71    0.52
   3   1 -10    0.47    0.40
   3   1 -10    1.79    0.59
   3   1 -10    1.31    0.49
  -2   0   7   43.42    3.02
  -2   0   7   42.88    2.87
   2   0  -7   44.57    3.05
   2   0  -7   42.58    2.96
  -1   1   4   44.53    2.94
   1  -1  -4   43.21    2.90
   1  -1  -4   43.37    2.95
   0   2   1   77.04    5.12
   0   2   1   82.59    5.14
   0   2   1   77.49    5.14
   0  -2  -1   83.45    5.15
   0  -2  -1   76.73    5.11
   0  -2  -1   78.57    5.11
   1   3  -2   36.81    2.51
   1   3  -2   38.72    2.51
   1   3  -2   36.47    2.56
  -1  -3   2   37.07    2.50
  -1  -3   2   41.97    2.55
  -1  -3   2   35.73    2.48
   2   4  -5    1.99    0.44
   2   4  -5    2.38    0.38
   2   4  -5    1.16    0.34
  -2  -4   5    1.17    0.36
  -2  -4   5    1.43    0.32
  -2  -4   5    1.44    0.30
   3   5  -8    4.50    0.74
   3   5  -8    6.35    0.84
   3   5  -8    6.75    0.82
  -3  -5   8    5.18    0.82
  -3  -5   8    6.79    0.75
  -3  -5   8    6.16    0.72
   4   6 -11    0.57    0.56
   4   6 -11    1.65    0.65
  -4  -6  11    0.15    0.48
  -4  -6  11    0.26    0.53
  -4  -6  11   -0.29    0.38
  -3  -2  12    0.39    0.49
  -3  -2  12   -0.09    0.44
   3   2 -12    0.37    0.45
   3   2 -12    0.27    0.50
   3   2 -12   -0.36    0.38
  -2  -1   9    3.06    0.35
  -2  -1   9    3.29    0.61
  -2  -1   9    2.60    0.56
   2   1  -9    3.87    0.53
   2   1  -9    2.35    0.59
   2   1  -9    3.28    0.55
  -1   0   6   11.72    0.82
  -1   0   6   11.66    0.96
   1   0  -6   11.01    0.93
   1   0  -6   11.62    1.00
   0   1   3    8.21    0.61
   0  -1  -3    7.71    0.58
   0  -1  -3    6.86    0.57
   0  -1  -3    7.81    0.65
   1   2   0    9.76    0.77
  -1  -2   0   10.32    0.71
  -1  -2   0    9.84    0.70
   2   3  -3  123.88    8.06
   2   3  -3  124.23    8.04
   2   3  -3  126.78    8.12
  -2  -3   3  123.47    8.09
  -2  -3   3  123.08    8.03
  -2  -3   3  123.29    8.01
   3   4  -6    0.61    0.33
   3   4  -6    0.19    0.32
   3   4  -6    0.21    0.37
  -3  -4   6    0.46    0.37
  -3  -4   6    0.32    0.28
  -3  -4   6    0.26    0.27
   4   5  -9    6.06    0.94
   4   5  -9    8.28    0.99
  -4  -5   9    8.07    0.85
  -4  -5   9    6.14    0.95
  -4  -5   9    8.59    0.88
  -2  -2  11    1.02    0.53
  -2  -2  11    0.23    0.42
   2   2 -11    0.85    0.39
   2   2 -11    0.61    0.43
   2   2 -11    1.38    0.58
  -1  -1   8    1.00    0.41
  -1  -1   8    1.16    0.37
   1   1  -8    1.14    0.37
   1   1  -8    0.69    0.41
   1   1  -8    1.24    0.32
   0   0   5    1.45    0.29
   0   0  -5    1.30    0.28
   0   0  -5    1.23    0.33
   0   0  -5    1.56    0.22
   1   1   2   24.46    1.64
  -1  -1  -2   25.76    1.65
  -1  -1  -2   25.53    1.65
  -1  -1  -2   24.06    1.69
  -2  -2   1    2.77    0.30
  -2  -2   1    2.81    0.31
   3   3  -4    0.87    0.28
   3   3  -4    1.58    0.32
   3   3  -4    2.08    0.43
  -3  -3   4    2.05    0.28
  -3  -3   4    1.49    0.27
  -3  -3   4    2.07    0.37
  -3  -3   4    0.84    0.31
   4   4  -7    8.26    1.02
   4   4  -7    8.83    0.93
   4   4  -7    8.23    0.90
  -4  -4   7    9.80    1.03
  -4  -4   7    9.23    0.83
  -4  -4   7    9.43    0.85
   5   5 -10   -0.80    0.46
   5   5 -10    0.02    0.55
  -5  -5  10    0.48    0.52
  -5  -5  10   -0.33    0.43
  -5  -5  10    0.44    0.41
  -2  -3  13   -0.43    0.44
   2   3 -13    1.01    0.60
   2   3 -13    0.92    0.48
   2   3 -13    0.60    0.47
  -1  -2  10   -0.30    0.33
  -1  -2  10    0.08    0.41
   1   2 -10   -0.58    0.26
   1   2 -10    0.27    0.40
   1   2 -10   -0.11    0.33
   0  -1   7    2.51    0.43
   0  -1   7    2.70    0.46
   0   1  -7    1.97    0.49
   0   1  -7    2.62    0.33
   0   1  -7    3.29    0.43
  -1   0  -4    3.44    0.41
  -1   0  -4    3.18    0.31
  -1   0  -4    3.35    0.40
  -2  -1  -1    1.61    0.27
  -2  -1  -1    2.04    0.33
   3   2  -2   18.13    1.22
  -3  -2   2   18.07    1.30
  -3  -2   2   16.50    1.26
  -3  -2   2   18.11    1.19
   4   3  -5   27.63    1.91
   4   3  -5   26.60    1.90
   4   3  -5   28.67    2.02
  -4  -3   5   27.25    1.84
  -4  -3   5   23.04    1.95
  -4  -3   5   26.44    1.94
  -4  -3   5   27.23    1.85
   5   4  -8    0.15    0.41
   5   4  -8    0.32    0.44
  -5  -4   8    0.56    0.36
  -5  -4   8    0.05    0.33
  -5  -4   8    0.48    0.46
  -1  -3  12   -0.38    0.45
   1   3 -12    1.01    0.47
   1   3 -12    0.35    0.51
   1   3 -12    0.20    0.37
   0  -2   9    1.02    0.43
   0  -2   9    0.17    0.34
   0   2  -9    0.73    0.35
   0   2  -9    0.16    0.42
   0   2  -9    0.12    0.25
   1  -1   6   10.00    0.82
   1  -1   6   10.01    0.86
  -1   1  -6   10.21    0.73
  -1   1  -6   10.52    0.79
  -1   1  -6    9.11    0.89
   2   0   3   28.29    1.94
  -2   0  -3   28.09    1.92
  -2   0  -3   30.48    1.92
  -2   0  -3   28.46    1.91
  -2   0  -3   29.34    1.99
  -3  -1   0    3.73    0.43
  -3  -1   0    4.39    0.50
   4   2  -3    8.92    0.71
  -4  -2   3    8.28    0.64
  -4  -2   3    9.51    0.77
  -4  -2   3    7.90    0.78
   5   3  -6    8.07    0.83
  -5  -3   6    8.65    0.90
  -5  -3   6    8.13    0.87
  -5  -3   6    6.88    0.69
  -5  -3   6    7.16    0.71
   6   4  -9    0.58    0.50
   6   4  -9    0.38    0.53
  -6  -4   9    0.25    0.46
  -6  -4   9   -0.54    0.34
  -6  -4   9   -0.10    0.33
   0  -3  11    0.20    0.45
   0   3 -11    0.93    0.39
   0   3 -11    0.68    0.39
   0   3 -11    0.34    0.47
   1  -2   8   17.29    1.32
   1  -2   8   17.11    1.36
  -1   2  -8   16.19    1.22
  -1   2  -8   16.57    1.28
  -1   2  -8   17.57    1.42
   2  -1   5    9.25    0.77
  -2   1  -5    9.07    0.79
  -2   1  -5    8.80    0.64
  -2   1  -5    9.11    0.64
  -2   1  -5    9.08    0.79
   3   0   2   99.36    6.48
  -3   0  -2  101.35    6.52
  -3   0  -2  100.46    6.56
  -4  -1   1   14.56    0.97
  -4  -1   1   14.77    0.98
  -4  -1   1   11.09    1.03
  -4  -1   1   11.54    1.06
   5   2  -4    9.97    0.82
  -5  -2   4    8.84    0.67
  -5  -2   4    9.09    0.67
  -5  -2   4    9.18    0.72
  -5  -2   4   10.56    0.90
  -5  -2   4    8.45    0.86
   6   3  -7    0.22    0.38
  -6  -3   7    0.07    0.29
  -6  -3   7    0.09    0.44
  -6  -3   7   -0.38    0.36
  -6  -3   7   -0.01    0.26
   7   4 -10    0.01    0.54
   7   4 -10    1.37    0.60
  -7  -4  10    0.53    0.36
  -7  -4  10    0.05    0.56
   0  -4  13    0.52    0.52
   0   4 -13   -0.02    0.44
   0   4 -13    0.04    0.52
   1  -3  10    0.04    0.42
   1  -3  10    0.33    0.35
  -1   3 -10    0.01    0.33
  -1   3 -10    0.22    0.38
  -1   3 -10    0.29    0.30
   2  -2   7    0.61    0.33
   2  -2   7    0.36    0.24
  -2   2  -7    0.18    0.21
  -2   2  -7    0.34    0.20
  -2   2  -7   -0.27    0.27
   3  -1   4   72.02    4.80
  -3   1  -4   72.70    4.85
  -3   1  -4   70.97    4.76
  -3   1  -4   76.94    4.79
   4   0   1   21.32    1.37
  -4   0  -1   22.26    1.38
  -4   0  -1   20.71    1.48
  -4   0  -1   22.19    1.55
  -4   0  -1   18.68    1.37
   5   1  -2   16.50    1.11
  -5  -1   2   15.13    1.03
  -5  -1   2   16.09    1.22
  -5  -1   2   15.04    1.24
  -5  -1   2   14.51    1.15
   6   2  -5   16.54    1.33
  -6  -2   5   17.28    1.23
  -6  -2   5   17.57    1.17
  -6  -2   5   15.12    1.40
  -6  -2   5   16.71    1.40
  -6  -2   5   16.57    1.16
   7   3  -8    2.11    0.58
  -7  -3   8    1.40    0.34
  -7  -3   8    2.62    0.64
  -7  -3   8    1.24    0.55
  -7  -3   8    1.23    0.42
   1  -4  12   14.32    1.40
  -1   4 -12   16.29    1.33
  -1   4 -12   14.05    1.48
   2  -3   9    0.27    0.32
   2  -3   9   -0.22    0.38
  -2   3  -9   -0.13    0.26
  -2   3  -9    0.01    0.24
  -2   3  -9    0.15    0.38
   3  -2   6    2.13    0.38
  -3   2  -6    2.05    0.23
  -3   2  -6    2.76    0.44
  -3   2  -6    1.70    0.37
  -3   2  -6    1.82    0.28
   4  -1   3   34.14    2.35
  -4   1  -3   33.79    2.45
  -4   1  -3   37.03    2.35
  -4   1  -3   33.33    2.37
  -4   1  -3   37.20    2.34
  -5   0   0    6.44    0.69
  -5   0   0    6.69    0.55
  -5   0   0    6.02    0.71
  -5   0   0    6.89    0.55
   6   1  -3    6.40    0.64
  -6  -1   3    8.26    0.84
  -6  -1   3    6.69    0.53
  -6  -1   3    5.88    0.70
   7   2  -6    0.96    0.42
  -7  -2   6    1.14    0.32
  -7  -2   6    0.68    0.47
  -7  -2   6    0.85    0.21
  -7  -2   6   -0.05    0.41
   8   3  -9    1.09    0.61
   8   3  -9    1.54    0.62
  -8  -3   9    0.82    0.31
  -8  -3   9    0.25    0.60
  -8  -3   9    1.51    0.59
   2  -4  11    2.70    0.62
  -2   4 -11    1.94    0.42
  -2   4 -11    1.00    0.54
  -2   4 -11    2.01    0.47
   3  -3   8    4.16    0.61
  -3   3  -8    4.20    0.63
  -3   3  -8    3.60    0.45
  -3   3  -8    3.76    0.46
   4  -2   5    2.08    0.34
  -4   2  -5    1.52    0.42
  -4   2  -5    1.83    0.28
  -4   2  -5    1.96    0.36
   5  -1   2    2.82    0.30
  -5   1  -2    2.08    0.43
  -5   1  -2    1.85    0.28
  -5   1  -2    2.93    0.41
  -5   1  -2    2.92    0.33
   6   0  -1    2.69    0.35
  -6   0   1    2.59    0.54
  -6   0   1    3.87    0.44
  -6   0   1    3.28    0.43
  -6   0   1    3.07    0.52
   7   1  -4   -0.21    0.28
  -7  -1   4    0.54    0.21
  -7  -1   4    0.34    0.45
  -7  -1   4    0.85    0.39
   8   2  -7    6.14    0.83
  -8  -2   7    5.83    0.89
  -8  -2   7    4.90    0.85
   2  -5  13    3.50    0.77
  -2   5 -13    3.80    0.63
  -2   5 -13    2.46    0.72
   3  -4  10    1.36    0.49
  -3   4 -10    0.86    0.46
  -3   4 -10    1.04    0.35
  -3   4 -10    1.72    0.37
   4  -3   7   22.17    1.61
  -4   3  -7   20.64    1.65
  -4   3  -7   20.33    1.64
  -4   3  -7   21.77    1.52
  -4   3  -7   21.29    1.45
   5  -2   4    0.14    0.21
  -5   2  -4    0.29    0.33
  -5   2  -4   -0.02    0.23
  -5   2  -4   -0.02    0.22
  -5   2  -4    0.20    0.20
   6  -1   1   14.19    0.94
  -6   1  -1   12.99    1.01
  -6   1  -1    9.55    0.89
  -6   1  -1   10.39    0.88
  -6   1  -1   12.18    1.04
   7   0  -2   -0.31    0.25
  -7   0   2    0.02    0.37
  -7   0   2    0.15    0.41
  -7   0   2    0.09    0.30
   8   1  -5    6.26    0.72
  -8  -1   5    3.58    0.72
  -8  -1   5    7.62    0.93
  -9  -2   8    2.90    0.63
  -9  -2   8    1.88    0.66
   3  -5  12   -0.31    0.47
  -3   5 -12    0.11    0.34
  -3   5 -12    0.23    0.49
   4  -4   9    0.44    0.38
  -4   4  -9    0.43    0.39
  -4   4  -9    0.44    0.28
  -4   4  -9    0.30    0.38
   5  -3   6    2.91    0.46
  -5   3  -6    2.08    0.54
  -5   3  -6    2.70    0.39
  -5   3  -6    3.05    0.49
   6  -2   3   24.08    1.65
   6  -2   3   24.08    1.66
  -6   2  -3   24.77    1.70
  -6   2  -3   24.95    1.75
  -6   2  -3   22.25    1.70
  -6   2  -3   24.29    1.84
   7  -1   0   11.65    0.93
  -7   1   0   14.30    1.03
  -7   1   0   11.19    1.14
  -7   1   0   10.67    1.06
  -8   0   3   20.20    1.62
  -8   0   3   21.51    1.71
  -8   0   3   19.28    1.64
  -9  -1   6   -0.04    0.42
  -9  -1   6   -0.03    0.53
   4  -5  11    0.21    0.46
   4  -5  11   -0.39    0.42
  -4   5 -11    0.44    0.30
  -4   5 -11    0.53    0.46
   5  -4   8   45.81    3.00
   5  -4   8   44.06    3.03
  -5   4  -8   43.57    2.86
  -5   4  -8   42.21    3.07
  -5   4  -8   41.61    3.06
  -5   4  -8   41.22    2.94
   6  -3   5    0.21    0.26
   6  -3   5    0.00    0.23
  -6   3  -5   -0.22    0.27
  -6   3  -5    0.11    0.37
  -6   3  -5    0.29    0.31
   7  -2   2   40.21    2.69
  -7   2  -2   42.50    2.78
  -7   2  -2   40.03    2.87
  -7   2  -2   40.84    2.81
  -7   2  -2   37.14    2.74
  -8   1   1    0.25    0.31
  -8   1   1   -0.08    0.39
  -8   1   1    0.47    0.41
  -9   0   4    0.70    0.51
  -9   0   4    0.16    0.39
   4  -6  13    1.11    0.59
   4  -6  13    0.34    0.56
  -4   6 -13    1.34    0.64
  -4   6 -13    0.78    0.39
   5  -5  10    1.15    0.46
   5  -5  10    0.56    0.43
  -5   5 -10    1.02    0.50
  -5   5 -10    0.36    0.43
  -5   5 -10    1.25    0.51
   6  -4   7   29.87    2.08
   6  -4   7   28.35    2.10
  -6   4  -7   27.18    2.17
  -6   4  -7   29.96    2.02
  -6   4  -7   28.28    2.21
   7  -3   4    9.91    0.89
  -7   3  -4   13.33    1.00
  -7   3  -4   11.02    1.14
  -7   3  -4    9.96    0.99
  -8   2  -1   19.77    1.71
  -8   2  -1   18.82    1.67
  -8   2  -1   24.21    1.64
  -9   1   2    6.02    0.83
  -9   1   2    8.78    1.00
  -9   1   2    8.95    1.00
 -10   0   5   -0.68    0.40
 -10   0   5    0.92    0.61
   5  -6  12    2.56    0.60
   5  -6  12    2.23    0.58
  -5   6 -12    0.30    0.54
  -5   6 -12    0.51    0.48
   6  -5   9    1.11    0.52
   6  -5   9    0.96    0.44
  -6   5  -9    0.95    0.41
  -6   5  -9    1.05    0.50
  -6   5  -9    1.88    0.55
   7  -4   6    0.35    0.33
  -7   4  -6    0.24    0.43
  -7   4  -6    1.28    0.43
  -7   4  -6    0.64    0.35
  -8   3  -3   11.81    1.25
  -8   3  -3   12.57    1.18
  -8   3  -3   15.46    1.20
  -9   2   0    9.55    1.01
  -9   2   0   11.55    1.17
  -9   2   0   11.73    1.16
 -10   1   3    7.80    0.99
 -10   1   3    4.59    0.79
 -10   1   3    5.39    0.89
   6  -6  11   -0.10    0.40
  -6   6 -11    0.01    0.44
  -6   6 -11   -0.05    0.49
   7  -5   8    9.37    1.00
  -7   5  -8    8.45    1.07
  -7   5  -8   10.09    0.86
  -7   5  -8    8.71    1.09
   8  -4   5   16.97    1.35
  -8   4  -5   17.71    1.45
  -8   4  -5   18.05    1.43
  -8   4  -5   17.46    1.57
  -9   3  -2   -0.32    0.40
  -9   3  -2    0.36    0.36
  -9   3  -2    0.64    0.45
 -10   2   1    0.17    0.51
 -10   2   1    0.30    0.40
 -10   2   1   -0.24    0.45
 -11   1   4   -0.14    0.44
 -11   1   4   -0.87    0.53
   7  -6  10    4.42    0.72
  -7   6 -10    3.68    0.76
  -7   6 -10    2.72    0.72
   8  -5   7    9.91    0.93
  -8   5  -7   10.11    0.92
  -8   5  -7    7.31    0.97
  -8   5  -7    8.33    1.07
  -9   4  -4    0.66    0.45
  -9   4  -4    0.61    0.50
  -9   4  -4    1.03    0.45
 -10   3  -1    3.43    0.78
 -10   3  -1    2.64    0.59
 -10   3  -1    5.05    0.76
 -11   2   2    0.83    0.52
 -11   2   2    0.51    0.56
 -11   2   2    1.97    0.65
   8  -6   9   -0.13    0.36
  -8   6  -9   -0.06    0.41
  -8   6  -9   -0.18    0.50
   9  -5   6    6.41    0.72
  -9   5  -6    6.29    0.95
  -9   5  -6    5.01    0.73
  -9   5  -6    3.53    0.71
 -10   4  -3    2.64    0.64
 -10   4  -3    2.79    0.58
 -10   4  -3    2.74    0.68
 -11   3   0    0.23    0.53
 -11   3   0   -0.17    0.38
 -11   3   0    0.09    0.48
   9  -6   8    0.45    0.44
  -9   6  -8    0.69    0.49
  -9   6  -8   -0.32    0.44
 -10   5  -5    0.26    0.47
 -10   5  -5    0.35    0.50
 -10   5  -5    0.94    0.47
 -11   4  -2    2.85    0.70
 -11   4  -2    2.29    0.68
 -11   4  -2    2.22    0.62
  10  -6   7    3.79    0.69
 -10   6  -7    4.58    0.72
 -10   6  -7    3.83    0.82
 -10   6  -7    2.98    0.70
 -11   5  -4    1.51    0.59
 -11   5  -4    0.24    0.53
 -11   5  -4    1.01    0.53
 -10   9  -2    0.69    0.59
 -10   9  -2    0.05    0.51
 -10   9  -2   -0.33    0.47
  10  -9   2    0.56    0.52
  -9  10  -5    3.97    0.82
  -9  10  -5    5.05    0.99
  -9  10  -5    4.48    0.87
  -9  10  -5    3.62    0.79
   9 -10   5    5.12    0.84
 -10   8   0    2.39    0.71
 -10   8   0    2.55    0.77
 -10   8   0    5.57    0.88
  10  -8   0    4.35    0.79
  -9   9  -3    2.32    0.76
  -9   9  -3    1.51    0.62
  -9   9  -3    1.80    0.65
  -9   9  -3    1.95    0.62
   9  -9   3    2.39    0.64
  -8  10  -6   -0.04    0.59
  -8  10  -6    0.19    0.49
  -8  10  -6    0.84    0.59
   8 -10   6    0.05    0.45
   8 -10   6   -0.31    0.46
 -10   7   2    1.67    0.67
 -10   7   2    3.17    0.65
 -10   7   2    2.15    0.68
  10  -7  -2    3.14    0.73
  -9   8  -1   -0.20    0.51
  -9   8  -1    0.09    0.46
  -9   8  -1    0.33    0.50
   9  -8   1   -0.33    0.44
  -8   9  -4    2.80    0.68
  -8   9  -4    4.21    0.85
  -8   9  -4    3.71    0.72
   8  -9   4    3.52    0.69
  -7  10  -7    5.57    0.99
  -7  10  -7    3.91    0.89
   7 -10   7    4.49    0.79
   7 -10   7    4.92    0.82
 -10   6   4   -0.26    0.50
 -10   6   4   -0.60    0.42
  10  -6  -4    0.09    0.51
  -9   7   1   -0.36    0.40
  -9   7   1   -0.52    0.50
  -9   7   1    1.05    0.53
   9  -7  -1    0.09    0.45
  -8   8  -2    0.38    0.48
  -8   8  -2    0.87    0.59
  -8   8  -2    0.14    0.49
  -8   8  -2   -0.45    0.39
   8  -8   2   -0.02    0.44
  -7   9  -5    0.64    0.55
  -7   9  -5    0.60    0.49
   7  -9   5    0.81    0.46
   7  -9   5   -0.61    0.37
  -6  10  -8    0.90    0.57
  -6  10  -8   -0.15    0.55
  -6  10  -8    0.47    0.54
   6 -10   8    0.53    0.54
   6 -10   8    0.66    0.51
 -10   5   6    8.62    1.25
 -10   5   6   10.29    1.24
  10  -5  -6   12.16    1.32
  -9   6   3    0.34    0.51
  -9   6   3    1.38    0.47
  -9   6   3    0.99    0.58
   9  -6  -3    0.76    0.51
  -8   7   0    3.39    0.69
  -8   7   0    3.83    0.66
  -8   7   0    2.33    0.66
   8  -7   0    3.17    0.66
   8  -7   0    3.90    0.67
  -7   8  -3    2.64    0.60
  -7   8  -3    1.58    0.60
   7  -8   3    2.12    0.57
   7  -8   3    1.32    0.51
  -6   9  -6    9.17    1.13
  -6   9  -6    6.44    1.02
  -6   9  -6    7.87    1.09
   6  -9   6    7.71    0.95
   6  -9   6    7.29    0.95
   6  -9   6    7.66    0.92
  -5  10  -9   -0.74    0.49
  -5  10  -9    0.68    0.49
  -5  10  -9   -0.78    0.52
   5 -10   9   -0.37    0.46
   5 -10   9   -0.35    0.44
  -9   5   5    3.63    0.76
  -9   5   5    2.30    0.68
   9  -5  -5    3.05    0.67
  -8   6   2   11.27    1.00
  -8   6   2    9.44    1.06
  -8   6   2    7.85    1.05
   8  -6  -2    7.58    1.02
   8  -6  -2   12.14    1.09
  -7   7  -1    0.97    0.48
  -7   7  -1    0.73    0.44
  -7   7  -1    0.69    0.53
   7  -7   1    0.38    0.41
   7  -7   1    0.68    0.43
  -6   8  -4    0.62    0.49
  -6   8  -4    0.63    0.46
   6  -8   4    0.88    0.44
   6  -8   4    0.85    0.42
   6  -8   4   -1.04    0.33
  -5   9  -7    5.36    0.73
  -5   9  -7    4.58    0.82
  -5   9  -7    4.39    0.80
   5  -9   7    5.32    0.80
   5  -9   7    3.23    0.70
   5  -9   7    4.89    0.72
  -4  10 -10    0.03    0.54
  -4  10 -10    2.80    0.73
  -4  10 -10    0.52    0.54
   4 -10  10    0.76    0.56
   4 -10  10    1.68    0.56
  -9   4   7    0.22    0.51
  -9   4   7    0.10    0.51
   9  -4  -7    0.93    0.50
  -8   5   4    7.71    0.96
  -8   5   4    8.46    0.81
  -8   5   4    7.42    1.05
   8  -5  -4    7.29    0.98
   8  -5  -4   10.16    1.04
  -7   6   1    1.39    0.46
  -7   6   1    1.62    0.55
  -7   6   1    1.67    0.53
   7  -6  -1    1.47    0.48
   7  -6  -1    1.17    0.45
  -6   7  -2   12.90    1.28
  -6   7  -2   16.23    1.42
   6  -7   2   13.65    1.28
   6  -7   2   14.88    1.24
  -5   8  -5    4.49    0.77
  -5   8  -5    6.03    0.86
   5  -8   5    4.96    0.72
   5  -8   5    5.92    0.72
   5  -8   5    4.52    0.74
  -4   9  -8    0.92    0.55
  -4   9  -8    1.30    0.53
  -4   9  -8    2.44    0.67
   4  -9   8    0.59    0.49
   4  -9   8    1.06    0.53
   4  -9   8    1.22    0.51
  -3  10 -11    0.09    0.51
  -3  10 -11   -0.36    0.51
  -3  10 -11   -0.42    0.54
   3 -10  11   -0.42    0.54
   3 -10  11   -0.06    0.50
   3 -10  11   -0.27    0.52
  -8   4   6    0.61    0.50
  -8   4   6    0.62    0.45
   8  -4  -6    1.16    0.71
   8  -4  -6    1.65    0.53
  -7   5   3   23.96    2.11
  -7   5   3   27.50    1.93
  -7   5   3   27.46    2.08
   7  -5  -3   28.60    2.10
   7  -5  -3   28.05    2.06
  -6   6   0    7.50    0.93
  -6   6   0    8.75    1.02
   6  -6   0    7.96    0.89
   6  -6   0    8.69    0.88
  -5   7  -3   -0.41    0.40
  -5   7  -3    0.42    0.41
   5  -7   3    0.47    0.40
   5  -7   3    0.20    0.34
   5  -7   3   -0.06    0.35
  -4   8  -6   13.01    1.35
  -4   8  -6   16.85    1.44
  -4   8  -6   18.08    1.35
   4  -8   6   15.38    1.30
   4  -8   6   14.69    1.30
   4  -8   6   12.32    1.34
  -3   9  -9    1.63    0.61
  -3   9  -9    0.19    0.43
  -3   9  -9    0.92    0.56
   3  -9   9    0.07    0.46
   3  -9   9    0.39    0.47
   3  -9   9    0.54    0.45
  -8   3   8    0.43    0.49
  -8   3   8    0.82    0.50
   8  -3  -8    0.52    0.50
  -7   4   5   -0.03    0.40
  -7   4   5    0.04    0.41
  -7   4   5    0.19    0.36
   7  -4  -5    1.61    0.51
   7  -4  -5    0.41    0.41
  -6   5   2   -0.04    0.28
  -6   5   2    0.06    0.39
  -6   5   2    0.38    0.35
   6  -5  -2    0.29    0.36
   6  -5  -2    0.47    0.38
  -5   6  -1    2.66    0.54
  -5   6  -1    2.52    0.50
   5  -6   1    3.65    0.57
   5  -6   1    2.12    0.47
  -4   7  -4    0.43    0.44
  -4   7  -4    1.42    0.44
  -4   7  -4    0.44    0.38
  -4   7  -4    0.38    0.38
   4  -7   4    0.44    0.39
   4  -7   4    1.51    0.45
   4  -7   4    0.58    0.36
  -3   8  -7    1.04    0.46
  -3   8  -7   -0.02    0.46
  -3   8  -7    0.88    0.48
   3  -8   7    0.10    0.37
   3  -8   7   -0.06    0.39
   3  -8   7    0.22    0.40
  -2   9 -10    0.91    0.56
  -2   9 -10    1.04    0.54
  -2   9 -10    0.52    0.58
   2  -9  10    0.23    0.55
   2  -9  10    0.45    0.45
   2  -9  10    0.52    0.52
  -8   2  10   15.61    1.36
  -8   2  10   12.99    1.56
   8  -2 -10   12.16    1.42
  -7   3   7    2.34    0.65
  -7   3   7    2.72    0.61
   7  -3  -7    2.65    0.61
   7  -3  -7    3.67    0.72
  -6   4   4   10.15    0.86
  -6   4   4   15.17    1.21
  -6   4   4   11.69    1.11
   6  -4  -4    9.52    1.03
   6  -4  -4   13.29    1.13
  -5   5   1    3.24    0.57
  -5   5   1    4.62    0.65
   5  -5  -1    2.93    0.51
   5  -5  -1    3.21    0.49
  -4   6  -2   12.42    1.13
  -4   6  -2   14.13    1.20
   4  -6   2   15.45    1.10
   4  -6   2   11.55    1.10
   4  -6   2   12.90    1.10
  -3   7  -5    3.97    0.62
  -3   7  -5    3.46    0.58
  -3   7  -5    2.76    0.60
   3  -7   5    2.80    0.54
   3  -7   5    3.46    0.54
   3  -7   5    4.10    0.63
  -2   8  -8    6.31    0.78
  -2   8  -8    4.86    0.81
  -2   8  -8    5.72    0.84
   2  -8   8    3.78    0.66
   2  -8   8    5.28    0.80
   2  -8   8    6.11    0.88
  -1   9 -11    1.06    0.57
  -1   9 -11    1.26    0.64
  -1   9 -11    0.11    0.56
   1  -9  11    1.11    0.56
   1  -9  11    0.83    0.49
   1  -9  11    0.67    0.57
  -7   2   9    1.10    0.59
  -7   2   9    0.85    0.48
   7  -2  -9    1.63    0.55
   7  -2  -9   -0.01    0.49
  -6   3   6   47.98    3.28
  -6   3   6   46.96    3.37
   6  -3  -6   48.73    3.31
   6  -3  -6   44.06    3.36
  -5   4   3    4.57    0.50
  -5   4   3    5.35    0.65
  -5   4   3    4.93    0.70
   5  -4  -3    4.78    0.65
   5  -4  -3    5.39    0.63
  -4   5   0   63.01    4.05
  -4   5   0   54.39    4.02
   4  -5   0   64.02    3.98
   4  -5   0   56.38    4.02
  -3   6  -3    0.84    0.37
  -3   6  -3    2.02    0.41
  -3   6  -3    2.77    0.49
  -3   6  -3    1.39    0.40
   3  -6   3    1.83    0.42
   3  -6   3    2.06    0.40
   3  -6   3    1.98    0.39
  -2   7  -6    0.47    0.42
  -2   7  -6    1.02    0.39
  -2   7  -6    0.12    0.37
   2  -7   6    0.45    0.36
   2  -7   6    0.64    0.41
   2  -7   6    0.99    0.42
  -1   8  -9   11.74    1.21
  -1   8  -9   12.27    1.26
  -1   8  -9   13.33    1.22
   1  -8   9    8.70    1.22
   1  -8   9   12.69    1.18
   1  -8   9   12.01    1.15
   0   9 -12    0.29    0.56
   0   9 -12   -0.14    0.53
   0  -9  12    1.03    0.70
   0  -9  12    0.18    0.57
  -7   1  11    0.51    0.59
   7  -1 -11    1.44    0.60
  -6   2   8   14.64    1.43
  -6   2   8   15.33    1.31
   6  -2  -8   14.81    1.37
   6  -2  -8   16.17    1.44
  -5   3   5   -0.13    0.33
  -5   3   5    0.29    0.38
   5  -3  -5   -0.17    0.31
   5  -3  -5   -0.36    0.31
  -4   4   2   28.91    1.97
  -4   4   2   24.96    1.95
   4  -4  -2   27.53    1.96
   4  -4  -2   26.30    1.91
  -3   5  -1    0.52    0.29
  -3   5  -1    0.94    0.37
   3  -5   1    0.55    0.29
   3  -5   1    0.78    0.29
  -2   6  -4   -0.03    0.28
  -2   6  -4   -0.38    0.31
  -2   6  -4   -0.10    0.27
   2  -6   4    0.10    0.27
   2  -6   4   -0.14    0.26
   2  -6   4   -0.09    0.27
  -1   7  -7    0.25    0.41
  -1   7  -7    0.33    0.43
  -1   7  -7    0.30    0.40
   1  -7   7    0.24    0.37
   1  -7   7   -0.41    0.34
   1  -7   7    0.82    0.47
   0   8 -10    3.20    0.68
   0   8 -10    3.11    0.64
   0   8 -10    1.17    0.59
   0  -8  10    1.97    0.57
   0  -8  10    1.03    0.60
   0  -8  10    1.59    0.51
  -6   1  10   -0.46    0.39
  -6   1  10    0.31    0.47
   6  -1 -10    0.26    0.52
   6  -1 -10   -0.07    0.42
  -5   2   7   24.46    2.28
  -5   2   7   36.33    2.25
   5  -2  -7   32.66    2.26
   5  -2  -7   29.69    2.33
  -4   3   4    9.96    0.91
  -4   3   4    9.39    0.87
   4  -3  -4    9.88    0.93
   4  -3  -4   10.05    0.89
  -3   4   1   18.12    1.24
  -3   4   1   15.57    1.21
   3  -4  -1   13.57    1.20
   3  -4  -1   15.50    1.17
  -2   5  -2   35.71    2.45
  -2   5  -2   35.28    2.40
  -2   5  -2   33.66    2.43
   2  -5   2   37.49    2.39
   2  -5   2   31.09    2.42
   2  -5   2   36.51    2.41
  -1   6  -5    9.71    0.94
  -1   6  -5   11.21    0.97
  -1   6  -5   10.46    1.02
   1  -6   5   10.30    1.00
   1  -6   5   10.84    0.92
   1  -6   5   10.61    0.93
   0   7  -8   18.10    1.67
   0   7  -8   20.33    1.66
   0   7  -8   19.82    1.69
   0  -7   8   19.84    1.70
   0  -7   8   21.49    1.60
   0  -7   8   20.95    1.63
   1   8 -11   -0.07    0.54
   1   8 -11    0.15    0.53
  -1  -8  11    0.54    0.54
  -1  -8  11    0.87    0.52
  -1  -8  11    0.80    0.53
  -6   0  12    0.67    0.59
  -6   0  12    1.23    0.66
   6   0 -12    0.98    0.57
  -5   1   9    5.82    0.68
  -5   1   9    4.06    0.76
   5  -1  -9    5.35    0.82
   5  -1  -9    5.48    0.75
  -4   2   6    4.03    0.52
  -4   2   6    2.07    0.48
   4  -2  -6    3.32    0.52
   4  -2  -6    2.14    0.55
  -3   3   3    2.83    0.47
   3  -3  -3    2.58    0.46
  -2   4   0    2.80    0.38
  -2   4   0    3.09    0.45
  -2   4   0    2.37    0.39
   2  -4   0    3.43    0.40
   2  -4   0    3.36    0.43
  -1   5  -3    4.96    0.51
  -1   5  -3    4.49    0.56
  -1   5  -3    4.32    0.53
   1  -5   3    3.22    0.50
   1  -5   3    4.69    0.49
   1  -5   3    5.06    0.53
   0   6  -6    5.16    0.75
   0   6  -6    6.08    0.74
   0   6  -6    5.45    0.69
   0  -6   6    5.94    0.75
   0  -6   6    6.66    0.70
   0  -6   6    6.06    0.67
   1   7  -9    3.43    0.71
   1   7  -9    3.69    0.68
   1   7  -9    3.25    0.68
  -1  -7   9    3.76    0.66
  -1  -7   9    3.32    0.60
  -1  -7   9    4.63    0.76
   2   8 -12    0.16    0.59
   2   8 -12    0.41    0.60
  -2  -8  12   -0.15    0.48
  -2  -8  12   -1.02    0.43
  -2  -8  12    0.07    0.53
  -5   0  11    0.30    0.52
  -5   0  11    0.89    0.55
   5   0 -11    0.19    0.54
   5   0 -11    0.13    0.47
  -4   1   8    3.56    0.65
  -4   1   8    4.83    0.57
   4  -1  -8    3.99    0.62
   4  -1  -8    3.29    0.64
  -3   2   5    0.51    0.30
  -3   2   5    0.37    0.29
   3  -2  -5    0.36    0.28
   3  -2  -5    0.45    0.30
  -2   3   2    5.08    0.62
  -2   3   2    7.97    0.64
   2  -3  -2    5.89    0.63
   2  -3  -2    8.10    0.61
  -1   4  -1    5.79    0.56
  -1   4  -1    6.47    0.55
  -1   4  -1    5.22    0.59
   1  -4   1    5.25    0.52
   1  -4   1    6.46    0.58
   1  -4   1    5.71    0.56
   0   5  -4  104.29    6.88
   0   5  -4  102.90    6.94
   0   5  -4  106.88    6.90
   0  -5   4  101.84    6.87
   0  -5   4  101.54    6.85
   0  -5   4  112.62    6.93
   1   6  -7    2.31    0.59
   1   6  -7    2.45    0.53
   1   6  -7    4.65    0.66
  -1  -6   7    2.86    0.53
  -1  -6   7    4.76    0.69
  -1  -6   7    3.07    0.53
   2   7 -10    0.60    0.55
   2   7 -10    0.30    0.48
  -2  -7  10    0.15    0.48
  -2  -7  10    0.52    0.46
  -2  -7  10   -0.13    0.40
  -4   0  10    4.69    0.82
  -4   0  10    7.03    0.66
  -4   0  10    3.95    0.74
   4   0 -10    5.64    0.78
   4   0 -10    4.17    0.86
  -3   1   7   -0.14    0.30
  -3   1   7   -0.14    0.28
   3  -1  -7    0.23    0.36
   3  -1  -7   -0.26    0.28
  -2   2   4   49.10    2.97
   2  -2  -4   39.87    2.97
   2  -2  -4   41.54    2.91
  -1   3   1   42.62    2.89
  -1   3   1   43.73    2.90
   1  -3  -1   42.32    2.89
   1  -3  -1   44.97    2.86
   0   4  -2    6.77    0.67
   0   4  -2    6.20    0.59
   0   4  -2    6.98    0.59
   0  -4   2    7.34    0.57
   0  -4   2    7.22    0.60
   0  -4   2    5.03    0.62
   1   5  -5    1.47    0.36
   1   5  -5    1.02    0.40
   1   5  -5   -0.04    0.27
  -1  -5   5    0.91    0.29
  -1  -5   5    0.89    0.29
  -1  -5   5   -0.13    0.29
   2   6  -8    6.22    0.80
   2   6  -8    7.62    0.88
   2   6  -8    5.69    0.85
  -2  -6   8    6.71    0.90
  -2  -6   8    6.10    0.75
  -2  -6   8    5.44    0.73
   3   7 -11    2.93    0.75
   3   7 -11    3.28    0.74
  -3  -7  11    3.34    0.67
  -3  -7  11    2.47    0.59
  -3  -7  11    2.55    0.74
  -4  -1  12    1.40    0.60
  -4  -1  12    0.65    0.49
   4   1 -12   -0.37    0.45
   4   1 -12    0.75    0.61
   4   1 -12    0.17    0.46
  -3   0   9   -0.07    0.30
  -3   0   9    0.29    0.37
   3   0  -9    0.39    0.40
   3   0  -9    0.34    0.46
  -2   1   6   31.93    2.06
  -2   1   6   30.31    2.17
   2  -1  -6   28.39    2.20
   2  -1  -6   30.56    2.12
  -1   2   3   20.77    1.49
   1  -2  -3   22.83    1.47
   1  -2  -3   20.13    1.52
   0   3   0  155.77    9.87
   0   3   0  149.40    9.87
   0   3   0  153.69    9.91
   0  -3   0  150.06    9.89
   0  -3   0  156.43    9.85
   1   4  -3   97.43    6.32
   1   4  -3   98.05    6.39
   1   4  -3   95.03    6.32
  -1  -4   3   96.31    6.31
  -1  -4   3   93.61    6.29
  -1  -4   3  101.30    6.37
   2   5  -6   16.65    1.37
   2   5  -6   17.70    1.44
   2   5  -6   17.74    1.38
  -2  -5   6   17.77    1.33
  -2  -5   6   17.24    1.32
  -2  -5   6   16.74    1.43
   3   6  -9    2.92    0.68
   3   6  -9    3.46    0.68
  -3  -6   9    4.39    0.62
  -3  -6   9    2.32    0.66
  -3  -6   9    4.25    0.65
  -3  -1  11    0.60    0.47
  -3  -1  11    0.24    0.43
   3   1 -11   -0.66    0.47
   3   1 -11   -0.09    0.41
   3   1 -11    0.20    0.39
  -2   0   8    0.08    0.22
  -2   0   8    0.14    0.31
   2   0  -8    0.25    0.39
   2   0  -8   -0.29    0.28
  -1   1   5   52.99    3.46
   1  -1  -5   50.53    3.34
   1  -1  -5   54.01    3.50
   1  -1  -5   48.71    3.41
   0   2   2   62.14    4.10
   0  -2  -2   63.16    4.08
   0  -2  -2   64.79    4.13
   0  -2  -2   62.32    4.08
   1   3  -1   18.65    1.34
   1   3  -1   19.06    1.26
  -1  -3   1   18.48    1.21
  -1  -3   1   18.96    1.27
  -1  -3   1   17.61    1.28
  -1  -3   1   17.86    1.21
   2   4  -4    6.61    0.66
   2   4  -4    6.66    0.75
   2   4  -4    6.88    0.65
  -2  -4   4    6.55    0.70
  -2  -4   4    7.71    0.60
  -2  -4   4    6.49    0.61
   3   5  -7    0.22    0.41
   3   5  -7    0.59    0.40
   3   5  -7    1.06    0.39
  -3  -5   7   -0.09    0.38
  -3  -5   7    0.57    0.34
  -3  -5   7    0.34    0.31
   4   6 -10    0.00    0.52
   4   6 -10   -0.31    0.49
  -4  -6  10    0.07    0.37
  -4  -6  10    0.03    0.44
  -4  -6  10    0.17    0.50
  -3  -2  13    1.28    0.63
   3   2 -13    1.64    0.69
   3   2 -13    0.35    0.47
   3   2 -13    1.60    0.57
  -2  -1  10   10.70    1.06
  -2  -1  10   10.09    1.10
   2   1 -10   10.55    1.16
   2   1 -10   10.20    0.96
   2   1 -10    9.73    1.01
  -1   0   7    4.41    0.59
  -1   0   7    5.05    0.42
   1   0  -7    4.36    0.64
   1   0  -7    4.52    0.56
   0   1   4    1.71    0.27
   0  -1  -4    1.30    0.22
   0  -1  -4    1.34    0.29
   0  -1  -4    1.49    0.24
   1   2   1   90.71    6.22
  -1  -2  -1   97.40    6.19
  -1  -2  -1   99.67    6.19
   2   3  -2   14.31    1.20
   2   3  -2   15.53    1.11
  -2  -3   2   16.31    1.05
  -2  -3   2   15.98    1.09
  -2  -3   2   16.77    1.16
  -2  -3   2   15.62    1.05
   3   4  -5    0.29    0.37
   3   4  -5    1.05    0.31
   3   4  -5    0.80    0.31
  -3  -4   5    0.69    0.28
  -3  -4   5    0.67    0.34
  -3  -4   5    0.29    0.24
   4   5  -8    1.82    0.54
   4   5  -8    1.88    0.56
  -4  -5   8    2.10    0.47
  -4  -5   8    0.84    0.37
  -4  -5   8    1.18    0.50
   5   6 -11    1.47    0.65
   5   6 -11    0.28    0.57
  -5  -6  11    0.45    0.57
  -5  -6  11    0.67    0.51
  -5  -6  11    0.40    0.43
  -2  -2  12    0.25    0.48
   2   2 -12   -0.18    0.35
   2   2 -12    0.38    0.51
   2   2 -12    0.05    0.40
  -1  -1   9    0.31    0.36
  -1  -1   9    0.74    0.42
   1   1  -9    0.64    0.35
   1   1  -9    0.84    0.46
   1   1  -9    0.47    0.27
   0   0   6    7.22    0.61
   0   0  -6    5.84    0.54
   0   0  -6    5.99    0.67
   0   0  -6    5.82    0.57
   0   0  -6    5.81    0.49
  -1  -1  -3   80.24    5.05
  -1  -1  -3   77.74    5.04
  -1  -1  -3   74.49    5.05
   2   2   0   12.48    0.90
  -2  -2   0   11.09    0.79
  -2  -2   0   12.11    0.79
   3   3  -3   25.31    1.71
   3   3  -3   23.77    1.81
  -3  -3   3   25.43    1.63
  -3  -3   3   24.31    1.63
  -3  -3   3   24.76    1.67
  -3  -3   3   24.56    1.77
   4   4  -6   -0.12    0.32
   4   4  -6   -0.14    0.38
   4   4  -6   -0.01    0.33
  -4  -4   6    0.70    0.27
  -4  -4   6    0.28    0.27
  -4  -4   6    0.09    0.34
   5   5  -9    0.73    0.53
   5   5  -9   -0.25    0.47
  -5  -5   9   -0.31    0.32
  -5  -5   9   -0.41    0.34
  -5  -5   9    0.46    0.50
  -1  -2  11   11.16    1.20
  -1  -2  11   10.74    1.18
   1   2 -11   11.01    1.30
   1   2 -11   11.91    1.10
   1   2 -11   12.15    1.03
   0  -1   8   14.15    1.26
   0  -1   8   17.55    1.32
   0   1  -8   14.18    1.34
   0   1  -8   16.65    1.15
   0   1  -8   16.13    1.22
   1   0   5    3.49    0.45
   1   0   5    3.67    0.42
  -1   0  -5    3.47    0.35
  -1   0  -5    4.24    0.48
  -1   0  -5    3.81    0.44
   2   1   2   13.00    0.89
  -2  -1  -2   12.25    0.98
  -3  -2   1   17.93    1.26
  -3  -2   1   19.37    1.26
  -3  -2   1   17.85    1.34
   4   3  -4    6.76    0.69
   4   3  -4    7.74    0.84
  -4  -3   4    7.25    0.53
  -4  -3   4    6.76    0.58
  -4  -3   4    7.59    0.76
  -4  -3   4    5.73    0.71
  -4  -3   4    6.92    0.54
   5   4  -7   -0.15    0.38
   5   4  -7   -0.59    0.41
  -5  -4   7    0.12    0.29
  -5  -4   7   -0.10    0.39
  -5  -4   7    0.05    0.25
   6   5 -10    1.10    0.64
   6   5 -10    0.88    0.56
  -6  -5  10    0.78    0.40
  -6  -5  10    0.90    0.48
  -6  -5  10    1.15    0.61
  -1  -3  13    0.37    0.54
   1   3 -13   -0.28    0.50
   1   3 -13    0.54    0.45
   0  -2  10    3.71    0.67
   0  -2  10    5.57    0.70
   0   2 -10    3.29    0.48
   0   2 -10    4.30    0.76
   0   2 -10    3.35    0.55
   1  -1   7   19.26    1.43
   1  -1   7   18.74    1.39
  -1   1  -7   19.85    1.35
  -1   1  -7   17.65    1.47
  -1   1  -7   18.74    1.37
  -1   1  -7   18.36    1.28
   2   0   4  117.68    7.88
  -2   0  -4  128.89    7.88
  -2   0  -4  120.58    7.87
  -2   0  -4  118.71    7.90
   3   1   1   30.38    1.98
  -3  -1  -1   29.79    2.07
  -3  -1  -1   31.70    2.12
   4   2  -2   66.64    4.17
  -4  -2   2   65.32    4.21
  -4  -2   2   63.38    4.25
  -4  -2   2   63.75    4.12
  -4  -2   2   59.49    4.21
   5   3  -5   19.15    1.44
  -5  -3   5   18.77    1.34
  -5  -3   5   19.06    1.29
  -5  -3   5   18.56    1.29
  -5  -3   5   17.68    1.47
  -5  -3   5   18.81    1.51
   6   4  -8    3.40    0.74
   6   4  -8    3.22    0.66
  -6  -4   8    3.50    0.47
  -6  -4   8    1.91    0.63
  -6  -4   8    3.45    0.55
   0  -3  12    0.12    0.46
   0   3 -12   -0.27    0.43
   0   3 -12    0.09    0.37
   1  -2   9   18.95    1.47
   1  -2   9   19.31    1.52
  -1   2  -9   17.48    1.41
  -1   2  -9   18.89    1.35
  -1   2  -9   19.25    1.58
   2  -1   6    4.71    0.53
  -2   1  -6    3.51    0.48
  -2   1  -6    3.23    0.50
  -2   1  -6    3.98    0.35
   3   0   3  143.52    9.16
  -3   0  -3  142.49    9.17
  -3   0  -3  143.45    9.23
  -3   0  -3  149.43    9.13
  -3   0  -3  130.81    9.12
  -4  -1   0    1.60    0.19
  -4  -1   0    2.15    0.41
  -4  -1   0    1.80    0.20
  -4  -1   0    2.32    0.36
   5   2  -3   16.94    1.25
  -5  -2   3   18.05    1.33
  -5  -2   3   17.61    1.35
  -5  -2   3   16.70    1.17
   6   3  -6    1.99    0.51
  -6  -3   6    2.48    0.56
  -6  -3   6    3.53    0.45
  -6  -3   6    3.32    0.61
  -6  -3   6    2.73    0.33
   7   4  -9   -0.80    0.46
   7   4  -9   -0.58    0.45
  -7  -4   9   -0.23    0.47
  -7  -4   9    0.31    0.28
   0  -4  14   -0.54    0.54
   0   4 -14   -0.41    0.41
   1  -3  11    0.64    0.48
  -1   3 -11    0.74    0.48
  -1   3 -11    0.13    0.32
  -1   3 -11    0.19    0.35
   2  -2   8    0.40    0.33
   2  -2   8    0.05    0.25
  -2   2  -8    0.15    0.21
  -2   2  -8   -0.15    0.34
  -2   2  -8    0.00    0.28
  -2   2  -8    0.23    0.19
   3  -1   5   24.71    1.69
  -3   1  -5   23.64    1.61
  -3   1  -5   23.69    1.73
  -3   1  -5   23.80    1.69
   4   0   2    2.45    0.25
  -4   0  -2    1.90    0.40
  -4   0  -2    2.22    0.37
  -5  -1   1   16.24    1.32
  -5  -1   1   16.53    1.28
  -5  -1   1   15.65    1.19
  -5  -1   1   17.73    1.19
   6   2  -4    0.24    0.29
  -6  -2   4    0.44    0.36
  -6  -2   4   -0.26    0.36
  -6  -2   4    0.14    0.19
   7   3  -7    0.67    0.45
  -7  -3   7    1.29    0.52
  -7  -3   7    0.12    0.42
  -7  -3   7    0.19    0.18
   1  -4  13    5.94    0.90
  -1   4 -13    3.42    0.83
  -1   4 -13    4.69    0.69
   2  -3  10   -0.06    0.42
  -2   3 -10    0.43    0.39
  -2   3 -10   -0.11    0.28
  -2   3 -10   -0.34    0.22
   3  -2   7    9.05    0.85
  -3   2  -7    8.71    0.67
  -3   2  -7    8.61    0.84
  -3   2  -7    7.71    0.82
   4  -1   4    0.52    0.21
  -4   1  -4    1.20    0.25
  -4   1  -4    1.07    0.22
  -4   1  -4    0.85    0.22
  -4   1  -4    0.73    0.33
  -5   0  -1   36.86    2.75
  -5   0  -1   43.75    2.66
  -5   0  -1   37.76    2.81
  -5   0  -1   41.74    2.66
   6   1  -2    0.45    0.23
  -6  -1   2    0.41    0.39
  -6  -1   2    0.10    0.25
  -6  -1   2    0.10    0.35
   7   2  -5    0.10    0.33
  -7  -2   5    0.23    0.24
  -7  -2   5   -0.19    0.35
  -7  -2   5   -0.35    0.39
   8   3  -8    0.31    0.56
  -8  -3   8    0.03    0.46
  -8  -3   8    1.01    0.55
   2  -4  12   -0.12    0.42
  -2   4 -12    0.26    0.36
  -2   4 -12   -0.24    0.45
   3  -3   9   17.09    1.42
  -3   3  -9   16.97    1.24
  -3   3  -9   17.67    1.46
  -3   3  -9   17.65    1.24
  -3   3  -9   15.72    1.38
   4  -2   6    1.14    0.33
  -4   2  -6    1.30    0.25
  -4   2  -6    1.22    0.35
  -4   2  -6    1.70    0.45
   5  -1   3    0.82    0.21
  -5   1  -3    1.01    0.36
  -5   1  -3    0.88    0.20
  -5   1  -3    0.91    0.21
  -5   1  -3    1.55    0.31
  -6   0   0    5.04    0.68
  -6   0   0    5.39    0.50
  -6   0   0    7.09    0.71
  -6   0   0    4.81    0.53
   7   1  -3    6.28    0.67
  -7  -1   3    7.35    0.78
  -7  -1   3    7.05    0.86
  -7  -1   3    6.36    0.52
  -8  -2   6   16.10    1.44
  -8  -2   6   15.24    1.45
   3  -4  11   -0.12    0.44
  -3   4 -11   -0.11    0.41
  -3   4 -11   -0.07    0.28
   4  -3   8    7.14    0.81
  -4   3  -8    6.81    0.54
  -4   3  -8    7.34    0.66
  -4   3  -8    8.29    0.87
  -4   3  -8    7.27    0.85
   5  -2   5    7.02    0.66
  -5   2  -5    7.48    0.70
  -5   2  -5    7.94    0.86
  -5   2  -5    6.73    0.64
   6  -1   2    0.86    0.19
  -6   1  -2    0.57    0.34
  -6   1  -2    0.11    0.20
  -6   1  -2    0.33    0.35
  -6   1  -2    0.29    0.20
   7   0  -1    6.74    0.62
  -7   0   1    8.04    0.90
  -7   0   1    8.18    0.84
  -7   0   1    6.10    0.71
  -7   0   1    6.91    0.72
  -8  -1   4   -0.21    0.34
  -8  -1   4    0.46    0.42
  -9  -2   7    1.71    0.58
  -9  -2   7    1.59    0.59
   3  -5  13   -0.04    0.50
  -3   5 -13   -0.08    0.49
  -3   5 -13   -0.43    0.38
  -3   5 -13    0.71    0.36
   4  -4  10    6.52    0.83
  -4   4 -10    4.95    0.79
  -4   4 -10    4.92    0.73
   5  -3   7    0.37    0.31
  -5   3  -7    0.73    0.37
  -5   3  -7    0.84    0.45
  -5   3  -7    0.84    0.24
   6  -2   4    0.05    0.23
   6  -2   4    0.04    0.18
  -6   2  -4    0.19    0.24
  -6   2  -4    0.27    0.29
  -6   2  -4    0.03    0.22
  -6   2  -4    0.13    0.36
  -7   1  -1   15.45    1.20
  -7   1  -1   16.28    1.40
  -7   1  -1   15.83    1.20
  -7   1  -1   16.16    1.32
  -8   0   2    1.44    0.44
  -8   0   2    1.79    0.53
  -8   0   2    2.21    0.55
  -9  -1   5   -0.13    0.48
  -9  -1   5    0.66    0.45
   4  -5  12    0.79    0.53
  -4   5 -12    0.86    0.47
  -4   5 -12    0.38    0.49
   5  -4   9    7.69    0.89
  -5   4  -9    7.56    0.91
  -5   4  -9    6.91    0.72
  -5   4  -9    7.49    0.93
   6  -3   6    6.29    0.77
   6  -3   6    5.94    0.68
  -6   3  -6    5.99    0.82
  -6   3  -6    6.13    0.63
  -6   3  -6    5.94    0.71
   7  -2   3   13.53    0.97
  -7   2  -3   13.52    1.13
  -7   2  -3   11.94    1.04
  -7   2  -3   13.77    1.21
  -7   2  -3   11.91    1.17
  -8   1   0   15.78    1.29
  -8   1   0   16.26    1.35
  -8   1   0   12.64    1.17
  -9   0   3    1.44    0.56
  -9   0   3    0.80    0.41
  -9   0   3    1.88    0.57
 -10  -1   6    1.74    0.67
 -10  -1   6    1.35    0.60
   5  -5  11   -0.05    0.42
   5  -5  11    0.53    0.46
  -5   5 -11    0.39    0.47
  -5   5 -11   -0.19    0.41
   6  -4   8    2.33    0.52
  -6   4  -8    2.08    0.34
  -6   4  -8    2.51    0.59
  -6   4  -8    1.27    0.46
   7  -3   5    0.50    0.30
  -7   3  -5    0.28    0.42
  -7   3  -5    0.62    0.34
  -7   3  -5    0.16    0.32
  -8   2  -2    6.11    0.88
  -8   2  -2    9.25    0.80
  -8   2  -2    6.47    0.85
  -9   1   1    0.35    0.36
  -9   1   1    0.20    0.49
  -9   1   1   -0.03    0.41
 -10   0   4    0.80    0.48
 -10   0   4    0.70    0.60
   6  -5  10    1.96    0.56
  -6   5 -10    2.34    0.62
  -6   5 -10    2.21    0.60
   7  -4   7    0.57    0.35
  -7   4  -7    0.53    0.45
  -7   4  -7    0.49    0.33
  -7   4  -7    0.72    0.39
   8  -3   4   13.74    1.08
  -8   3  -4   14.13    1.34
  -8   3  -4   14.61    1.23
  -9   2  -1    4.30    0.66
  -9   2  -1    6.12    0.88
  -9   2  -1    5.44    0.78
 -10   1   2   10.47    1.17
 -10   1   2   10.52    1.20
 -10   1   2    9.28    1.11
   7  -5   9    0.42    0.40
  -7   5  -9    0.09    0.44
  -7   5  -9   -0.13    0.39
   8  -4   6    2.73    0.48
  -8   4  -6    2.95    0.54
  -8   4  -6    2.73    0.55
  -8   4  -6    3.56    0.70
  -9   3  -3    0.45    0.45
  -9   3  -3    0.12    0.43
  -9   3  -3    0.60    0.39
 -10   2   0    0.94    0.41
 -10   2   0    1.02    0.52
 -10   2   0    0.38    0.53
 -11   1   3    7.50    1.04
 -11   1   3    6.64    0.95
 -11   1   3    6.73    1.00
   7  -6  11    3.29    0.67
  -7   6 -11    3.24    0.74
  -7   6 -11    3.48    0.77
   8  -5   8    2.81    0.55
  -8   5  -8    3.91    0.69
  -8   5  -8    2.17    0.66
  -8   5  -8    3.10    0.64
   9  -4   5    0.03    0.28
  -9   4  -5   -0.09    0.44
  -9   4  -5    0.12    0.39
  -9   4  -5    0.03    0.35
  -9   4  -5    0.08    0.39
 -10   3  -2    0.48    0.48
 -10   3  -2   -0.11    0.34
 -10   3  -2    0.47    0.47
 -11   2   1    3.99    0.76
 -11   2   1    5.37    0.92
 -11   2   1    7.33    0.97
   8  -6  10   -0.23    0.39
  -8   6 -10   -0.45    0.43
  -8   6 -10    0.20    0.45
   9  -5   7    1.44    0.44
  -9   5  -7    0.73    0.52
  -9   5  -7    1.38    0.44
  -9   5  -7    0.25    0.43
 -10   4  -4    0.40    0.41
 -10   4  -4    1.09    0.48
 -10   4  -4    0.83    0.51
 -11   3  -1    0.09    0.52
 -11   3  -1    0.57    0.59
 -11   3  -1   -0.24    0.40
 -10   5  -6    0.13    0.45
 -10   5  -6    0.82    0.54
 -10   5  -6    0.89    0.50
 -10   5  -6    1.08    0.49
 -11   4  -3    0.28    0.51
 -11   4  -3    0.37    0.51
 -11   4  -3    0.46    0.41
 -10   9  -1   -0.58    0.52
 -10   9  -1    0.58    0.56
 -10   9  -1    0.81    0.60
  10  -9   1   -0.16    0.47
  -9  10  -4   -0.04    0.55
  -9  10  -4    0.67    0.71
  -9  10  -4    0.40    0.54
  -9  10  -4    0.26    0.50
   9 -10   4    0.72    0.56
 -10   8   1    0.77    0.58
 -10   8   1    0.82    0.62
 -10   8   1    0.63    0.53
  10  -8  -1    0.41    0.56
  -9   9  -2    0.19    0.51
  -9   9  -2   -0.11    0.53
  -9   9  -2    0.24    0.52
   9  -9   2    0.47    0.50
  -8  10  -5    1.41    0.60
  -8  10  -5    3.00    0.81
   8 -10   5    1.79    0.61
 -10   7   3    1.51    0.64
 -10   7   3    1.57    0.67
  10  -7  -3    1.66    0.62
  -9   8   0    0.56    0.51
  -9   8   0    0.74    0.52
  -9   8   0    0.25    0.53
   9  -8   0    1.10    0.52
  -8   9  -3    1.27    0.64
  -8   9  -3    1.02    0.56
   8  -9   3    1.46    0.55
  -7  10  -6    0.11    0.54
  -7  10  -6    0.13    0.58
   7 -10   6    1.15    0.51
   7 -10   6    0.12    0.48
 -10   6   5   -0.15    0.50
 -10   6   5    0.33    0.52
  10  -6  -5   -0.29    0.51
  -9   7   2   18.35    1.48
  -9   7   2   17.96    1.60
  -9   7   2   14.79    1.59
   9  -7  -2   16.82    1.56
  -8   8  -1    3.18    0.68
  -8   8  -1    1.74    0.62
  -8   8  -1    3.41    0.65
  -8   8  -1    2.66    0.75
   8  -8   1    2.85    0.64
   8  -8   1    2.30    0.87
  -7   9  -4    4.99    0.84
  -7   9  -4    8.36    1.08
   7  -9   4    6.22    0.84
   7  -9   4    5.04    0.83
  -6  10  -7    0.77    0.53
  -6  10  -7    0.83    0.61
   6 -10   7    0.89    0.52
   6 -10   7    1.08    0.54
  -9   6   4   -0.02    0.46
  -9   6   4    0.44    0.53
   9  -6  -4    0.15    0.48
  -8   7   1    4.88    0.83
  -8   7   1    5.72    0.74
  -8   7   1    3.54    0.72
   8  -7  -1    5.03    0.76
   8  -7  -1    6.22    0.86
  -7   8  -2    0.23    0.43
  -7   8  -2   -0.58    0.40
   7  -8   2    0.41    0.40
   7  -8   2    0.58    0.44
  -6   9  -5    0.16    0.46
  -6   9  -5   -1.02    0.44
   6  -9   5    0.14    0.40
   6  -9   5   -0.35    0.41
   6  -9   5    0.48    0.42
  -5  10  -8    4.33    0.90
  -5  10  -8    6.70    1.01
  -5  10  -8    5.91    0.83
   5 -10   8    2.57    0.74
   5 -10   8    6.21    0.89
   5 -10   8    6.62    0.85
  -9   5   6    0.39    0.50
  -9   5   6    0.75    0.55
   9  -5  -6    0.63    0.51
  -8   6   3    3.06    0.52
  -8   6   3    3.72    0.72
  -8   6   3    3.06    0.71
   8  -6  -3    3.79    0.67
   8  -6  -3    2.72    0.63
  -7   7   0   -0.01    0.50
  -7   7   0    0.33    0.42
  -7   7   0   -0.26    0.37
   7  -7   0   -0.08    0.38
   7  -7   0    0.31    0.38
  -6   8  -3    3.40    0.66
  -6   8  -3    5.21    0.80
   6  -8   3    4.58    0.69
   6  -8   3    3.98    0.69
  -5   9  -6   -0.99    0.46
  -5   9  -6    0.06    0.45
  -5   9  -6    0.07    0.45
  -5   9  -6   -0.15    0.39
   5  -9   6    0.15    0.44
   5  -9   6    0.01    0.43
   5  -9   6   -0.46    0.37
  -4  10  -9    0.18    0.53
  -4  10  -9   -0.40    0.45
  -4  10  -9   -0.60    0.47
   4 -10   9   -0.30    0.44
   4 -10   9    0.84    0.53
   4 -10   9   -0.27    0.46
  -9   4   8    0.99    0.62
  -9   4   8    0.33    0.56
   9  -4  -8    0.74    0.57
  -8   5   5    0.72    0.50
  -8   5   5    0.83    0.49
   8  -5  -5    1.40    0.54
   8  -5  -5    1.06    0.51
  -7   6   2    9.39    1.07
  -7   6   2    9.62    1.09
  -7   6   2   10.69    0.98
   7  -6  -2   12.27    1.14
   7  -6  -2   10.33    1.07
  -6   7  -1    0.21    0.48
  -6   7  -1    0.00    0.38
   6  -7   1    0.06    0.38
   6  -7   1    0.51    0.41
  -5   8  -4   14.65    1.37
  -5   8  -4   14.22    1.44
   5  -8   4   15.25    1.32
   5  -8   4   14.35    1.27
   5  -8   4   14.26    1.29
  -4   9  -7    8.88    1.11
  -4   9  -7    9.98    1.05
  -4   9  -7    7.73    1.04
   4  -9   7    8.11    1.07
   4  -9   7    9.82    1.07
   4  -9   7    8.35    0.95
  -3  10 -10   -0.81    0.44
  -3  10 -10    0.44    0.54
  -3  10 -10    0.34    0.54
   3 -10  10    0.12    0.48
   3 -10  10    1.23    0.55
   3 -10  10   -0.18    0.46
  -8   4   7    2.63    0.66
  -8   4   7    2.81    0.71
   8  -4  -7    2.67    0.66
  -7   5   4    0.57    0.29
  -7   5   4   -0.16    0.38
  -7   5   4    0.55    0.49
   7  -5  -4    1.07    0.48
   7  -5  -4    0.00    0.39
  -6   6   1   -0.29    0.36
  -6   6   1   -0.39    0.42
  -6   6   1   -0.28    0.30
   6  -6  -1   -0.12    0.37
   6  -6  -1   -0.12    0.36
  -5   7  -2    1.32    0.47
  -5   7  -2    3.23    0.62
   5  -7   2    1.03    0.43
   5  -7   2    1.96    0.46
  -4   8  -5    0.35    0.41
  -4   8  -5    0.01    0.40
  -4   8  -5    0.09    0.41
  -4   8  -5    0.22    0.49
   4  -8   5   -0.60    0.33
   4  -8   5    0.21    0.38
   4  -8   5    0.06    0.40
  -3   9  -8    0.16    0.48
  -3   9  -8   -0.10    0.45
  -3   9  -8    0.42    0.49
   3  -9   8   -0.16    0.42
   3  -9   8    0.18    0.43
   3  -9   8    0.60    0.44
  -2  10 -11    1.48    0.68
  -2  10 -11    1.85    0.68
  -2  10 -11    2.45    0.68
   2 -10  11    2.72    0.80
   2 -10  11    2.18    0.61
   2 -10  11    1.14    0.64
  -8   3   9    0.43    0.55
  -8   3   9    0.99    0.52
   8  -3  -9   -0.09    0.51
  -7   4   6    0.10    0.40
  -7   4   6   -0.04    0.47
   7  -4  -6    0.38    0.45
   7  -4  -6    0.25    0.45
  -6   5   3   90.20    6.39
  -6   5   3   97.83    6.34
  -6   5   3  100.59    6.21
   6  -5  -3   87.82    6.38
   6  -5  -3   97.04    6.32
  -5   6   0   15.38    1.36
  -5   6   0   16.89    1.40
   5  -6   0   16.90    1.36
   5  -6   0   15.61    1.30
  -4   7  -3    2.74    0.50
  -4   7  -3    2.16    0.55
  -4   7  -3    1.69    0.50
   4  -7   3    3.17    0.54
   4  -7   3    2.28    0.46
   4  -7   3    1.89    0.47
  -3   8  -6    1.45    0.52
  -3   8  -6    1.66    0.53
  -3   8  -6    2.14    0.50
   3  -8   6    1.32    0.46
   3  -8   6    1.00    0.42
   3  -8   6    1.07    0.49
  -2   9  -9    0.77    0.47
  -2   9  -9    0.21    0.47
  -2   9  -9    0.59    0.52
   2  -9   9    0.07    0.47
   2  -9   9    0.22    0.43
   2  -9   9   -0.04    0.45
  -7   3   8    2.66    0.60
  -7   3   8    0.32    0.47
   7  -3  -8    1.35    0.55
   7  -3  -8    1.19    0.53
  -6   4   5   15.24    1.40
  -6   4   5   17.25    1.45
   6  -4  -5   13.99    1.40
   6  -4  -5   19.96    1.49
  -5   5   2    5.86    0.58
  -5   5   2    3.84    0.61
   5  -5  -2    4.57    0.67
   5  -5  -2    4.71    0.62
  -4   6  -1    0.38    0.32
  -4   6  -1    0.53    0.38
   4  -6   1    0.24    0.30
   4  -6   1    0.21    0.31
  -3   7  -4    4.58    0.72
  -3   7  -4    5.65    0.70
  -3   7  -4    6.21    0.79
   3  -7   4    4.97    0.73
   3  -7   4    6.58    0.73
   3  -7   4    6.00    0.67
  -2   8  -7    0.15    0.39
  -2   8  -7    0.05    0.38
  -2   8  -7   -0.43    0.43
   2  -8   7    0.03    0.36
   2  -8   7   -0.18    0.37
   2  -8   7   -0.09    0.39
  -1   9 -10   -0.07    0.45
  -1   9 -10   -0.51    0.45
  -1   9 -10   -0.19    0.54
   1  -9  10   -0.25    0.45
   1  -9  10    0.01    0.44
   1  -9  10   -0.68    0.46
  -7   2  10    3.25    0.74
  -7   2  10    2.48    0.58
   7  -2 -10    1.63    0.61
   7  -2 -10    1.74    0.67
  -6   3   7   10.02    0.97
  -6   3   7    6.33    0.92
   6  -3  -7    7.26    1.00
   6  -3  -7    8.73    0.94
  -5   4   4   16.26    1.22
  -5   4   4   14.02    1.25
   5  -4  -4   11.81    1.21
   5  -4  -4   15.09    1.19
  -4   5   1   -0.11    0.32
  -4   5   1    0.38    0.30
   4  -5  -1    0.12    0.28
   4  -5  -1    0.23    0.28
  -3   6  -2   24.20    1.79
  -3   6  -2   22.89    1.74
  -3   6  -2   24.02    1.81
   3  -6   2   24.27    1.73
   3  -6   2   23.92    1.79
   3  -6   2   23.84    1.75
  -2   7  -5    3.02    0.56
  -2   7  -5    3.42    0.54
  -2   7  -5    2.79    0.60
   2  -7   5    2.62    0.55
   2  -7   5    2.84    0.49
   2  -7   5    2.96    0.52
  -1   8  -8    1.69    0.56
  -1   8  -8    1.45    0.53
  -1   8  -8    0.85    0.50
   1  -8   8    0.60    0.46
   1  -8   8    2.15    0.58
   1  -8   8    0.75    0.44
   0   9 -11    3.83    0.83
   0   9 -11    2.33    0.76
   0  -9  11    5.09    0.98
   0  -9  11    3.55    0.72
   0  -9  11    4.20    0.73
  -6   2   9    0.86    0.46
  -6   2   9    1.62    0.57
   6  -2  -9    0.47    0.50
   6  -2  -9    0.81    0.54
  -5   3   6   41.19    2.97
  -5   3   6   43.40    2.91
   5  -3  -6   41.53    2.92
   5  -3  -6   39.30    3.00
  -4   4   3    0.39    0.29
  -4   4   3   -0.09    0.17
   4  -4  -3    0.14    0.30
   4  -4  -3    0.12    0.27
  -3   5   0   14.87    1.10
  -3   5   0   11.53    1.10
   3  -5   0   16.33    1.11
   3  -5   0   10.37    1.01
  -2   6  -3    1.72    0.39
  -2   6  -3    0.81    0.39
  -2   6  -3    1.20    0.36
  -2   6  -3    1.65    0.39
   2  -6   3    1.88    0.35
   2  -6   3    1.72    0.40
   2  -6   3    1.77    0.42
  -1   7  -6   17.07    1.50
  -1   7  -6   17.86    1.46
  -1   7  -6   18.62    1.46
   1  -7   6   17.71    1.53
   1  -7   6   17.16    1.42
   1  -7   6   19.03    1.42
   0   8  -9    2.66    0.66
   0   8  -9    2.53    0.63
   0   8  -9    2.12    0.64
   0  -8   9    2.66    0.59
   0  -8   9    1.16    0.61
   0  -8   9    1.98    0.52
  -6   1  11    0.22    0.50
   6  -1 -11    0.11    0.46
   6  -1 -11    0.14    0.52
  -5   2   8    5.15    0.65
  -5   2   8    3.75    0.67
   5  -2  -8    2.93    0.66
   5  -2  -8    2.83    0.58
  -4   3   5    2.99    0.49
  -4   3   5    2.39    0.49
   4  -3  -5    2.42    0.46
   4  -3  -5    2.12    0.47
  -3   4   2   13.05    1.08
  -3   4   2   12.74    1.08
   3  -4  -2   14.85    1.06
   3  -4  -2   12.75    1.08
  -2   5  -1    5.55    0.59
  -2   5  -1    5.49    0.62
  -2   5  -1    5.26    0.56
   2  -5   1    3.48    0.54
   2  -5   1    5.42    0.55
  -1   6  -4   16.71    1.26
  -1   6  -4   17.33    1.34
  -1   6  -4   15.16    1.27
   1  -6   4   16.24    1.23
   1  -6   4   16.93    1.26
   1  -6   4   15.03    1.30
   0   7  -7   74.86    5.20
   0   7  -7   75.17    5.16
   0   7  -7   78.66    5.14
   0  -7   7   73.84    5.21
   0  -7   7   74.85    5.10
   0  -7   7   77.46    5.08
   1   8 -10    4.11    0.76
   1   8 -10    3.50    0.79
  -1  -8  10    2.49    0.68
  -1  -8  10    2.83    0.64
  -1  -8  10    4.09    0.65
  -5   1  10    5.33    0.92
  -5   1  10    7.95    0.78
   5  -1 -10    4.87    0.89
   5  -1 -10    5.77    0.82
  -4   2   7   -0.10    0.34
  -4   2   7   -0.25    0.31
   4  -2  -7    0.66    0.41
   4  -2  -7    0.23    0.35
  -3   3   4   -0.22    0.24
   3  -3  -4   -0.42    0.26
   3  -3  -4   -0.41    0.23
  -2   4   1  110.25    6.92
  -2   4   1  103.72    6.93
   2  -4  -1  104.70    6.94
   2  -4  -1  104.33    6.88
  -1   5  -2    5.62    0.57
  -1   5  -2    3.14    0.51
  -1   5  -2    3.32    0.45
   1  -5   2    4.86    0.54
   1  -5   2    3.50    0.43
   1  -5   2    4.10    0.49
   0   6  -5    0.45    0.40
   0   6  -5    0.15    0.28
   0   6  -5   -0.20    0.29
   0  -6   5    0.44    0.33
   0  -6   5    0.01    0.26
   0  -6   5    0.39    0.31
   1   7  -8   13.00    1.29
   1   7  -8   14.01    1.26
   1   7  -8   14.53    1.27
  -1  -7   8   11.62    1.14
  -1  -7   8   13.49    1.30
  -1  -7   8   12.00    1.17
   2   8 -11   -0.29    0.53
   2   8 -11    0.85    0.56
  -2  -8  11   -0.44    0.41
  -2  -8  11   -0.60    0.43
  -2  -8  11   -0.69    0.46
  -5   0  12    0.81    0.59
  -5   0  12    0.00    0.49
   5   0 -12    0.40    0.50
   5   0 -12    1.13    0.65
  -4   1   9    0.53    0.41
  -4   1   9    0.98    0.37
   4  -1  -9   -0.06    0.39
   4  -1  -9    0.63    0.47
  -3   2   6    0.80    0.35
  -3   2   6    0.63    0.35
   3  -2  -6    1.23    0.45
   3  -2  -6    1.42    0.36
  -2   3   3    7.04    0.65
  -2   3   3    6.66    0.64
   2  -3  -3    7.68    0.70
   2  -3  -3    6.77    0.64
  -1   4   0   10.80    0.90
  -1   4   0    9.39    0.84
  -1   4   0   11.87    0.86
   1  -4   0   11.25    0.88
   1  -4   0   10.52    0.81
   0   5  -3    9.46    0.84
   0   5  -3   11.09    0.93
   0   5  -3   10.01    0.83
   0  -5   3   10.51    0.84
   0  -5   3    8.68    0.87
   0  -5   3   10.44    0.80
   1   6  -6    0.81    0.36
   1   6  -6   -0.06    0.29
   1   6  -6    0.28    0.38
  -1  -6   6   -0.24    0.29
  -1  -6   6    0.32    0.29
  -1  -6   6   -0.07    0.32
   2   7  -9    1.89    0.62
   2   7  -9    4.18    0.70
  -2  -7   9    2.10    0.64
  -2  -7   9    3.54    0.59
  -2  -7   9    3.10    0.60
  -4   0  11    1.04    0.55
  -4   0  11   -0.08    0.49
   4   0 -11    0.20    0.50
   4   0 -11    0.08    0.44
  -3   1   8    2.44    0.42
  -3   1   8    2.16    0.49
   3  -1  -8    2.10    0.56
   3  -1  -8    1.75    0.45
  -2   2   5    5.53    0.62
   2  -2  -5    5.41    0.57
   2  -2  -5    6.15    0.68
  -1   3   2   48.68    2.94
  -1   3   2   40.45    2.92
   1  -3  -2   39.28    2.89
   1  -3  -2   47.71    2.96
   0   4  -1    1.03    0.32
   0   4  -1    1.61    0.27
   0   4  -1    1.21    0.26
   0  -4   1    1.22    0.29
   0  -4   1    1.97    0.31
   0  -4   1    1.22    0.23
   1   5  -4   20.92    1.54
   1   5  -4   19.69    1.54
   1   5  -4   22.30    1.64
  -1  -5   4   21.06    1.50
  -1  -5   4   20.91    1.52
  -1  -5   4   23.20    1.61
   2   6  -7    2.95    0.63
   2   6  -7    3.54    0.60
   2   6  -7    3.37    0.60
  -2  -6   7    3.51    0.52
  -2  -6   7    2.18    0.59
  -2  -6   7    3.11    0.52
   3   7 -10    3.92    0.73
   3   7 -10    4.51    0.82
  -3  -7  10    1.36    0.65
  -3  -7  10    2.54    0.60
  -3  -7  10    3.30    0.59
  -4  -1  13    3.22    0.75
   4   1 -13    3.00    0.86
   4   1 -13    3.45    0.72
  -3   0  10    2.67    0.61
  -3   0  10    1.72    0.56
   3   0 -10    2.38    0.66
   3   0 -10    3.64    0.61
  -2   1   7    0.03    0.29
  -2   1   7    0.76    0.27
   2  -1  -7    0.61    0.40
   2  -1  -7    0.68    0.31
  -1   2   4    4.71    0.52
   1  -2  -4    5.70    0.50
   1  -2  -4    4.72    0.56
   0   3   1    0.03    0.19
   0   3   1    0.37    0.18
   0  -3  -1   -0.14    0.17
   0  -3  -1    0.12    0.12
   0  -3  -1    0.01    0.12
   1   4  -2   18.56    1.27
   1   4  -2   16.74    1.26
   1   4  -2   18.15    1.35
  -1  -4   2   17.52    1.30
  -1  -4   2   17.87    1.22
  -1  -4   2   18.27    1.26
   2   5  -5    2.97    0.47
   2   5  -5    4.07    0.51
   2   5  -5    3.63    0.59
  -2  -5   5    1.50    0.46
  -2  -5   5    3.66    0.43
  -2  -5   5    3.45    0.46
   3   6  -8    1.68    0.54
   3   6  -8    2.29    0.59
  -3  -6   8    1.96    0.58
  -3  -6   8    1.46    0.45
  -3  -6   8    1.02    0.38
   4   7 -11    0.14    0.55
   4   7 -11   -0.36    0.55
  -4  -7  11    0.04    0.52
  -4  -7  11    0.02    0.40
  -4  -7  11    0.07    0.46
  -3  -1  12   10.08    1.21
   3   1 -12    9.09    1.28
   3   1 -12   12.48    1.13
   3   1 -12   11.42    1.16
  -2   0   9    3.32    0.37
  -2   0   9    2.35    0.52
   2   0  -9    2.16    0.49
   2   0  -9    2.16    0.59
  -1   1   6    1.28    0.31
   1  -1  -6    1.20    0.39
   1  -1  -6    1.63    0.32
   1  -1  -6    1.12    0.19
   0   2   3   10.05    0.88
   0   2   3   10.15    0.73
   0  -2  -3   10.48    0.75
   0  -2  -3   10.51    0.72
   0  -2  -3   10.26    0.80
   0  -2  -3    9.70    0.72
   1   3   0    0.76    0.18
   1   3   0    0.90    0.26
  -1  -3   0    1.18    0.20
  -1  -3   0    0.96    0.20
   2   4  -3    2.83    0.44
   2   4  -3    2.06    0.33
   2   4  -3    1.80    0.33
  -2  -4   3    1.90    0.37
  -2  -4   3    2.71    0.32
  -2  -4   3    2.35    0.27
   3   5  -6    0.43    0.41
   3   5  -6    0.35    0.33
   3   5  -6    0.57    0.35
  -3  -5   6    0.22    0.27
  -3  -5   6    0.25    0.29
  -3  -5   6    0.22    0.36
   4   6  -9    1.10    0.55
   4   6  -9   -0.02    0.47
  -4  -6   9    0.28    0.36
  -4  -6   9    0.01    0.39
  -4  -6   9    0.73    0.50
  -2  -1  11    2.06    0.57
  -2  -1  11    2.33    0.58
   2   1 -11    2.03    0.52
   2   1 -11    2.40    0.48
   2   1 -11    1.63    0.65
  -1   0   8    0.20    0.16
  -1   0   8   -0.13    0.25
   1   0  -8    0.41    0.37
   1   0  -8    0.19    0.30
   1   0  -8   -0.09    0.22
   1   0  -8    0.02    0.19
   0   1   5    6.64    0.58
   0  -1  -5    5.33    0.62
   0  -1  -5    5.82    0.51
   0  -1  -5    7.09    0.55
   1   2   2   14.51    1.03
  -1  -2  -2   15.17    1.02
  -1  -2  -2   14.80    1.07
  -1  -2  -2   14.37    1.02
   2   3  -1    0.46    0.15
   2   3  -1    0.37    0.26
  -2  -3   1    0.99    0.21
  -2  -3   1    0.72    0.19
   3   4  -4   12.86    1.01
   3   4  -4   12.90    1.12
  -3  -4   4   12.57    0.95
  -3  -4   4   11.08    1.05
  -3  -4   4   13.29    0.92
  -3  -4   4   13.11    0.91
   4   5  -7    4.57    0.67
   4   5  -7    4.16    0.71
  -4  -5   7    4.96    0.62
  -4  -5   7    5.58    0.79
  -4  -5   7    4.26    0.53
   5   6 -10    5.94    0.96
   5   6 -10    8.08    1.02
  -5  -6  10    4.53    0.91
  -5  -6  10    5.10    0.77
  -5  -6  10    6.09    0.72
  -2  -2  13    0.06    0.55
   2   2 -13   -0.10    0.43
   2   2 -13    0.70    0.54
  -1  -1  10    4.01    0.69
  -1  -1  10    4.62    0.72
   1   1 -10    5.21    0.57
   1   1 -10    3.57    0.73
   1   1 -10    5.49    0.66
   0   0   7    0.15    0.24
   0   0  -7    0.25    0.17
   0   0  -7    0.21    0.21
   0   0  -7   -0.07    0.30
   0   0  -7   -0.25    0.22
  -1  -1  -4    2.75    0.37
  -1  -1  -4    3.18    0.37
   2   2   1   12.99    0.95
  -2  -2  -1   12.63    0.99
   3   3  -2   -0.09    0.16
   3   3  -2   -0.14    0.25
  -3  -3   2    0.15    0.19
  -3  -3   2   -0.01    0.13
   4   4  -5    0.47    0.42
   4   4  -5    1.05    0.35
  -4  -4   5    0.66    0.23
  -4  -4   5    1.16    0.40
  -4  -4   5    0.96    0.27
  -4  -4   5    0.99    0.23
   5   5  -8    0.10    0.45
   5   5  -8    0.59    0.49
  -5  -5   8    0.00    0.44
  -5  -5   8   -0.32    0.35
  -5  -5   8    0.20    0.29
  -1  -2  12   -0.21    0.48
   1   2 -12    0.38    0.49
   1   2 -12    0.48    0.41
   0  -1   9   -0.03    0.31
   0  -1   9    0.56    0.40
   0   1  -9    0.56    0.25
   0   1  -9    0.00    0.40
   0   1  -9    0.44    0.33
   1   0   6    8.21    0.77
   1   0   6    7.78    0.69
  -1   0  -6    9.07    0.79
  -1   0  -6    8.16    0.64
  -1   0  -6    8.74    0.72
   2   1   3    4.86    0.40
  -2  -1  -3    4.96    0.53
  -2  -1  -3    5.62    0.42
  -2  -1  -3    5.40    0.42
  -3  -2   0   38.53    2.67
  -3  -2   0   39.66    2.65
   4   3  -3   -0.13    0.29
   4   3  -3    0.25    0.20
  -4  -3   3    0.77    0.34
  -4  -3   3    0.29    0.26
  -4  -3   3    0.05    0.14
   5   4  -6   10.59    1.01
   5   4  -6   10.41    1.09
  -5  -4   6   10.43    0.88
  -5  -4   6   10.60    0.80
  -5  -4   6   10.18    1.04
   6   5  -9    2.16    0.67
   6   5  -9    1.53    0.62
  -6  -5   9    1.57    0.48
  -6  -5   9    1.12    0.60
  -6  -5   9    2.04    0.39
   0  -2  11    0.73    0.50
   0   2 -11    0.62    0.38
   0   2 -11    0.72    0.49
   0   2 -11    1.38    0.46
   1  -1   8   -0.32    0.29
   1  -1   8   -0.01    0.22
  -1   1  -8    0.01    0.26
  -1   1  -8   -0.44    0.20
  -1   1  -8    0.18    0.36
  -1   1  -8   -0.31    0.16
   2   0   5    0.45    0.24
  -2   0  -5    0.17    0.24
  -2   0  -5    0.27    0.23
   3   1   2   61.53    4.05
  -3  -1  -2   63.03    4.15
  -3  -1  -2   62.49    4.11
  -4  -2   1    0.85    0.31
  -4  -2   1    1.77    0.25
  -4  -2   1    1.40    0.39
  -4  -2   1    1.97    0.26
   5   3  -4    3.62    0.45
  -5  -3   4    4.07    0.57
  -5  -3   4    2.32    0.32
  -5  -3   4    1.92    0.46
   6   4  -7    3.40    0.61
   6   4  -7    3.13    0.73
  -6  -4   7    2.58    0.64
  -6  -4   7    3.83    0.39
  -6  -4   7    4.07    0.71
  -6  -4   7    4.11    0.53
   0  -3  13    0.07    0.49
   0   3 -13   -0.34    0.39
   0   3 -13    0.63    0.55
   1  -2  10    4.26    0.69
  -1   2 -10    4.35    0.47
  -1   2 -10    3.62    0.52
  -1   2 -10    3.80    0.73
   2  -1   7    1.08    0.37
  -2   1  -7    1.83    0.23
  -2   1  -7    1.35    0.40
  -2   1  -7    2.02    0.41
   3   0   4   35.06    2.35
  -3   0  -4   36.87    2.33
  -3   0  -4   35.30    2.31
  -3   0  -4   33.69    2.33
  -3   0  -4   32.89    2.40
  -4  -1  -1   20.53    1.53
  -4  -1  -1   20.32    1.47
   5   2  -2    0.13    0.19
  -5  -2   2    0.32    0.31
  -5  -2   2    0.21    0.23
  -5  -2   2    0.18    0.22
   6   3  -5    0.25    0.32
  -6  -3   5    0.33    0.43
  -6  -3   5    0.26    0.35
  -6  -3   5   -0.32    0.19
   7   4  -8   -0.52    0.44
   7   4  -8    0.73    0.50
  -7  -4   8   -0.46    0.38
   1  -3  12    6.23    0.91
  -1   3 -12    6.40    0.96
  -1   3 -12    6.67    0.79
   2  -2   9   10.71    1.00
  -2   2  -9    9.63    0.77
  -2   2  -9   10.37    0.83
  -2   2  -9    9.82    1.07
  -2   2  -9   11.48    0.97
   3  -1   6    7.85    0.69
  -3   1  -6    7.00    0.71
  -3   1  -6    6.94    0.76
   4   0   3    8.05    0.60
  -4   0  -3    7.41    0.55
  -4   0  -3    8.43    0.67
  -4   0  -3    7.55    0.54
  -4   0  -3    7.64    0.75
  -5  -1   0    0.02    0.14
  -5  -1   0    0.18    0.27
  -5  -1   0   -0.06    0.31
  -5  -1   0    0.12    0.15
   6   2  -3    1.35    0.31
  -6  -2   3    0.46    0.33
  -6  -2   3    1.18    0.43
   7   3  -6    0.00    0.38
  -7  -3   6    0.52    0.42
  -7  -3   6    0.68    0.51
   2  -3  11   14.09    1.23
  -2   3 -11   10.80    1.07
  -2   3 -11   12.38    0.99
  -2   3 -11    8.98    1.19
   3  -2   8   -0.51    0.34
  -3   2  -8    0.34    0.34
  -3   2  -8    0.39    0.35
  -3   2  -8    0.03    0.17
   4  -1   5    0.14    0.22
  -4   1  -5    0.15    0.19
  -4   1  -5    0.08    0.21
  -4   1  -5    0.09    0.17
  -4   1  -5   -0.32    0.29
   5   0   2    0.51    0.13
  -5   0  -2    0.26    0.12
  -5   0  -2    0.17    0.12
  -5   0  -2    0.33    0.31
  -5   0  -2   -0.30    0.23
  -6  -1   1    0.32    0.23
  -6  -1   1    0.09    0.23
  -6  -1   1    0.53    0.36
  -6  -1   1    0.68    0.42
  -7  -2   4    1.92    0.47
  -7  -2   4    1.31    0.52
  -8  -3   7    0.22    0.45
  -8  -3   7    0.79    0.52
   2  -4  13    1.92    0.64
  -2   4 -13    1.74    0.67
  -2   4 -13    1.37    0.50
  -2   4 -13    2.03    0.47
   3  -3  10    1.08    0.47
  -3   3 -10    1.30    0.27
  -3   3 -10    1.32    0.44
  -3   3 -10    1.07    0.47
   4  -2   7   12.65    1.07
  -4   2  -7   12.56    0.91
  -4   2  -7   13.14    1.10
  -4   2  -7   12.51    1.14
   5  -1   4   -0.02    0.18
  -5   1  -4    0.23    0.21
  -5   1  -4    0.41    0.26
  -5   1  -4   -0.17    0.33
  -5   1  -4    0.15    0.18
  -6   0  -1   -0.05    0.35
  -6   0  -1    0.58    0.34
  -6   0  -1    0.42    0.20
  -6   0  -1    0.34    0.18
  -7  -1   2   24.89    1.89
  -7  -1   2   25.32    1.93
  -7  -1   2   23.94    1.80
  -8  -2   5    0.51    0.45
  -8  -2   5    1.27    0.56
   3  -4  12   13.06    1.27
  -3   4 -12    9.99    1.29
  -3   4 -12   13.75    1.02
  -3   4 -12   11.41    1.20
  -4   3  -9    1.24    0.48
   5  -2   6    5.17    0.58
  -5   2  -6    4.66    0.60
  -5   2  -6    5.53    0.72
  -5   2  -6    4.41    0.51
   6  -1   3   13.64    0.93
  -6   1  -3   12.60    1.16
  -6   1  -3   12.22    0.96
  -6   1  -3   14.13    1.07
  -6   1  -3   11.75    0.93
  -7   0   0    1.47    0.31
  -7   0   0    0.59    0.42
  -7   0   0    1.33    0.43
  -7   0   0    0.91    0.30
  -8  -1   3    1.40    0.45
  -8  -1   3    1.50    0.52
  -9  -2   6    0.06    0.48
  -9  -2   6    0.87    0.57
   4  -4  11    0.14    0.42
  -4   4 -11   -0.31    0.38
  -4   4 -11    0.07    0.38
   5  -3   8    0.04    0.32
  -5   3  -8    0.25    0.41
  -5   3  -8    0.15    0.19
  -5   3  -8    0.46    0.38
   6  -2   5   -0.10    0.23
  -6   2  -5    0.42    0.27
  -6   2  -5    0.26    0.39
  -6   2  -5   -0.18    0.36
  -6   2  -5    0.40    0.28
  -7   1  -2   48.35    3.56
  -7   1  -2   49.79    3.41
  -7   1  -2   55.71    3.44
  -7   1  -2   49.08    3.50
  -8   0   1   48.84    3.57
  -8   0   1   50.69    3.61
  -8   0   1   52.94    3.51
  -9  -1   4    0.05    0.38
  -9  -1   4   -0.05    0.47
   4  -5  13    0.46    0.56
  -4   5 -13    0.18    0.48
  -4   5 -13    0.63    0.56
   5  -4  10    0.57    0.44
  -5   4 -10    1.34    0.51
  -5   4 -10    1.47    0.50
   6  -3   7   40.99    2.87
  -6   3  -7   39.82    2.98
  -6   3  -7   42.45    2.92
  -6   3  -7   41.32    2.80
   7  -2   4    0.04    0.22
  -7   2  -4    0.39    0.40
  -7   2  -4    0.37    0.32
  -7   2  -4    0.57    0.28
  -8   1  -1   10.88    1.08
  -8   1  -1   10.05    1.15
  -8   1  -1   11.61    0.97
  -9   0   2    0.37    0.45
  -9   0   2   -0.26    0.42
  -9   0   2   -0.30    0.32
 -10  -1   5   -0.03    0.42
 -10  -1   5    0.77    0.58
   5  -5  12   -0.87    0.38
  -5   5 -12    0.00    0.45
  -5   5 -12   -0.51    0.40
   6  -4   9   -0.26    0.35
  -6   4  -9    0.58    0.42
  -6   4  -9    0.00    0.43
   7  -3   6    0.44    0.30
  -7   3  -6    0.40    0.29
  -7   3  -6    0.25    0.32
  -7   3  -6   -0.30    0.39
  -8   2  -3   53.52    3.72
  -8   2  -3   58.78    3.69
  -8   2  -3   48.53    3.66
  -8   2  -3   55.47    3.81
  -9   1   0    8.78    0.88
  -9   1   0    8.71    1.05
  -9   1   0    8.77    1.02
 -10   0   3    1.04    0.48
 -10   0   3    0.79    0.55
   6  -5  11    4.39    0.72
  -6   5 -11    3.94    0.75
  -6   5 -11    3.14    0.72
   7  -4   8   12.46    1.09
  -7   4  -8   13.73    1.30
  -7   4  -8   10.14    1.16
  -7   4  -8   12.51    1.05
   8  -3   5    0.39    0.28
  -8   3  -5    0.23    0.36
  -8   3  -5   -0.28    0.39
  -8   3  -5    0.07    0.29
  -9   2  -2    0.87    0.38
  -9   2  -2    1.74    0.54
  -9   2  -2    1.10    0.59
 -10   1   1    2.02    0.61
 -10   1   1    2.91    0.59
 -10   1   1    2.88    0.70
   7  -5  10   -0.17    0.38
  -7   5 -10   -0.10    0.44
  -7   5 -10   -0.73    0.40
   8  -4   7    1.50    0.42
  -8   4  -7    1.89    0.44
  -8   4  -7    1.72    0.58
  -8   4  -7    0.95    0.46
  -9   3  -4    3.14    0.60
  -9   3  -4    2.35    0.62
  -9   3  -4    2.84    0.55
 -10   2  -1   -0.04    0.46
 -10   2  -1    0.76    0.53
 -10   2  -1    0.10    0.37
 -11   1   2    7.19    0.95
 -11   1   2    8.02    1.07
 -11   1   2    5.92    0.99
   8  -5   9    2.80    0.58
  -8   5  -9    2.03    0.62
  -8   5  -9    3.16    0.71
   9  -4   6    3.75    0.77
  -9   4  -6    3.07    0.71
  -9   4  -6    4.26    0.64
  -9   4  -6    2.03    0.54
 -10   3  -3    2.04    0.58
 -10   3  -3    2.50    0.54
 -10   3  -3    2.27    0.63
 -11   2   0    0.02    0.56
 -11   2   0    0.17    0.52
 -11   2   0    0.41    0.45
   9  -5   8    1.40    0.45
  -9   5  -8    0.91    0.59
  -9   5  -8    0.84    0.47
 -10   4  -5    3.89    0.68
 -10   4  -5    3.81    0.76
 -10   4  -5    2.92    0.65
 -11   3  -2    0.38    0.48
 -11   3  -2    0.58    0.61
 -11   3  -2    0.51    0.41
 -10   5  -7    5.54    0.96
 -11   4  -4    1.59    0.60
 -11   4  -4    1.67    0.62
 -11   4  -4    1.46    0.51
 -10   9   0   -0.02    0.49
 -10   9   0   -0.09    0.54
 -10   9   0   -0.78    0.47
  10  -9   0    0.12    0.52
  -9  10  -3    0.14    0.57
  -9  10  -3   -0.44    0.56
  -9  10  -3   -0.84    0.54
  -9  10  -3   -0.63    0.44
   9 -10   3    0.20    0.51
  -8  11  -6    0.40    0.51
   8 -11   6    0.22    0.53
 -10   8   2    0.88    0.60
 -10   8   2    0.52    0.58
  10  -8  -2    1.69    0.63
  -9   9  -1    1.25    0.59
  -9   9  -1    0.67    0.55
  -9   9  -1    0.70    0.56
   9  -9   1    0.24    0.49
  -8  10  -4    3.06    0.75
  -8  10  -4    3.79    0.85
   8 -10   4    3.48    0.72
  -7  11  -7    0.59    0.56
  -7  11  -7   -0.34    0.54
   7 -11   7    1.42    0.58
   7 -11   7    0.35    0.55
 -10   7   4   -0.56    0.55
 -10   7   4    1.78    0.71
  10  -7  -4    1.32    0.58
  -9   8   1    5.78    0.83
  -9   8   1    4.94    0.89
  -9   8   1    4.60    0.83
   9  -8  -1    6.16    0.90
  -8   9  -2   -0.41    0.56
  -8   9  -2    0.47    0.48
   8  -9   2    0.13    0.46
  -7  10  -5    1.86    0.61
  -7  10  -5    2.43    0.76
   7 -10   5    2.33    0.61
   7 -10   5    1.48    0.59
  -6  11  -8    0.27    0.53
  -6  11  -8    0.79    0.67
   6 -11   8   -0.05    0.48
   6 -11   8   -0.18    0.45
  -9   7   3   -0.14    0.48
  -9   7   3    0.59    0.53
   9  -7  -3   -0.10    0.46
  -8   8   0    1.88    0.60
  -8   8   0    2.72    0.60
  -8   8   0    2.03    0.63
   8  -8   0    0.95    0.50
   8  -8   0    1.54    0.57
  -7   9  -3    0.20    0.44
  -7   9  -3   -0.16    0.57
   7  -9   3   -0.13    0.43
   7  -9   3   -0.37    0.42
  -6  10  -6    0.24    0.57
  -6  10  -6    0.06    0.46
   6 -10   6   -0.08    0.43
   6 -10   6    0.98    0.52
   6 -10   6   -0.18    0.42
  -5  11  -9    1.32    0.64
  -5  11  -9    0.54    0.56
  -5  11  -9   -0.42    0.50
  -5  11  -9    0.42    0.61
   5 -11   9    0.74    0.54
   5 -11   9    0.85    0.59
  -9   6   5   -0.20    0.44
  -9   6   5   -0.73    0.51
   9  -6  -5    0.80    0.52
  -8   7   2   -0.34    0.41
  -8   7   2    0.20    0.40
  -8   7   2   -0.59    0.43
   8  -7  -2    0.24    0.49
   8  -7  -2    0.06    0.45
  -7   8  -1   -0.03    0.45
  -7   8  -1    1.13    0.53
   7  -8   1    0.42    0.43
   7  -8   1    0.79    0.46
  -6   9  -4    6.37    0.94
  -6   9  -4    4.83    0.81
   6  -9   4    4.69    0.73
   6  -9   4    5.98    0.85
   6  -9   4    4.43    0.74
  -5  10  -7    0.92    0.58
  -5  10  -7    0.39    0.51
  -5  10  -7    0.15    0.42
  -5  10  -7    0.44    0.55
   5 -10   7    1.28    0.55
   5 -10   7    0.12    0.46
   5 -10   7    0.73    0.51
  -9   5   7    0.81    0.55
  -9   5   7    1.14    0.56
   9  -5  -7    0.23    0.51
  -8   6   4    1.16    0.57
  -8   6   4    0.50    0.49
   8  -6  -4    1.25    0.51
   8  -6  -4    0.32    0.43
  -7   7   1    0.78    0.43
  -7   7   1    1.09    0.51
   7  -7  -1    0.37    0.45
   7  -7  -1    1.06    0.46
  -6   8  -2   12.63    1.20
  -6   8  -2    8.01    1.06
   6  -8   2   12.35    1.08
   6  -8   2    8.82    1.11
  -5   9  -5    4.45    0.81
  -5   9  -5    6.24    0.90
   5  -9   5    5.08    0.75
   5  -9   5    3.94    0.76
   5  -9   5    6.40    0.79
  -4  10  -8   -0.47    0.47
  -4  10  -8    0.75    0.53
  -4  10  -8    0.63    0.53
  -4  10  -8   -0.91    0.45
   4 -10   8   -0.10    0.50
   4 -10   8    0.37    0.46
   4 -10   8    0.07    0.50
  -8   5   6    0.19    0.47
  -8   5   6    0.57    0.51
   8  -5  -6   -0.19    0.45
   8  -5  -6    0.02    0.48
  -7   6   3    1.31    0.54
  -7   6   3    0.91    0.53
  -7   6   3    0.40    0.33
   7  -6  -3    1.93    0.50
   7  -6  -3    1.14    0.51
  -6   7   0    9.22    1.04
  -6   7   0   10.59    1.16
   6  -7   0   10.10    1.03
   6  -7   0    9.82    1.01
  -5   8  -3    0.32    0.50
  -5   8  -3   -0.17    0.35
   5  -8   3   -0.12    0.36
   5  -8   3   -0.42    0.36
   5  -8   3    0.32    0.40
  -4   9  -6    5.27    0.74
  -4   9  -6    3.18    0.73
  -4   9  -6    4.49    0.79
   4  -9   6    5.13    0.75
   4  -9   6    3.14    0.61
   4  -9   6    3.52    0.71
  -3  10  -9    1.38    0.64
  -3  10  -9    2.87    0.72
  -3  10  -9    2.07    0.63
   3 -10   9    2.70    0.69
   3 -10   9    2.82    0.66
   3 -10   9    2.62    0.60
  -8   4   8    1.86    0.63
  -8   4   8    0.95    0.61
   8  -4  -8    2.47    0.67
  -7   5   5    1.56    0.55
  -7   5   5    0.96    0.49
   7  -5  -5    2.01    0.55
   7  -5  -5    1.16    0.47
  -6   6   2    8.85    1.03
   6  -6  -2    7.43    0.99
   6  -6  -2   12.36    1.05
  -5   7  -1    4.63    0.75
  -5   7  -1    4.73    0.73
   5  -7   1    4.16    0.60
   5  -7   1    4.68    0.70
  -4   8  -4    3.90    0.70
  -4   8  -4    3.14    0.62
  -4   8  -4    4.42    0.64
   4  -8   4    3.08    0.57
   4  -8   4    3.89    0.62
   4  -8   4    2.48    0.61
  -3   9  -7    2.02    0.62
  -3   9  -7    2.23    0.60
  -3   9  -7    3.46    0.69
   3  -9   7    1.98    0.58
   3  -9   7    2.99    0.63
   3  -9   7    1.95    0.50
  -2  10 -10    5.73    0.98
  -2  10 -10    4.70    0.91
  -2  10 -10    6.27    0.89
   2 -10  10    4.66    0.92
   2 -10  10    4.27    0.75
   2 -10  10    4.49    0.83
  -7   4   7    0.21    0.47
  -7   4   7    0.97    0.55
   7  -4  -7    0.93    0.55
   7  -4  -7    0.16    0.42
  -6   5   4   63.31    4.46
  -6   5   4   69.15    4.39
  -6   5   4   65.01    4.19
   6  -5  -4   66.73    4.38
   6  -5  -4   56.04    4.42
  -5   6   1   13.25    1.18
  -5   6   1   10.70    1.11
   5  -6  -1   13.57    1.11
   5  -6  -1   12.82    1.14
  -4   7  -2   -0.38    0.38
  -4   7  -2   -0.38    0.30
   4  -7   2    0.02    0.32
   4  -7   2    0.36    0.34
  -3   8  -5    5.15    0.72
  -3   8  -5    3.75    0.72
  -3   8  -5    4.56    0.69
   3  -8   5    3.20    0.61
   3  -8   5    4.75    0.73
   3  -8   5    3.92    0.60
  -2   9  -8    2.44    0.58
  -2   9  -8    1.19    0.57
  -2   9  -8    1.40    0.58
   2  -9   8    2.69    0.65
   2  -9   8    1.80    0.51
   2  -9   8    1.64    0.53
  -1  10 -11   -0.17    0.58
  -1  10 -11   -0.29    0.49
   1 -10  11   -0.47    0.46
   1 -10  11   -0.55    0.50
   1 -10  11   -0.63    0.49
  -7   3   9    3.00    0.73
  -7   3   9    1.79    0.59
   7  -3  -9    3.58    0.69
   7  -3  -9    2.68    0.72
  -6   4   6    3.18    0.60
  -6   4   6    1.65    0.52
   6  -4  -6    1.04    0.49
   6  -4  -6    2.65    0.56
  -5   5   3   14.76    1.07
  -5   5   3   14.06    1.27
   5  -5  -3   13.00    1.19
   5  -5  -3   16.41    1.31
  -4   6   0    1.26    0.38
  -4   6   0    0.34    0.39
   4  -6   0    0.83    0.35
   4  -6   0    0.77    0.35
  -3   7  -3    8.35    0.86
  -3   7  -3    8.62    0.90
  -3   7  -3    8.83    0.95
   3  -7   3   10.37    0.92
   3  -7   3    6.77    0.87
   3  -7   3    8.68    0.84
  -2   8  -6   14.31    1.23
  -2   8  -6   13.45    1.26
  -2   8  -6   13.79    1.32
   2  -8   6   12.80    1.23
   2  -8   6   13.68    1.18
   2  -8   6   13.84    1.29
  -1   9  -9    0.71    0.59
  -1   9  -9    1.57    0.57
  -1   9  -9    1.57    0.58
   1  -9   9    1.70    0.61
   1  -9   9    0.78    0.47
   1  -9   9    1.97    0.57
  -6   3   8    4.92    0.68
  -6   3   8    2.53    0.66
   6  -3  -8    2.82    0.71
   6  -3  -8    3.42    0.65
  -5   4   5   22.53    1.65
  -5   4   5   20.74    1.67
   5  -4  -5   21.60    1.65
   5  -4  -5   18.74    1.66
  -4   5   2   26.30    2.04
   4  -5  -2   29.20    2.07
   4  -5  -2   28.29    2.00
  -3   6  -1   -0.49    0.31
  -3   6  -1    0.20    0.29
  -3   6  -1    0.04    0.27
   3  -6   1   -0.27    0.24
   3  -6   1    0.18    0.30
  -2   7  -4    0.46    0.36
  -2   7  -4   -0.06    0.37
  -2   7  -4    0.24    0.34
  -2   7  -4   -0.32    0.30
   2  -7   4   -0.13    0.29
   2  -7   4    0.60    0.34
   2  -7   4    0.21    0.33
  -1   8  -7   57.53    3.69
  -1   8  -7   54.09    3.74
  -1   8  -7   50.49    3.70
   1  -8   7   46.28    3.72
   1  -8   7   52.51    3.61
   1  -8   7   54.33    3.65
   0   9 -10    1.32    0.60
   0   9 -10    1.07    0.59
   0  -9  10    0.52    0.60
   0  -9  10    0.94    0.48
   0  -9  10    0.31    0.47
  -6   2  10   -0.12    0.48
  -6   2  10   -0.19    0.37
   6  -2 -10   -0.25    0.41
   6  -2 -10    0.12    0.52
  -5   3   7    0.72    0.42
  -5   3   7    1.08    0.44
   5  -3  -7    0.53    0.42
   5  -3  -7    0.04    0.38
  -4   4   4    2.73    0.49
   4  -4  -4    2.12    0.43
   4  -4  -4    1.46    0.46
  -3   5   1    3.11    0.49
  -3   5   1    1.85    0.38
   3  -5  -1    2.64    0.40
   3  -5  -1    1.83    0.42
  -2   6  -2   20.36    1.46
  -2   6  -2   19.27    1.46
  -2   6  -2   19.22    1.51
   2  -6   2   20.06    1.46
   2  -6   2   18.70    1.50
   2  -6   2   18.64    1.41
  -1   7  -5   10.87    1.10
  -1   7  -5   11.45    1.01
  -1   7  -5    9.95    1.00
   1  -7   5   12.36    0.98
   1  -7   5   10.30    0.97
   1  -7   5   10.82    1.06
   0   8  -8    0.51    0.50
   0   8  -8   -0.49    0.42
   0   8  -8    0.25    0.38
   0  -8   8   -0.04    0.36
   0  -8   8    0.51    0.54
   0  -8   8    0.46    0.42
   1   9 -11    0.36    0.62
   1   9 -11    0.86    0.61
  -1  -9  11    0.31    0.47
  -1  -9  11    0.55    0.62
  -1  -9  11    0.80    0.53
  -5   2   9    0.14    0.37
  -5   2   9   -0.53    0.36
   5  -2  -9   -0.01    0.41
   5  -2  -9    0.04    0.45
  -4   3   6   16.11    1.27
  -4   3   6   14.77    1.34
   4  -3  -6   16.08    1.29
   4  -3  -6   16.15    1.38
  -3   4   3   36.81    2.57
  -3   4   3   35.05    2.59
   3  -4  -3   37.76    2.54
   3  -4  -3   38.86    2.62
  -2   5   0   11.93    0.89
  -2   5   0    8.59    0.87
  -2   5   0   11.40    0.96
   2  -5   0   10.91    0.92
   2  -5   0   10.97    0.86
  -1   6  -3   14.56    1.16
  -1   6  -3   11.81    1.07
  -1   6  -3   13.95    1.08
   1  -6   3   12.94    1.03
   1  -6   3   14.67    1.10
   1  -6   3   12.48    1.11
   0   7  -6    8.71    0.95
   0   7  -6    9.46    0.95
   0   7  -6   10.07    1.07
   0  -7   6    8.97    0.91
   0  -7   6    8.95    0.88
   0  -7   6    9.26    1.03
   1   8  -9    3.09    0.74
   1   8  -9    3.65    0.70
  -1  -8   9    3.03    0.57
  -1  -8   9    2.89    0.60
  -1  -8   9    2.80    0.71
  -5   1  11    7.67    1.10
   5  -1 -11    6.75    1.11
   5  -1 -11    8.80    1.02
  -4   2   8    5.80    0.68
  -4   2   8    5.48    0.76
   4  -2  -8    5.63    0.73
   4  -2  -8    4.80    0.81
  -3   3   5    0.16    0.29
   3  -3  -5   -0.13    0.31
   3  -3  -5    0.74    0.31
  -2   4   2    4.44    0.50
  -2   4   2    2.94    0.45
   2  -4  -2    2.97    0.41
   2  -4  -2    4.13    0.50
  -1   5  -1   23.50    1.70
  -1   5  -1   24.51    1.64
  -1   5  -1   21.27    1.63
   1  -5   1   22.30    1.60
   1  -5   1   23.61    1.67
   0   6  -4    5.34    0.68
   0   6  -4    5.44    0.61
   0   6  -4    4.93    0.60
   0  -6   4    5.11    0.54
   0  -6   4    3.94    0.63
   0  -6   4    4.89    0.58
   1   7  -7    5.33    0.75
   1   7  -7    7.64    0.83
   1   7  -7    6.83    0.90
  -1  -7   7    6.39    0.75
  -1  -7   7    5.47    0.69
  -1  -7   7    5.04    0.78
   2   8 -10    1.45    0.63
   2   8 -10    0.58    0.59
  -2  -8  10    1.17    0.51
  -2  -8  10    0.67    0.54
  -2  -8  10    0.39    0.41
  -4   1  10    0.22    0.44
  -4   1  10    0.11    0.41
   4  -1 -10    0.15    0.46
   4  -1 -10   -0.09    0.39
  -3   2   7    2.34    0.42
  -3   2   7    2.11    0.46
   3  -2  -7    2.82    0.47
   3  -2  -7    0.89    0.45
  -2   3   4    2.74    0.43
   2  -3  -4    2.87    0.49
   2  -3  -4    3.67    0.43
  -1   4   1   29.91    2.00
  -1   4   1   30.28    2.03
  -1   4   1   27.51    2.00
   1  -4  -1   28.85    2.03
   1  -4  -1   29.27    1.96
   0   5  -2  107.40    7.15
   0   5  -2  111.59    7.21
   0   5  -2  111.36    7.14
   0  -5   2  106.67    7.19
   0  -5   2  112.00    7.11
   0  -5   2  107.67    7.13
   1   6  -5    5.05    0.78
   1   6  -5    6.89    0.71
   1   6  -5    6.39    0.73
  -1  -6   5    6.18    0.67
  -1  -6   5    6.91    0.65
  -1  -6   5    7.07    0.76
   2   7  -8    0.90    0.47
   2   7  -8    1.19    0.54
  -2  -7   8    0.08    0.33
  -2  -7   8    0.54    0.39
  -2  -7   8    0.63    0.47
   3   8 -11    0.03    0.55
   3   8 -11    0.02    0.58
  -3  -8  11    0.32    0.52
  -3  -8  11    0.71    0.50
  -3  -8  11    0.12    0.42
  -4   0  12    0.60    0.51
   4   0 -12    0.78    0.55
   4   0 -12    0.62    0.46
   4   0 -12    0.11    0.46
  -3   1   9    1.08    0.34
  -3   1   9    1.24    0.44
   3  -1  -9    0.91    0.48
   3  -1  -9    1.22    0.43
  -2   2   6   19.32    1.42
   2  -2  -6   15.99    1.45
   2  -2  -6   19.20    1.37
  -1   3   3  113.57    7.75
  -1   3   3  123.59    7.77
   1  -3  -3  122.32    7.80
   1  -3  -3  118.25    7.73
   0   4   0   13.38    1.00
   0   4   0   14.69    1.08
   0   4   0   13.04    0.99
   0  -4   0   13.95    1.04
   0  -4   0   14.28    0.96
   1   5  -3    2.77    0.48
   1   5  -3    2.67    0.38
   1   5  -3    2.63    0.38
   1   5  -3    1.99    0.36
  -1  -5   3    1.67    0.37
  -1  -5   3    2.57    0.37
  -1  -5   3    2.79    0.33
   2   6  -6    0.32    0.42
   2   6  -6    0.84    0.35
   2   6  -6    0.62    0.39
  -2  -6   6    0.54    0.41
  -2  -6   6    0.52    0.31
  -2  -6   6    1.36    0.36
   3   7  -9    0.48    0.53
   3   7  -9    1.26    0.57
  -3  -7   9    1.25    0.58
  -3  -7   9    1.61    0.50
  -3  -7   9    1.39    0.43
  -3   0  11    0.27    0.44
  -3   0  11    0.44    0.49
   3   0 -11    0.31    0.41
   3   0 -11    0.32    0.37
   3   0 -11   -0.31    0.48
  -2   1   8    1.82    0.45
  -2   1   8    1.23    0.34
   2  -1  -8    2.56    0.46
   2  -1  -8    1.48    0.50
  -1   2   5   34.63    2.40
   1  -2  -5   33.89    2.35
   1  -2  -5   36.03    2.45
   0   3   2   12.14    0.87
   0   3   2   13.08    0.90
   0  -3  -2   11.83    0.81
   0  -3  -2   11.52    0.81
   0  -3  -2   10.88    0.90
   1   4  -1   53.98    3.52
   1   4  -1   55.85    3.60
  -1  -4   1   52.89    3.45
  -1  -4   1   51.21    3.45
  -1  -4   1   54.27    3.55
   2   5  -4   10.55    0.79
   2   5  -4    8.75    0.82
   2   5  -4    7.98    0.88
  -2  -5   4    8.46    0.71
  -2  -5   4    9.49    0.88
  -2  -5   4    8.50    0.76
   3   6  -7   -0.13    0.37
   3   6  -7    0.36    0.43
  -3  -6   7    0.70    0.44
  -3  -6   7   -0.57    0.30
  -3  -6   7    0.11    0.27
   4   7 -10    1.07    0.61
   4   7 -10    0.80    0.60
  -4  -7  10    0.65    0.45
  -4  -7  10    1.77    0.44
  -4  -7  10    0.07    0.53
  -3  -1  13   11.32    1.29
   3   1 -13   10.53    1.15
   3   1 -13   10.14    1.43
  -2   0  10    1.09    0.43
  -2   0  10    0.49    0.47
   2   0 -10    0.09    0.43
   2   0 -10    0.26    0.39
   2   0 -10    1.26    0.36
  -1   1   7    0.30    0.24
  -1   1   7    0.18    0.27
   1  -1  -7    0.53    0.17
   1  -1  -7    0.13    0.27
   1  -1  -7   -0.61    0.31
   0   2   4    0.50    0.24
   0  -2  -4   -0.05    0.23
   0  -2  -4    0.06    0.13
   0  -2  -4    0.03    0.16
   0  -2  -4    0.18    0.16
  -1  -3  -1    0.33    0.18
  -1  -3  -1    0.35    0.18
   2   4  -2    2.87    0.46
   2   4  -2    3.28    0.37
  -2  -4   2    2.29    0.38
  -2  -4   2    3.61    0.38
   3   5  -5    1.18    0.35
   3   5  -5    0.48    0.26
   3   5  -5    0.93    0.45
  -3  -5   5    0.47    0.39
  -3  -5   5    0.25    0.21
  -3  -5   5    0.85    0.28
   4   6  -8    4.43    0.71
   4   6  -8    2.84    0.70
  -4  -6   8    3.86    0.59
  -4  -6   8    2.02    0.63
  -4  -6   8    3.48    0.49
  -2  -1  12    1.91    0.60
   2   1 -12    2.25    0.72
   2   1 -12    2.37    0.55
  -1   0   9   16.20    1.32
  -1   0   9   12.51    1.22
   1   0  -9   16.01    1.13
   1   0  -9   16.21    1.22
   1   0  -9   13.15    1.36
   1   0  -9   15.05    1.10
   0   1   6    1.22    0.29
   0  -1  -6    2.18    0.30
   0  -1  -6    0.81    0.35
   0  -1  -6    1.73    0.26
   1   2   3   32.96    2.25
  -1  -2  -3   35.86    2.29
  -1  -2  -3   35.47    2.30
  -1  -2  -3   32.68    2.30
   2   3   0   18.99    1.39
  -2  -3   0   18.81    1.30
  -2  -3   0   19.46    1.31
   3   4  -3    2.21    0.47
   3   4  -3    2.45    0.36
  -3  -4   3    1.36    0.35
  -3  -4   3    2.25    0.29
   4   5  -6    0.53    0.38
   4   5  -6    0.67    0.45
  -4  -5   6    0.71    0.25
  -4  -5   6    0.96    0.31
  -4  -5   6    0.37    0.39
   5   6  -9    1.63    0.61
   5   6  -9    1.41    0.62
  -5  -6   9    1.93    0.41
  -5  -6   9    2.32    0.68
  -5  -6   9    2.05    0.51
  -1  -1  11    2.47    0.58
   1   1 -11    1.42    0.60
   1   1 -11    2.43    0.50
   0   0   8    0.55    0.30
   0   0   8    0.45    0.39
   0   0  -8    0.74    0.27
   0   0  -8    0.49    0.18
   0   0  -8    0.37    0.36
   0   0  -8    0.45    0.28
  -1  -1  -5    4.70    0.51
  -1  -1  -5    4.53    0.48
   2   2   2  232.13   14.39
  -2  -2  -2  233.30   14.44
  -2  -2  -2  209.61   14.33
  -2  -2  -2  220.04   14.33
   3   3  -1   36.31    2.59
  -3  -3   1   38.02    2.50
  -3  -3   1   38.08    2.50
   4   4  -4    6.81    0.83
   4   4  -4    7.84    0.69
  -4  -4   4    6.00    0.73
  -4  -4   4    6.99    0.59
   5   5  -7    4.44    0.82
   5   5  -7    5.82    0.75
  -5  -5   7    3.53    0.71
  -5  -5   7    5.05    0.49
  -5  -5   7    4.17    0.58
  -1  -2  13    3.01    0.72
   1   2 -13    2.59    0.57
   1   2 -13    1.72    0.65
   0  -1  10    0.17    0.40
   0   1 -10   -0.08    0.26
   0   1 -10   -0.50    0.20
   0   1 -10    0.16    0.31
   0   1 -10    0.36    0.45
   1   0   7   12.94    1.11
   1   0   7   14.26    1.04
  -1   0  -7   13.50    1.05
  -1   0  -7   13.05    0.97
  -1   0  -7   13.41    1.15
  -2  -1  -4   49.19    3.32
  -2  -1  -4   50.08    3.29
  -2  -1  -4   49.75    3.27
   3   2   1    8.25    0.70
  -3  -2  -1    8.11    0.78
   4   3  -2   14.99    1.21
   4   3  -2   15.28    1.06
  -4  -3   2   14.41    1.19
  -4  -3   2   14.68    1.00
  -4  -3   2   14.12    1.11
  -4  -3   2   15.56    1.12
   5   4  -5    4.15    0.60
   5   4  -5    3.75    0.68
  -5  -4   5    4.42    0.48
  -5  -4   5    5.02    0.69
   6   5  -8    1.08    0.49
   6   5  -8    0.36    0.56
  -6  -5   8    0.48    0.47
  -6  -5   8    0.17    0.21
   0  -2  12    3.49    0.71
   0   2 -12    1.11    0.58
   0   2 -12    3.11    0.55
   0   2 -12    3.73    0.53
   1  -1   9    0.77    0.42
  -1   1  -9   -0.18    0.24
  -1   1  -9    0.54    0.42
  -1   1  -9    0.58    0.32
   2   0   6    9.77    0.86
  -2   0  -6   10.83    0.89
  -2   0  -6    9.75    0.87
   3   1   3    1.87    0.26
  -3  -1  -3    2.14    0.41
  -4  -2   0    3.02    0.26
  -4  -2   0    2.65    0.43
  -4  -2   0    2.14    0.44
  -4  -2   0    2.56    0.25
   5   3  -3    0.77    0.26
  -5  -3   3    0.33    0.37
  -5  -3   3    0.50    0.30
  -5  -3   3    0.24    0.14
   6   4  -6    1.27    0.53
   6   4  -6    0.60    0.42
  -6  -4   6    0.80    0.43
  -6  -4   6    0.18    0.48
  -6  -4   6    1.09    0.30
   7   5  -9    1.67    0.68
  -7  -5   9    0.60    0.55
   1  -2  11   18.45    1.56
  -1   2 -11   18.05    1.62
  -1   2 -11   17.97    1.39
  -1   2 -11   17.58    1.42
   2  -1   8    5.05    0.66
  -2   1  -8    4.34    0.40
  -2   1  -8    5.05    0.61
  -2   1  -8    3.45    0.62
   3   0   5   26.44    1.78
  -3   0  -5   23.63    1.74
  -3   0  -5   24.92    1.83
  -3   0  -5   26.71    1.77
   4   1   2   41.00    2.69
  -4  -1  -2   41.26    2.85
  -4  -1  -2   41.33    2.79
  -5  -2   1    0.91    0.23
  -5  -2   1    0.32    0.34
  -5  -2   1    1.22    0.42
  -5  -2   1    0.35    0.20
   6   3  -4   -0.12    0.26
  -6  -3   4   -0.02    0.33
  -6  -3   4    0.29    0.15
  -6  -3   4    0.59    0.42
   7   4  -7    0.04    0.44
  -7  -4   7    0.07    0.40
  -7  -4   7    1.14    0.60
   1  -3  13    2.77    0.70
  -1   3 -13    2.32    0.51
  -1   3 -13    2.68    0.70
  -1   3 -13    2.34    0.51
   2  -2  10    7.38    0.86
  -2   2 -10    6.57    0.88
  -2   2 -10    6.46    0.62
  -2   2 -10    6.19    0.75
   3  -1   7   36.57    2.54
  -3   1  -7   37.98    2.59
  -3   1  -7   34.65    2.55
   4   0   4    1.36    0.26
  -4   0  -4    1.29    0.28
  -4   0  -4    1.05    0.21
  -4   0  -4    0.83    0.36
  -4   0  -4    1.52    0.23
  -5  -1  -1   -0.07    0.27
   6   2  -2    2.11    0.33
  -6  -2   2    2.50    0.49
  -6  -2   2    2.39    0.39
  -6  -2   2    1.69    0.37
  -7  -3   5    0.79    0.48
  -7  -3   5    1.24    0.45
   8   4  -8    2.69    0.73
  -8  -4   8    1.79    0.62
   2  -3  12    8.78    1.05
  -2   3 -12    8.86    0.80
  -2   3 -12    9.65    0.96
  -2   3 -12    5.13    0.94
   3  -2   9   33.79    2.57
  -3   2  -9   36.35    2.58
  -3   2  -9   37.21    2.63
   4  -1   6    9.38    0.81
  -4   1  -6    9.04    0.73
  -4   1  -6    8.82    0.83
  -4   1  -6    8.42    0.80
  -4   1  -6    9.39    0.91
   5   0   3   18.54    1.24
  -5   0  -3   16.78    1.20
  -5   0  -3   18.46    1.21
  -5   0  -3   18.04    1.44
  -5   0  -3   18.63    1.34
  -6  -1   0    3.25    0.58
  -6  -1   0    2.51    0.48
  -6  -1   0    2.78    0.34
  -6  -1   0    2.99    0.35
  -7  -2   3    1.79    0.50
  -7  -2   3    0.58    0.36
  -8  -3   6    0.92    0.55
  -8  -3   6    0.37    0.44
   3  -3  11    2.88    0.61
  -3   3 -11    1.85    0.59
  -3   3 -11    2.49    0.54
  -3   3 -11    2.17    0.31
   4  -2   8   10.27    0.98
  -4   2  -8   10.20    1.00
  -4   2  -8   10.99    1.04
   5  -1   5    0.78    0.26
  -5   1  -5    0.38    0.24
  -5   1  -5    0.66    0.26
  -5   1  -5    1.21    0.41
  -5   1  -5    0.37    0.23
  -6   0  -2    0.14    0.30
  -6   0  -2   -0.10    0.15
  -6   0  -2    0.43    0.39
  -6   0  -2   -0.15    0.14
  -7  -1   1  101.37    6.74
  -7  -1   1  102.23    6.87
  -7  -1   1  104.28    6.83
  -8  -2   4    1.38    0.47
  -8  -2   4    1.72    0.56
  -9  -3   7   -0.02    0.47
  -9  -3   7    0.05    0.52
   3  -4  13    1.30    0.59
  -3   4 -13    0.91    0.32
  -3   4 -13    1.10    0.63
  -3   4 -13    2.19    0.55
   4  -3  10    3.26    0.56
  -4   3 -10    0.35    0.40
   5  -2   7    0.24    0.31
  -5   2  -7    0.50    0.42
  -5   2  -7    0.54    0.23
  -5   2  -7    1.06    0.36
   6  -1   4    0.41    0.21
  -6   1  -4    0.75    0.31
  -6   1  -4    0.08    0.21
  -6   1  -4    0.36    0.22
  -6   1  -4   -0.03    0.38
  -7   0  -1   25.87    1.94
  -7   0  -1   27.07    1.88
  -7   0  -1   24.23    1.72
  -7   0  -1   23.26    1.72
  -8  -1   2    4.01    0.70
  -8  -1   2    3.58    0.56
  -8  -1   2    5.05    0.75
  -9  -2   5    0.58    0.47
  -9  -2   5    0.34    0.55
   4  -4  12    0.53    0.51
  -4   4 -12    0.78    0.53
  -4   4 -12    1.31    0.53
   5  -3   9    3.50    0.60
  -5   3  -9    4.02    0.66
  -5   3  -9    2.35    0.56
   6  -2   6   20.71    1.59
  -6   2  -6   21.13    1.58
  -6   2  -6   23.46    1.64
  -6   2  -6   22.38    1.78
   7  -1   3    1.16    0.21
  -7   1  -3    0.83    0.39
  -7   1  -3    1.18    0.27
  -7   1  -3    0.59    0.23
  -7   1  -3    0.75    0.44
  -8   0   0   31.11    2.10
  -8   0   0   30.05    2.23
  -8   0   0   26.36    2.24
  -9  -1   3    5.84    0.80
  -9  -1   3    6.25    0.90
   5  -4  11    6.93    0.91
  -5   4 -11    6.44    0.92
  -5   4 -11    5.95    0.88
   6  -3   8    0.53    0.35
  -6   3  -8    0.45    0.47
  -6   3  -8    1.64    0.44
  -6   3  -8    1.36    0.31
   7  -2   5    0.05    0.25
  -7   2  -5    0.15    0.27
  -7   2  -5    0.05    0.39
  -7   2  -5   -0.79    0.25
  -8   1  -2    1.81    0.59
  -8   1  -2    1.20    0.33
  -8   1  -2    1.00    0.46
  -9   0   1    0.81    0.56
  -9   0   1    0.32    0.33
  -9   0   1    0.62    0.48
 -10  -1   4    0.38    0.44
 -10  -1   4    1.16    0.62
   6  -4  10    0.03    0.38
  -6   4 -10    0.01    0.41
  -6   4 -10    0.27    0.41
   7  -3   7    0.93    0.36
  -7   3  -7    1.17    0.43
  -7   3  -7    0.92    0.35
  -7   3  -7    1.25    0.54
  -8   2  -4    2.10    0.54
  -8   2  -4    1.30    0.37
  -8   2  -4    2.31    0.50
  -9   1  -1    1.15    0.52
  -9   1  -1    0.55    0.34
  -9   1  -1    1.03    0.49
 -10   0   2    1.23    0.59
 -10   0   2    1.79    0.49
 -10   0   2    0.96    0.57
   7  -4   9    0.57    0.39
  -7   4  -9    0.65    0.52
  -7   4  -9   -0.16    0.38
   8  -3   6    0.38    0.30
  -8   3  -6    0.88    0.38
  -8   3  -6    1.94    0.56
  -8   3  -6    0.80    0.41
  -9   2  -3    6.45    0.78
  -9   2  -3    7.43    0.98
  -9   2  -3    8.48    0.94
 -10   1   0    0.10    0.36
 -10   1   0   -0.54    0.49
 -10   1   0    0.83    0.53
  -7   5 -11    0.43    0.51
   8  -4   8    1.18    0.43
  -8   4  -8    0.15    0.50
  -8   4  -8    0.45    0.43
  -9   3  -5    6.83    0.98
  -9   3  -5    7.19    0.82
  -9   3  -5    6.29    0.83
 -10   2  -2    0.49    0.49
 -10   2  -2   -0.34    0.31
 -10   2  -2    0.39    0.52
 -11   1   1    1.26    0.61
 -11   1   1    0.13    0.55
 -11   1   1    0.67    0.44
  -9   4  -7    1.39    0.45
  -9   4  -7    1.39    0.49
  -9   4  -7    0.67    0.54
 -10   3  -4    8.13    1.14
 -10   3  -4    8.98    1.02
 -10   3  -4    7.77    0.94
 -11   2  -1    3.12    0.74
 -11   2  -1    1.61    0.63
 -11   2  -1    1.84    0.51
 -10   4  -6    0.99    0.48
 -10   4  -6    1.76    0.53
 -10   4  -6    0.10    0.48
 -10   4  -6    0.56    0.47
 -11   3  -3    0.47    0.51
 -11   3  -3    0.41    0.64
 -11   3  -3    0.48    0.44
 -10   9   1    3.64    0.82
 -10   9   1    2.30    0.71
  10  -9  -1    2.46    0.72
  -9  10  -2    2.43    0.67
  -9  10  -2    1.62    0.63
  -9  10  -2    1.71    0.77
  -9  10  -2    1.68    0.66
   9 -10   2    1.17    0.60
  -8  11  -5    2.49    0.75
  -8  11  -5    2.71    0.82
   8 -11   5    1.90    0.65
 -10   8   3    4.79    1.01
 -10   8   3    9.07    1.13
  10  -8  -3    8.70    1.09
  -9   9   0    0.79    0.54
  -9   9   0    0.16    0.48
  -9   9   0   -0.31    0.52
   9  -9   0    0.65    0.51
  -8  10  -3    5.54    0.96
  -8  10  -3    4.17    0.92
   8 -10   3    6.78    0.89
  -7  11  -6    0.45    0.51
  -7  11  -6    2.62    0.81
   7 -11   6    2.29    0.62
   7 -11   6    1.40    0.61
  -9   8   2   -0.03    0.50
  -9   8   2    0.62    0.54
   9  -8  -2    0.24    0.52
  -8   9  -1    0.42    0.60
  -8   9  -1    0.85    0.54
  -8   9  -1    0.25    0.50
   8  -9   1    0.54    0.52
   8  -9   1    1.14    0.56
  -7  10  -4    1.23    0.66
  -7  10  -4    1.11    0.55
   7 -10   4    1.26    0.59
   7 -10   4    2.10    0.59
  -6  11  -7    0.34    0.51
  -6  11  -7    1.00    0.69
   6 -11   7   -0.03    0.46
   6 -11   7   -0.67    0.47
  -9   7   4    0.54    0.53
  -9   7   4    0.72    0.56
   9  -7  -4    0.51    0.53
  -8   8   1    3.30    0.71
  -8   8   1    3.82    0.77
  -8   8   1    5.86    0.76
   8  -8  -1    4.59    0.80
   8  -8  -1    3.60    0.72
  -7   9  -2    0.04    0.55
  -7   9  -2    0.21    0.47
   7  -9   2   -0.14    0.41
   7  -9   2    0.52    0.49
  -6  10  -5    0.52    0.49
  -6  10  -5    0.66    0.61
   6 -10   5    0.87    0.51
   6 -10   5    0.76    0.48
   6 -10   5    0.69    0.50
  -5  11  -8    5.42    0.84
  -5  11  -8    5.32    0.97
  -5  11  -8    3.29    0.84
   5 -11   8    4.34    0.86
   5 -11   8    4.87    0.85
   5 -11   8    5.31    0.80
  -9   6   6    1.15    0.60
  -9   6   6   -0.07    0.49
   9  -6  -6    0.51    0.55
  -8   7   3    1.59    0.59
  -8   7   3    2.39    0.64
   8  -7  -3    2.09    0.57
   8  -7  -3    1.68    0.61
  -7   8   0    5.31    0.90
  -7   8   0    4.91    0.81
   7  -8   0    5.65    0.83
   7  -8   0    5.67    0.78
  -6   9  -3    2.23    0.65
  -6   9  -3    1.82    0.57
   6  -9   3    1.82    0.52
   6  -9   3    1.60    0.55
  -5  10  -6   -0.02    0.47
  -5  10  -6    0.36    0.58
  -5  10  -6    0.79    0.49
   5 -10   6    0.86    0.49
   5 -10   6    0.33    0.46
   5 -10   6    0.65    0.52
  -4  11  -9    0.08    0.52
  -4  11  -9   -0.02    0.49
  -4  11  -9   -0.02    0.60
  -4  11  -9    0.00    0.51
   4 -11   9   -0.24    0.52
   4 -11   9   -0.43    0.44
   4 -11   9    0.24    0.53
  -8   6   5    0.58    0.50
  -8   6   5    0.93    0.58
   8  -6  -5   -0.58    0.42
   8  -6  -5    0.29    0.46
  -7   7   2    1.28    0.42
  -7   7   2    2.24    0.60
   7  -7  -2    1.41    0.51
   7  -7  -2    1.28    0.50
  -6   8  -1    3.31    0.66
  -6   8  -1    2.49    0.68
   6  -8   1    2.28    0.59
   6  -8   1    3.21    0.58
  -5   9  -4    4.00    0.79
  -5   9  -4    3.32    0.68
   5  -9   4    4.26    0.69
   5  -9   4    4.02    0.65
   5  -9   4    3.71    0.68
  -4  10  -7    4.24    0.83
  -4  10  -7    5.01    0.88
  -4  10  -7    4.79    0.77
  -4  10  -7    3.91    0.79
   4 -10   7    3.50    0.77
   4 -10   7    2.78    0.61
   4 -10   7    4.08    0.75
   3 -11  10    0.06    0.57
  -8   5   7    6.51    1.01
  -8   5   7    7.00    0.95
   8  -5  -7    7.29    0.95
   8  -5  -7    5.23    0.96
  -7   6   4    3.49    0.74
  -7   6   4    5.70    0.78
   7  -6  -4    3.22    0.69
   7  -6  -4    4.06    0.66
  -6   7   1   99.57    6.61
  -6   7   1   98.81    6.62
   6  -7  -1   90.98    6.59
   6  -7  -1  101.91    6.54
  -5   8  -2    0.81    0.52
  -5   8  -2    0.26    0.40
   5  -8   2    0.53    0.41
   5  -8   2    0.26    0.42
  -4   9  -5    6.26    0.91
  -4   9  -5    7.18    0.88
  -4   9  -5    5.87    0.86
   4  -9   5    5.71    0.85
   4  -9   5    5.84    0.75
   4  -9   5    5.47    0.79
  -3  10  -8    0.26    0.51
  -3  10  -8    0.20    0.48
  -3  10  -8    0.35    0.53
  -3  10  -8    0.34    0.56
   3 -10   8    0.91    0.58
   3 -10   8    0.44    0.50
   3 -10   8    0.16    0.45
  -8   4   9    1.16    0.56
  -8   4   9    0.40    0.52
   8  -4  -9    0.12    0.51
  -7   5   6    0.77    0.51
  -7   5   6    0.53    0.46
   7  -5  -6    0.12    0.42
   7  -5  -6    0.50    0.48
  -6   6   3    5.42    0.76
  -6   6   3    3.37    0.46
   6  -6  -3    3.57    0.62
   6  -6  -3    4.67    0.74
  -5   7   0    0.00    0.35
  -5   7   0    0.55    0.44
   5  -7   0    0.00    0.38
   5  -7   0   -0.18    0.34
  -4   8  -3    4.25    0.68
  -4   8  -3    5.16    0.82
  -4   8  -3    6.13    0.73
   4  -8   3    6.31    0.71
   4  -8   3    4.54    0.73
   4  -8   3    5.43    0.71
  -3   9  -6    0.21    0.46
  -3   9  -6   -0.24    0.39
  -3   9  -6    0.25    0.43
  -3   9  -6   -0.83    0.41
   3  -9   6    0.45    0.40
   3  -9   6   -0.26    0.41
   3  -9   6    0.08    0.40
  -2  10  -9    2.89    0.71
  -2  10  -9    4.16    0.88
  -2  10  -9    2.49    0.74
   2 -10   9    4.39    0.82
   2 -10   9    3.27    0.71
   2 -10   9    2.52    0.59
  -7   4   8    2.39    0.62
  -7   4   8    1.57    0.59
   7  -4  -8    1.85    0.63
   7  -4  -8    1.82    0.58
  -6   5   5    4.58    0.74
  -6   5   5    5.42    0.79
   6  -5  -5    6.44    0.86
   6  -5  -5    4.10    0.69
  -5   6   2    3.93    0.64
  -5   6   2    4.21    0.69
   5  -6  -2    3.39    0.57
   5  -6  -2    3.82    0.66
  -4   7  -1    0.65    0.38
  -4   7  -1    0.67    0.45
   4  -7   1    0.79    0.41
   4  -7   1    0.61    0.35
  -3   8  -4    2.11    0.52
  -3   8  -4    2.90    0.62
  -3   8  -4    2.51    0.56
   3  -8   4    2.45    0.56
   3  -8   4    2.16    0.52
   3  -8   4    2.52    0.48
  -2   9  -7    0.92    0.46
  -2   9  -7    0.68    0.47
  -2   9  -7    0.40    0.53
   2  -9   7    0.57    0.40
   2  -9   7    0.08    0.43
   2  -9   7    0.26    0.44
  -1  10 -10    4.85    0.80
  -1  10 -10    4.44    0.87
   1 -10  10    3.17    0.64
   1 -10  10    3.08    0.70
   1 -10  10    3.32    0.81
  -7   3  10    3.85    0.66
  -7   3  10    2.72    0.70
   7  -3 -10    1.10    0.61
   7  -3 -10    1.24    0.63
  -6   4   7    3.18    0.64
  -6   4   7    2.58    0.64
   6  -4  -7    4.13    0.66
   6  -4  -7    3.17    0.71
  -5   5   4    2.40    0.56
   5  -5  -4    1.63    0.45
   5  -5  -4    2.14    0.56
  -4   6   1    2.78    0.56
  -4   6   1    3.20    0.54
   4  -6  -1    2.74    0.48
   4  -6  -1    3.53    0.61
  -3   7  -2    3.06    0.58
  -3   7  -2    2.00    0.47
  -3   7  -2    2.84    0.50
   3  -7   2    2.71    0.46
   3  -7   2    2.29    0.50
  -2   8  -5    8.99    0.98
  -2   8  -5   10.88    1.01
  -2   8  -5    8.19    1.01
   2  -8   5    9.70    1.02
   2  -8   5   10.28    0.96
   2  -8   5    8.71    0.90
  -1   9  -8   16.74    1.56
  -1   9  -8   16.64    1.50
  -1   9  -8   14.89    1.56
   1  -9   8   17.65    1.49
   1  -9   8   18.18    1.62
   1  -9   8   17.73    1.44
  -6   3   9    1.34    0.60
  -6   3   9    3.13    0.61
   6  -3  -9    2.12    0.66
   6  -3  -9    0.76    0.50
  -5   4   6    7.40    0.92
  -5   4   6    8.67    0.95
   5  -4  -6    8.61    0.93
   5  -4  -6    9.30    0.98
  -4   5   3   20.44    1.61
  -4   5   3   21.86    1.62
   4  -5  -3   18.97    1.61
   4  -5  -3   20.72    1.54
  -3   6   0    1.72    0.47
  -3   6   0    2.29    0.44
   3  -6   0    2.52    0.46
   3  -6   0    2.11    0.39
  -2   7  -3    0.14    0.36
  -2   7  -3    0.33    0.33
  -2   7  -3    0.46    0.33
   2  -7   3    0.70    0.37
   2  -7   3    0.06    0.29
   2  -7   3   -0.07    0.34
  -1   8  -6    1.18    0.53
  -1   8  -6    1.04    0.47
  -1   8  -6    1.72    0.49
   1  -8   6    1.20    0.50
   1  -8   6    1.19    0.45
   1  -8   6    1.13    0.40
   0   9  -9    6.66    0.99
   0   9  -9    7.41    0.96
   0  -9   9    5.81    0.82
   0  -9   9    9.51    1.19
   0  -9   9    6.64    0.89
  -6   2  11    3.08    0.75
   6  -2 -11    2.50    0.65
   6  -2 -11    1.76    0.69
  -5   3   8    1.55    0.47
  -5   3   8    1.09    0.49
   5  -3  -8    2.10    0.52
   5  -3  -8    1.81    0.56
  -4   4   5   -0.14    0.28
   4  -4  -5   -0.20    0.37
   4  -4  -5    0.25    0.34
  -3   5   2    1.16    0.36
  -3   5   2   -0.11    0.25
   3  -5  -2    0.30    0.31
   3  -5  -2    0.27    0.27
  -2   6  -1    2.55    0.48
  -2   6  -1    3.19    0.46
  -2   6  -1    2.36    0.43
   2  -6   1    2.45    0.46
   2  -6   1    2.28    0.38
  -1   7  -4    5.76    0.68
  -1   7  -4    4.92    0.70
  -1   7  -4    4.77    0.62
   1  -7   4    5.21    0.58
   1  -7   4    3.97    0.59
   1  -7   4    3.60    0.63
   0   8  -7    1.39    0.48
   0   8  -7   -0.05    0.41
   0   8  -7    0.43    0.49
   0  -8   7    1.07    0.42
   0  -8   7    0.98    0.52
   0  -8   7   -0.40    0.32
   1   9 -10    1.81    0.65
   1   9 -10    1.28    0.63
  -1  -9  10    1.71    0.59
  -1  -9  10    1.09    0.50
  -1  -9  10    0.36    0.59
  -5   2  10    0.01    0.44
  -5   2  10   -0.10    0.36
   5  -2 -10   -0.12    0.44
   5  -2 -10    0.42    0.45
  -4   3   7    0.87    0.42
  -4   3   7    1.18    0.42
   4  -3  -7    0.98    0.50
   4  -3  -7    1.30    0.42
  -3   4   4    0.41    0.29
   3  -4  -4    0.42    0.35
   3  -4  -4    0.56    0.31
  -2   5   1   74.15    4.96
  -2   5   1   74.63    4.94
   2  -5  -1   75.53    4.97
   2  -5  -1   73.54    4.90
  -1   6  -2    0.77    0.35
  -1   6  -2    0.95    0.32
  -1   6  -2    0.89    0.29
   1  -6   2    1.07    0.34
   1  -6   2    0.71    0.27
   1  -6   2    0.89    0.35
   0   7  -5   -0.19    0.34
   0   7  -5    0.45    0.33
   0   7  -5    0.22    0.34
   0   7  -5    0.39    0.41
   0  -7   5    0.52    0.35
   0  -7   5    0.17    0.29
   0  -7   5    0.27    0.41
   1   8  -8   -0.17    0.45
   1   8  -8    0.02    0.46
  -1  -8   8   -0.55    0.37
  -1  -8   8    0.13    0.35
  -1  -8   8    0.29    0.45
  -5   1  12    0.30    0.55
   5  -1 -12    1.49    0.66
   5  -1 -12    1.04    0.54
  -4   2   9    0.49    0.35
  -4   2   9   -0.22    0.37
   4  -2  -9   -0.11    0.40
   4  -2  -9    0.05    0.37
  -3   3   6    2.22    0.48
   3  -3  -6    3.57    0.50
   3  -3  -6    2.74    0.56
  -2   4   3    0.31    0.24
  -2   4   3    0.25    0.26
   2  -4  -3    0.49    0.25
   2  -4  -3    0.31    0.29
  -1   5   0   30.55    2.25
  -1   5   0   28.78    2.20
  -1   5   0   35.41    2.23
   1  -5   0   35.97    2.27
   1  -5   0   30.23    2.17
   0   6  -3    2.86    0.45
   0   6  -3    2.88    0.47
   0   6  -3    3.59    0.55
   0  -6   3    2.43    0.50
   0  -6   3    4.08    0.52
   0  -6   3    3.93    0.44
   1   7  -6    0.50    0.46
   1   7  -6   -0.03    0.36
   1   7  -6    0.68    0.36
  -1  -7   6   -0.07    0.33
  -1  -7   6    0.44    0.30
  -1  -7   6    0.02    0.38
   2   8  -9    1.86    0.61
   2   8  -9    2.36    0.68
  -2  -8   9    1.23    0.45
  -2  -8   9    1.11    0.49
  -2  -8   9    1.29    0.56
   4  -1 -11    4.88    0.75
   4  -1 -11    4.34    0.85
  -3   2   8   -0.22    0.29
  -3   2   8   -0.07    0.33
   3  -2  -8    0.05    0.40
   3  -2  -8   -0.03    0.33
  -2   3   5    6.44    0.74
   2  -3  -5    7.94    0.83
   2  -3  -5    9.59    0.74
  -1   4   2    9.23    0.79
  -1   4   2    9.74    0.76
   1  -4  -2    8.78    0.72
   1  -4  -2    9.04    0.81
   0   5  -1    0.49    0.24
   0   5  -1   -0.05    0.19
   0   5  -1    1.02    0.33
   0  -5   1    0.92    0.21
   0  -5   1    0.40    0.26
   1   6  -4    2.50    0.53
   1   6  -4    3.02    0.48
   1   6  -4    2.86    0.44
  -1  -6   4    2.32    0.47
  -1  -6   4    3.19    0.46
  -1  -6   4    4.03    0.43
   2   7  -7    1.36    0.50
   2   7  -7    1.37    0.44
  -2  -7   7    0.30    0.36
  -2  -7   7    0.18    0.30
  -2  -7   7    0.93    0.47
   3   8 -10    2.20    0.66
   3   8 -10    1.52    0.70
  -3  -8  10    1.74    0.48
  -3  -8  10    0.71    0.48
  -3  -8  10    0.98    0.57
  -3   1  10    9.98    1.13
   3  -1 -10   12.78    1.12
   3  -1 -10   12.44    1.27
  -2   2   7    3.25    0.46
  -2   2   7    3.41    0.53
   2  -2  -7    2.75    0.59
   2  -2  -7    3.28    0.48
  -1   3   4    1.55    0.31
  -1   3   4    2.59    0.33
   1  -3  -4    0.84    0.32
   1  -3  -4    2.39    0.32
   0   4   1   28.17    1.94
   0   4   1   29.52    1.99
   0  -4  -1   29.25    1.98
   0  -4  -1   27.17    1.88
   0  -4  -1   28.88    1.88
   1   5  -2    0.47    0.32
   1   5  -2    0.83    0.26
  -1  -5   2    0.59    0.28
  -1  -5   2    0.95    0.19
  -1  -5   2    0.35    0.25
  -1  -5   2    0.88    0.18
   2   6  -5    1.78    0.51
   2   6  -5    1.96    0.41
   2   6  -5    1.95    0.45
  -2  -6   5    1.77    0.48
  -2  -6   5    2.54    0.35
  -2  -6   5    2.35    0.41
   3   7  -8    0.13    0.46
   3   7  -8   -0.48    0.41
  -3  -7   8    0.13    0.35
  -3  -7   8   -0.19    0.30
  -3  -7   8    0.01    0.47
  -3   0  12    2.70    0.69
   3   0 -12    1.89    0.57
   3   0 -12    1.82    0.65
  -2   1   9    2.12    0.51
  -2   1   9    3.02    0.39
   2  -1  -9    1.90    0.47
   2  -1  -9    2.86    0.62
  -1   2   6   -0.13    0.23
   1  -2  -6    0.20    0.31
   1  -2  -6    0.03    0.22
   0   3   3    7.73    0.64
   0  -3  -3    8.51    0.70
   0  -3  -3    7.37    0.56
   0  -3  -3    7.83    0.56
   1   4   0    5.64    0.61
   1   4   0    5.28    0.49
  -1  -4   0    6.17    0.55
   2   5  -3    1.00    0.39
   2   5  -3    1.31    0.30
  -2  -5   3    0.90    0.27
  -2  -5   3    1.88    0.39
  -2  -5   3    0.74    0.18
  -2  -5   3    1.39    0.21
   3   6  -6    4.43    0.62
   3   6  -6    3.01    0.62
  -3  -6   6    2.93    0.48
  -3  -6   6    3.24    0.63
  -3  -6   6    3.46    0.43
   4   7  -9    1.81    0.66
   4   7  -9    3.03    0.68
  -4  -7   9    2.52    0.54
  -4  -7   9    1.61    0.42
  -4  -7   9    2.01    0.64
  -2   0  11    0.63    0.47
   2   0 -11    0.38    0.54
   2   0 -11   -0.30    0.34
  -1   1   8    2.89    0.51
  -1   1   8    3.86    0.39
   1  -1  -8    2.49    0.57
   1  -1  -8    2.79    0.47
   1  -1  -8    3.23    0.33
   0   2   5    0.20    0.20
   0  -2  -5    0.28    0.18
   0  -2  -5    0.11    0.17
   0  -2  -5   -0.23    0.25
   0  -2  -5    0.05    0.14
  -1  -3  -2    4.87    0.46
  -1  -3  -2    4.57    0.46
   2   4  -1    5.50    0.56
   2   4  -1    5.01    0.43
  -2  -4   1    3.02    0.43
  -2  -4   1    4.40    0.47
   3   5  -4   -0.30    0.34
   3   5  -4   -0.40    0.25
  -3  -5   4    0.04    0.13
  -3  -5   4    0.52    0.34
  -3  -5   4    0.06    0.13
  -3  -5   4    0.09    0.21
   4   6  -7    0.66    0.46
   4   6  -7    0.63    0.43
  -4  -6   7   -0.27    0.38
  -4  -6   7   -0.16    0.28
  -4  -6   7    0.11    0.23
   5   7 -10    0.23    0.56
   5   7 -10    0.93    0.64
  -5  -7  10    1.31    0.38
  -5  -7  10    0.16    0.55
  -5  -7  10    1.06    0.54
  -2  -1  13    0.08    0.56
   2   1 -13   -0.29    0.42
   2   1 -13    0.51    0.56
  -1   0  10    1.27    0.47
   1   0 -10   -0.07    0.43
   1   0 -10    0.46    0.28
   1   0 -10    0.57    0.35
   1   0 -10    0.69    0.33
   0   1   7    0.13    0.23
   0  -1  -7    0.09    0.19
   0  -1  -7    0.16    0.34
   0  -1  -7   -0.15    0.23
  -1  -2  -4   36.56    2.46
  -1  -2  -4   35.81    2.44
   2   3   1    2.11    0.34
  -2  -3  -1    2.13    0.25
  -2  -3  -1    1.94    0.24
   3   4  -2    1.09    0.37
   3   4  -2    1.24    0.27
  -3  -4   2    1.25    0.30
  -3  -4   2    1.62    0.25
   4   5  -5    5.96    0.68
   4   5  -5    5.30    0.78
  -4  -5   5    5.37    0.57
  -4  -5   5    5.13    0.71
   5   6  -8    2.08    0.63
   5   6  -8    2.21    0.66
  -5  -6   8    2.17    0.34
  -5  -6   8    1.80    0.60
  -5  -6   8    2.02    0.48
  -1  -1  12   -0.45    0.44
   1   1 -12    0.02    0.35
   1   1 -12   -0.23    0.47
   0   0   9   19.74    1.50
   0   0  -9   16.97    1.33
   0   0  -9   19.20    1.32
   0   0  -9   16.82    1.22
   0   0  -9   17.18    1.51
  -1  -1  -6   15.22    1.23
  -1  -1  -6   15.65    1.15
   2   2   3    8.31    0.65
  -2  -2  -3    8.36    0.65
  -2  -2  -3    8.73    0.77
  -2  -2  -3    9.28    0.65
   3   3   0   17.96    1.26
  -3  -3   0   15.66    1.13
   4   4  -3    2.04    0.34
   4   4  -3    1.96    0.47
  -4  -4   3    1.51    0.38
  -4  -4   3    1.43    0.27
   5   5  -6    2.17    0.61
   5   5  -6    2.31    0.50
  -5  -5   6    1.98    0.56
  -5  -5   6    3.26    0.42
   6   6  -9    1.25    0.63
   6   6  -9    0.27    0.59
  -6  -6   9    1.46    0.42
  -6  -6   9    0.42    0.52
   0  -1  11    1.09    0.52
   0   1 -11    0.41    0.34
   0   1 -11    0.08    0.47
   0   1 -11    0.91    0.33
   1   0   8    4.94    0.65
  -1   0  -8    4.00    0.42
  -1   0  -8    4.14    0.52
  -1   0  -8    3.73    0.62
  -2  -1  -5    2.52    0.36
  -2  -1  -5    3.45    0.45
  -2  -1  -5    2.66    0.38
   3   2   2    4.70    0.48
  -3  -2  -2    5.37    0.60
   4   3  -1    3.15    0.51
  -4  -3   1    3.85    0.39
  -4  -3   1    3.46    0.39
   5   4  -4    0.55    0.43
   5   4  -4    0.46    0.31
  -5  -4   4    1.21    0.39
  -5  -4   4    1.23    0.23
   6   5  -7   -0.32    0.45
   6   5  -7    0.05    0.45
  -6  -5   7    0.47    0.44
   0  -2  13   -0.52    0.45
   0   2 -13    0.71    0.52
   0   2 -13   -0.51    0.34
   1  -1  10   59.21    4.16
  -1   1 -10   58.13    4.23
  -1   1 -10   61.62    4.05
  -1   1 -10   60.06    3.98
   2   0   7    2.10    0.42
  -2   0  -7    1.76    0.43
  -2   0  -7    2.22    0.41
   3   1   4    6.13    0.43
   3   1   4    6.02    0.52
  -3  -1  -4    4.97    0.47
  -3  -1  -4    6.58    0.63
  -3  -1  -4    4.56    0.45
  -4  -2  -1   67.93    4.53
  -4  -2  -1   66.93    4.50
   5   3  -2   19.23    1.39
   5   3  -2   19.25    1.56
  -5  -3   2   20.06    1.45
  -5  -3   2   20.33    1.44
  -5  -3   2   20.50    1.56
   6   4  -5    0.11    0.40
  -6  -4   5    0.10    0.35
   7   5  -8    0.69    0.65
  -7  -5   8    2.67    0.67
   1  -2  12   -0.07    0.47
  -1   2 -12    0.69    0.49
  -1   2 -12    0.65    0.33
  -1   2 -12   -0.40    0.33
   2  -1   9   58.01    3.95
  -2   1  -9   56.27    4.00
  -2   1  -9   57.56    3.89
   3   0   6    1.60    0.35
  -3   0  -6    1.25    0.36
  -3   0  -6    0.86    0.30
   4   1   3    1.47    0.23
  -4  -1  -3    2.01    0.45
  -4  -1  -3    1.57    0.36
  -5  -2   0    0.95    0.39
  -5  -2   0    0.53    0.34
  -5  -2   0    0.94    0.19
  -5  -2   0    0.66    0.17
  -6  -3   3   -0.14    0.38
  -6  -3   3    0.06    0.27
   7   4  -6   18.21    1.69
  -7  -4   6   21.27    1.70
  -7  -4   6   17.60    1.61
   2  -2  11   10.97    1.06
  -2   2 -11    9.43    0.98
  -2   2 -11    9.42    1.15
  -2   2 -11    9.37    0.79
   3  -1   8   30.39    2.17
  -3   1  -8   27.83    2.21
  -3   1  -8   31.98    2.20
   4   0   5    7.22    0.64
  -4   0  -5    6.81    0.62
  -4   0  -5    7.34    0.78
  -4   0  -5    7.11    0.61
  -5  -1  -2    0.07    0.32
  -5  -1  -2    0.33    0.28
  -6  -2   1    4.08    0.68
  -6  -2   1    5.87    0.58
  -6  -2   1    6.38    0.83
  -6  -2   1    6.58    0.60
  -7  -3   4   12.99    1.21
  -7  -3   4   14.51    1.31
   8   4  -7    0.60    0.53
  -8  -4   7    1.69    0.60
  -8  -4   7    0.75    0.52
   2  -3  13    7.95    1.02
  -2   3 -13    7.60    0.88
  -2   3 -13    4.15    0.92
  -2   3 -13    6.81    0.69
   3  -2  10    0.20    0.38
  -3   2 -10    0.11    0.36
  -3   2 -10    0.25    0.38
   4  -1   7    7.68    0.79
  -4   1  -7    7.89    0.87
  -4   1  -7    7.37    0.79
   5   0   4   36.09    2.38
  -5   0  -4   35.09    2.36
  -5   0  -4   32.97    2.35
  -5   0  -4   38.66    2.55
  -5   0  -4   36.68    2.45
  -6  -1  -1    4.97    0.65
  -6  -1  -1    5.68    0.45
  -6  -1  -1    4.92    0.43
  -6  -1  -1    5.72    0.77
  -7  -2   2    1.63    0.48
  -7  -2   2    0.33    0.30
  -8  -3   5    1.21    0.59
  -8  -3   5    0.36    0.41
   3  -3  12   -0.22    0.40
  -3   3 -12    0.00    0.40
  -3   3 -12   -0.16    0.41
   4  -2   9   -0.06    0.36
  -4   2  -9    0.03    0.34
  -4   2  -9   -0.17    0.36
   5  -1   6    3.70    0.49
  -5   1  -6    3.99    0.62
  -5   1  -6    3.93    0.63
  -5   1  -6    3.94    0.47
  -5   1  -6    3.23    0.47
   6   0   3    8.28    0.60
  -6   0  -3    7.33    0.60
  -6   0  -3    7.76    0.78
  -6   0  -3    7.94    0.60
  -6   0  -3    8.91    0.97
  -7  -1   0   55.94    3.82
  -7  -1   0   50.75    3.61
  -7  -1   0   56.46    3.62
  -7  -1   0   55.14    3.76
  -8  -2   3   10.56    1.03
  -8  -2   3   10.71    1.17
  -9  -3   6    2.06    0.58
  -9  -3   6    1.47    0.61
   4  -3  11   -0.24    0.40
  -4   3 -11   -0.08    0.39
  -4   3 -11   -0.02    0.41
   5  -2   8    0.25    0.33
  -5   2  -8    1.11    0.45
  -5   2  -8    0.38    0.33
   6  -1   5    0.51    0.24
  -6   1  -5    0.06    0.26
  -6   1  -5    0.12    0.21
  -6   1  -5   -0.13    0.21
  -6   1  -5    0.75    0.43
  -7   0  -2    4.20    0.47
  -7   0  -2    4.28    0.45
  -7   0  -2    5.86    0.78
  -7   0  -2    4.29    0.64
  -8  -1   1   29.79    2.05
  -8  -1   1   23.76    1.89
  -9  -2   4    2.46    0.59
  -9  -2   4    3.77    0.76
   5  -3  10   -0.23    0.36
  -5   3 -10   -0.02    0.39
  -5   3 -10   -0.33    0.38
   6  -2   7    5.42    0.66
  -6   2  -7    5.63    0.68
  -6   2  -7    5.58    0.60
  -6   2  -7    6.38    0.82
   7  -1   4    5.01    0.46
  -7   1  -4    3.87    0.68
  -7   1  -4    4.79    0.53
  -7   1  -4    5.17    0.64
  -8   0  -1   14.24    1.30
  -8   0  -1   15.22    1.17
  -8   0  -1   16.06    1.43
  -9  -1   2    7.55    1.02
  -9  -1   2    5.31    0.72
  -9  -1   2    5.73    0.87
   5  -4  12   -0.75    0.39
  -5   4 -12   -0.08    0.42
  -5   4 -12   -0.20    0.42
   6  -3   9    5.41    0.72
  -6   3  -9    4.14    0.70
  -6   3  -9    6.48    0.88
   7  -2   6    1.80    0.38
  -7   2  -6    2.82    0.58
  -7   2  -6    2.23    0.43
  -7   2  -6    1.95    0.43
  -8   1  -3    0.57    0.52
  -8   1  -3    0.08    0.36
  -8   1  -3   -0.03    0.26
  -8   1  -3   -0.04    0.23
  -9   0   0    4.36    0.71
  -9   0   0    2.74    0.51
  -9   0   0    4.14    0.76
 -10  -1   3    4.21    0.70
 -10  -1   3    4.10    0.80
   6  -4  11   -0.16    0.43
  -6   4 -11    1.02    0.49
  -6   4 -11    0.57    0.50
   7  -3   8   -0.14    0.29
  -7   3  -8   -0.48    0.32
  -7   3  -8    0.51    0.49
  -8   2  -5   -0.36    0.41
  -8   2  -5   -0.24    0.33
  -8   2  -5   -0.18    0.26
  -9   1  -2    1.25    0.58
  -9   1  -2    1.28    0.37
  -9   1  -2    1.66    0.51
 -10   0   1    1.00    0.44
 -10   0   1    2.04    0.64
 -10   0   1    1.04    0.57
   7  -4  10    3.61    0.64
  -7   4 -10    2.38    0.67
  -7   4 -10    2.98    0.65
   8  -3   7   13.26    1.10
  -8   3  -7   13.67    1.35
  -8   3  -7   13.46    1.12
  -8   3  -7   11.49    1.17
  -9   2  -4    2.11    0.46
  -9   2  -4    2.69    0.60
  -9   2  -4    2.09    0.61
 -10   1  -1    1.55    0.56
 -10   1  -1    0.29    0.56
 -10   1  -1    0.32    0.36
   8  -4   9    1.74    0.48
  -8   4  -9    0.97    0.49
  -8   4  -9    1.32    0.60
  -9   3  -6    1.62    0.48
  -9   3  -6    0.95    0.41
  -9   3  -6    1.15    0.55
 -10   2  -3    1.08    0.49
 -10   2  -3    0.28    0.58
 -10   2  -3    0.29    0.35
 -11   1   0    0.11    0.52
 -11   1   0    0.45    0.57
 -11   1   0   -0.23    0.36
  -9   4  -8    0.24    0.51
  -9   4  -8    0.35    0.40
 -10   3  -5   -0.18    0.35
 -10   3  -5    0.21    0.47
 -10   3  -5   -0.94    0.36
 -11   2  -2    1.42    0.58
 -11   2  -2    1.12    0.45
 -11   2  -2    0.70    0.58
  -9  10  -1    0.40    0.57
  -9  10  -1    2.90    0.70
  -9  10  -1    0.87    0.68
   9 -10   1    2.29    0.63
  -8  11  -4    0.03    0.48
  -8  11  -4    0.24    0.61
   8 -11   4    1.56    0.60
  -9   9   1    0.17    0.52
  -9   9   1    0.04    0.53
   9  -9  -1   -0.35    0.48
  -8  10  -2    1.52    0.63
  -8  10  -2    1.89    0.71
   8 -10   2    1.37    0.58
  -7  11  -5    0.56    0.65
  -7  11  -5    2.36    0.66
   7 -11   5    1.86    0.61
  -9   8   3    5.21    0.98
  -9   8   3    8.80    1.05
   9  -8  -3    8.29    1.05
  -8   9   0    2.33    0.64
  -8   9   0    2.21    0.63
  -8   9   0    1.97    0.77
   8  -9   0    2.17    0.63
   8  -9   0    1.32    0.61
  -7  10  -3    1.65    0.68
  -7  10  -3    0.62    0.52
   7 -10   3    1.77    0.62
   7 -10   3    1.12    0.54
  -6  11  -6    0.57    0.67
  -6  11  -6   -0.27    0.46
   6 -11   6    0.20    0.54
   6 -11   6    0.74    0.50
   6 -11   6    0.85    0.53
  -9   7   5    0.70    0.60
  -9   7   5    0.85    0.59
   9  -7  -5    0.35    0.53
  -8   8   2    0.03    0.50
  -8   8   2    0.06    0.46
   8  -8  -2   -0.08    0.45
   8  -8  -2    0.23    0.46
  -7   9  -1    0.59    0.48
  -7   9  -1    0.65    0.54
   7  -9   1    0.05    0.43
   7  -9   1    1.04    0.51
  -6  10  -4    1.64    0.57
  -6  10  -4    1.51    0.67
   6 -10   4    1.74    0.62
   6 -10   4    2.10    0.56
  -5  11  -7    6.01    0.86
  -5  11  -7    4.41    0.87
  -5  11  -7    5.52    0.99
   5 -11   7    4.34    0.82
   5 -11   7    3.83    0.84
   5 -11   7    5.70    0.79
  -8   7   4    9.01    1.08
  -8   7   4    6.39    1.04
   8  -7  -4    6.32    1.00
   8  -7  -4    8.89    1.03
  -7   8   1    0.38    0.44
  -7   8   1   -0.38    0.52
  -7   8   1   -0.03    0.38
   7  -8  -1    0.33    0.42
   7  -8  -1    0.28    0.47
  -6   9  -2    3.56    0.76
  -6   9  -2    2.40    0.63
   6  -9   2    3.23    0.70
   6  -9   2    3.14    0.63
  -5  10  -5   -0.36    0.41
  -5  10  -5    0.27    0.53
   5 -10   5    0.24    0.42
   5 -10   5    0.67    0.48
   5 -10   5    0.00    0.44
  -4  11  -8    1.17    0.66
  -4  11  -8    1.91    0.65
  -4  11  -8    0.61    0.60
   4 -11   8    0.23    0.54
   4 -11   8    0.99    0.57
   4 -11   8    0.24    0.47
  -8   6   6    0.02    0.46
  -8   6   6    0.52    0.56
   8  -6  -6   -0.11    0.44
   8  -6  -6   -0.09    0.48
  -7   7   3    0.52    0.47
   7  -7  -3   -0.23    0.39
   7  -7  -3    0.45    0.46
  -6   8   0    9.19    1.01
  -6   8   0    3.70    0.74
   6  -8   0    7.26    0.82
   6  -8   0    5.36    0.83
  -5   9  -3    1.45    0.58
  -5   9  -3    0.58    0.45
   5  -9   3    1.97    0.57
   5  -9   3    2.08    0.51
  -4  10  -6   -0.14    0.49
  -4  10  -6   -0.18    0.43
  -4  10  -6    0.12    0.46
   4 -10   6   -0.32    0.40
   4 -10   6    0.32    0.43
   4 -10   6   -0.01    0.38
  -3  11  -9    1.85    0.68
  -3  11  -9    2.47    0.78
   3 -11   9    1.42    0.65
   3 -11   9    1.37    0.54
   3 -11   9    1.74    0.64
  -8   5   8    0.23    0.52
  -8   5   8    0.09    0.48
   8  -5  -8   -0.24    0.48
   8  -5  -8    0.09    0.49
  -7   6   5    1.24    0.52
  -7   6   5    1.29    0.57
   7  -6  -5    0.83    0.51
   7  -6  -5    1.01    0.53
  -6   7   2   58.23    4.24
  -6   7   2   59.44    4.23
   6  -7  -2   64.39    4.17
   6  -7  -2   58.81    4.23
  -5   8  -1    0.54    0.50
  -5   8  -1    0.82    0.45
   5  -8   1    0.77    0.41
   5  -8   1    0.76    0.45
  -4   9  -4   -0.02    0.50
  -4   9  -4    0.47    0.42
  -4   9  -4   -0.20    0.34
   4  -9   4    0.49    0.43
   4  -9   4   -0.54    0.34
   4  -9   4    0.03    0.40
  -3  10  -7    4.15    0.83
  -3  10  -7    5.27    0.85
  -3  10  -7    5.40    0.84
  -3  10  -7    5.22    0.81
   3 -10   7    4.45    0.78
   3 -10   7    4.43    0.83
   3 -10   7    2.95    0.64
  -7   5   7    4.11    0.79
  -7   5   7    4.12    0.76
   7  -5  -7    4.40    0.84
   7  -5  -7    4.42    0.74
  -6   6   4    7.70    0.99
   6  -6  -4    5.27    0.89
   6  -6  -4    9.69    0.93
  -5   7   1   -0.23    0.41
  -5   7   1    0.14    0.37
   5  -7  -1    0.02    0.40
   5  -7  -1    0.03    0.36
  -4   8  -2    7.22    0.88
  -4   8  -2    9.15    1.03
   4  -8   2    8.36    0.85
   4  -8   2    5.97    0.86
  -3   9  -5    7.81    1.02
  -3   9  -5   10.18    1.02
  -3   9  -5    6.70    0.95
   3  -9   5    6.55    0.96
   3  -9   5    9.45    0.97
   3  -9   5    9.39    0.92
  -2  10  -8    1.01    0.72
  -2  10  -8    3.66    0.71
  -2  10  -8    4.00    0.97
  -2  10  -8    3.81    0.80
   2 -10   8    4.77    0.84
   2 -10   8    2.94    0.61
   2 -10   8    4.18    0.73
  -7   4   9    5.27    0.76
  -7   4   9    3.40    0.82
   7  -4  -9    3.84    0.84
   7  -4  -9    4.89    0.81
  -6   5   6    3.49    0.65
  -6   5   6    3.37    0.69
   6  -5  -6    3.39    0.68
   6  -5  -6    3.92    0.65
  -5   6   3   16.47    1.21
  -5   6   3   16.90    1.44
   5  -6  -3   16.21    1.46
   5  -6  -3   16.94    1.37
  -4   7   0    0.03    0.34
  -4   7   0    0.72    0.46
   4  -7   0    0.31    0.35
   4  -7   0    0.73    0.42
  -3   8  -3    0.22    0.35
  -3   8  -3    0.86    0.42
  -3   8  -3    0.25    0.46
   3  -8   3    0.04    0.38
   3  -8   3   -0.08    0.33
   3  -8   3    0.04    0.36
  -2   9  -6    1.86    0.53
  -2   9  -6    1.85    0.52
  -2   9  -6    1.05    0.47
  -2   9  -6    0.86    0.50
   2  -9   6    1.55    0.44
   2  -9   6    0.80    0.46
   2  -9   6    0.91    0.52
  -1  10  -9    4.81    0.96
  -1  10  -9    6.91    0.95
   1 -10   9    6.20    0.83
   1 -10   9    8.20    1.14
   1 -10   9    7.76    0.97
  -6   4   8    1.94    0.59
  -6   4   8    2.46    0.59
   6  -4  -8    1.91    0.56
   6  -4  -8    1.15    0.59
  -5   5   5    0.60    0.40
   5  -5  -5    0.09    0.40
   5  -5  -5    0.05    0.36
  -4   6   2   -0.15    0.36
  -4   6   2    0.84    0.39
   4  -6  -2    0.03    0.32
   4  -6  -2    0.35    0.39
  -3   7  -1   -0.22    0.36
  -3   7  -1   -0.20    0.31
  -3   7  -1    0.38    0.34
   3  -7   1    0.68    0.37
   3  -7   1   -0.37    0.27
  -2   8  -4    0.27    0.46
  -2   8  -4    1.01    0.42
  -2   8  -4    1.00    0.43
   2  -8   4    0.97    0.36
   2  -8   4    0.85    0.46
   2  -8   4    1.28    0.45
  -1   9  -7   -0.61    0.34
  -1   9  -7    0.52    0.48
  -1   9  -7    0.32    0.44
  -1   9  -7    0.23    0.45
   1  -9   7   -0.12    0.39
   1  -9   7   -0.13    0.44
   1  -9   7    0.73    0.38
   0  10 -10    5.09    0.85
   0  10 -10    3.00    0.79
   0 -10  10    2.23    0.75
   0 -10  10    3.09    0.62
   0 -10  10    4.17    0.74
  -6   3  10   -0.07    0.48
  -6   3  10   -0.46    0.41
   6  -3 -10   -0.27    0.40
   6  -3 -10   -0.22    0.46
  -5   4   7    6.07    0.74
  -5   4   7    4.16    0.71
   5  -4  -7    4.24    0.78
   5  -4  -7    4.44    0.65
  -4   5   4   10.28    1.01
   4  -5  -4   10.93    1.08
   4  -5  -4   11.28    0.99
  -3   6   1    5.44    0.74
  -3   6   1    5.68    0.69
   3  -6  -1    6.04    0.66
   3  -6  -1    7.30    0.81
  -2   7  -2   -0.02    0.35
  -2   7  -2   -0.05    0.28
  -2   7  -2   -0.16    0.30
   2  -7   2   -0.16    0.32
   2  -7   2   -0.05    0.29
  -1   8  -5    4.11    0.62
  -1   8  -5    3.12    0.59
  -1   8  -5    3.93    0.72
   1  -8   5    3.66    0.69
   1  -8   5    4.48    0.57
   1  -8   5    4.07    0.62
   0   9  -8    1.59    0.59
   0   9  -8    1.91    0.62
   0  -9   8    1.47    0.47
   0  -9   8    1.24    0.60
   0  -9   8    1.63    0.53
  -5   3   9    0.79    0.49
  -5   3   9    1.27    0.47
   5  -3  -9    0.73    0.54
   5  -3  -9    0.75    0.47
  -4   4   6   -0.57    0.29
   4  -4  -6    0.23    0.37
   4  -4  -6    0.47    0.37
  -3   5   3    1.87    0.41
  -3   5   3    0.62    0.34
   3  -5  -3    2.23    0.40
   3  -5  -3    1.66    0.44
  -2   6   0    7.76    0.84
  -2   6   0    7.91    0.78
  -2   6   0    7.53    0.75
   2  -6   0    8.28    0.73
   2  -6   0    7.39    0.79
  -1   7  -3   12.40    1.07
  -1   7  -3   11.86    1.06
  -1   7  -3   13.08    1.20
   1  -7   3   11.98    1.02
   1  -7   3   13.40    1.10
   1  -7   3   12.71    1.13
   0   8  -6    0.08    0.41
   0   8  -6    0.31    0.35
   0   8  -6    0.59    0.39
   0   8  -6    0.30    0.44
   0  -8   6    0.51    0.47
   0  -8   6   -0.50    0.30
   0  -8   6   -0.13    0.32
   1   9  -9    5.17    0.88
   1   9  -9    5.63    0.94
  -1  -9   9    5.75    0.72
  -1  -9   9    5.95    0.81
  -1  -9   9    3.28    0.85
   5  -2 -11    0.81    0.51
   5  -2 -11    1.56    0.62
  -4   3   8    1.37    0.44
  -4   3   8    0.34    0.40
   4  -3  -8    0.72    0.50
   4  -3  -8    1.23    0.44
  -3   4   5    0.15    0.29
   3  -4  -5   -0.25    0.28
   3  -4  -5    0.49    0.40
  -2   5   2    3.54    0.49
  -2   5   2    3.63    0.52
   2  -5  -2    2.93    0.49
   2  -5  -2    3.50    0.43
  -1   6  -1   78.30    5.15
  -1   6  -1   80.52    5.09
  -1   6  -1   76.36    5.09
   1  -6   1   74.70    5.14
   1  -6   1   74.29    5.04
   0   7  -4    0.88    0.37
   0   7  -4    1.82    0.42
   0   7  -4    1.91    0.51
   0  -7   4    1.92    0.45
   0  -7   4    1.49    0.34
   0  -7   4    1.12    0.44
   1   8  -7    1.74    0.58
   1   8  -7    1.91    0.53
  -1  -8   7    0.67    0.52
  -1  -8   7    0.80    0.39
  -1  -8   7    1.20    0.39
   2   9 -10   -0.16    0.55
   2   9 -10    0.10    0.61
  -2  -9  10    0.20    0.52
  -2  -9  10   -0.11    0.48
  -2  -9  10    0.66    0.41
  -4   2  10   -0.04    0.46
   4  -2 -10    0.40    0.50
   4  -2 -10   -0.11    0.37
  -3   3   7    1.38    0.43
   3  -3  -7    1.34    0.41
   3  -3  -7    1.77    0.52
  -2   4   4   51.80    3.53
  -2   4   4   51.42    3.50
   2  -4  -4   53.97    3.49
   2  -4  -4   51.06    3.58
  -1   5   1   17.42    1.15
  -1   5   1   14.56    1.17
  -1   5   1   13.34    1.12
   1  -5  -1   15.90    1.19
   1  -5  -1   13.72    1.07
   0   6  -2    4.65    0.51
   0   6  -2    4.23    0.61
   0   6  -2    3.80    0.50
   0  -6   2    4.61    0.59
   0  -6   2    4.14    0.45
   0  -6   2    4.47    0.54
   1   7  -5    0.89    0.35
   1   7  -5    0.01    0.41
   1   7  -5   -0.16    0.34
   1   7  -5    0.28    0.30
  -1  -7   5    0.11    0.38
  -1  -7   5   -0.13    0.29
  -1  -7   5   -0.31    0.25
   2   8  -8    1.06    0.56
   2   8  -8    1.69    0.56
  -2  -8   8    1.32    0.40
  -2  -8   8    0.95    0.54
  -2  -8   8    1.71    0.50
  -4   1  12   -0.13    0.51
   4  -1 -12   -0.19    0.41
   4  -1 -12    0.39    0.59
  -3   2   9    4.60    0.75
  -3   2   9    7.02    0.67
   3  -2  -9    5.12    0.83
   3  -2  -9    5.59    0.72
  -2   3   6   13.45    1.09
   2  -3  -6   12.46    1.03
   2  -3  -6   12.53    1.16
  -1   4   3   69.55    4.61
  -1   4   3   66.78    4.60
   1  -4  -3   71.34    4.56
   1  -4  -3   71.30    4.66
   0   5   0    0.21    0.23
   0   5   0    0.19    0.27
   0  -5   0    0.23    0.16
   0  -5   0    0.24    0.16
   0  -5   0    0.29    0.26
   1   6  -3    4.86    0.53
   1   6  -3    4.51    0.55
   1   6  -3    4.96    0.69
  -1  -6   3    4.21    0.46
  -1  -6   3    4.46    0.62
  -1  -6   3    4.88    0.56
   2   7  -6   -0.65    0.38
   2   7  -6    0.00    0.37
  -2  -7   6    0.56    0.40
  -2  -7   6    0.57    0.34
  -2  -7   6    0.30    0.28
   3   8  -9    1.24    0.62
   3   8  -9    2.67    0.69
  -3  -8   9    2.45    0.66
  -3  -8   9    2.48    0.58
  -3  -8   9    1.72    0.42
   3  -1 -11    3.21    0.62
   3  -1 -11    3.61    0.78
  -2   2   8    1.18    0.39
  -2   2   8    0.77    0.35
   2  -2  -8    1.04    0.37
   2  -2  -8    1.24    0.50
  -1   3   5   15.72    1.21
   1  -3  -5   14.64    1.29
   1  -3  -5   16.81    1.16
   0   4   2    6.69    0.63
   0   4   2    7.41    0.67
   0  -4  -2    7.82    0.67
   0  -4  -2    7.41    0.52
   1   5  -1    0.00    0.20
   1   5  -1    0.30    0.30
  -1  -5   1    0.43    0.27
   2   6  -4    1.55    0.39
   2   6  -4    1.15    0.46
  -2  -6   4    1.44    0.42
  -2  -6   4    1.58    0.27
  -2  -6   4    1.79    0.35
  -2  -6   4    1.57    0.27
   3   7  -7    6.26    0.95
   3   7  -7    6.88    0.87
  -3  -7   7    6.54    0.67
  -3  -7   7    7.00    0.77
   4   8 -10    0.64    0.62
   4   8 -10    0.25    0.57
  -4  -8  10   -0.45    0.45
  -4  -8  10    0.00    0.57
  -4  -8  10   -0.14    0.31
  -3   0  13   -0.52    0.49
   3   0 -13    0.45    0.48
   3   0 -13   -0.09    0.52
   2  -1 -10    1.52    0.55
   2  -1 -10    1.86    0.46
  -1   2   7    0.10    0.27
   1  -2  -7   -0.26    0.33
   1  -2  -7    0.60    0.28
   0   3   4    5.26    0.49
   0  -3  -4    5.51    0.59
   0  -3  -4    5.21    0.41
   0  -3  -4    5.63    0.42
   1   4   1   12.14    0.97
   1   4   1   11.98    0.90
  -1  -4  -1   12.96    0.95
   2   5  -2    4.12    0.51
   2   5  -2    4.92    0.65
  -2  -5   2    6.04    0.59
  -2  -5   2    5.61    0.53
   3   6  -5    2.72    0.61
   3   6  -5    3.29    0.55
  -3  -6   5    2.96    0.58
  -3  -6   5    3.40    0.36
  -3  -6   5    3.89    0.49
   4   7  -8    1.03    0.58
   4   7  -8    1.94    0.57
  -4  -7   8    1.25    0.44
  -4  -7   8    1.35    0.33
  -4  -7   8    0.93    0.52
  -2   0  12    0.15    0.50
   2   0 -12    0.62    0.41
   2   0 -12    0.67    0.55
   1  -1  -9    1.58    0.37
   1  -1  -9    1.58    0.52
   1  -1  -9    0.88    0.26
   1  -1  -9    1.07    0.26
   0  -2  -6   24.73    1.74
   0  -2  -6   26.16    1.75
   0  -2  -6   26.94    1.91
   0  -2  -6   26.13    1.76
   1   3   3    0.16    0.17
  -1  -3  -3    0.24    0.19
  -1  -3  -3    0.28    0.21
   2   4   0    0.06    0.24
   2   4   0   -0.07    0.16
  -2  -4   0    0.21    0.18
  -2  -4   0   -0.23    0.16
   3   5  -3    1.68    0.48
   3   5  -3    2.21    0.39
  -3  -5   3    3.00    0.47
  -3  -5   3    2.77    0.37
   4   6  -6    1.85    0.49
   4   6  -6    1.96    0.60
  -4  -6   6    1.00    0.47
  -4  -6   6    2.82    0.43
  -4  -6   6    1.98    0.25
   5   7  -9    0.61    0.59
   5   7  -9    0.44    0.59
  -5  -7   9    0.28    0.53
  -5  -7   9    0.33    0.25
  -1   0  11    0.88    0.50
   1   0 -11    0.02    0.34
   1   0 -11    1.22    0.55
   0  -1  -8    1.05    0.28
   0  -1  -8   -0.07    0.40
   0  -1  -8    0.78    0.24
  -1  -2  -5    6.86    0.69
  -1  -2  -5    7.18    0.64
   2   3   2   15.57    1.15
  -2  -3  -2   16.69    1.10
  -2  -3  -2   15.08    1.10
   3   4  -1   24.21    1.58
  -3  -4   1   17.99    1.43
  -3  -4   1   20.59    1.45
   4   5  -4    3.85    0.66
   4   5  -4    3.43    0.51
  -4  -5   4    3.19    0.55
  -4  -5   4    3.51    0.41
   5   6  -7    0.60    0.45
   5   6  -7    0.76    0.51
  -5  -6   7    0.25    0.44
  -5  -6   7   -0.07    0.30
  -1  -1  13   -0.39    0.46
   1   1 -13    0.12    0.38
   1   1 -13    0.11    0.54
   0   0  10    7.97    0.95
   0   0 -10    8.59    0.74
   0   0 -10    6.63    0.73
   0   0 -10    8.23    1.04
  -1  -1  -7   26.32    1.95
  -1  -1  -7   25.70    1.82
  -2  -2  -4    2.41    0.39
  -2  -2  -4    2.98    0.34
  -2  -2  -4    2.34    0.33
   3   3   1    0.87    0.27
  -3  -3  -1    0.47    0.13
  -3  -3  -1    0.64    0.13
   4   4  -2    0.18    0.32
   4   4  -2    0.18    0.20
  -4  -4   2    0.15    0.21
  -4  -4   2    0.13    0.25
   5   5  -5    0.46    0.43
   5   5  -5    0.17    0.30
  -5  -5   5    0.19    0.37
  -5  -5   5    0.20    0.22
   6   6  -8    0.44    0.53
  -6  -6   8   -0.58    0.42
   0  -1  12   -0.05    0.44
   0   1 -12    0.45    0.53
   0   1 -12   -0.18    0.29
   1   0   9    0.42    0.39
  -1   0  -9    0.37    0.41
  -1   0  -9   -0.02    0.19
  -1   0  -9    0.00    0.27
  -2  -1  -6    1.70    0.36
  -2  -1  -6    1.95    0.39
   3   2   3    2.75    0.33
  -3  -2  -3    2.92    0.27
  -3  -2  -3    3.01    0.26
  -3  -2  -3    2.03    0.43
   4   3   0   -0.04    0.26
  -4  -3   0   -0.20    0.13
  -4  -3   0   -0.08    0.12
   5   4  -3    8.02    0.84
   5   4  -3    8.52    0.94
  -5  -4   3    7.55    0.78
   6   5  -6    0.24    0.47
  -6  -5   6   -0.62    0.34
   1  -1  11    2.50    0.60
  -1   1 -11    2.91    0.71
  -1   1 -11    2.91    0.41
  -1   1 -11    1.91    0.44
   2   0   8   98.72    6.64
  -2   0  -8  101.97    6.61
  -2   0  -8   99.71    6.68
   3   1   5    0.22    0.21
  -3  -1  -5   -0.09    0.17
  -3  -1  -5    0.09    0.28
  -3  -1  -5   -0.02    0.20
   4   2   2    4.32    0.38
   4   2   2    4.63    0.50
  -4  -2  -2    6.02    0.67
   5   3  -1    1.06    0.39
  -5  -3   1    1.59    0.29
  -5  -3   1    1.64    0.47
  -5  -3   1    1.73    0.29
   6   4  -4    6.83    0.86
  -6  -4   4    5.48    0.73
   7   5  -7    0.59    0.58
  -7  -5   7    0.18    0.46
   1  -2  13    0.65    0.53
  -1   2 -13    1.30    0.61
  -1   2 -13    1.58    0.38
   2  -1  10   -0.53    0.35
  -2   1 -10   -0.29    0.40
  -2   1 -10    0.10    0.33
   3   0   7    3.28    0.50
  -3   0  -7    3.60    0.53
  -3   0  -7    2.39    0.47
   4   1   4   18.02    1.35
   4   1   4   18.08    1.38
  -4  -1  -4   17.59    1.52
  -4  -1  -4   21.29    1.34
  -4  -1  -4   21.37    1.32
  -5  -2  -1    8.01    0.89
  -5  -2  -1    7.91    0.80
  -6  -3   2   12.25    1.30
  -6  -3   2   17.00    1.21
   7   4  -5   -0.41    0.44
  -7  -4   5    0.25    0.48
  -7  -4   5    0.22    0.38
   2  -2  12    1.85    0.59
  -2   2 -12    1.96    0.51
  -2   2 -12    1.27    0.57
   3  -1   9    0.87    0.43
  -3   1  -9    0.18    0.35
  -3   1  -9    0.41    0.41
   4   0   6    5.60    0.59
  -4   0  -6    5.01    0.67
  -4   0  -6    4.90    0.54
  -4   0  -6    5.49    0.59
   5   1   3    0.61    0.16
  -5  -1  -3   -0.09    0.28
  -5  -1  -3    0.54    0.38
  -6  -2   0   15.47    1.19
  -6  -2   0   18.27    1.39
  -6  -2   0   16.75    1.20
  -6  -2   0   20.03    1.48
  -7  -3   3   18.01    1.52
  -7  -3   3   17.56    1.42
   8   4  -6    3.82    0.83
  -8  -4   6    4.90    0.87
  -8  -4   6    4.92    0.80
   3  -2  11    0.05    0.45
  -3   2 -11    0.66    0.41
  -3   2 -11    0.17    0.41
   4  -1   8   15.35    1.32
  -4   1  -8   16.68    1.36
  -4   1  -8   16.60    1.38
   5   0   5    0.78    0.25
  -5   0  -5    0.64    0.24
  -5   0  -5    0.44    0.20
  -5   0  -5    0.61    0.34
  -5   0  -5   -0.24    0.32
  -6  -1  -2    2.56    0.57
  -6  -1  -2    3.62    0.54
  -7  -2   1    0.39    0.46
  -7  -2   1    0.67    0.28
  -7  -2   1    1.69    0.46
  -8  -3   4    2.72    0.57
  -8  -3   4    1.98    0.66
   3  -3  13    0.53    0.50
  -3   3 -13    0.08    0.50
  -3   3 -13   -0.30    0.38
   4  -2  10    0.66    0.42
  -4   2 -10    0.95    0.46
  -4   2 -10    0.31    0.40
   5  -1   7    6.15    0.66
  -5   1  -7    4.97    0.73
  -5   1  -7    5.81    0.65
   6   0   4    0.63    0.21
  -6   0  -4    0.74    0.21
  -6   0  -4    0.33    0.42
  -6   0  -4    0.91    0.22
  -6   0  -4    0.66    0.33
  -7  -1  -1    4.25    0.64
  -7  -1  -1    3.18    0.39
  -7  -1  -1    4.41    0.73
  -7  -1  -1    4.62    0.44
  -8  -2   2    5.16    0.66
  -8  -2   2    5.72    0.80
  -9  -3   5    0.83    0.65
  -9  -3   5    0.92    0.49
   4  -3  12   -0.09    0.40
  -4   3 -12    0.21    0.45
  -4   3 -12    0.42    0.43
   5  -2   9    2.71    0.54
  -5   2  -9    2.14    0.52
  -5   2  -9    3.42    0.63
   6  -1   6   32.31    2.18
  -6   1  -6   29.11    2.18
  -6   1  -6   30.89    2.34
  -6   1  -6   32.67    2.19
  -7   0  -3    0.32    0.36
  -7   0  -3    0.68    0.22
  -7   0  -3    0.93    0.50
  -7   0  -3    1.50    0.25
  -8  -1   0   12.39    1.18
  -8  -1   0   11.23    0.99
  -8  -1   0   13.89    1.29
  -9  -2   3    1.82    0.52
  -9  -2   3    2.35    0.66
   5  -3  11    1.80    0.54
  -5   3 -11    0.48    0.48
  -5   3 -11    0.49    0.48
   6  -2   8    6.38    0.74
  -6   2  -8    5.09    0.82
  -6   2  -8    6.02    0.75
   7  -1   5   23.41    1.66
  -7   1  -5   24.16    1.91
  -7   1  -5   23.84    1.76
  -7   1  -5   23.43    1.69
  -8   0  -2    0.27    0.24
  -8   0  -2    0.32    0.38
  -8   0  -2    0.03    0.43
  -9  -1   1    2.36    0.63
  -9  -1   1    3.33    0.75
  -9  -1   1    3.94    0.56
 -10  -2   4    2.14    0.61
 -10  -2   4    3.66    0.79
   6  -3  10   -0.23    0.37
  -6   3 -10   -0.54    0.42
  -6   3 -10    0.02    0.37
   7  -2   7    4.43    0.58
  -7   2  -7    4.44    0.56
  -7   2  -7    3.63    0.56
  -7   2  -7    4.42    0.73
  -8   1  -4    0.58    0.38
  -8   1  -4    0.01    0.23
  -8   1  -4    0.19    0.47
  -9   0  -1    0.62    0.51
  -9   0  -1    0.22    0.28
  -9   0  -1    0.40    0.42
 -10  -1   2    0.38    0.53
 -10  -1   2   -0.82    0.33
   7  -3   9   -0.04    0.35
  -7   3  -9    0.37    0.38
  -7   3  -9    0.15    0.44
  -8   2  -6    8.86    0.84
  -8   2  -6    5.84    0.77
  -8   2  -6    8.47    1.05
  -9   1  -3    0.26    0.30
  -9   1  -3   -0.51    0.43
  -9   1  -3    0.35    0.41
 -10   0   0   -0.29    0.43
 -10   0   0    0.00    0.32
 -10   0   0   -0.67    0.44
   8  -3   8    0.34    0.36
  -8   3  -8    0.31    0.50
  -8   3  -8    0.07    0.35
  -9   2  -5    0.43    0.46
  -9   2  -5    0.55    0.32
  -9   2  -5    1.12    0.44
 -10   1  -2    0.34    0.32
 -10   1  -2    1.13    0.51
 -10   1  -2    0.92    0.53
  -9   3  -7    0.39    0.50
  -9   3  -7    0.55    0.40
  -9   3  -7    0.15    0.35
 -10   2  -4    4.45    0.63
 -10   2  -4    2.25    0.76
 -10   2  -4    3.76    0.71
 -11   1  -1   -0.05    0.49
 -11   1  -1    0.57    0.42
 -11   1  -1    1.15    0.67
 -10   3  -6    1.18    0.48
 -10   3  -6    2.34    0.71
 -10   3  -6    2.99    0.62
 -10   3  -6    2.19    0.50
  -9  10   0   -0.03    0.52
  -9  10   0   -1.66    0.46
  -9  10   0    0.35    0.67
   9 -10   0    0.25    0.55
  -8  11  -3   -0.36    0.57
  -8  11  -3    0.15    0.51
   8 -11   3    0.09    0.49
  -9   9   2   -0.36    0.47
  -9   9   2    0.78    0.64
   9  -9  -2    0.09    0.51
  -8  10  -1    3.48    0.83
  -8  10  -1    6.00    1.04
   8 -10   1    4.70    0.86
   8 -10   1    4.46    0.76
  -7  11  -4    0.49    0.53
  -7  11  -4   -0.29    0.58
   7 -11   4   -0.18    0.49
   7 -11   4    0.12    0.47
  -9   8   4    1.85    0.68
  -9   8   4    0.90    0.66
   9  -8  -4    3.26    0.73
  -8   9   1    0.17    0.48
  -8   9   1    0.27    0.47
   8  -9  -1    0.64    0.50
   8  -9  -1   -0.26    0.51
  -7  10  -2    1.24    0.60
  -7  10  -2    1.75    0.70
   7 -10   2    2.33    0.68
   7 -10   2    2.70    0.63
  -6  11  -5    1.95    0.63
  -6  11  -5    2.37    0.76
   6 -11   5    2.55    0.68
   6 -11   5    2.36    0.62
  -8   8   3    3.99    0.76
  -8   8   3    2.33    0.69
   8  -8  -3    1.52    0.61
   8  -8  -3    3.63    0.70
  -7   9   0    2.07    0.76
  -7   9   0    2.36    0.63
   7  -9   0    3.31    0.70
   7  -9   0    1.98    0.57
  -6  10  -3    1.98    0.61
  -6  10  -3    1.64    0.68
   6 -10   3    0.98    0.56
   6 -10   3    2.11    0.56
  -5  11  -6   15.64    1.50
  -5  11  -6    9.93    1.32
  -5  11  -6   13.06    1.34
   5 -11   6   11.21    1.31
   5 -11   6   11.72    1.42
   5 -11   6   13.69    1.25
  -8   7   5    6.62    0.95
  -8   7   5    6.04    0.95
   8  -7  -5    6.14    0.96
   8  -7  -5    4.94    0.85
  -7   8   2    4.55    0.86
  -7   8   2    6.28    0.72
   7  -8  -2    5.89    0.79
   7  -8  -2    3.20    0.77
  -6   9  -1   12.45    1.21
  -6   9  -1   12.72    1.31
   6  -9   1    9.24    1.19
   6  -9   1   11.22    1.14
  -5  10  -4   -0.45    0.52
  -5  10  -4    0.28    0.41
   5 -10   4    0.91    0.44
   5 -10   4   -0.17    0.42
  -4  11  -7    3.85    0.84
  -4  11  -7    3.06    0.77
  -4  11  -7    5.29    0.85
   4 -11   7    4.24    0.85
   4 -11   7    4.49    0.78
   4 -11   7    4.41    0.71
  -8   6   7    4.76    0.85
  -8   6   7    3.74    0.85
   8  -6  -7    5.63    0.95
   8  -6  -7    6.02    0.88
  -7   7   4    6.55    0.91
  -7   7   4    4.39    0.83
   7  -7  -4    4.51    0.83
   7  -7  -4    6.30    0.81
  -6   8   1    2.22    0.64
  -6   8   1    1.59    0.52
   6  -8  -1    1.75    0.54
   6  -8  -1    2.29    0.53
  -5   9  -2    2.23    0.57
  -5   9  -2    3.29    0.69
   5  -9   2    2.37    0.61
   5  -9   2    2.34    0.52
  -4  10  -5   10.47    1.11
  -4  10  -5   10.33    1.22
  -4  10  -5    9.72    1.13
   4 -10   5    7.22    1.08
   4 -10   5    8.36    1.02
   4 -10   5   10.32    1.02
  -3  11  -8    0.15    0.58
  -3  11  -8    1.32    0.59
   3 -11   8   -0.15    0.49
   3 -11   8    0.23    0.42
   3 -11   8    0.37    0.56
  -7   6   6    0.20    0.47
  -7   6   6    1.48    0.57
   7  -6  -6   -0.02    0.45
   7  -6  -6    0.05    0.46
  -6   7   3    0.92    0.47
   6  -7  -3    1.65    0.55
   6  -7  -3    0.20    0.39
  -5   8   0    0.29    0.43
  -5   8   0   -0.02    0.43
   5  -8   0    0.53    0.38
   5  -8   0    0.44    0.45
  -4   9  -3    2.72    0.69
  -4   9  -3    2.05    0.54
  -4   9  -3    2.66    0.57
   4  -9   3    2.86    0.55
   4  -9   3    3.08    0.67
  -3  10  -6    8.38    1.15
  -3  10  -6   11.37    1.21
  -3  10  -6   11.53    1.31
   3 -10   6   12.81    1.32
   3 -10   6    9.64    1.03
   3 -10   6   11.43    1.12
  -2  11  -9   -0.08    0.52
  -2  11  -9    0.60    0.63
   2 -11   9   -0.05    0.45
   2 -11   9    0.08    0.51
   2 -11   9    1.55    0.65
  -7   5   8    0.75    0.56
  -7   5   8    0.77    0.53
   7  -5  -8    1.06    0.52
   7  -5  -8    0.03    0.51
  -6   6   5    0.67    0.44
   6  -6  -5    1.09    0.53
   6  -6  -5    1.78    0.49
  -5   7   2    0.08    0.43
  -5   7   2    0.57    0.42
   5  -7  -2   -0.13    0.37
   5  -7  -2    0.33    0.41
  -4   8  -1    3.56    0.70
  -4   8  -1    3.24    0.60
   4  -8   1    3.19    0.54
   4  -8   1    2.96    0.59
  -3   9  -4   -0.62    0.35
  -3   9  -4   -0.53    0.40
  -3   9  -4   -0.03    0.35
   3  -9   4    0.04    0.35
   3  -9   4    0.10    0.42
   3  -9   4   -0.42    0.37
  -2  10  -7    4.16    0.80
  -2  10  -7    4.15    0.75
   2 -10   7    3.05    0.59
   2 -10   7    4.40    0.81
   2 -10   7    3.56    0.70
  -6   5   7    8.86    1.02
  -6   5   7    8.49    1.06
   6  -5  -7    8.67    0.99
   6  -5  -7    8.89    1.12
  -5   6   4   15.34    1.38
   5  -6  -4   15.92    1.42
   5  -6  -4   14.82    1.32
  -4   7   1    2.10    0.48
  -4   7   1    1.39    0.51
   4  -7  -1    1.23    0.49
   4  -7  -1    1.32    0.42
  -3   8  -2    0.90    0.51
  -3   8  -2    0.20    0.38
  -3   8  -2    0.53    0.38
   3  -8   2    1.13    0.46
   3  -8   2    0.88    0.36
  -2   9  -5    0.35    0.40
  -2   9  -5    0.81    0.49
  -2   9  -5    0.63    0.42
   2  -9   5    0.01    0.34
   2  -9   5    0.62    0.42
   2  -9   5    1.07    0.50
  -1  10  -8    1.31    0.53
  -1  10  -8    0.31    0.58
   1 -10   8    0.61    0.56
   1 -10   8    0.75    0.51
   1 -10   8    1.11    0.46
  -6   4   9   -0.12    0.46
  -6   4   9    0.03    0.45
   6  -4  -9   -0.90    0.40
   6  -4  -9   -0.17    0.44
  -5   5   6    0.89    0.44
   5  -5  -6    0.63    0.39
   5  -5  -6   -0.07    0.40
  -4   6   3   -0.19    0.37
  -4   6   3    0.06    0.33
   4  -6  -3   -0.16    0.36
   4  -6  -3   -0.21    0.30
  -3   7   0    8.10    0.85
  -3   7   0    8.27    0.94
   3  -7   0    7.38    0.79
   3  -7   0    7.53    0.87
  -2   8  -3    3.30    0.65
  -2   8  -3    3.43    0.59
  -2   8  -3    3.17    0.54
   2  -8   3    3.39    0.50
   2  -8   3    3.50    0.58
   2  -8   3    1.61    0.53
  -1   9  -6    1.26    0.59
  -1   9  -6    1.85    0.52
   1  -9   6    1.44    0.41
   1  -9   6    2.00    0.53
   1  -9   6    1.75    0.59
   0  10  -9    1.43    0.63
   0  10  -9    3.45    0.73
   0 -10   9    2.27    0.55
   0 -10   9    2.01    0.69
   0 -10   9    3.09    0.66
   6  -3 -11    0.55    0.50
  -5   4   8    1.02    0.49
  -5   4   8    0.74    0.48
   5  -4  -8    0.31    0.48
   5  -4  -8    0.18    0.38
  -4   5   5    0.26    0.35
   4  -5  -5   -0.12    0.40
   4  -5  -5    0.39    0.35
  -3   6   2    0.00    0.32
  -3   6   2    0.84    0.38
   3  -6  -2    0.23    0.36
   3  -6  -2    0.12    0.28
  -2   7  -1   37.15    2.66
  -2   7  -1   36.52    2.58
  -2   7  -1   35.52    2.59
   2  -7   1   38.51    2.54
   2  -7   1   35.79    2.65
  -1   8  -4    2.09    0.48
  -1   8  -4    1.97    0.58
  -1   8  -4    1.70    0.48
   1  -8   4    2.39    0.52
   1  -8   4    1.72    0.41
   1  -8   4    2.58    0.57
   0   9  -7    0.50    0.52
   0   9  -7   -0.07    0.49
   0  -9   7   -0.02    0.42
   0  -9   7   -0.09    0.33
   0  -9   7    0.38    0.49
   1  10 -10    2.96    0.75
  -1 -10  10    1.82    0.61
  -1 -10  10    2.06    0.76
  -5   3  10    0.06    0.44
   5  -3 -10    0.18    0.50
   5  -3 -10   -0.16    0.40
  -4   4   7   -0.11    0.34
  -4   4   7   -0.07    0.41
   4  -4  -7    0.43    0.36
   4  -4  -7    0.13    0.39
  -3   5   4   12.06    1.10
  -3   5   4   13.12    1.13
   3  -5  -4   14.26    1.08
   3  -5  -4   12.28    1.20
  -2   6   1    0.01    0.34
  -2   6   1   -0.18    0.25
   2  -6  -1    0.45    0.26
   2  -6  -1   -0.03    0.31
  -1   7  -2    4.06    0.59
  -1   7  -2    3.47    0.65
  -1   7  -2    5.69    0.62
   1  -7   2    5.50    0.70
   0   8  -5    3.44    0.63
   0   8  -5    3.32    0.68
   0  -8   5    3.03    0.48
   0  -8   5    4.12    0.62
   0  -8   5    3.76    0.71
   1   9  -8    0.01    0.50
   1   9  -8    0.45    0.54
  -1  -9   8    0.55    0.43
  -1  -9   8    0.17    0.54
  -1  -9   8   -0.51    0.33
  -4   3   9   -0.27    0.36
  -4   3   9    0.13    0.39
   4  -3  -9   -0.01    0.37
   4  -3  -9   -0.08    0.44
  -3   4   6    1.22    0.41
   3  -4  -6    2.05    0.54
   3  -4  -6    1.56    0.40
  -2   5   3   14.15    1.13
  -2   5   3   12.99    1.10
   2  -5  -3   14.74    1.07
   2  -5  -3   13.16    1.18
  -1   6   0    5.66    0.58
  -1   6   0    4.41    0.51
  -1   6   0    4.27    0.59
   1  -6   0    3.30    0.56
   1  -6   0    4.74    0.49
   0   7  -3    6.32    0.68
   0   7  -3    5.90    0.76
   0   7  -3    4.99    0.62
   0  -7   3    3.66    0.66
   0  -7   3    6.55    0.60
   0  -7   3    6.51    0.69
   1   8  -6    0.11    0.45
   1   8  -6    0.30    0.42
  -1  -8   6   -0.49    0.30
  -1  -8   6   -0.18    0.41
  -1  -8   6   -0.28    0.28
   2   9  -9   -0.32    0.52
   2   9  -9    0.12    0.58
  -2  -9   9   -0.15    0.41
  -2  -9   9   -0.44    0.45
  -2  -9   9   -0.17    0.33
   4  -2 -11   -0.08    0.51
   4  -2 -11    0.36    0.44
  -3   3   8    7.64    0.87
  -3   3   8    8.58    0.78
   3  -3  -8    5.50    0.75
   3  -3  -8    6.14    0.92
  -2   4   5   -0.15    0.24
   2  -4  -5    0.17    0.36
   2  -4  -5    0.26    0.28
  -1   5   2    0.03    0.27
  -1   5   2    0.75    0.26
   1  -5  -2    0.23    0.21
   1  -5  -2    1.97    0.38
   0   6  -1    0.91    0.30
   0   6  -1    0.90    0.27
   0   6  -1    0.73    0.36
   0  -6   1    0.95    0.24
   0  -6   1    1.09    0.35
   1   7  -4    2.81    0.51
   1   7  -4    2.85    0.60
  -1  -7   4    1.64    0.47
  -1  -7   4    2.23    0.55
  -1  -7   4    2.76    0.38
   2   8  -7   -0.44    0.44
   2   8  -7   -0.44    0.42
  -2  -8   7    0.16    0.36
  -2  -8   7   -0.20    0.40
  -2  -8   7    0.45    0.30
   3  -2 -10    3.84    0.62
   3  -2 -10    3.87    0.77
  -2   3   7    4.83    0.66
   2  -3  -7    5.83    0.79
   2  -3  -7    5.86    0.64
  -1   4   4    2.59    0.40
  -1   4   4    3.35    0.42
   1  -4  -4    3.05    0.49
   1  -4  -4    2.92    0.36
   0   5   1    5.43    0.54
   0   5   1    4.88    0.58
   0  -5  -1    4.99    0.40
   0  -5  -1    4.47    0.57
   0  -5  -1    4.91    0.40
   1   6  -2    2.15    0.49
   1   6  -2    2.60    0.42
  -1  -6   2    2.78    0.29
  -1  -6   2    2.04    0.45
  -1  -6   2    2.71    0.28
   2   7  -5    1.39    0.44
   2   7  -5    1.01    0.53
  -2  -7   5    1.53    0.30
  -2  -7   5    1.18    0.39
  -2  -7   5    1.63    0.48
   3   8  -8    0.28    0.47
   3   8  -8    0.22    0.54
  -3  -8   8   -0.94    0.33
  -3  -8   8   -0.32    0.37
  -3  -8   8    0.22    0.28
  -3   1  12    2.19    0.68
   3  -1 -12    2.21    0.55
   3  -1 -12    1.33    0.65
  -2   2   9    5.04    0.57
   2  -2  -9    5.42    0.66
   2  -2  -9    4.79    0.82
  -1   3   6    8.09    0.76
   1  -3  -6    7.84    0.70
   1  -3  -6    7.88    0.90
   0   4   3   12.20    0.97
   0  -4  -3   13.17    1.04
   1   5   0    0.37    0.27
   1   5   0    0.00    0.19
  -1  -5   0    0.08    0.23
   2   6  -3    5.85    0.64
   2   6  -3    4.97    0.74
  -2  -6   3    5.31    0.67
  -2  -6   3    6.85    0.64
   3   7  -6    4.41    0.79
   3   7  -6    5.10    0.71
  -3  -7   6    4.32    0.46
  -3  -7   6    4.47    0.58
  -3  -7   6    3.81    0.70
   4   8  -9   -0.73    0.47
   4   8  -9   -0.33    0.49
  -4  -8   9   -0.14    0.25
  -4  -8   9    0.46    0.54
  -4  -8   9   -0.25    0.41
  -2   1  11    0.13    0.48
   2  -1 -11    0.65    0.54
   2  -1 -11    0.64    0.39
   1  -2  -8    8.46    0.79
   1  -2  -8    8.81    1.01
   0  -3  -5    5.32    0.64
   1   4   2    6.19    0.61
   1   4   2    6.65    0.56
  -1  -4  -2    6.10    0.60
   2   5  -1   43.34    2.84
   2   5  -1   42.11    2.96
  -2  -5   1   41.82    2.89
   3   6  -4    2.39    0.55
   3   6  -4    1.70    0.42
  -3  -6   4    2.19    0.38
  -3  -6   4    1.56    0.46
   4   7  -7    0.25    0.43
   4   7  -7   -0.29    0.44
  -4  -7   7    0.11    0.42
  -4  -7   7    0.16    0.19
  -4  -7   7   -0.15    0.31
  -2   0  13    4.34    0.88
   2   0 -13    4.78    0.69
   2   0 -13    3.59    0.88
   1  -1 -10   -0.23    0.30
   1  -1 -10    0.19    0.44
   0  -2  -7    2.74    0.34
   0  -2  -7    1.77    0.52
   0  -2  -7    3.18    0.33
   0  -2  -7    3.17    0.36
   1   3   4    6.14    0.52
  -1  -3  -4    6.03    0.60
   2   4   1   11.53    0.92
  -2  -4  -1   10.21    0.83
  -2  -4  -1   11.14    0.83
   3   5  -2   -0.06    0.32
   3   5  -2    0.16    0.24
  -3  -5   2    0.11    0.27
   4   6  -5    8.16    0.98
   4   6  -5    8.98    0.86
  -4  -6   5    7.18    0.68
  -4  -6   5    5.74    0.84
   5   7  -8    5.40    0.99
   5   7  -8    4.03    0.79
  -5  -7   8    2.72    0.72
  -1   0  12    2.18    0.61
   1   0 -12    0.79    0.58
   1   0 -12    0.61    0.37
   0  -1  -9    0.34    0.24
   0  -1  -9   -0.37    0.40
   0  -1  -9    0.02    0.20
  -1  -2  -6    0.41    0.32
  -1  -2  -6    0.73    0.28
   2   3   3   18.56    1.32
  -2  -3  -3   18.90    1.41
  -2  -3  -3   18.79    1.31
  -2  -3  -3   18.80    1.31
   3   4   0   17.46    1.40
  -3  -4   0   18.65    1.29
  -3  -4   0   18.76    1.31
   4   5  -3    6.16    0.65
   4   5  -3    5.19    0.76
  -4  -5   3    7.25    0.74
   5   6  -6    1.20    0.53
  -5  -6   6    0.94    0.46
   0   0  11   -0.31    0.42
   0   0 -11    0.05    0.51
   0   0 -11   -0.34    0.25
   1   1   8  172.39   11.35
  -1  -1  -8  179.24   11.40
  -1  -1  -8  169.16   11.24
  -2  -2  -5    3.88    0.47
  -2  -2  -5    3.41    0.43
  -2  -2  -5    3.00    0.46
   3   3   2    4.30    0.51
  -3  -3  -2    4.79    0.62
  -3  -3  -2    5.37    0.41
  -3  -3  -2    4.72    0.40
   4   4  -1    3.87    0.56
  -4  -4   1    2.19    0.35
  -4  -4   1    2.66    0.37
   5   5  -4    2.74    0.60
  -5  -5   4    2.46    0.49
  -5  -5   4    1.54    0.37
   6   6  -7    0.51    0.53
  -6  -6   7    0.33    0.47
   0  -1  13    1.79    0.65
   0   1 -13    0.99    0.35
   0   1 -13   -0.29    0.53
   1   0  10    5.96    0.81
  -1   0 -10    6.58    0.53
  -1   0 -10    6.02    0.66
  -1   0 -10    4.31    0.81
   2   1   7   24.38    1.81
  -2  -1  -7   25.26    1.78
  -2  -1  -7   23.79    1.83
   3   2   4   10.69    0.80
  -3  -2  -4   10.98    0.81
  -3  -2  -4   11.17    0.80
  -3  -2  -4   10.48    0.97
   4   3   1    2.00    0.37
  -4  -3  -1    1.70    0.47
   5   4  -2    2.61    0.54
  -5  -4   2    2.57    0.41
   6   5  -5    1.85    0.59
  -6  -5   5    1.23    0.47
   1  -1  12    0.37    0.48
  -1   1 -12    0.41    0.26
  -1   1 -12    0.20    0.48
   2   0   9   19.86    1.59
  -2   0  -9   19.28    1.51
  -2   0  -9   20.56    1.65
   3   1   6    1.64    0.37
  -3  -1  -6    1.34    0.36
  -3  -1  -6    1.59    0.41
  -3  -1  -6    1.72    0.34
   4   2   3    8.30    0.63
   4   2   3    7.58    0.69
  -4  -2  -3    8.42    0.86
   5   3   0   10.48    0.98
  -5  -3   0   10.38    0.79
  -5  -3   0   11.00    0.79
   6   4  -3   16.15    1.32
  -6  -4   3   12.00    1.12
   7   5  -6    3.91    0.82
  -7  -5   6    4.18    0.74
   2  -1  11    2.47    0.56
  -2   1 -11    1.28    0.43
  -2   1 -11    1.33    0.54
   3   0   8    3.33    0.54
  -3   0  -8    2.63    0.54
  -3   0  -8    3.49    0.54
   4   1   5    2.13    0.37
  -4  -1  -5    2.77    0.36
  -4  -1  -5    2.50    0.32
  -4  -1  -5    1.78    0.49
   5   2   2   -0.02    0.24
  -5  -2  -2    0.37    0.40
   6   3  -1    2.50    0.54
  -6  -3   1    2.26    0.57
  -6  -3   1    2.25    0.37
  -6  -3   1    2.36    0.36
   7   4  -4    1.63    0.56
  -7  -4   4    1.61    0.48
   2  -2  13    0.21    0.53
  -2   2 -13    0.17    0.48
   3  -1  10    0.15    0.41
  -3   1 -10   -0.08    0.33
  -3   1 -10    0.29    0.41
   4   0   7   18.95    1.44
  -4   0  -7   17.12    1.45
  -4   0  -7   21.63    1.53
   5   1   4    0.52    0.21
  -5  -1  -4    0.44    0.41
  -6  -2  -1    0.65    0.43
  -6  -2  -1    0.57    0.39
  -7  -3   2   77.93    5.50
  -7  -3   2   89.28    5.64
   8   4  -5    6.38    0.99
  -8  -4   5    5.86    0.83
   3  -2  12    1.27    0.53
  -3   2 -12    0.76    0.51
  -3   2 -12    0.95    0.49
   4  -1   9    0.43    0.39
  -4   1  -9    1.23    0.45
  -4   1  -9    0.94    0.43
   5   0   6   11.90    0.91
  -5   0  -6    9.38    0.88
  -5   0  -6   11.46    1.05
  -6  -1  -3    2.07    0.46
  -6  -1  -3    2.80    0.58
  -7  -2   0    0.52    0.44
  -7  -2   0   -0.03    0.21
  -7  -2   0    0.09    0.38
  -8  -3   3   11.94    1.12
  -8  -3   3   13.38    1.31
   4  -2  11    0.38    0.43
  -4   2 -11    0.05    0.39
  -4   2 -11   -0.25    0.40
   5  -1   8    2.56    0.48
  -5   1  -8    1.93    0.51
  -5   1  -8    2.00    0.46
   6   0   5   -0.04    0.19
  -6   0  -5    0.12    0.29
  -6   0  -5    0.33    0.38
  -6   0  -5    0.60    0.21
  -6   0  -5    0.42    0.22
  -7  -1  -2    2.32    0.28
  -7  -1  -2    2.31    0.50
  -7  -1  -2    2.02    0.25
  -7  -1  -2    1.49    0.56
  -8  -2   1    4.49    0.56
  -8  -2   1    3.44    0.68
  -9  -3   4    1.62    0.53
  -9  -3   4    0.56    0.62
   5  -2  10    1.78    0.53
  -5   2 -10    2.57    0.61
  -5   2 -10    3.02    0.61
   6  -1   7   20.08    1.45
  -6   1  -7   17.00    1.45
  -6   1  -7   21.38    1.64
  -7   0  -4    0.29    0.34
  -7   0  -4    1.55    0.55
  -7   0  -4    0.62    0.22
  -8  -1  -1    0.05    0.39
  -8  -1  -1   -0.02    0.21
  -8  -1  -1    0.63    0.47
  -9  -2   2    4.82    0.68
  -9  -2   2    5.36    0.89
   5  -3  12   -0.59    0.43
  -5   3 -12    0.55    0.49
  -5   3 -12    0.10    0.47
   6  -2   9   11.16    1.06
  -6   2  -9   11.83    1.19
  -6   2  -9   10.78    1.09
   7  -1   6    2.16    0.38
  -7   1  -6    2.39    0.47
  -7   1  -6    1.95    0.55
  -7   1  -6    2.38    0.41
  -8   0  -3    0.97    0.50
  -8   0  -3    0.19    0.24
  -8   0  -3    0.65    0.41
  -9  -1   0   -0.08    0.44
  -9  -1   0   -0.21    0.28
  -9  -1   0    0.10    0.45
 -10  -2   3    0.01    0.38
 -10  -2   3    0.76    0.57
   6  -3  11   -0.22    0.38
  -6   3 -11    0.46    0.44
  -6   3 -11   -0.40    0.41
   7  -2   8   -0.09    0.31
  -7   2  -8    0.39    0.44
  -7   2  -8   -0.20    0.31
  -8   1  -5    0.25    0.28
  -8   1  -5    0.67    0.39
  -8   1  -5    0.30    0.45
  -9   0  -2   -0.35    0.24
  -9   0  -2    0.41    0.44
  -9   0  -2   -0.54    0.46
 -10  -1   1   -0.50    0.30
 -10  -1   1   -0.10    0.50
 -10  -1   1    0.17    0.51
   7  -3  10    1.25    0.47
  -7   3 -10    0.55    0.50
  -7   3 -10    1.25    0.49
  -8   2  -7    1.45    0.42
  -8   2  -7    1.96    0.46
  -8   2  -7    1.70    0.59
  -9   1  -4   -0.50    0.34
  -9   1  -4    0.07    0.29
  -9   1  -4   -0.05    0.47
 -10   0  -1    9.41    1.05
 -10   0  -1    6.75    1.02
 -10   0  -1    5.70    0.75
  -8   3  -9    1.12    0.55
  -8   3  -9   -0.11    0.37
  -9   2  -6    0.13    0.30
 -10   1  -3    5.24    0.81
 -10   1  -3    4.70    0.90
 -10   1  -3    4.37    0.61
  -9   3  -8   -1.00    0.41
 -10   2  -5    8.48    0.93
 -10   2  -5    9.92    1.08
 -10   2  -5    9.08    1.28
  -8  11  -2    0.09    0.57
  -8  11  -2    1.04    0.59
   8 -11   2    0.83    0.53
  -9   9   3    1.70    0.68
  -9   9   3    0.43    0.62
   9  -9  -3    1.88    0.63
  -8  10   0   -0.76    0.58
  -8  10   0   -0.81    0.40
   8 -10   0   -0.31    0.47
   8 -10   0   -0.27    0.45
  -7  11  -3    0.16    0.53
  -7  11  -3    0.37    0.51
   7 -11   3    0.45    0.47
   7 -11   3    0.25    0.55
  -8   9   2    3.75    0.81
   8  -9  -2    3.40    0.82
   8  -9  -2    2.64    0.67
  -7  10  -1    7.03    1.02
  -7  10  -1    7.34    1.10
   7 -10   1    7.43    0.93
   7 -10   1    5.75    0.97
  -6  11  -4    0.45    0.60
  -6  11  -4    0.66    0.53
   6 -11   4    1.58    0.52
   6 -11   4    0.27    0.53
  -8   8   4    0.79    0.54
  -8   8   4   -0.16    0.53
   8  -8  -4    0.16    0.47
   8  -8  -4    0.38    0.53
  -7   9   1    1.24    0.63
  -7   9   1    0.77    0.50
   7  -9  -1    1.40    0.54
   7  -9  -1    0.90    0.55
  -6  10  -2   11.03    1.29
  -6  10  -2   15.65    1.44
   6 -10   2   14.43    1.26
   6 -10   2    9.97    1.31
  -5  11  -5    0.06    0.43
  -5  11  -5    0.00    0.53
   5 -11   5   -0.03    0.48
   5 -11   5   -0.86    0.38
  -8   7   6   -0.17    0.46
  -8   7   6    1.28    0.63
   8  -7  -6    0.97    0.55
   8  -7  -6    0.28    0.53
  -7   8   3    0.89    0.53
   7  -8  -3    0.11    0.49
   7  -8  -3    1.43    0.52
  -6   9   0    8.41    1.04
  -6   9   0    6.54    1.00
   6  -9   0    8.22    1.06
   6  -9   0    6.32    0.84
  -5  10  -3    4.66    0.85
  -5  10  -3    2.83    0.67
   5 -10   3    5.52    0.74
   5 -10   3    6.18    0.90
  -4  11  -6    1.91    0.69
  -4  11  -6    2.33    0.99
  -4  11  -6    1.46    0.59
   4 -11   6    1.56    0.53
   4 -11   6    2.15    0.62
   4 -11   6    1.04    0.58
  -7   7   5    1.07    0.58
  -7   7   5    1.61    0.56
   7  -7  -5    1.35    0.53
   7  -7  -5    1.33    0.60
  -6   8   2    7.83    1.05
  -6   8   2   11.46    1.24
   6  -8  -2    8.95    1.00
   6  -8  -2    9.59    1.14
  -5   9  -1    9.67    1.08
  -5   9  -1   11.83    1.23
   5  -9   1    9.21    1.19
   5  -9   1   11.21    1.04
  -4  10  -4    4.15    0.72
  -4  10  -4    4.74    0.84
  -4  10  -4    3.72    0.70
   4 -10   4    3.44    0.74
   4 -10   4    4.17    0.66
  -3  11  -7    3.69    0.76
  -3  11  -7    3.21    0.81
   3 -11   7    3.41    0.73
   3 -11   7    3.12    0.61
   3 -11   7    2.46    0.75
  -7   6   7    3.83    0.74
  -7   6   7    1.27    0.58
   7  -6  -7    2.18    0.60
   7  -6  -7    2.51    0.69
  -6   7   4    1.66    0.58
   6  -7  -4    1.78    0.62
   6  -7  -4    0.96    0.49
  -5   8   1   13.48    1.37
  -5   8   1   15.04    1.31
   5  -8  -1   13.95    1.33
   5  -8  -1   12.20    1.22
  -4   9  -2   -0.16    0.36
  -4   9  -2    1.16    0.53
   4  -9   2   -0.27    0.35
   4  -9   2    0.16    0.39
  -3  10  -5    0.47    0.46
  -3  10  -5   -0.15    0.51
  -3  10  -5    0.43    0.42
   3 -10   5    0.32    0.49
   3 -10   5    0.11    0.44
   3 -10   5   -0.31    0.36
  -2  11  -8    0.46    0.55
  -2  11  -8   -0.20    0.55
   2 -11   8   -0.07    0.47
   2 -11   8   -0.36    0.48
   2 -11   8    0.57    0.43
  -7   5   9    1.71    0.58
   7  -5  -9    1.39    0.67
   7  -5  -9    1.68    0.56
  -6   6   6    1.44    0.60
  -6   6   6    1.69    0.52
   6  -6  -6    1.70    0.60
   6  -6  -6    1.51    0.51
  -5   7   3    0.29    0.38
  -5   7   3    0.63    0.44
   5  -7  -3   -0.03    0.37
   5  -7  -3   -0.28    0.40
  -4   8   0   24.45    1.84
  -4   8   0   19.53    1.71
   4  -8   0   19.01    1.77
   4  -8   0   24.99    1.70
  -3   9  -3    1.14    0.47
  -3   9  -3    0.64    0.40
  -3   9  -3    1.46    0.52
   3  -9   3    0.41    0.38
   3  -9   3    0.89    0.48
  -2  10  -6    9.89    1.24
  -2  10  -6   11.68    1.18
   2 -10   6   10.25    1.05
   2 -10   6   10.40    1.24
   2 -10   6   11.43    1.13
  -1  11  -9    2.34    0.66
  -1  11  -9    1.12    0.66
   1 -11   9    2.06    0.66
   1 -11   9    1.51    0.50
   1 -11   9    3.08    0.78
  -6   5   8    0.15    0.45
  -6   5   8    0.18    0.48
   6  -5  -8    0.06    0.42
   6  -5  -8    0.13    0.51
  -5   6   5    9.43    0.99
   5  -6  -5    8.49    1.11
   5  -6  -5    9.39    0.98
  -4   7   2    2.44    0.58
  -4   7   2    1.13    0.45
   4  -7  -2    2.21    0.55
   4  -7  -2    1.56    0.42
  -3   8  -1    0.82    0.51
  -3   8  -1    1.90    0.48
  -3   8  -1    1.77    0.44
   3  -8   1    1.49    0.51
   3  -8   1    1.21    0.39
  -2   9  -4    3.24    0.62
  -2   9  -4    2.78    0.57
  -2   9  -4    3.06    0.68
   2  -9   4    4.07    0.57
   2  -9   4    2.94    0.69
   2  -9   4    4.03    0.65
  -1  10  -7   -0.03    0.43
  -1  10  -7   -0.49    0.49
   1 -10   7   -0.05    0.36
   1 -10   7    0.35    0.47
   1 -10   7   -0.46    0.45
  -6   4  10    0.45    0.47
   6  -4 -10    0.52    0.55
   6  -4 -10   -0.71    0.40
  -5   5   7   -0.08    0.45
  -5   5   7    0.25    0.41
   5  -5  -7   -0.41    0.35
   5  -5  -7    0.01    0.41
  -4   6   4    0.51    0.36
   4  -6  -4    1.54    0.44
   4  -6  -4    1.42    0.52
  -3   7   1    0.09    0.30
  -3   7   1    0.08    0.40
   3  -7  -1    0.44    0.38
   3  -7  -1   -0.53    0.29
  -2   8  -2    0.27    0.44
  -2   8  -2   -0.21    0.35
  -2   8  -2    0.18    0.32
   2  -8   2   -0.52    0.28
   2  -8   2   -0.08    0.37
  -1   9  -5   -0.05    0.48
  -1   9  -5    0.42    0.41
   1  -9   5    0.07    0.43
   1  -9   5    0.27    0.33
   1  -9   5    0.23    0.44
   0  10  -8   -0.17    0.45
   0  10  -8    0.47    0.56
   0 -10   8    0.29    0.46
   0 -10   8    0.78    0.55
   0 -10   8    0.65    0.41
  -5   4   9    2.13    0.56
   5  -4  -9    3.18    0.59
   5  -4  -9    0.78    0.59
  -4   5   6   -0.11    0.32
   4  -5  -6   -0.29    0.32
   4  -5  -6    0.20    0.42
  -3   6   3    2.26    0.48
  -3   6   3    1.68    0.43
   3  -6  -3    1.67    0.41
   3  -6  -3    1.12    0.46
  -2   7   0    0.23    0.30
  -2   7   0    0.52    0.42
  -2   7   0    0.60    0.35
   2  -7   0    0.62    0.41
   2  -7   0    0.15    0.30
  -1   8  -3   16.52    1.36
  -1   8  -3   16.54    1.35
  -1   8  -3   18.20    1.49
   1  -8   3   17.66    1.36
   1  -8   3   15.98    1.28
   1  -8   3   15.37    1.44
   0   9  -6    1.50    0.58
   0   9  -6    3.50    0.63
   0  -9   6    2.22    0.45
   0  -9   6    1.84    0.59
   0  -9   6    2.83    0.58
   1  10  -9    0.64    0.56
   1  10  -9    0.61    0.59
  -1 -10   9    0.50    0.37
  -1 -10   9   -0.08    0.57
  -1 -10   9    0.16    0.49
   5  -3 -11    2.31    0.58
   5  -3 -11    0.37    0.57
  -4   4   8    0.49    0.46
  -4   4   8   -0.02    0.54
   4  -4  -8    0.47    0.38
   4  -4  -8    0.59    0.50
  -3   5   5    1.26    0.40
   3  -5  -5    2.50    0.45
   3  -5  -5    1.46    0.51
  -2   6   2   -0.18    0.34
  -2   6   2    1.41    0.35
   2  -6  -2    0.66    0.30
   2  -6  -2    1.47    0.43
  -1   7  -1    1.14    0.36
  -1   7  -1    3.11    0.48
  -1   7  -1    2.35    0.51
   1  -7   1    1.06    0.44
   1  -7   1    2.67    0.38
   0   8  -4    4.03    0.60
   0   8  -4    4.42    0.72
   0  -8   4    2.99    0.63
   0  -8   4    3.94    0.50
   0  -8   4    3.89    0.60
   1   9  -7    0.86    0.53
   1   9  -7    1.28    0.58
  -1  -9   7    0.35    0.51
  -1  -9   7    1.04    0.46
  -1  -9   7    0.28    0.33
   4  -3 -10    4.82    0.71
   4  -3 -10    4.75    0.92
  -3   4   7   16.03    1.38
   3  -4  -7   15.20    1.45
   3  -4  -7   18.65    1.35
  -2   5   4   15.77    1.21
  -2   5   4   13.36    1.19
   2  -5  -4   17.09    1.31
   2  -5  -4   14.49    1.14
  -1   6   1   12.56    0.99
  -1   6   1   11.87    0.96
  -1   6   1   10.80    1.03
   1  -6  -1   12.09    1.05
   1  -6  -1   10.94    0.89
   0   7  -2    4.77    0.59
   0   7  -2    4.59    0.55
   0   7  -2    4.08    0.66
   0  -7   2    4.82    0.48
   0  -7   2    4.17    0.64
   1   8  -5   -0.83    0.33
   1   8  -5    0.47    0.44
  -1  -8   5   -0.04    0.25
  -1  -8   5    0.29    0.44
  -1  -8   5   -0.20    0.37
   2   9  -8    1.04    0.60
   2   9  -8   -0.89    0.49
  -2  -9   8    0.58    0.33
  -2  -9   8   -0.08    0.46
  -2  -9   8   -0.25    0.40
   4  -2 -12    0.09    0.46
   4  -2 -12   -0.21    0.52
  -3   3   9    1.05    0.40
   3  -3  -9    1.29    0.57
   3  -3  -9    1.55    0.45
  -2   4   6    1.57    0.38
   2  -4  -6    1.10    0.33
   2  -4  -6    1.06    0.47
  -1   5   3    9.63    0.80
  -1   5   3    6.68    0.69
   1  -5  -3    9.36    0.67
   1  -5  -3    6.81    0.81
   0   6   0   18.00    1.40
   0   6   0   17.65    1.32
   0  -6   0   17.50    1.20
   0  -6   0   17.90    1.40
   0  -6   0   16.91    1.20
   1   7  -3    2.00    0.53
   1   7  -3    1.96    0.44
  -1  -7   3    1.75    0.27
  -1  -7   3    1.84    0.41
  -1  -7   3    1.93    0.29
  -1  -7   3    2.27    0.53
   2   8  -6    2.10    0.62
   2   8  -6    3.12    0.60
  -2  -8   6    3.15    0.41
  -2  -8   6    2.40    0.50
  -2  -8   6    1.34    0.55
   3   9  -9    2.32    0.67
   3   9  -9    3.12    0.80
  -3  -9   9    1.66    0.40
  -3  -9   9    1.75    0.65
  -3  -9   9    2.71    0.60
   3  -2 -11   -0.10    0.49
   3  -2 -11   -0.25    0.37
   2  -3  -8    0.08    0.42
   2  -3  -8    1.58    0.39
  -1   4   5   -0.05    0.21
   1  -4  -5    0.41    0.36
   1  -4  -5   -0.17    0.20
   0   5   2    3.38    0.43
   0   5   2    3.12    0.46
   0  -5  -2    3.14    0.47
   1   6  -1   29.40    2.08
   1   6  -1   28.32    2.18
  -1  -6   1   31.37    2.15
   2   7  -4    0.35    0.36
   2   7  -4    0.29    0.45
  -2  -7   4    0.84    0.36
  -2  -7   4    0.29    0.17
  -2  -7   4    0.24    0.37
   3   8  -7   -0.21    0.49
   3   8  -7   -0.04    0.45
  -3  -8   7    0.18    0.43
  -3  -8   7    0.04    0.23
  -3  -8   7   -0.42    0.33
   2  -2 -10   32.59    2.50
   2  -2 -10   30.85    2.27
   1  -3  -7    1.82    0.34
   1  -3  -7    1.22    0.45
   0   4   4   13.87    1.08
   0  -4  -4   15.25    1.17
   1   5   1   20.03    1.37
   1   5   1   19.36    1.44
  -1  -5  -1   18.07    1.43
   2   6  -2    1.39    0.36
   2   6  -2    1.52    0.47
  -2  -6   2    0.92    0.38
   3   7  -5    4.84    0.66
   3   7  -5    4.31    0.76
  -3  -7   5    5.00    0.60
  -3  -7   5    3.34    0.64
   4   8  -8    1.52    0.64
   4   8  -8    2.38    0.66
  -4  -8   8    1.41    0.61
  -4  -8   8    1.94    0.31
  -4  -8   8    2.27    0.52
  -2   1  12    1.14    0.58
   2  -1 -12    0.20    0.39
   2  -1 -12   -0.25    0.48
   1  -2  -9   15.39    1.19
   1  -2  -9   15.40    1.46
   0  -3  -6    1.17    0.43
   1   4   3   16.20    1.17
   1   4   3   16.55    1.15
  -1  -4  -3   14.47    1.19
   2   5   0    7.12    0.77
   2   5   0    7.10    0.63
  -2  -5   0    7.07    0.65
  -2  -5   0    8.21    0.72
   3   6  -3    7.07    0.88
   3   6  -3    7.50    0.73
  -3  -6   3    6.00    0.75
   4   7  -6    2.89    0.69
   4   7  -6    3.07    0.58
  -4  -7   6    1.65    0.56
  -4  -7   6    2.76    0.47
  -1   1  11    6.56    0.91
   1  -1 -11    6.54    0.68
   1  -1 -11    4.07    0.85
   0  -2  -8   13.50    0.94
   0  -2  -8   13.08    0.98
   0  -2  -8   11.81    1.23
  -1  -3  -5  126.88    8.23
  -1  -3  -5  125.66    8.28
   2   4   2    4.89    0.54
  -2  -4  -2    4.64    0.51
  -2  -4  -2    4.70    0.48
   3   5  -1   23.47    1.84
   3   5  -1   22.69    1.69
  -3  -5   1   26.19    1.75
  -3  -5   1   25.62    1.76
   4   6  -4   -0.04    0.38
  -4  -6   4    1.11    0.42
  -4  -6   4    0.72    0.30
   5   7  -7    2.28    0.68
  -5  -7   7    1.56    0.59
  -1   0  13    0.24    0.50
   1   0 -13    0.33    0.36
   1   0 -13    0.93    0.64
   0   1  10   10.92    1.12
   0  -1 -10    9.37    0.80
   0  -1 -10   10.13    1.17
  -1  -2  -7    9.07    0.76
  -1  -2  -7    7.61    0.87
   2   3   4   -0.24    0.16
  -2  -3  -4   -0.20    0.21
  -2  -3  -4    0.68    0.29
  -2  -3  -4    0.04    0.19
   3   4   1    4.86    0.60
  -3  -4  -1    5.62    0.50
  -3  -4  -1    5.23    0.48
   4   5  -2   13.45    1.10
  -4  -5   2    9.14    0.92
   5   6  -5   18.39    1.65
  -5  -6   5   17.98    1.56
   6   7  -8    1.22    0.61
  -6  -7   8    0.62    0.53
   0   0  12    1.51    0.60
   0   0 -12   -0.04    0.52
   0   0 -12    0.68    0.32
   1   1   9    5.80    0.78
  -1  -1  -9    5.65    0.61
  -1  -1  -9    5.59    0.80
  -2  -2  -6   37.22    2.55
  -2  -2  -6   35.70    2.52
   3   3   3    0.83    0.25
  -3  -3  -3    0.68    0.20
  -3  -3  -3    1.15    0.38
  -3  -3  -3    0.75    0.19
   4   4   0   19.70    1.67
  -4  -4   0   23.16    1.54
  -4  -4   0   23.14    1.56
   5   5  -3    1.74    0.53
  -5  -5   3    2.68    0.48
   6   6  -6    2.95    0.69
  -6  -6   6    2.15    0.58
   1   0  11   -0.01    0.42
  -1   0 -11   -0.36    0.45
   2   1   8    1.64    0.45
  -2  -1  -8    3.02    0.57
  -2  -1  -8    1.57    0.39
  -3  -2  -5   15.65    1.09
  -3  -2  -5   13.65    1.18
  -3  -2  -5   13.99    1.10
   4   3   2    0.58    0.26
  -4  -3  -2    0.49    0.38
   5   4  -1    1.45    0.46
  -5  -4   1    1.54    0.30
  -5  -4   1    1.77    0.33
   6   5  -4   -0.21    0.39
  -6  -5   4    0.47    0.38
   7   6  -7    1.39    0.60
  -7  -6   7    1.47    0.58
   1  -1  13    2.74    0.74
  -1   1 -13    2.86    0.77
   2   0  10    5.27    0.76
  -2   0 -10    4.43    0.76
  -2   0 -10    4.60    0.60
   3   1   7    5.34    0.67
  -3  -1  -7    5.29    0.67
  -3  -1  -7    5.72    0.68
   4   2   4   21.36    1.52
   4   2   4   20.74    1.53
  -4  -2  -4   23.33    1.48
  -4  -2  -4   21.59    1.48
  -4  -2  -4   22.15    1.69
   5   3   1   10.28    0.95
  -5  -3  -1   11.37    1.09
   6   4  -2    1.69    0.51
  -6  -4   2    1.41    0.35
   7   5  -5    8.42    1.07
  -7  -5   5    5.76    0.86
   2  -1  12    1.14    0.53
  -2   1 -12    0.34    0.50
   3   0   9   -0.24    0.35
  -3   0  -9    0.45    0.40
  -3   0  -9    0.36    0.35
   4   1   6   12.67    1.02
  -4  -1  -6   13.49    1.16
  -4  -1  -6   12.06    1.01
   5   2   3    0.34    0.15
   5   2   3    0.07    0.20
  -5  -2  -3    0.12    0.38
   6   3   0   27.56    2.08
  -6  -3   0   27.30    1.90
  -6  -3   0   28.64    1.90
   7   4  -3   -0.20    0.37
  -7  -4   3    0.50    0.35
   8   5  -6    5.16    0.91
  -8  -5   6    4.44    0.80
   3  -1  11    7.38    0.91
  -3   1 -11    5.52    0.90
  -3   1 -11    7.54    0.84
   4   0   8    0.19    0.33
  -4   0  -8    0.43    0.36
  -4   0  -8   -0.24    0.31
   5   1   5    5.05    0.53
   5   1   5    3.88    0.46
  -5  -1  -5    5.67    0.48
  -5  -1  -5    5.71    0.51
  -5  -1  -5    6.00    0.77
  -6  -2  -2    4.00    0.67
  -6  -2  -2    2.95    0.58
   7   3  -1    2.41    0.55
  -7  -3   1    1.75    0.36
  -7  -3   1    1.30    0.54
   8   4  -4    7.74    1.02
  -8  -4   4    5.98    0.82
   4  -1  10    0.00    0.36
  -4   1 -10   -0.02    0.36
  -4   1 -10    0.48    0.43
   5   0   7   14.95    1.22
  -5   0  -7   15.74    1.35
  -5   0  -7   15.51    1.24
  -6  -1  -4    5.02    0.74
  -7  -2  -1    6.50    0.54
  -7  -2  -1    7.13    0.91
  -7  -2  -1    7.52    0.87
  -7  -2  -1    6.38    0.56
   8   3  -2    0.14    0.41
  -8  -3   2    0.53    0.34
  -8  -3   2    0.21    0.49
   4  -2  12    1.41    0.52
  -4   2 -12    0.49    0.47
  -4   2 -12    1.06    0.52
   5  -1   9    1.35    0.43
  -5   1  -9    0.42    0.43
  -5   1  -9    0.77    0.38
   6   0   6   26.73    1.88
  -6   0  -6   26.58    2.08
  -6   0  -6   27.01    1.89
  -7  -1  -3    1.52    0.56
  -7  -1  -3    1.11    0.44
  -8  -2   0    1.71    0.55
  -8  -2   0    0.88    0.51
  -8  -2   0    0.88    0.29
   9   3  -3    1.87    0.64
  -9  -3   3    4.06    0.63
  -9  -3   3    3.90    0.81
   5  -2  11    0.31    0.44
  -5   2 -11    0.23    0.43
  -5   2 -11    0.39    0.46
   6  -1   8    0.94    0.37
  -6   1  -8    0.52    0.34
  -6   1  -8    0.53    0.44
  -7   0  -5    0.53    0.50
  -7   0  -5    0.31    0.21
  -7   0  -5    0.56    0.36
  -8  -1  -2    0.64    0.43
  -8  -1  -2    0.06    0.48
  -8  -1  -2    0.47    0.22
  -9  -2   1    0.23    0.31
  -9  -2   1   -0.44    0.45
   6  -2  10   -0.09    0.36
  -6   2 -10    0.44    0.42
  -6   2 -10    0.14    0.43
  -7   1  -7    0.72    0.45
  -7   1  -7    0.19    0.27
  -8   0  -4    4.97    0.69
  -8   0  -4    3.75    0.44
  -8   0  -4    3.94    0.74
  -9  -1  -1    0.47    0.49
  -9  -1  -1    0.25    0.27
  -9  -1  -1   -0.47    0.45
 -10  -2   2   -0.15    0.36
 -10  -2   2   -0.02    0.59
   7  -2   9   -0.25    0.30
  -7   2  -9    0.12    0.45
  -7   2  -9   -0.09    0.33
  -8   1  -6    0.97    0.34
  -8   1  -6    2.85    0.62
  -8   1  -6    2.07    0.50
  -9   0  -3    0.21    0.26
  -9   0  -3    0.67    0.43
  -9   0  -3    0.62    0.59
 -10  -1   0   -0.18    0.45
 -10  -1   0   -0.47    0.28
 -10  -1   0   -0.02    0.55
  -8   2  -8    1.71    0.46
  -8   2  -8    1.37    0.61
  -9   1  -5    0.06    0.55
  -9   1  -5    0.89    0.44
  -9   1  -5    1.20    0.34
 -10   0  -2    1.59    0.64
 -10   0  -2   -0.07    0.28
 -10   0  -2   -0.13    0.46
  -9   2  -7    3.02    0.57
  -9   2  -7    4.02    0.81
  -9   2  -7    4.44    0.66
 -10   1  -4    1.96    0.58
 -10   1  -4    2.05    0.68
 -10   1  -4    2.08    0.45
  -8  11  -1   -0.42    0.45
  -8  11  -1   -0.32    0.64
   8 -11   1   -0.04    0.47
   8 -11   1    0.12    0.53
  -8  10   1   -0.06    0.48
   8 -10  -1    0.10    0.52
   8 -10  -1    0.71    0.54
  -7  11  -2    0.48    0.53
  -7  11  -2    0.03    0.62
   7 -11   2    0.56    0.47
   7 -11   2    0.59    0.56
  -6  12  -5    2.42    0.83
   6 -12   5    2.25    0.59
   6 -12   5    2.17    0.72
  -8   9   3    3.54    0.78
   8  -9  -3    4.14    0.73
   8  -9  -3    1.96    0.68
  -7  10   0    0.98    0.53
  -7  10   0    0.43    0.59
   7 -10   0    0.86    0.49
   7 -10   0    0.71    0.54
  -6  11  -3   -0.50    0.54
  -6  11  -3    0.64    0.54
   6 -11   3    1.11    0.51
   6 -11   3    0.61    0.56
  -5  12  -6   -0.07    0.56
   5 -12   6    1.31    0.60
   5 -12   6   -0.13    0.47
  -8   8   5    0.83    0.61
  -8   8   5    1.60    0.62
   8  -8  -5    1.21    0.64
   8  -8  -5    0.98    0.58
  -7   9   2    0.52    0.49
   7  -9  -2   -0.58    0.43
   7  -9  -2   -0.80    0.38
  -6  10  -1    5.56    0.93
  -6  10  -1    4.40    0.81
   6 -10   1    4.29    0.83
   6 -10   1    5.82    0.77
  -5  11  -4    7.89    1.14
  -5  11  -4    5.33    0.92
   5 -11   4    6.44    0.98
   5 -11   4    7.72    0.89
  -4  12  -7    2.13    0.75
  -4  12  -7    1.23    0.60
   4 -12   7    1.53    0.62
   4 -12   7    1.59    0.54
   4 -12   7    0.46    0.59
  -7   8   4    0.20    0.45
   7  -8  -4    0.61    0.46
   7  -8  -4    0.33    0.51
  -6   9   1    0.69    0.55
  -6   9   1    1.37    0.54
   6  -9  -1    1.68    0.59
   6  -9  -1    0.77    0.45
  -5  10  -2    2.25    0.60
  -5  10  -2    0.46    0.56
   5 -10   2    1.29    0.46
   5 -10   2    2.00    0.65
  -4  11  -5    1.86    0.54
  -4  11  -5    0.89    0.62
   4 -11   5   -0.26    0.44
   4 -11   5    1.75    0.49
  -7   7   6   -0.85    0.48
  -7   7   6   -0.19    0.43
   7  -7  -6   -0.49    0.47
   7  -7  -6   -0.28    0.40
  -6   8   3    0.24    0.45
   6  -8  -3    0.42    0.42
   6  -8  -3   -0.03    0.48
  -5   9   0    3.82    0.68
  -5   9   0    5.21    0.83
   5  -9   0    2.01    0.66
   5  -9   0    4.36    0.66
  -4  10  -3    1.24    0.63
  -4  10  -3    2.45    0.59
  -4  10  -3    1.65    0.54
   4 -10   3    1.57    0.58
   4 -10   3    1.54    0.48
  -3  11  -6    0.35    0.60
  -3  11  -6    0.15    0.50
   3 -11   6    0.03    0.41
   3 -11   6   -0.33    0.46
   3 -11   6    0.82    0.54
  -7   6   8    2.53    0.68
   7  -6  -8    1.68    0.67
   7  -6  -8    1.32    0.58
  -6   7   5    2.89    0.65
   6  -7  -5    3.95    0.67
   6  -7  -5    3.35    0.78
  -5   8   2    2.10    0.54
  -5   8   2    1.39    0.55
   5  -8  -2    0.98    0.52
   5  -8  -2    0.86    0.43
  -4   9  -1    0.91    0.43
  -4   9  -1    0.96    0.55
   4  -9   1    0.77    0.48
   4  -9   1    0.89    0.41
  -3  10  -4    4.89    0.76
  -3  10  -4    4.39    0.81
   3 -10   4    3.15    0.75
   3 -10   4    4.37    0.65
  -2  11  -7    0.92    0.60
  -2  11  -7   -0.42    0.44
   2 -11   7   -0.30    0.37
   2 -11   7    0.11    0.52
   2 -11   7    0.20    0.50
  -6   6   7    0.35    0.51
  -6   6   7    1.04    0.77
   6  -6  -7    0.46    0.49
   6  -6  -7    0.25    0.42
  -5   7   4   -0.13    0.36
   5  -7  -4    0.03    0.47
   5  -7  -4   -0.22    0.36
  -4   8   1   -0.05    0.34
  -4   8   1   -0.53    0.39
   4  -8  -1   -0.11    0.33
   4  -8  -1    0.62    0.44
  -3   9  -2    0.79    0.42
  -3   9  -2    0.37    0.48
  -3   9  -2    0.14    0.36
   3  -9   2    0.91    0.38
   3  -9   2    1.04    0.48
  -2  10  -5    3.37    0.66
  -2  10  -5    4.69    0.82
   2 -10   5    1.54    0.63
   2 -10   5    3.87    0.60
   2 -10   5    4.07    0.67
  -1  11  -8   -0.34    0.56
  -1  11  -8    0.10    0.50
   1 -11   8    1.08    0.45
   1 -11   8   -0.60    0.43
   1 -11   8   -0.01    0.51
  -6   5   9    0.00    0.48
   6  -5  -9    0.61    0.57
   6  -5  -9    0.28    0.45
  -5   6   6    0.45    0.42
   5  -6  -6    0.45    0.41
   5  -6  -6    0.27    0.46
  -4   7   3    0.05    0.39
  -4   7   3    0.46    0.36
   4  -7  -3   -0.01    0.38
   4  -7  -3    0.25    0.34
  -3   8   0    1.81    0.55
  -3   8   0    2.20    0.49
   3  -8   0    2.48    0.56
   3  -8   0    1.47    0.42
  -2   9  -3    4.94    0.71
  -2   9  -3    4.55    0.78
   2  -9   3    4.06    0.59
   2  -9   3    5.17    0.81
  -1  10  -6    2.79    0.64
  -1  10  -6    1.31    0.62
   1 -10   6    2.53    0.50
   1 -10   6    2.29    0.67
   1 -10   6    2.70    0.60
  -5   5   8    1.45    0.55
   5  -5  -8    0.25    0.50
   5  -5  -8    0.73    0.42
  -4   6   5    0.10    0.33
   4  -6  -5    0.39    0.44
   4  -6  -5    0.14    0.33
  -3   7   2   -0.16    0.37
  -3   7   2    0.55    0.35
   3  -7  -2    0.50    0.30
   3  -7  -2   -0.14    0.37
  -2   8  -1    0.48    0.37
  -2   8  -1    0.24    0.40
  -2   8  -1   -0.43    0.27
   2  -8   1    0.07    0.31
   2  -8   1    0.51    0.43
  -1   9  -4    0.23    0.46
  -1   9  -4    0.95    0.44
   1  -9   4    0.75    0.35
   1  -9   4   -0.09    0.37
   1  -9   4   -0.32    0.39
   0  10  -7    0.14    0.54
   0  10  -7   -0.25    0.39
   0 -10   7   -0.02    0.44
   0 -10   7    0.10    0.49
   0 -10   7    0.06    0.36
   5  -4 -10    1.07    0.61
   5  -4 -10    1.22    0.50
   4  -5  -7    0.19    0.35
   4  -5  -7    0.47    0.45
  -3   6   4    6.21    0.77
  -3   6   4    8.01    0.83
   3  -6  -4    7.87    0.76
   3  -6  -4    6.27    0.87
  -2   7   1    3.80    0.57
  -2   7   1    4.41    0.66
   2  -7  -1    4.50    0.66
   2  -7  -1    4.23    0.51
  -1   8  -2   16.65    1.32
  -1   8  -2   14.79    1.37
   1  -8   2   15.16    1.19
   1  -8   2   15.27    1.39
   0   9  -5    0.23    0.45
   0   9  -5    0.67    0.40
   0  -9   5   -0.81    0.36
   0  -9   5    0.24    0.31
   0  -9   5    0.74    0.46
   1  10  -8   -0.13    0.53
   1  10  -8    0.05    0.53
  -1 -10   8   -0.16    0.51
  -1 -10   8    0.32    0.45
  -1 -10   8    0.05    0.31
  -4   4   9    1.52    0.51
   4  -4  -9    1.12    0.59
   4  -4  -9    0.79    0.43
   3  -5  -6    2.92    0.49
   3  -5  -6    3.90    0.71
  -2   6   3    3.06    0.52
  -2   6   3    3.54    0.50
   2  -6  -3    2.54    0.57
   2  -6  -3    3.05    0.43
  -1   7   0    8.13    0.78
  -1   7   0    6.79    0.73
  -1   7   0    9.83    0.93
   1  -7   0    8.11    0.69
   1  -7   0    6.30    0.83
   0   8  -3    5.76    0.71
   0   8  -3    6.02    0.83
   0  -8   3    5.72    0.78
   0  -8   3    6.05    0.60
   1   9  -6    7.67    0.95
   1   9  -6    5.85    0.94
  -1  -9   6    5.56    0.93
  -1  -9   6    7.26    0.73
  -1  -9   6    7.83    0.86
   4  -3 -11    0.67    0.56
   4  -3 -11    1.13    0.49
   3  -4  -8    3.85    0.74
   3  -4  -8    4.06    0.58
  -2   5   5    3.29    0.57
   2  -5  -5    4.34    0.50
   2  -5  -5    3.63    0.65
  -1   6   2    1.10    0.39
  -1   6   2    0.37    0.25
   1  -6  -2    0.52    0.36
   1  -6  -2    0.56    0.23
   0   7  -1    6.42    0.80
   0   7  -1    6.34    0.69
   0  -7   1    6.39    0.77
   0  -7   1    5.87    0.52
   0  -7   1    5.43    0.52
   1   8  -4    0.89    0.49
   1   8  -4    0.70    0.40
  -1  -8   4   -0.80    0.34
  -1  -8   4    0.22    0.40
  -1  -8   4   -0.24    0.21
   2   9  -7   -0.17    0.48
   2   9  -7    0.81    0.55
  -2  -9   7    0.28    0.44
  -2  -9   7    0.21    0.28
  -2  -9   7   -0.07    0.50
   3  -3 -10   -0.80    0.32
   3  -3 -10   -0.32    0.47
   2  -4  -7    4.76    0.54
   2  -4  -7    3.63    0.69
  -1   5   4    3.95    0.54
  -1   5   4    5.85    0.73
   1  -5  -4    4.61    0.45
   1  -5  -4    5.36    0.68
   1  -5  -4    4.30    0.45
   0   6   1    7.17    0.75
   0   6   1    7.02    0.70
   0  -6  -1    5.66    0.72
   1   7  -2    1.11    0.36
   1   7  -2    0.57    0.44
  -1  -7   2    1.73    0.48
   2   8  -5    5.98    0.76
   2   8  -5    4.48    0.83
  -2  -8   5    3.67    0.72
  -2  -8   5    5.23    0.67
  -2  -8   5    5.24    0.48
   3   9  -8   -0.76    0.49
   3   9  -8   -0.68    0.49
  -3  -9   8    0.64    0.43
  -3  -9   8    0.03    0.25
  -3  -9   8    0.01    0.48
   3  -2 -12    0.45    0.59
   3  -2 -12    0.33    0.39
  -2   3   9    0.03    0.40
   2  -3  -9   -0.30    0.45
   2  -3  -9   -0.16    0.31
   1  -4  -6    0.87    0.26
   1  -4  -6    0.64    0.42
   0   5   3    0.67    0.30
   0  -5  -3    0.03    0.31
   1   6   0    6.31    0.63
   1   6   0    5.93    0.72
  -1  -6   0    5.72    0.68
   2   7  -3   33.65    2.34
   2   7  -3   34.91    2.49
  -2  -7   3   29.99    2.41
   3   8  -6    2.33    0.60
   3   8  -6    1.70    0.65
  -3  -8   6    2.31    0.49
  -3  -8   6    1.93    0.57
   2  -2 -11    0.50    0.37
   2  -2 -11    0.73    0.59
   1  -3  -8    0.58    0.45
   1  -3  -8    1.64    0.32
   0   4   5   12.69    0.96
   0  -4  -5   12.70    1.12
   1   5   2   17.21    1.24
   1   5   2   16.83    1.30
  -1  -5  -2   16.51    1.30
   2   6  -1    0.93    0.30
   2   6  -1    0.51    0.39
  -2  -6   1    0.21    0.33
   3   7  -4    1.59    0.54
   3   7  -4    1.81    0.46
  -3  -7   4    1.95    0.40
  -3  -7   4    1.84    0.47
   4   8  -7    0.33    0.51
  -4  -8   7   -0.07    0.58
  -4  -8   7   -0.45    0.39
   1  -2 -10    3.84    0.75
   1  -2 -10    4.00    0.50
   0  -3  -7    0.80    0.42
   1   4   4   -0.08    0.21
  -1  -4  -4    0.50    0.30
   2   5   1    7.21    0.73
   2   5   1    6.85    0.59
  -2  -5  -1    5.72    0.61
  -2  -5  -1    7.74    0.67
   3   6  -2   10.14    0.89
   3   6  -2    8.79    1.00
  -3  -6   2    8.30    0.85
   4   7  -5    1.21    0.54
  -4  -7   5    0.78    0.37
  -4  -7   5    1.46    0.49
   5   8  -8    2.86    0.76
  -5  -8   8    1.89    0.67
  -1   1  12    0.66    0.52
   1  -1 -12   -0.28    0.28
   1  -1 -12    0.16    0.54
   0  -2  -9   19.09    1.74
   0  -2  -9   20.94    1.39
  -1  -3  -6   23.94    1.71
  -1  -3  -6   23.88    1.81
   2   4   3    6.29    0.66
  -2  -4  -3    8.36    0.68
  -2  -4  -3    7.45    0.66
   3   5   0   19.16    1.52
  -3  -5   0   17.56    1.38
  -3  -5   0   20.83    1.42
   4   6  -3    1.91    0.54
  -4  -6   3    1.07    0.40
   5   7  -6    0.48    0.49
  -5  -7   6    0.15    0.42
   0   1  11    0.39    0.45
   0  -1 -11   -0.31    0.45
   0  -1 -11    0.13    0.22
  -1  -2  -8    7.58    0.90
  -1  -2  -8    6.71    0.67
  -2  -3  -5    6.78    0.74
  -2  -3  -5    8.08    0.78
  -2  -3  -5    8.52    0.72
   3   4   2    9.92    0.88
  -3  -4  -2   11.60    0.81
  -3  -4  -2    9.27    0.79
   4   5  -1   30.74    2.14
  -4  -5   1   26.61    1.99
   5   6  -4    1.54    0.54
  -5  -6   4    1.01    0.44
   6   7  -7    2.32    0.71
  -6  -7   7    2.08    0.64
   0   0  13   -0.23    0.48
   0   0 -13    0.66    0.30
   0   0 -13    0.06    0.54
   1   1  10    2.16    0.57
  -1  -1 -10    2.49    0.63
  -2  -2  -7   11.31    0.99
  -2  -2  -7   12.33    1.08
   3   3   4    0.83    0.23
  -3  -3  -4    0.86    0.23
  -3  -3  -4    0.59    0.24
  -3  -3  -4    0.91    0.37
   4   4   1   36.57    2.43
  -4  -4  -1   33.59    2.28
  -4  -4  -1   33.10    2.28
   5   5  -2    6.82    0.86
  -5  -5   2    6.92    0.73
   6   6  -5    1.95    0.62
  -6  -6   5    1.37    0.50
   1   0  12    1.37    0.56
  -1   0 -12    0.68    0.55
   2   1   9    9.87    1.04
  -2  -1  -9    8.82    0.89
  -2  -1  -9   10.63    1.04
   3   2   6    0.17    0.28
  -3  -2  -6    0.19    0.32
  -3  -2  -6   -0.07    0.24
   4   3   3    0.20    0.22
  -4  -3  -3    0.05    0.13
  -4  -3  -3   -0.09    0.15
  -4  -3  -3    0.57    0.37
   5   4   0    6.48    0.74
  -5  -4   0    5.33    0.52
  -5  -4   0    5.10    0.51
   6   5  -3    2.81    0.64
  -6  -5   3    4.05    0.58
   7   6  -6    8.71    1.17
  -7  -6   6    8.52    1.08
   2   0  11    4.66    0.75
  -2   0 -11    4.87    0.85
  -2   0 -11    5.55    0.68
   3   1   8    2.75    0.51
  -3  -1  -8    2.79    0.53
  -3  -1  -8    2.98    0.52
   4   2   5    1.95    0.36
  -4  -2  -5    1.89    0.30
  -4  -2  -5    2.43    0.35
  -4  -2  -5    1.83    0.47
   5   3   2    7.92    0.80
  -5  -3  -2    9.61    1.01
   6   4  -1    2.17    0.54
  -6  -4   1    2.01    0.37
   7   5  -4   -0.93    0.37
  -7  -5   4    0.42    0.39
   3   0  10    0.95    0.42
  -3   0 -10    0.18    0.46
  -3   0 -10   -0.45    0.30
   4   1   7    2.42    0.47
  -4  -1  -7    2.31    0.44
  -4  -1  -7    2.87    0.55
   5   2   4    2.77    0.33
   5   2   4    2.16    0.35
  -5  -2  -4    3.39    0.58
   6   3   1    7.77    0.83
  -6  -3  -1    7.63    0.96
   7   4  -2    2.54    0.60
  -7  -4   2    1.92    0.42
   8   5  -5    4.97    0.92
  -8  -5   5    6.03    0.87
   3  -1  12    1.89    0.57
  -3   1 -12    3.70    0.77
  -3   1 -12    1.87    0.52
   4   0   9    0.23    0.35
  -4   0  -9    0.23    0.36
  -4   0  -9    0.46    0.39
   5   1   6   14.44    1.13
  -5  -1  -6   14.36    1.11
  -5  -1  -6   15.07    1.30
   6   2   3   14.78    1.16
  -6  -2  -3   13.95    1.35
   7   3   0    0.24    0.38
  -7  -3   0    0.23    0.22
   8   4  -3   -0.50    0.39
  -8  -4   3    0.03    0.33
   4  -1  11    2.77    0.63
  -4   1 -11    2.59    0.56
  -4   1 -11    2.06    0.59
   5   0   8    0.71    0.35
  -5   0  -8    0.22    0.32
  -5   0  -8   -0.09    0.37
  -6  -1  -5    0.02    0.19
  -6  -1  -5    0.11    0.40
   7   2   2    2.77    0.51
  -7  -2  -2    2.90    0.65
  -7  -2  -2    3.26    0.63
   8   3  -1   -0.56    0.33
  -8  -3   1   -0.08    0.26
  -8  -3   1    0.14    0.48
  -9  -4   4    2.32    0.56
   5  -1  10    8.23    0.94
  -5   1 -10    8.01    0.97
  -5   1 -10    7.40    0.93
   6   0   7    3.20    0.48
  -6   0  -7    3.29    0.48
  -6   0  -7    3.42    0.63
  -7  -1  -4    5.68    0.84
  -8  -2  -1    0.22    0.23
  -8  -2  -1   -0.36    0.38
  -8  -2  -1    0.29    0.49
   9   3  -2    3.44    0.72
  -9  -3   2    3.64    0.81
  -9  -3   2    3.01    0.56
   6  -1   9    1.62    0.46
  -6   1  -9    1.44    0.54
  -6   1  -9    1.07    0.40
  -7   0  -6    4.65    0.55
  -7   0  -6    6.92    0.95
  -8  -1  -3   12.58    1.26
  -8  -1  -3   14.05    1.00
  -8  -1  -3   13.57    1.43
  -9  -2   0   -0.04    0.27
  -9  -2   0    0.30    0.49
  -9  -2   0   -0.12    0.48
  -7   1  -8   -0.71    0.39
  -7   1  -8   -0.29    0.28
  -8   0  -5    0.42    0.43
  -8   0  -5    0.52    0.25
  -8   0  -5    0.00    0.46
  -9  -1  -2    1.87    0.33
  -9  -1  -2    1.19    0.61
  -9  -1  -2    0.37    0.48
 -10  -2   1   -0.08    0.51
 -10  -2   1   -0.02    0.34
   7  -2  10    7.61    0.87
  -7   2 -10    7.78    1.01
  -7   2 -10    6.30    0.87
  -8   1  -7    0.24    0.31
  -8   1  -7    0.46    0.54
  -9   0  -4    2.02    0.57
  -9   0  -4    1.95    0.37
  -9   0  -4    2.07    0.66
 -10  -1  -1    0.28    0.53
 -10  -1  -1    0.41    0.32
 -10  -1  -1   -0.55    0.43
  -9   1  -6    0.05    0.28
  -9   1  -6    0.20    0.55
  -9   1  -6    0.64    0.44
 -10   0  -3    5.24    0.65
 -10   0  -3    6.72    1.05
 -10   0  -3    7.49    0.94
  -8  10   2    0.50    0.55
   8 -10  -2    0.13    0.50
   8 -10  -2    0.23    0.57
  -7  11  -1    1.95    0.70
  -7  11  -1    1.41    0.71
   7 -11   1    2.45    0.70
   7 -11   1    0.90    0.52
  -6  12  -4   21.27    1.98
   6 -12   4   15.97    1.80
   6 -12   4   20.79    1.71
  -8   9   4    1.31    0.71
   8  -9  -4    0.50    0.65
   8  -9  -4    0.96    0.59
  -7  10   1    0.14    0.59
  -7  10   1    0.03    0.51
   7 -10  -1   -0.21    0.44
   7 -10  -1    0.04    0.45
  -6  11  -2    0.13    0.58
   6 -11   2    0.52    0.57
   6 -11   2   -0.16    0.41
  -5  12  -5    4.02    0.90
   5 -12   5    3.48    0.70
   5 -12   5    4.12    0.86
  -7   9   3    0.00    0.47
   7  -9  -3   -0.29    0.39
   7  -9  -3    0.23    0.50
  -6  10   0    6.09    1.03
  -6  10   0    7.12    0.98
   6 -10   0    8.19    1.12
   6 -10   0    7.55    0.91
  -5  11  -3    3.02    0.79
   5 -11   3    2.48    0.68
   5 -11   3    2.99    0.62
  -4  12  -6    0.52    0.56
  -4  12  -6    0.65    0.63
   4 -12   6    0.60    0.58
   4 -12   6   -0.32    0.43
   7  -8  -5    0.37    0.57
   7  -8  -5    1.70    0.56
  -6   9   2   -0.12    0.45
  -6   9   2    0.11    0.54
   6  -9  -2   -0.13    0.45
   6  -9  -2    0.67    0.45
  -5  10  -1    7.34    1.06
  -5  10  -1    9.28    1.07
   5 -10   1    8.18    1.06
   5 -10   1    5.95    0.84
  -4  11  -4   -0.01    0.55
  -4  11  -4    0.32    0.47
   4 -11   4    0.61    0.54
   4 -11   4   -0.01    0.39
  -3  12  -7    0.46    0.60
  -3  12  -7    1.02    0.67
   3 -12   7    0.54    0.55
   3 -12   7    0.17    0.59
   3 -12   7   -0.32    0.41
  -7   7   7   -0.55    0.55
   7  -7  -7    0.30    0.48
   7  -7  -7   -0.35    0.47
  -6   8   4    0.40    0.47
   6  -8  -4   -0.38    0.41
   6  -8  -4   -0.20    0.46
  -5   9   1    0.52    0.52
  -5   9   1    0.29    0.43
   5  -9  -1    0.86    0.42
   5  -9  -1    0.38    0.49
  -4  10  -2    8.10    1.07
   4 -10   2    6.87    0.82
   4 -10   2    7.05    0.98
  -3  11  -5    0.35    0.52
  -3  11  -5   -0.01    0.51
   3 -11   5    0.60    0.52
   3 -11   5   -0.13    0.39
   6  -7  -6    1.53    0.53
   6  -7  -6    1.37    0.62
  -5   8   3    1.00    0.55
  -5   8   3    0.37    0.42
   5  -8  -3    0.61    0.49
   5  -8  -3    0.98    0.42
  -4   9   0    0.50    0.54
  -4   9   0    0.66    0.42
   4  -9   0    0.50    0.38
   4  -9   0   -0.95    0.35
  -3  10  -3    0.13    0.51
  -3  10  -3    0.64    0.46
   3 -10   3   -0.51    0.41
   3 -10   3    0.30    0.37
  -2  11  -6    3.03    0.69
  -2  11  -6    1.87    0.70
   2 -11   6    2.21    0.74
   2 -11   6    3.55    0.60
   2 -11   6    2.47    0.65
  -6   6   8    0.28    0.53
   6  -6  -8    0.40    0.54
   6  -6  -8    1.16    0.50
   5  -7  -5    1.43    0.58
   5  -7  -5    0.53    0.42
  -4   8   2    0.37    0.40
  -4   8   2    0.24    0.44
   4  -8  -2   -0.03    0.35
   4  -8  -2    0.28    0.46
  -3   9  -1    0.70    0.50
   3  -9   1    0.85    0.38
   3  -9   1    0.77    0.45
  -2  10  -4    0.81    0.48
  -2  10  -4    0.63    0.52
   2 -10   4    0.28    0.50
   2 -10   4    0.53    0.36
  -1  11  -7    0.48    0.53
  -1  11  -7    1.53    0.68
   1 -11   7    1.12    0.54
   1 -11   7    1.71    0.47
   1 -11   7    0.75    0.59
   5  -6  -7    4.95    0.87
   5  -6  -7    4.96    0.73
  -4   7   4    0.26    0.41
  -4   7   4    0.23    0.46
   4  -7  -4   -0.12    0.42
   4  -7  -4   -0.64    0.32
  -3   8   1    9.08    1.01
  -3   8   1    6.78    0.87
   3  -8  -1    9.23    0.82
   3  -8  -1    5.95    0.89
  -2   9  -2    0.05    0.44
  -2   9  -2   -0.25    0.34
   2  -9   2    0.22    0.46
   2  -9   2    0.77    0.34
  -1  10  -5    2.67    0.72
  -1  10  -5    2.73    0.61
   1 -10   5    2.20    0.47
   1 -10   5    2.77    0.69
   1 -10   5    2.81    0.59
   0  11  -8    0.84    0.54
   0  11  -8   -0.07    0.60
   0 -11   8   -0.14    0.47
   0 -11   8    0.60    0.61
   0 -11   8    1.29    0.42
  -5   5   9    4.43    0.74
   5  -5  -9    3.73    0.85
   5  -5  -9    4.58    0.71
   4  -6  -6    0.59    0.36
   4  -6  -6    0.19    0.49
  -3   7   3   -0.04    0.49
  -3   7   3    1.35    0.47
   3  -7  -3    0.92    0.36
   3  -7  -3    0.96    0.45
  -2   8   0    8.60    0.89
  -2   8   0    9.47    0.99
   2  -8   0    8.32    0.79
   2  -8   0    7.59    0.95
  -1   9  -3    0.73    0.49
  -1   9  -3    0.35    0.40
   1  -9   3    1.19    0.33
   1  -9   3    0.40    0.45
   0  10  -6   -0.15    0.50
   0  10  -6   -0.41    0.39
   0 -10   6    0.12    0.34
   0 -10   6    0.32    0.44
   0 -10   6   -0.66    0.46
   4  -5  -8    0.03    0.45
   4  -5  -8    0.66    0.40
   3  -6  -5   17.80    1.37
   3  -6  -5   17.40    1.56
  -2   7   2    0.18    0.38
   2  -7  -2   -0.30    0.27
   2  -7  -2   -0.22    0.36
  -1   8  -1    7.61    0.97
  -1   8  -1    9.35    0.93
   1  -8   1    9.43    1.00
   1  -8   1    9.53    0.79
   0   9  -4    1.82    0.50
   0   9  -4    1.17    0.56
   0  -9   4    1.77    0.37
   0  -9   4    1.91    0.55
   1  10  -7    0.39    0.55
   1  10  -7    0.59    0.54
  -1 -10   7    0.43    0.54
  -1 -10   7    1.28    0.51
  -1 -10   7    0.37    0.34
   4  -4 -10    2.15    0.52
   4  -4 -10    1.33    0.61
   3  -5  -7    1.51    0.57
   3  -5  -7    1.92    0.41
  -2   6   4    7.14    0.78
   2  -6  -4    7.22    0.88
   2  -6  -4    7.24    0.69
  -1   7   1    2.25    0.45
  -1   7   1    1.96    0.48
   1  -7  -1    1.73    0.32
   1  -7  -1    2.64    0.52
   0   8  -2    1.19    0.50
   0   8  -2    1.45    0.42
   0  -8   2    1.14    0.27
   0  -8   2    1.53    0.49
   1   9  -5    0.25    0.47
   1   9  -5    0.29    0.51
  -1  -9   5    0.38    0.27
  -1  -9   5    0.80    0.44
  -1  -9   5    0.64    0.48
   2  10  -8    0.91    0.59
   2  10  -8    0.22    0.59
  -2 -10   8    0.01    0.53
  -2 -10   8    0.64    0.49
  -2 -10   8    0.34    0.31
  -3   4   9   29.18    2.10
   3  -4  -9   26.49    2.32
   3  -4  -9   29.40    2.10
   2  -5  -6    0.51    0.29
   2  -5  -6    0.46    0.45
  -1   6   3    1.12    0.39
   1  -6  -3    0.82    0.20
   1  -6  -3    0.28    0.19
   1  -6  -3    0.04    0.36
   0   7   0   46.98    3.11
   0   7   0   43.51    3.17
   0  -7   0   44.75    3.18
   1   8  -3   -0.04    0.41
   1   8  -3    0.23    0.35
  -1  -8   3    0.65    0.43
  -1  -8   3    0.14    0.16
   2   9  -6    3.12    0.69
   2   9  -6    3.08    0.74
  -2  -9   6    3.65    0.41
  -2  -9   6    3.56    0.61
  -2  -9   6    3.10    0.72
   3  -3 -11    0.83    0.46
   3  -3 -11   -0.04    0.48
   2  -4  -8    3.70    0.51
   2  -4  -8    3.42    0.67
  -1   5   5    4.43    0.54
   1  -5  -5    4.74    0.45
   1  -5  -5    4.11    0.67
   0   6   2    1.93    0.40
   0   6   2    1.62    0.42
   0  -6  -2    1.61    0.42
   1   7  -1   -0.06    0.37
   1   7  -1   -0.04    0.29
  -1  -7   1   -0.20    0.32
   2   8  -4    1.83    0.50
   2   8  -4    1.23    0.55
  -2  -8   4    1.73    0.55
   3   9  -7    3.81    0.78
   3   9  -7    1.72    0.72
  -3  -9   7    3.89    0.60
  -3  -9   7    2.09    0.65
   2  -3 -10    2.70    0.45
   2  -3 -10    1.22    0.64
   1  -4  -7    2.78    0.58
   1  -4  -7    1.96    0.32
   0   5   4    1.22    0.35
   0  -5  -4    1.56    0.43
   1   6   1    0.28    0.27
   1   6   1    0.18    0.33
  -1  -6  -1    0.78    0.35
   2   7  -2    7.95    0.97
   2   7  -2    8.47    0.82
  -2  -7   2    9.12    0.93
   3   8  -5    5.44    0.92
  -3  -8   5    5.71    0.83
  -3  -8   5    5.59    0.69
  -2   2  12    0.11    0.50
   2  -2 -12    0.21    0.35
   2  -2 -12   -0.30    0.48
   1  -3  -9   37.40    2.51
   1  -3  -9   36.55    2.82
   0  -4  -6    2.53    0.55
   1   5   3   13.71    1.07
   1   5   3   12.97    1.02
  -1  -5  -3   12.58    1.09
   2   6   0   21.68    1.63
   2   6   0   24.95    1.78
  -2  -6   0   22.60    1.71
   3   7  -3    0.63    0.48
  -3  -7   3    0.66    0.37
   4   8  -6   -0.14    0.45
  -4  -8   6   -0.40    0.37
   1  -2 -11    0.42    0.29
   1  -2 -11    0.91    0.56
   0  -3  -8   11.44    1.15
   1   4   5   24.64    1.65
  -1  -4  -5   23.14    1.79
   2   5   2   32.79    2.19
  -2  -5  -2   29.87    2.16
  -2  -5  -2   29.90    2.14
   3   6  -1    8.77    1.01
  -3  -6   1   10.65    0.95
   4   7  -4    0.19    0.49
  -4  -7   4    0.45    0.40
   5   8  -7    0.31    0.51
  -5  -8   7    0.09    0.46
   0  -2 -10    0.34    0.49
  -1  -3  -7   22.89    1.71
  -1  -3  -7   25.24    1.86
   2   4   4   29.74    2.04
  -2  -4  -4   29.08    2.09
  -2  -4  -4   30.31    2.10
   3   5   1    6.12    0.66
  -3  -5  -1    3.88    0.48
  -3  -5  -1    3.45    0.47
   4   6  -2    6.22    0.84
  -4  -6   2    6.73    0.74
   5   7  -5    0.99    0.53
  -5  -7   5    0.84    0.49
   0   1  12    5.63    0.86
   0  -1 -12    3.50    0.83
  -1  -2  -9    0.12    0.44
  -1  -2  -9    0.64    0.29
  -2  -3  -6   22.26    1.65
  -2  -3  -6   22.22    1.69
   3   4   3    5.38    0.57
  -3  -4  -3    4.92    0.51
  -3  -4  -3    4.88    0.53
   4   5   0    8.15    0.92
  -4  -5   0    9.81    0.79
   5   6  -3    0.08    0.40
  -5  -6   3    0.43    0.36
   6   7  -6    5.17    0.91
  -6  -7   6    3.51    0.73
   1   1  11    6.90    0.95
  -1  -1 -11    6.04    0.95
   2   2   8   52.40    3.55
  -2  -2  -8   50.36    3.59
  -2  -2  -8   50.67    3.48
  -3  -3  -5    2.73    0.50
  -3  -3  -5    2.84    0.42
   4   4   2    4.33    0.54
  -4  -4  -2    3.22    0.35
  -4  -4  -2    2.52    0.34
   5   5  -1   22.32    1.81
  -5  -5   1   23.33    1.68
   6   6  -4    0.41    0.45
  -6  -6   4   -0.06    0.36
   2   1  10    0.62    0.42
  -2  -1 -10    0.16    0.32
  -2  -1 -10    0.31    0.44
   3   2   7   -0.16    0.28
  -3  -2  -7   -0.09    0.29
  -3  -2  -7   -0.63    0.27
   4   3   4    0.35    0.22
  -4  -3  -4    0.12    0.19
  -4  -3  -4    0.13    0.34
  -4  -3  -4    0.43    0.18
   5   4   1    1.26    0.39
  -5  -4  -1    1.25    0.23
  -5  -4  -1    1.64    0.26
   6   5  -2    3.25    0.63
  -6  -5   2    3.21    0.52
   7   6  -5    6.44    1.01
  -7  -6   5    7.83    0.97
   2   0  12    0.01    0.42
  -2   0 -12    0.99    0.56
   3   1   9    5.20    0.72
  -3  -1  -9    4.49    0.72
  -3  -1  -9    5.63    0.71
   4   2   6    2.11    0.39
  -4  -2  -6    1.85    0.36
  -4  -2  -6    1.89    0.48
   5   3   3    4.73    0.57
  -5  -3  -3    5.21    0.74
   6   4   0    7.50    0.91
  -6  -4   0    8.61    0.71
   7   5  -3    2.44    0.60
  -7  -5   3    1.44    0.44
   3   0  11    0.31    0.46
  -3   0 -11   -0.39    0.32
  -3   0 -11    0.10    0.42
   4   1   8    2.57    0.52
  -4  -1  -8    2.20    0.51
  -4  -1  -8    2.40    0.49
   5   2   5   -0.06    0.21
  -5  -2  -5    0.25    0.22
  -5  -2  -5    0.41    0.41
  -5  -2  -5   -0.10    0.19
   6   3   2    1.25    0.37
  -6  -3  -2    0.74    0.50
   7   4  -1    0.60    0.43
  -7  -4   1    1.31    0.33
   8   5  -4    8.07    1.11
  -8  -5   4    8.48    0.99
   4   0  10    6.20    0.82
  -4   0 -10    7.30    0.84
  -4   0 -10    5.60    0.85
   5   1   7    3.67    0.50
  -5  -1  -7    2.63    0.57
  -5  -1  -7    2.59    0.46
   6   2   4   42.01    2.88
  -6  -2  -4   41.93    3.05
   7   3   1    1.34    0.42
  -7  -3  -1    0.42    0.20
   8   4  -2    0.17    0.42
  -8  -4   2    0.14    0.31
   5   0   9    3.23    0.57
  -5   0  -9    2.58    0.59
  -5   0  -9    2.31    0.52
  -6  -1  -6   -0.18    0.38
  -6  -1  -6   -0.02    0.22
   7   2   3    4.20    0.59
  -7  -2  -3    5.11    0.83
   8   3   0    3.17    0.63
  -8  -3   0    3.18    0.44
  -9  -4   3    0.53    0.40
   5  -1  11    5.03    0.78
  -5   1 -11    5.57    0.80
  -5   1 -11    4.19    0.74
   6   0   8    0.25    0.32
  -6   0  -8    0.66    0.48
  -6   0  -8    0.27    0.30
  -7  -1  -5   -0.13    0.43
  -7  -1  -5   -0.04    0.18
   8   2   2   -0.64    0.28
  -8  -2  -2    0.30    0.45
  -9  -3   1    0.32    0.32
   6  -1  10    1.12    0.44
  -6   1 -10    1.33    0.47
  -6   1 -10    0.77    0.45
  -7   0  -7    1.20    0.34
  -7   0  -7    1.16    0.61
  -8  -1  -4    0.16    0.18
  -8  -1  -4    0.29    0.53
  -9  -2  -1   -0.77    0.43
  -9  -2  -1    0.19    0.25
  -9  -2  -1    0.75    0.57
  -7   1  -9   -0.10    0.31
  -7   1  -9   -0.44    0.40
  -8   0  -6    1.43    0.59
  -8   0  -6    0.32    0.27
  -9  -1  -3    3.74    0.73
  -9  -1  -3    2.93    0.41
  -9  -1  -3    3.31    0.79
  -8   1  -8    0.01    0.30
  -8   1  -8   -0.12    0.53
  -9   0  -5    0.85    0.29
  -9   0  -5    1.85    0.64
  -9   0  -5    1.62    0.56
 -10  -1  -2   -0.17    0.54
  -7  11   0    1.25    0.66
   7 -11   0    1.03    0.55
   7 -11   0    0.30    0.53
  -6  12  -3    4.82    0.97
   6 -12   3    2.42    0.80
   6 -12   3    4.64    0.73
  -7  10   2    1.11    0.68
   7 -10  -2    1.31    0.55
   7 -10  -2   -0.07    0.51
  -6  11  -1    0.55    0.59
   6 -11   1    0.01    0.44
   6 -11   1    0.81    0.58
  -5  12  -4    3.78    0.89
   5 -12   4    3.85    0.84
   5 -12   4    3.11    0.65
   7  -9  -4    0.62    0.61
   7  -9  -4    1.05    0.54
  -6  10   1    4.82    0.89
   6 -10  -1    3.53    0.66
   6 -10  -1    3.15    0.75
  -5  11  -2    1.60    0.67
   5 -11   2    1.18    0.48
   5 -11   2    1.99    0.65
  -4  12  -5    5.79    1.03
  -4  12  -5    5.64    0.88
   4 -12   5    4.81    0.75
   4 -12   5    5.78    1.03
  -7   8   6    2.51    0.77
   7  -8  -6    4.08    0.73
   7  -8  -6    3.60    0.82
  -6   9   3    0.67    0.59
   6  -9  -3    0.99    0.48
   6  -9  -3    0.63    0.56
  -5  10   0    1.37    0.60
   5 -10   0    0.34    0.53
   5 -10   0    0.34    0.41
  -4  11  -3    0.85    0.59
   4 -11   3    0.71    0.54
   4 -11   3    1.16    0.43
  -3  12  -6    0.34    0.53
  -3  12  -6    0.51    0.62
   3 -12   6   -0.53    0.37
   3 -12   6    0.36    0.59
   6  -8  -5    0.84    0.58
   6  -8  -5   -0.45    0.40
  -5   9   2    1.28    0.55
   5  -9  -2    0.76    0.43
   5  -9  -2   -0.05    0.46
  -4  10  -1    0.24    0.57
   4 -10   1    0.81    0.43
   4 -10   1    1.32    0.54
  -3  11  -4   -0.29    0.42
  -3  11  -4    0.29    0.52
   3 -11   4   -0.49    0.45
   3 -11   4   -0.01    0.39
  -6   7   7   -0.40    0.53
   6  -7  -7    0.33    0.44
   6  -7  -7    0.87    0.55
   5  -8  -4    1.59    0.49
   5  -8  -4    0.93    0.59
  -4   9   1    5.20    0.84
   4  -9  -1    4.08    0.60
   4  -9  -1    3.31    0.73
  -3  10  -2    0.30    0.42
  -3  10  -2    0.15    0.52
   3 -10   2   -0.43    0.41
   3 -10   2    0.20    0.35
  -2  11  -5    0.46    0.47
  -2  11  -5    0.51    0.56
   2 -11   5   -0.12    0.49
   2 -11   5    0.31    0.40
   5  -7  -6    0.80    0.59
   5  -7  -6    0.54    0.42
  -4   8   3    4.33    0.75
   4  -8  -3    4.04    0.75
   4  -8  -3    5.19    0.68
  -3   9   0    1.03    0.54
   3  -9   0    0.97    0.38
   3  -9   0    0.58    0.48
  -2  10  -3    3.58    0.78
  -2  10  -3    2.44    0.60
   2 -10   3    3.68    0.53
   2 -10   3    2.69    0.67
  -1  11  -6    0.48    0.52
  -1  11  -6    0.46    0.63
   1 -11   6   -0.26    0.39
   1 -11   6   -0.02    0.35
   1 -11   6    0.35    0.54
  -5   6   8    0.12    0.54
   5  -6  -8    0.94    0.48
   5  -6  -8    0.11    0.52
   4  -7  -5    0.12    0.34
   4  -7  -5    0.26    0.49
  -3   8   2    0.36    0.43
   3  -8  -2    0.18    0.44
   3  -8  -2    0.33    0.34
  -2   9  -1    3.65    0.64
  -2   9  -1    4.00    0.73
   2  -9   1    3.87    0.54
   2  -9   1    3.69    0.71
  -1  10  -4    0.45    0.56
  -1  10  -4    1.42    0.53
   1 -10   4    1.91    0.61
   1 -10   4    1.45    0.38
   0  11  -7    0.19    0.47
   0  11  -7    0.54    0.60
   0 -11   7    0.11    0.35
   0 -11   7    0.51    0.50
   0 -11   7    0.11    0.57
   5  -5 -10    0.70    0.63
   5  -5 -10    0.31    0.45
   4  -6  -7    0.52    0.38
   4  -6  -7    1.22    0.55
  -3   7   4    0.85    0.43
   3  -7  -4    0.39    0.32
   3  -7  -4    0.19    0.46
  -2   8   1    8.48    1.02
   2  -8  -1    9.03    0.83
   2  -8  -1    9.85    1.05
  -1   9  -2    7.27    0.93
  -1   9  -2    5.53    0.76
   1  -9   2    5.23    0.84
   1  -9   2    6.29    0.64
   0  10  -5    6.15    0.92
   0  10  -5    4.10    0.70
   0 -10   5    4.97    0.57
   0 -10   5    2.99    0.72
   0 -10   5    4.74    0.71
   4  -5  -9    0.02    0.50
   3  -6  -6    0.74    0.53
   3  -6  -6    1.10    0.36
  -2   7   3    1.28    0.45
   2  -7  -3    1.45    0.51
   2  -7  -3    2.06    0.36
  -1   8   0    0.15    0.34
  -1   8   0    0.48    0.42
   1  -8   0    0.32    0.24
   1  -8   0    0.60    0.45
   0   9  -3   -0.42    0.42
   0   9  -3    0.59    0.40
   0  -9   3    0.01    0.41
   0  -9   3    0.11    0.24
   1  10  -6    1.25    0.56
   1  10  -6    0.99    0.62
  -1 -10   6    0.20    0.50
  -1 -10   6    0.92    0.31
  -1 -10   6    1.05    0.48
   3  -5  -8    3.99    0.58
   3  -5  -8    3.84    0.75
  -2   6   5    0.79    0.36
   2  -6  -5    0.67    0.46
   2  -6  -5    0.78    0.28
  -1   7   2   10.46    1.03
   1  -7  -2   10.15    0.77
   0   8  -1    6.28    0.71
   0   8  -1    3.90    0.74
   0  -8   1    5.41    0.46
   0  -8   1    6.40    0.82
   1   9  -4    0.73    0.50
   1   9  -4    0.96    0.47
  -1  -9   4    0.10    0.20
  -1  -9   4    0.54    0.47
   2  10  -7    0.30    0.55
   2  10  -7   -0.05    0.57
  -2 -10   7   -0.10    0.53
  -2 -10   7    0.71    0.46
  -2 -10   7    0.01    0.23
   3  -4 -10    7.34    1.16
   3  -4 -10    8.55    0.87
   2  -5  -7    5.39    0.84
   2  -5  -7    5.86    0.61
  -1   6   4    2.46    0.47
   1  -6  -4    3.11    0.29
   1  -6  -4    1.05    0.32
   1  -6  -4    2.14    0.52
   0   7   1    2.39    0.46
   0   7   1    2.19    0.53
   0  -7  -1    3.23    0.58
   1   8  -2   -0.41    0.37
   1   8  -2    0.32    0.33
  -1  -8   2   -0.05    0.36
   2   9  -5   10.02    1.07
   2   9  -5    8.00    1.09
  -2  -9   5    8.26    0.84
  -2  -9   5    7.35    1.03
   2  -4  -9    6.08    0.97
   2  -4  -9    6.47    0.68
   1  -5  -6    3.71    0.36
   1  -5  -6    2.12    0.58
   0   6   3    2.15    0.45
   0  -6  -3    1.36    0.45
   1   7   0    1.15    0.45
   1   7   0    1.51    0.37
  -1  -7   0    1.40    0.44
   2   8  -3    0.11    0.42
  -2  -8   3    0.31    0.42
   3   9  -6    0.42    0.54
  -3  -9   6    0.16    0.50
  -3  -9   6    0.40    0.37
   2  -3 -11    0.52    0.35
   2  -3 -11    0.61    0.56
   1  -4  -8   -0.13    0.39
   1  -4  -8    0.18    0.20
   0   5   5    2.22    0.38
   0  -5  -5    2.84    0.53
   1   6   2    9.74    0.82
   1   6   2    9.63    0.89
[truncated: 31,439 more chars]
